# Supplementary material for: Prediction of mitochondrial genome-wide variation through sequencing of mitochondrion-enriched extracts
Source: PubMed Central journal article supplement (PMC7645498; doi:10.1038/s41598-020-76088-0), 2020-11-05
Supplement: 41598_2020_76088_MOESM1_ESM.pdf [file 41598_2020_76088_MOESM1_ESM.pdf]

SUPPLEMENTARY INFORMATION

**Prediction of mitochondrial genome-wide variation through sequencing of mitochondrion-enriched extracts**

Kelsey E. Fisher<sup>1,4</sup>, Steven P. Bradbury<sup>1,2</sup>, and Brad S. Coates<sup>3</sup>  
Iowa State University, Ames, IA 50011

<sup>1</sup>Department of Entomology, Iowa State University, Ames, IA, 50011

<sup>2</sup>Department of Natural Resource Ecology and Management, Iowa State University, Ames, IA 50011

<sup>3</sup>United States Department of Agriculture, Agriculture Research Station, Corn Insects and Crop Genetics Research Unit, Ames, IA 50011

<sup>4</sup>Corresponding author, email: [kefisher@iastate.edu](mailto:kefisher@iastate.edu), phone: 609-221-5129

**Figure S1:** Full gel electrophoresis of serial-diluted DNA extracted from the mitochondrial and nuclear fractions amplified in duplicate with mitochondrial primers (HCO/LCO; Folmer et al. 1994) and nuclear primers (Onapn1-F and -R; [46]). The cropped portion of the gel present in the manuscript is surrounded by the white box. Mitochondrial fraction (13,000 rcf) was PCR amplified with mitochondrial primers (i) and nuclear primers (ii). Nuclear fraction (6,000 rcf) was PCR amplified with mitochondrial primers (iii) and nuclear primers (iv). Lambda *HindIII* and *EcoRI* ladder appears to the left of each panel and was loaded alone in panel (v). Although nuclear DNA was present in both the mitochondrial and the nuclear fractions, mitochondrial DNA was only present in the mitochondrial fraction.

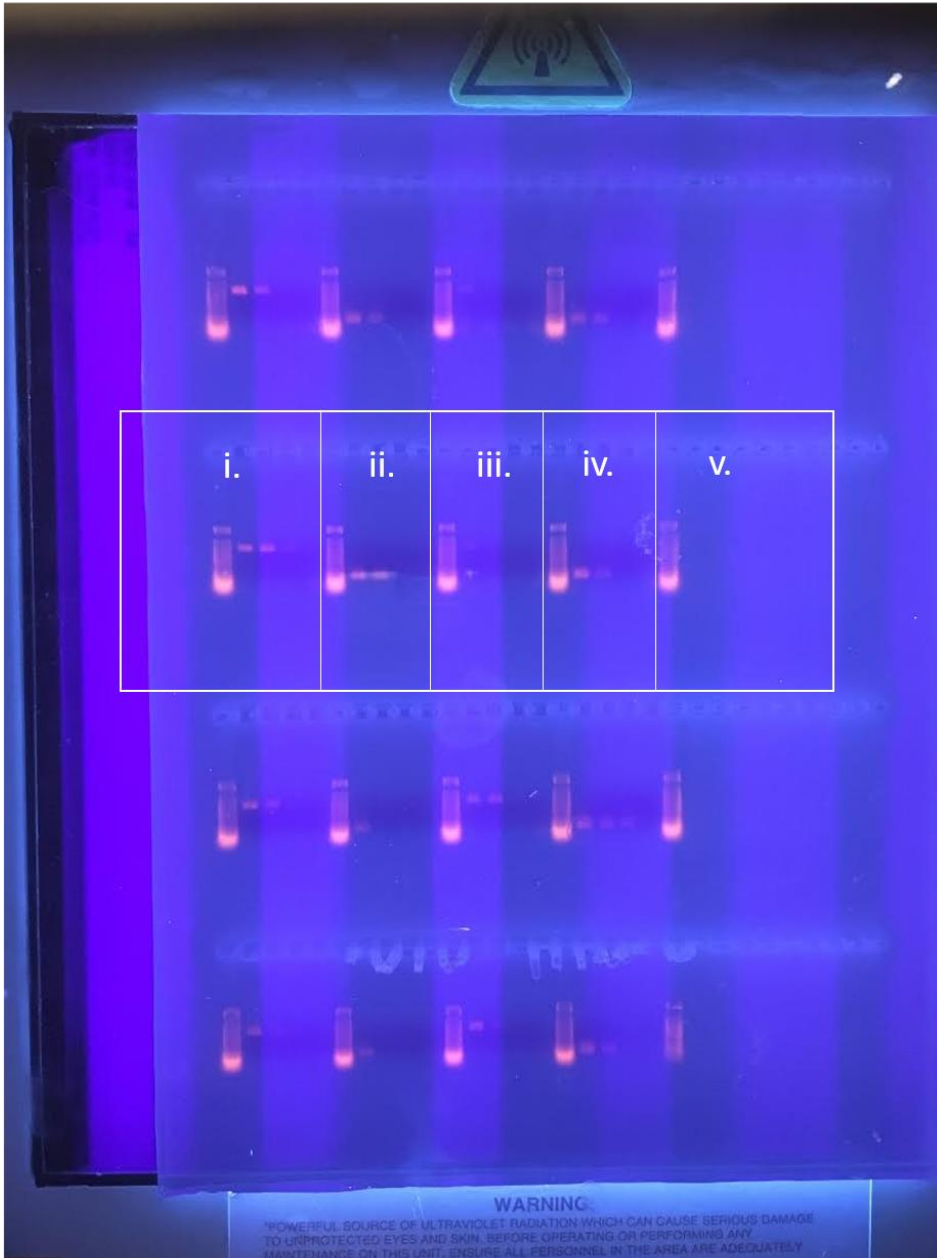



**Figure S3.** Multiple sequence alignment of Illumina short read sequence assembled *Ostrinia nubilalis* mitochondrial genome sequences. Corresponding protein coding sequence (CDS) and predicted amino acids, and RNA gene regions are indicated by strand. Highlighted nucleotides: substitutions (yellow), insertions/deletions (blue), start codons (green) and stop codons (\*; red). Positional information given in Table S3.

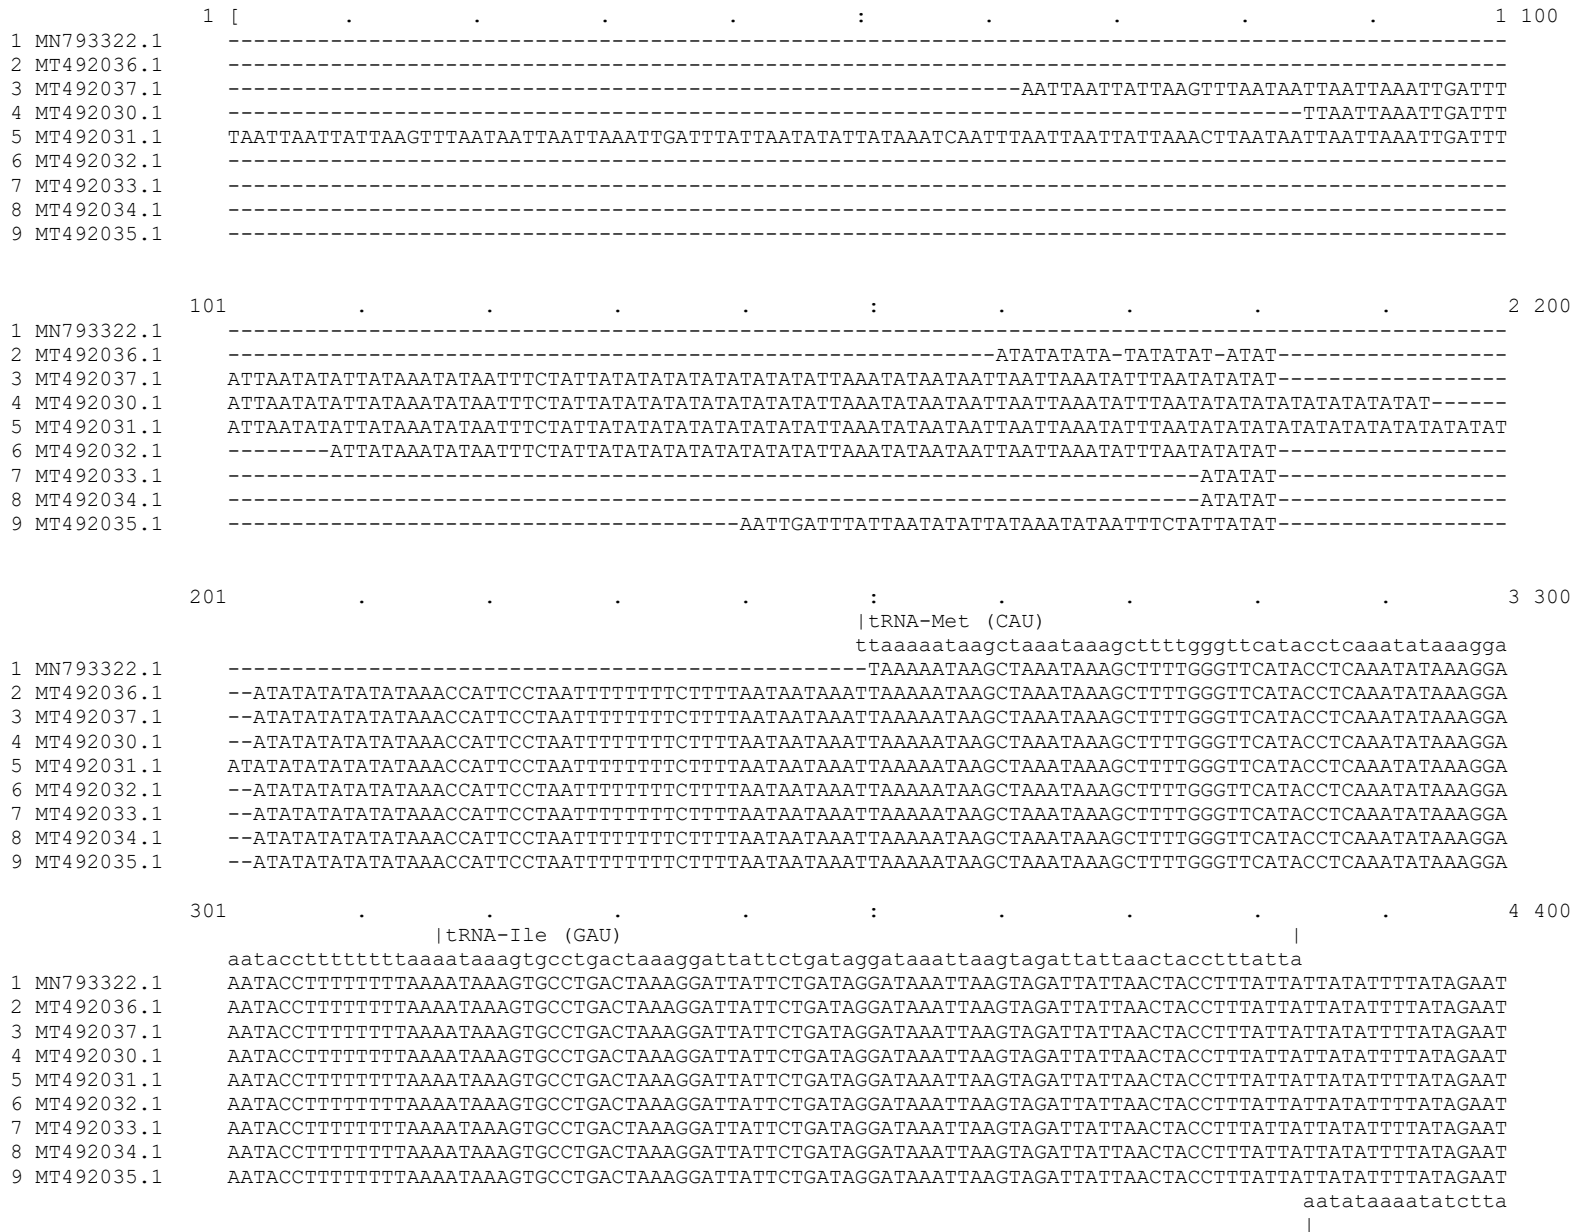

401 5 500  
1 MN793322.1 TAAACTATATCTAATAGTATCAAAAACATATCGTGCATCATACACTAAAAATATAAAATAAAATTTAAATTTTATATAAAAATATTTTTTATTT  
2 MT492036.1 TAAACTATATCTAATAGTATCAAAAACATATCGTGCATCATACACTAAAAATATAAAATAAAATTTAAATTTTATATAAAAATATTTTTTATTT  
3 MT492037.1 TAAACTATATCTAATAGTATCAAAAACATATCGTGCATCATACACTAAAAATATAAAATAAAATTTAAATTTTATATAAAAATATTTTTTATTT  
4 MT492030.1 TAAACTATATCTAATAGTATCAAAAACATATCGTGCATCATACACTAAAAATATAAAATAAAATTTAAATTTTATATAAAAATATTTTTTATTT  
5 MT492031.1 TAAACTATATCTAATAGTATCAAAAACATATCGTGCATCATACACTAAAAATATAAAATAAAATTTAAATTTTATATAAAAATATTTTTTATTT  
6 MT492032.1 TAAACTATATCTAATAGTATCAAAAACATATCGTGCATCATACACTAAAAATATAAAATAAAATTTAAATTTTATATAAAAATATTTTTTATTT  
7 MT492033.1 TAAACTATATCTAATAGTATCAAAAACATATCGTGCATCATACACTAAAAATATAAAATAAAATTTAAATTTTATATAAAAATATTTTTTATTT  
8 MT492034.1 TAAACTATATCTAATAGTATCAAAAACATATCGTGCATCATACACTAAAAATATAAAATAAAATTTAAATTTTATATAAAAATATTTTTTATTT  
9 MT492035.1 TAAACTATATCTAATAGTATCAAAAACATATCGTGCATCATACACTAAAAATATAAAATAAAATTTAAATTTTATATAAAAATATTTTTTATTT  
ATTTGATATAGATTATCATAGTTTTTTGATAGCACGTAGTATGTGATTTTATAT  
atttgatatagattatcatagtttttgatagcacgtagtatgtgatttttatat  
<- tRNA-Gln |

ND2 ->

501 6 600  
M N S N K M F F F F I L F F S T L I S I S S N S W F G C  
1 MN793322.1 TAAATTTTTTCCCCCTATAAAATCTAATAAAAATTTTTTTTTTTTTATTTTATTCTTTAGAACATTAATTTCAATTTCCCTCAAATTCATGATTTGGATGTT  
2 MT492036.1 TAAATTTTTTCCCCCTATAAAATCTAATAAAAATTTTTTTTTTTTTATTTTATTCTTTAGAACATTAATTTCAATTTCCCTCAAATTCATGATTTGGATGTT  
3 MT492037.1 TAAATTTTTTCCCCCTATAAAATCTAATAAAAATTTTTTTTTTTTTATTTTATTCTTTAGAACATTAATTTCAATTTCCCTCAAATTCATGATTTGGATGTT  
4 MT492030.1 TAAATTTTTTCCCCCTATAAAATCTAATAAAAATTTTTTTTTTTTTATTTTATTCTTTAGAACATTAATTTCAATTTCCCTCAAATTCATGATTTGGATGTT  
5 MT492031.1 TAAATTTTTTCCCCCTATAAAATCTAATAAAAATTTTTTTTTTTTTATTTTATTCTTTAGAACATTAATTTCAATTTCCCTCAAATTCATGATTTGGATGTT  
6 MT492032.1 TAAATTTTTTCCCCCTATAAAATCTAATAAAAATTTTTTTTTTTTTATTTTATTCTTTAGAACATTAATTTCAATTTCCCTCAAATTCATGATTTGGATGTT  
7 MT492033.1 TAAATTTTTTCCCCCTATAAAATCTAATAAAAATTTTTTTTTTTTTATTTTATTCTTTAGAACATTAATTTCAATTTCCCTCAAATTCATGATTTGGATGTT  
8 MT492034.1 TAAATTTTTTCCCCCTATAAAATCTAATAAAAATTTTTTTTTTTTTATTTTATTCTTTAGAACATTAATTTCAATTTCCCTCAAATTCATGATTTGGATGTT  
9 MT492035.1 TAAATTTTTTCCCCCTATAAAATCTAATAAAAATTTTTTTTTTTTTATTTTATTCTTTAGAACATTAATTTCAATTTCCCTCAAATTCATGATTTGGATGTT

601 7 700  
W I G L E I N L L S F I P I I N N S N N I L T S E A S L K Y F F T Q  
1 MN793322.1 GAATTGGATTAGAAATTAATTTATTAAGATTTATTTCCAATTATTAATAATCTAATAATATTTTAACATCTGAAGCATCATTAATAATTTTTTTACTCA  
2 MT492036.1 GAATTGGATTAGAAATTAATTTATTAAGATTTATTTCCAATTATTAATAATCTAATAATATTTTAACATCTGAAGCATCATTAATAATTTTTTTACTCA  
3 MT492037.1 GAATTGGATTAGAAATTAATTTATTAAGATTTATTTCCAATTATTAATAATCTAATAATATTTTAACATCTGAAGCATCATTAATAATTTTTTTACTCA  
4 MT492030.1 GAATTGGATTAGAAATTAATTTATTAAGATTTATTTCCAATTATTAATAATCTAATAATATTTTAACATCTGAAGCATCATTAATAATTTTTTTACTCA  
5 MT492031.1 GAATTGGATTAGAAATTAATTTATTAAGATTTATTTCCAATTATTAATAATCTAATAATATTTTAACATCTGAAGCATCATTAATAATTTTTTTACTCA  
6 MT492032.1 GAATTGGATTAGAAATTAATTTATTAAGATTTATTTCCAATTATTAATAATCTAATAATATTTTAACATCTGAAGCATCATTAATAATTTTTTTACTCA  
7 MT492033.1 GAATTGGATTAGAAATTAATTTATTAAGATTTATTTCCAATTATTAATAATCTAATAATATTTTAACATCTGAAGCATCATTAATAATTTTTTTACTCA  
8 MT492034.1 GAATTGGATTAGAAATTAATTTATTAAGATTTATTTCCAATTATTAATAATCTAATAATATTTTAACATCTGAAGCATCATTAATAATTTTTTTACTCA  
9 MT492035.1 GAATTGGATTAGAAATTAATTTATTAAGATTTATTTCCAATTATTAATAATCTAATAATATTTTAACATCTGAAGCATCATTAATAATTTTTTTACTCA

701 8 800  
A I A S I N L L F C I I I K M M F M K N F E M N N T I M I M M N S  
1 MN793322.1 AGCTATTGCATCAATTAATTTATTTGTATTATTATTTAAAATAATATTTATAAAAAATTTTGAATAAATAAATACTATTATAATTATAATAAATTCT  
2 MT492036.1 AGCTATTGCATCAATTAATTTATTTGTATTATTATTTAAAATAATATTTATAAAAAATTTTGAATAAATAAATACTATTATAATTATAATAAATTCT  
3 MT492037.1 AGCTATTGCATCAATTAATTTATTTGTATTATTATTTAAAATAATATTTATAAAAAATTTTGAATAAATAAATACTATTATAATTATAATAAATTCT  
4 MT492030.1 AGCTATTGCATCAATTAATTTATTTGTATTATTATTTAAAATAATATTTATAAAAAATTTTGAATAAATAAATACTATTATAATTATAATAAATTCT  
5 MT492031.1 AGCTATTGCATCAATTAATTTATTTGTATTATTATTTAAAATAATATTTATAAAAAATTTTGAATAAATAAATACTATTATAATTATAATAAATTCT  
6 MT492032.1 AGCTATTGCATCAATTAATTTATTTGTATTATTATTTAAAATAATATTTATAAAAAATTTTGAATAAATAAATACTATTATAATTATAATAAATTCT  
A I A S I N L L F C I I I K M M L M K N F E M N N T I M I M M N S  
7 MT492033.1 AGCTATTGCATCAATTAATTTATTTGTATTATTATTTAAAATAATATTTATAAAAAATTTTGAATAAATAAATACTATTATAATTATAATAAATTCT  
8 MT492034.1 AGCTATTGCATCAATTAATTTATTTGTATTATTATTTAAAATAATATTTATAAAAAATTTTGAATAAATAAATACTATTATAATTATAATAAATTCT  
9 MT492035.1 AGCTATTGCATCAATTAATTTATTTGTATTATTATTTAAAATAATATTTATAAAAAATTTTGAATAAATAAATACTATTATAATTATAATAAATTCT

801

9 900

S L L M K M G S A P F H F W F P N I I E G L S W F N S F I L M T W  
 1 MN793322.1 TCTTTATTAATAAAAAATAGGATCAGCCCCCTTTCATTTCTGATTCCCAAATATTATTGAAGGATTATCATGATTTAATAGATTTATTTTAATAACTTGAC  
 2 MT492036.1 TCTTTATTAATAAAAAATAGGATCAGCCCCCTTTCATTTCTGATTCCCAAATATTATTGAAGGATTATCATGATTTAATAGATTTATTTTAATAACTTGAC  
 3 MT492037.1 TCTTTATTAATAAAAAATAGGATCAGCCCCCTTTCATTTCTGATTCCCAAATATTATTGAAGGATTATCATGATTTAATAGATTTATTTTAATAACTTGAC  
 4 MT492030.1 TCTTTATTAATAAAAAATAGGATCAGCCCCCTTTCATTTCTGATTCCCAAATATTATTGAAGGATTATCATGATTTAATAGATTTATTTTAATAACTTGAC  
 5 MT492031.1 TCTTTATTAATAAAAAATAGGATCAGCCCCCTTTCATTTCTGATTCCCAAATATTATTGAAGGATTATCATGATTTAATAGATTTATTTTAATAACTTGAC  
 6 MT492032.1 TCTTTATTAATAAAAAATAGGATCAGCCCCCTTTCATTTCTGATTCCCAAATATTATTGAAGGATTATCATGATTTAATAGATTTATTTTAATAACTTGAC  
 7 MT492033.1 TCTTTATTAATAAAAAATAGGATCAGCCCCCTTTCATTTCTGATTCCCAAATATTATTGAAGGATTATCATGATTTAATAGATTTATTTTAATAACTTGAC  
 8 MT492034.1 TCTTTATTAATAAAAAATAGGATCAGCCCCCTTTCATTTCTGATTCCCAAATATTATTGAAGGATTATCATGATTTAATAGATTTATTTTAATAACTTGAC  
 9 MT492035.1 TCTTTATTAATAAAAAATAGGATCAGCCCCCTTTCATTTCTGATTCCCAAATATTATTGAAGGATTATCATGATTTAATAGATTTATTTTAATAACTTGAC

901

0 1000

Q K I S P M I L L S Y W Y N N N F L I L I I I L N S I I G A I G G L  
 1 MN793322.1 AAAAAATTTCCCTATAATTTTATTATCATACTGATACAATAATAATTTTTAATTTAATTATTATTTTAAATTCATTATTGGAGCTATTGGAGGATT  
 2 MT492036.1 AAAAAATTTCCCTATAATTTTATTATCATACTGATACAATAATAATTTTTAATTTAATTATTATTTTAAATTCATTATTGGAGCTATTGGAGGATT  
 3 MT492037.1 AAAAAATTTCCCTATAATTTTATTATCATACTGATACAATAATAATTTTTAATTTAATTATTATTTTAAATTCATTATTGGAGCTATTGGAGGATT  
 4 MT492030.1 AAAAAATTTCCCTATAATTTTATTATCATACTGATACAATAATAATTTTTAATTTAATTATTATTTTAAATTCATTATTGGAGCTATTGGAGGATT  
 5 MT492031.1 AAAAAATTTCCCTATAATTTTATTATCATACTGATACAATAATAATTTTTAATTTAATTATTATTTTAAATTCATTATTGGAGCTATTGGAGGATT  
 6 MT492032.1 AAAAAATTTCCCTATAATTTTATTATCATACTGATACAATAATAATTTTTAATTTAATTATTATTTTAAATTCATTATTGGAGCTATTGGAGGATT  
 7 MT492033.1 AAAAAATTTCCCTATAATTTTATTATCATACTGATACAATAATAATTTTTAATTTAATTATTATTTTAAATTCATTATTGGAGCTATTGGAGGATT  
 8 MT492034.1 AAAAAATTTCCCTATAATTTTATTATCATACTGATACAATAATAATTTTTAATTTAATTATTATTTTAAATTCATTATTGGAGCTATTGGAGGATT  
 9 MT492035.1 AAAAAATTTCCCTATAATTTTATTATCATACTGATACAATAATAATTTTTAATTTAATTATTATTTTAAATTCATTATTGGAGCTATTGGAGGATT

1001

1 1100

N Q T S I R K L M T F S S I N N L S W M M S A M M I S E N L W M F  
 1 MN793322.1 AAATCAAACATCAATTCGAAAATTAATAACTTTTTCTTCTATTAATAAATTTAAGATGAATAATATCTGCAATAATAAATTAGAGAAAACCTTATGAATATTT  
 2 MT492036.1 AAATCAAACATCAATTCGAAAATTAATAACTTTTTCTTCTATTAATAAATTTAAGATGAATAATATCTGCAATAATAAATTAGAGAAAACCTTATGAATATTT  
 3 MT492037.1 AAATCAAACATCAATTCGAAAATTAATAACTTTTTCTTCTATTAATAAATTTAAGATGAATAATATCTGCAATAATAAATTAGAGAAAACCTTATGAATATTT  
 4 MT492030.1 AAATCAAACATCAATTCGAAAATTAATAACTTTTTCTTCTATTAATAAATTTAAGATGAATAATATCTGCAATAATAAATTAGAGAAAACCTTATGAATATTT  
 5 MT492031.1 AAATCAAACATCAATTCGAAAATTAATAACTTTTTCTTCTATTAATAAATTTAAGATGAATAATATCTGCAATAATAAATTAGAGAAAACCTTATGAATATTT  
 6 MT492032.1 AAATCAAACATCAATTCGAAAATTAATAACTTTTTCTTCTATTAATAAATTTAAGATGAATAATATCTGCAATAATAAATTAGAGAAAACCTTATGAATATTT  
 7 MT492033.1 AAATCAAACATCAATTCGAAAATTAATAACTTTTTCTTCTATTAATAAATTTAAGATGAATAATATCTGCAATAATAAATTAGAGAAAACCTTATGAATATTT  
 8 MT492034.1 AAATCAAACATCAATTCGAAAATTAATAACTTTTTCTTCTATTAATAAATTTAAGATGAATAATATCTGCAATAATAAATTAGAGAAAACCTTATGAATATTT  
 9 MT492035.1 AAATCAAACATCAATTCGAAAATTAATAACTTTTTCTTCTATTAATAAATTTAAGATGAATAATATCTGCAATAATAAATTAGAGAAAACCTTATGAATATTT

1101

2 1200

Y F F M Y S F L I S I L C L L F S M I N M F F I N Q L F F F N I N  
 1 MN793322.1 TATTTTTTATATACTCATTTTTAATTAGAAATTTTATGCTTATTATTTTCTATAATTAATAATATTTTTTATTAATCAATTATTTTTTTTTAATATTAATT  
 2 MT492036.1 TATTTTTTATATACTCATTTTTAATTAGAAATTTTATGCTTATTATTTTCTATAATTAATAATATTTTTTATTAATCAATTATTTTTTTTTAATATTAATT  
 3 MT492037.1 TATTTTTTATATACTCATTTTTAATTAGAAATTTTATGCTTATTATTTTCTATAATTAATAATATTTTTTATTAATCAATTATTTTTTTTTAATATTAATT  
 4 MT492030.1 TATTTTTTATATACTCATTTTTAATTAGAAATTTTATGCTTATTATTTTCTATAATTAATAATATTTTTTATTAATCAATTATTTTTTTTTAATATTAATT  
 5 MT492031.1 TATTTTTTATATACTCATTTTTAATTAGAAATTTTATGCTTATTATTTTCTATAATTAATAATATTTTTTATTAATCAATTATTTTTTTTTAATATTAATT  
 6 MT492032.1 TATTTTTTATATACTCATTTTTAATTAGAAATTTTATGCTTATTATTTTCTATAATTAATAATATTTTTTATTAATCAATTATTTTTTTTTAATATTAATT  
 7 MT492033.1 TATTTTTTATATACTCATTTTTAATTAGAAATTTTATGCTTATTATTTTCTATAATTAATAATATTTTTTATTAATCAATTATTTTTTTTTAATATTAATT  
 8 MT492034.1 TATTTTTTATATACTCATTTTTAATTAGAAATTTTATGCTTATTATTTTCTATAATTAATAATATTTTTTATTAATCAATTATTTTTTTTTAATATTAATT  
 9 MT492035.1 TATTTTTTATATACTCATTTTTAATTAGAAATTTTATGCTTATTATTTTCTATAATTAATAATATTTTTTATTAATCAATTATTTTTTTTTAATATTAATT

1201 . . . . . : . . . . . 3 1300

1 MN793322.1 Y L I K L S L L I N F L S L G G L P P F M G F L P K W I I I N F M L  
2 MT492036.1 ATTTAATTA AATTATCATTATTAATTAATTTTTTATCATTGGGAGGACTTCCACCTTTTATAGGATTTTTACCTAAATGAATTATCATTAAATTTTATATT  
3 MT492037.1 ATTTAATTA AATTATCATTATTAATTAATTTTTTATCATTAGGAGGACTTCCACCTTTTATAGGATTTTTACCTAAATGAATTATCATTAAATTTTATATT  
4 MT492030.1 ATTTAATTA AATTATCATTATTAATTAATTTTTTATCATTAGGAGGACTTCCACCTTTTATAGGATTTTTACCTAAATGAATTATCATTAAATTTTATATT  
5 MT492031.1 ATTTAATTA AATTATCATTATTAATTAATTTTTTATCATTAGGAGGACTTCCACCTTTTATAGGATTTTTACCTAAATGAATTATCATTAAATTTTATATT  
6 MT492032.1 ATTTAATTA AATTATCATTATTAATTAATTTTTTATCATTAGGAGGACTTCCACCTTTTATAGGATTTTTACCTAAATGAATTATCATTAAATTTTATATT  
7 MT492033.1 ATTTAATTA AATTATCATTATTAATTAATTTTTTATCATTAGGAGGACTTCCACCTTTTATAGGATTTTTACCTAAATGAATTATCATTAAATTTTATATT  
8 MT492034.1 ATTTAATTA AATTATCATTATTAATTAATTTTTTATCATTAGGAGGACTTCCACCTTTTATAGGATTTTTACCTAAATGAATTATCATTAAATTTTATATT  
9 MT492035.1 ATTTAATTA AATTATCATTATTAATTAATTTTTTATCATTAGGAGGACTTCCACCTTTTATAGGATTTTTACCTAAATGAATTATCATTAAATTTTATATT

1301 . . . . . : . . . . . 4 1400

1 MN793322.1 N S N L Y F L T F I L I M M S L I L L F F Y I R I L Y S S F M F N  
2 MT492036.1 AAATAGAAATCTTTATTTTTTAACTTTTATTTAATATAAATAAGATTAATTTTATATTTTTTTATATTCGAATTTTATATTCATCATTATATTTAAT  
3 MT492037.1 AAATAGAAATCTTTATTTTTTAACTTTTATTTAATATAAATAAGATTAATTTTATATTTTTTTTATATTCGAATTTTATATTCATCATTATATTTAAT  
4 MT492030.1 AAATAGAAATCTTTATTTTTTAACTTTTATTTAATATAAATAAGATTAATTTTATATTTTTTTTATATTCGAATTTTATATTCATCATTATATTTAAT  
5 MT492031.1 AAATAGAAATCTTTATTTTTTAACTTTTATTTAATATAAATAAGATTAATTTTATATTTTTTTTATATTCGAATTTTATATTCATCATTATATTTAAT  
6 MT492032.1 AAATAGAAATCTTTATTTTTTAACTTTTATTTAATATAAATAAGATTAATTTTATATTTTTTTTATATTCGAATTTTATATTCATCATTATATTTAAT  
7 MT492033.1 AAATAGAAATCTTTATTTTTTAACTTTTATTTAATATAAATAAGATTAATTTTATATTTTTTTTATATTCGAATTTTATATTCATCATTATATTTAAT  
8 MT492034.1 AAATAGAAATCTTTATTTTTTAACTTTTATTTAATATAAATAAGATTAATTTTATATTTTTTTTATATTCGAATTTTATATTCATCATTATATTTAAT  
9 MT492035.1 AAATAGAAATCTTTATTTTTTAACTTTTATTTAATATAAATAAGATTAATTTTATATTTTTTTTATATTCGAATTTTATATTCATCATTATATTTAAT

1401 . . . . . : . . . . . 5 1500

1 MN793322.1 Y L K L K W I K I K I K N N M F N I M N F L S F F S I L G L I T S  
2 MT492036.1 TATTTAAAATTA AAAATGAATTA AAAATCAAAAATAAATAATTTAACATTATAAAATTTCTTATCTTTTTTCTCTATTTTAGGGTTAATTACAAGAA  
3 MT492037.1 TATTTAAAATTA AAAATGAATTA AAAATCAAAAATAAATAATTTAACATTATAAAATTTCTTATCTTTTTTCTCTATTTTAGGGTTAATTACAAGAA  
4 MT492030.1 TATTTAAAATTA AAAATGAATTA AAAATCAAAAATAAATAATTTAACATTATAAAATTTCTTATCTTTTTTCTCTATTTTAGGGTTAATTACAAGAA  
5 MT492031.1 TATTTAAAATTA AAAATGAATTA AAAATCAAAAATAAATAATTTAACATTATAAAATTTCTTATCTTTTTTCTCTATTTTAGGGTTAATTACAAGAA  
6 MT492032.1 TATTTAAAATTA AAAATGAATTA AAAATCAAAAATAAATAATTTAACATTATAAAATTTCTTATCTTTTTTCTCTATTTTAGGGTTAATTACAAGAA  
7 MT492033.1 TATTTAAAATTA AAAATGAATTA AAAATCAAAAATAAATAATTTAACATTATAAAATTTCTTATCTTTTTTCTCTATTTTAGGGTTAATTACAAGAA  
8 MT492034.1 TATTTAAAATTA AAAATGAATTA AAAATCAAAAATAAATAATTTAACATTATAAAATTTCTTATCTTTTTTCTCTATTTTAGGGTTAATTACAAGAA  
9 MT492035.1 TATTTAAAATTA AAAATGAATTA AAAATCAAAAATAAATAATTTAACATTATAAAATTTCTTATCTTTTTTCTCTATTTTAGGGTTAATTACAAGAA

| tRNA-Trp -> |

1501 . . . . . : . . . . . 6 1600

1 MN793322.1 T F F F M \* aagggttttaagttaaattaaactaataaatcttcaaaattatttataaagaaaattctttaagcctta  
2 MT492036.1 CTTTTTTTTTATA TAA AATTATTAAGGTTTTAAGTTAAATTAACCTAATAATCTTCAAAAATTATTTATAAAGAAAATTCCTTAAGCCTTAATAATTTTA  
3 MT492037.1 CTTTTTTTTTATA TAA AATTATTAAGGTTTTAAGTTAAATTAACCTAATAATCTTCAAAAATTATTTATAAAGAAAATTCCTTAAGCCTTAATAATTTTA  
4 MT492030.1 CTTTTTTTTTATA TAA AATTATTAAGGTTTTAAGTTAAATTAACCTAATAATCTTCAAAAATTATTTATAAAGAAAATTCCTTAAGCCTTAATAATTTTA  
5 MT492031.1 CTTTTTTTTTATA TAA AATTATTAAGGTTTTAAGTTAAATTAACCTAATAATCTTCAAAAATTATTTATAAAGAAAATTCCTTAAGCCTTAATAATTTTA  
6 MT492032.1 CTTTTTTTTTATA TAA AATTATTAAGGTTTTAAGTTAAATTAACCTAATAATCTTCAAAAATTATTTATAAAGAAAATTCCTTAAGCCTTAATAATTTTA  
7 MT492033.1 CTTTTTTTTTATA TAA AATTATTAAGGTTTTAAGTTAAATTAACCTAATAATCTTCAAAAATTATTTATAAAGAAAATTCCTTAAGCCTTAATAATTTTA  
8 MT492034.1 CTTTTTTTTTATA TAA AATTATTAAGGTTTTAAGTTAAATTAACCTAATAATCTTCAAAAATTATTTATAAAGAAAATTCCTTAAGCCTTAATAATTTTA  
9 MT492035.1 CTTTTTTTTTATA TAA AATTATTAAGGTTTTAAGTTAAATTAACCTAATAATCTTCAAAAATTATTTATAAAGAAAATTCCTTAAGCCTTAATAATTTTA  
ttcgaattattaaat

1601 . . . . . : . . . . . 7 1700  
1 MN793322.1 TTTATACCTTAAAATTGCAATTTTACATCATAATTGAATATAAGACTTAATAAAAAGAATTAATCTTGTTAATAAAATTACAATTTATCGCTTAAAT  
2 MT492036.1 TTTATACCTTAAAATTGCAATTTTACATCATAATTGAATATAAGACTTAATAAAAAGAATTAATCTTGTTAATAAAATTACAATTTATCGCTTAAAT  
3 MT492037.1 TTTATACCTTAAAATTGCAATTTTACATCATAATTGAATATAAGACTTAATAAAAAGAATTAATCTTGTTAATAAAATTACAATTTATCGCTTAAAT  
4 MT492030.1 TTTATACCTTAAAATTGCAATTTTACATCATAATTGAATATAAGACTTAATAAAAAGAATTAATCTTGTTAATAAAATTACAATTTATCGCTTAAAT  
5 MT492031.1 TTTATACCTTAAAATTGCAATTTTACATCATAATTGAATATAAGACTTAATAAAAAGAATTAATCTTGTTAATAAAATTACAATTTATCGCTTAAAT  
6 MT492032.1 TTTATACCTTAAAATTGCAATTTTACATCATAATTGAATATAAGACTTAATAAAAAGAATTAATCTTGTTAATAAAATTACAATTTATCGCTTAAAT  
7 MT492033.1 TTTATACCTTAAAATTGCAATTTTACATCATAATTGAATATAAGACTTAATAAAAAGAATTAATCTTGTTAATAAAATTACAATTTATCGCTTAAAT  
8 MT492034.1 TTTATACCTTAAAATTGCAATTTTACATCATAATTGAATATAAGACTTAATAAAAAGAATTAATCTTGTTAATAAAATTACAATTTATCGCTTAAAT  
9 MT492035.1 TTTATACCTTAAAATTGCAATTTTACATCATAATTGAATATAAGACTTAATAAAAAGAATTAATCTTGTTAATAAAATTACAATTTATCGCTTAAAT  
Aaatatggaatnttaaacgttaaaatgtagtattaacttatattctgaattatnttttcttaattaagaacaattatntaaatgntaaatagcgaatntta  
<- tRNA-Cys |

| COI ->  
1701 . . . . . : . . . . . 8 1800  
R K W L Y S T N H K D I G T L Y F I F G I W S G M  
1 MN793322.1 CTCAGCCATTTTATTTAATT-AGCGAAAATGACTATATTCACCAAATCATAAAGATATTGGAACCTTATATTTTATTTTGGAAATTTGAAGAGGAATAG  
2 MT492036.1 CTCAGCCATTTTATTTAATT-AGCGAAAATGACTATATTCACCAAATCATAAAGATATTGGAACCTTATATTTTATTTTGGAAATTTGAAGAGGAATAG  
3 MT492037.1 CTCAGCCATTTTATTTAATT-AGCGAAAATGACTATATTCACCAAATCATAAAGATATTGGAACCTTATATTTTATTTTGGAAATTTGAAGAGGAATAG  
4 MT492030.1 CTCAGCCATTTTATTTAATT-AGCGAAAATGACTATATTCACCAAATCATAAAGATATTGGAACCTTATATTTTATTTTGGAAATTTGAAGAGGAATAG  
5 MT492031.1 CTCAGCCATTTTATTTAATT-AGCGAAAATGACTATATTCACCAAATCATAAAGATATTGGAACCTTATATTTTATTTTGGAAATTTGAAGAGGAATAG  
6 MT492032.1 CTCAGCCATTTTATTTAATT-AGCGAAAATGACTATATTCACCAAATCATAAAGATATTGGAACCTTATATTTTATTTTGGAAATTTGAAGAGGAATAG  
7 MT492033.1 CTCAGCCATTTTATTTAATT-AGCGAAAATGACTATATTCACCAAATCATAAAGATATTGGAACCTTATATTTTATTTTGGAAATTTGAAGAGGAATAG  
8 MT492034.1 CTCAGCCATTTTATTTAATT-AGCGAAAATGACTATATTCACCAAATCATAAAGATATTGGAACCTTATATTTTATTTTGGAAATTTGAAGAGGAATAG  
9 MT492035.1 CTCAGCCATTTTATTTAATT-AGCGAAAATGACTATATTCACCAAATCATAAAGATATTGGAACCTTATATTTTATTTTGGAAATTTGAAGAGGAATAG  
gagtcggtaaaataa  
<- tRNA-Tyr |

1801 . . . . . : . . . . . 9 1900  
V G T S L S L L I R A E L G N P G S L I G D D Q I Y N T I V T A H A  
1 MN793322.1 TAGGAACTTCCTAAGTTTATTAATTCGAGCTGAATTAGGTAATCCTGGATCATTAAATGGAGATGATCAAATTTATAATACAATTGTAACAGCTCATGC  
2 MT492036.1 TAGGAACTTCCTAAGTTTATTAATTCGAGCTGAATTAGGTAATCCTGGATCATTAAATGGAGATGATCAAATTTATAATACAATTGTAACAGCTCATGC  
3 MT492037.1 TAGGAACTTCCTAAGTTTATTAATTCGAGCTGAATTAGGTAATCCTGGATCATTAAATGGAGATGATCAAATTTATAATACAATTGTAACAGCTCATGC  
4 MT492030.1 TAGGAACTTCCTAAGTTTATTAATTCGAGCTGAATTAGGTAATCCTGGATCATTAAATGGAGATGATCAAATTTATAATACAATTGTAACAGCTCATGC  
5 MT492031.1 TAGGAACTTCCTAAGTTTATTAATTCGAGCTGAATTAGGTAATCCTGGATCATTAAATGGAGATGATCAAATTTATAATACAATTGTAACAGCTCATGC  
6 MT492032.1 TAGGAACTTCCTAAGTTTATTAATTCGAGCTGAATTAGGTAATCCTGGATCATTAAATGGAGATGATCAAATTTATAATACAATTGTAACAGCTCATGC  
7 MT492033.1 TAGGAACTTCCTAAGTTTATTAATTCGAGCTGAATTAGGTAATCCTGGATCATTAAATGGAGATGATCAAATTTATAATACAATTGTAACAGCTCATGC  
8 MT492034.1 TAGGAACTTCCTAAGTTTATTAATTCGAGCTGAATTAGGTAATCCTGGATCATTAAATGGAGATGATCAAATTTATAATACAATTGTAACAGCTCATGC  
9 MT492035.1 TAGGAACTTCCTAAGTTTATTAATTCGAGCTGAATTAGGTAATCCTGGATCATTAAATGGAGATGATCAAATTTATAATACAATTGTAACAGCTCATGC

1901 . . . . . : . . . . . 0 2000  
F I M I F F M V M P I M I G G F G N W L V P L M L G A P D M A F P  
1 MN793322.1 ATTTATTATAATTTTTTTTATAGTAATACCTATTATAATTTGGTGGATTTGGAAATTGATTAGTACCTCTAATATTAGGAGCTCCTGATATAGCATTCCCA  
2 MT492036.1 ATTTATTATAATTTTTTTTATAGTAATACCTATTATAATTTGGTGGATTTGGAAATTGATTAGTACCTCTAATATTAGGAGCTCCTGATATAGCATTCCCA  
3 MT492037.1 ATTTATTATAATTTTTTTTATAGTAATACCTATTATAATTTGGTGGATTTGGAAATTGATTAGTACCTCTAATATTAGGAGCTCCTGATATAGCATTCCCA  
4 MT492030.1 ATTTATTATAATTTTTTTTATAGTAATACCTATTATAATTTGGTGGATTTGGAAATTGATTAGTACCTCTAATATTAGGAGCTCCTGATATAGCATTCCCA  
5 MT492031.1 ATTTATTATAATTTTTTTTATAGTAATACCTATTATAATTTGGTGGATTTGGAAATTGATTAGTACCTCTAATATTAGGAGCTCCTGATATAGCATTCCCA  
6 MT492032.1 ATTTATTATAATTTTTTTTATAGTAATACCTATTATAATTTGGTGGATTTGGAAATTGATTAGTACCTCTAATATTAGGAGCTCCTGATATAGCATTCCCA  
7 MT492033.1 ATTTATTATAATTTTTTTTATAGTAATACCTATTATAATTTGGTGGATTTGGAAATTGATTAGTACCTCTAATATTAGGAGCTCCTGATATAGCATTCCCA  
8 MT492034.1 ATTTATTATAATTTTTTTTATAGTAATACCTATTATAATTTGGTGGATTTGGAAATTGATTAGTACCTCTAATATTAGGAGCTCCTGATATAGCATTCCCA  
9 MT492035.1 ATTTATTATAATTTTTTTTATAGTAATACCTATTATAATTTGGTGGATTTGGAAATTGATTAGTACCTCTAATATTAGGAGCTCCTGATATAGCATTCCCA



2001

R M N N N M S F W L L P P S L T L L I S S S I V E N G A G T G W T V  
 1 MN793322.1 CGAATAAATAATATAAGATTTTGATTATTACCCCCATCATTAAACCCCTTTTAATTTCAAGAAGAATCGTTGAAAATGGAGCAGGAACCTGGTTGAACCTGTTT  
 2 MT492036.1 CGAATAAATAATATAAGATTTTGATTATTACCCCCATCATTAAACCCCTTTTAATTTCAAGAAGAATCGTTGAAAATGGAGCAGGAACCTGGTTGAACCTGTTT  
 3 MT492037.1 CGAATAAATAATATAAGATTTTGATTATTACCCCCATCATTAAACCCCTTTTAATTTCAAGAAGAATCGTTGAAAATGGAGCAGGAACCTGGTTGAACCTGTTT  
 4 MT492030.1 CGAATAAATAATATAAGATTTTGATTATTACCCCCATCATTAAACCCCTTTTAATTTCAAGAAGAATCGTTGAAAATGGAGCAGGAACCTGGTTGAACCTGTTT  
 5 MT492031.1 CGAATAAATAATATAAGATTTTGATTATTACCCCCATCATTAAACCCCTTTTAATTTCAAGAAGAATCGTTGAAAATGGAGCAGGAACCTGGTTGAACCTGTTT  
 6 MT492032.1 CGAATAAATAATATAAGATTTTGATTATTACCCCCATCATTAAACCCCTTTTAATTTCAAGAAGAATCGTTGAAAATGGAGCAGGAACCTGGTTGAACCTGTTT  
 7 MT492033.1 CGAATAAATAATATAAGATTTTGATTATTACCCCCATCATTAAACCCCTTTTAATTTCAAGAAGAATCGTTGAAAATGGAGCAGGAACCTGGTTGAACCTGTTT  
 8 MT492034.1 CGAATAAATAATATAAGATTTTGATTATTACCCCCATCATTAAACCCCTTTTAATTTCAAGAAGAATCGTTGAAAATGGAGCAGGAACCTGGTTGAACCTGTTT  
 9 MT492035.1 CGAATAAATAATATAAGATTTTGATTATTACCCCCATCATTAAACCCCTTTTAATTTCAAGAAGAATCGTTGAAAATGGAGCAGGAACCTGGTTGAACCTGTTT

1 2100

2101

Y P P L S S N I A H G G S S V D L A I F S L H L A G I S S I L G A I  
 1 MN793322.1 ACCCCCCACTTTCATCTAATATTGCTCATGGAGGTAGATCTGTAGACCTAGCTATTTTTTCATTACATTTAGCTGGTATTTCTTCAATTTTAGGAGCAAT  
 2 MT492036.1 ACCCCCCACTTTCATCTAATATTGCTCATGGAGGTAGATCTGTAGACCTAGCTATTTTTTCATTACATTTAGCTGGTATTTCTTCAATTTTAGGAGCAAT  
 3 MT492037.1 ACCCCCCACTTTCATCTAATATTGCTCATGGAGGTAGATCTGTAGACCTAGCTATTTTTTCATTACATTTAGCTGGTATTTCTTCAATTTTAGGAGCAAT  
 4 MT492030.1 ACCCCCCACTTTCATCTAATATTGCTCATGGAGGTAGATCTGTAGACCTAGCTATTTTTTCATTACATTTAGCTGGTATTTCTTCAATTTTAGGAGCAAT  
 5 MT492031.1 ACCCCCCACTTTCATCTAATATTGCTCATGGAGGTAGATCTGTAGACCTAGCTATTTTTTCATTACATTTAGCTGGTATTTCTTCAATTTTAGGAGCAAT  
 6 MT492032.1 ACCCCCCACTTTCATCTAATATTGCTCATGGAGGTAGATCTGTAGACCTAGCTATTTTTTCATTACATTTAGCTGGTATTTCTTCAATTTTAGGAGCAAT  
 7 MT492033.1 ACCCCCCACTTTCATCTAATATTGCTCATGGAGGTAGATCTGTAGACCTAGCTATTTTTTCATTACATTTAGCTGGTATTTCTTCAATTTTAGGAGCAAT  
 8 MT492034.1 ACCCCCCACTTTCATCTAATATTGCTCATGGAGGTAGATCTGTAGACCTAGCTATTTTTTCATTACATTTAGCTGGTATTTCTTCAATTTTAGGAGCAAT  
 9 MT492035.1 ACCCCCCACTTTCATCTAATATTGCTCATGGAGGTAGATCTGTAGACCTAGCTATTTTTTCATTACATTTAGCTGGTATTTCTTCAATTTTAGGAGCAAT

2 2200

2201

N F I T T I I N M R I N G M S F D Q M P L F V W S V G I T A L L L  
 1 MN793322.1 TAACTTCATTACAACAATTATTAACATACGAATTAACGGAATATCTTTTGATCAAATACCATTATTTGTATGATCTGTAGGAATTACAGCATTATTATTA  
 2 MT492036.1 TAACTTCATTACAACAATTATTAACATACGAATTAACGGAATATCTTTTGATCAAATACCATTATTTGTATGATCTGTAGGAATTACAGCATTATTATTA  
 3 MT492037.1 TAACTTCATTACAACAATTATTAACATACGAATTAACGGAATATCTTTTGATCAAATACCATTATTTGTATGATCTGTAGGAATTACAGCATTATTATTA  
 4 MT492030.1 TAACTTCATTACAACAATTATTAACATACGAATTAACGGAATATCTTTTGATCAAATACCATTATTTGTATGATCTGTAGGAATTACAGCATTATTATTA  
 5 MT492031.1 TAACTTCATTACAACAATTATTAACATACGAATTAACGGAATATCTTTTGATCAAATACCATTATTTGTATGATCTGTAGGAATTACAGCATTATTATTA  
 6 MT492032.1 TAACTTCATTACAACAATTATTAACATACGAATTAACGGAATATCTTTTGATCAAATACCATTATTTGTATGATCTGTAGGAATTACAGCATTATTATTA  
 7 MT492033.1 TAACTTCATTACAACAATTATTAACATACGAATTAACGGAATATCTTTTGATCAAATACCATTATTTGTATGATCTGTAGGAATTACAGCATTATTATTA  
 8 MT492034.1 TAACTTCATTACAACAATTATTAACATACGAATTAACGGAATATCTTTTGATCAAATACCATTATTTGTATGATCTGTAGGAATTACAGCATTATTATTA  
 9 MT492035.1 TAACTTCATTACAACAATTATTAACATACGAATTAACGGAATATCTTTTGATCAAATACCATTATTTGTATGATCTGTAGGAATTACAGCATTATTATTA

3 2300

2301

L L S L P V L A G A I T M L L T D R N L N T S F F D P A G G G D P  
 1 MN793322.1 TTATTATCACTTCCTGTTTTAGCTGGAGCTATCACTATATTATTAACAGATCGAAATTTAAATACATCATTTTTTGTATCCTGCTGGAGGGGGAGATCCTA  
 2 MT492036.1 TTATTATCACTTCCTGTTTTAGCTGGAGCTATCACTATATTATTAACAGATCGAAATTTAAATACATCATTTTTTGTATCCTGCTGGAGGGGGAGATCCTA  
 3 MT492037.1 TTATTATCACTTCCTGTTTTAGCTGGAGCTATCACTATATTATTAACAGATCGAAATTTAAATACATCATTTTTTGTATCCTGCTGGAGGGGGAGATCCTA  
 4 MT492030.1 TTATTATCACTTCCTGTTTTAGCTGGAGCTATCACTATATTATTAACAGATCGAAATTTAAATACATCATTTTTTGTATCCTGCTGGAGGGGGAGATCCTA  
 5 MT492031.1 TTATTATCACTTCCTGTTTTAGCTGGAGCTATCACTATATTATTAACAGATCGAAATTTAAATACATCATTTTTTGTATCCTGCTGGAGGGGGAGATCCTA  
 6 MT492032.1 TTATTATCACTTCCTGTTTTAGCTGGAGCTATCACTATATTATTAACAGATCGAAATTTAAATACATCATTTTTTGTATCCTGCTGGAGGGGGAGATCCTA  
 7 MT492033.1 TTATTATCACTTCCTGTTTTAGCTGGAGCTATCACTATATTATTAACAGATCGAAATTTAAATACATCATTTTTTGTATCCTGCTGGAGGGGGAGATCCTA  
 8 MT492034.1 TTATTATCACTTCCTGTTTTAGCTGGAGCTATCACTATATTATTAACAGATCGAAATTTAAATACATCATTTTTTGTATCCTGCTGGAGGGGGAGATCCTA  
 9 MT492035.1 TTATTATCACTTCCTGTTTTAGCTGGAGCTATCACTATATTATTAACAGATCGAAATTTAAATACATCATTTTTTGTATCCTGCTGGAGGGGGAGATCCTA

4 2400

2401 . . . . . : . . . . . 5 2500

1 MN793322.1 I L Y Q H L F W F F G H P E V Y I L I L P G F G M I S H I I S Q E  
 TTTTATATCAACATTTATTTTGATTTTTGGACATCCAGAAGTTTATATTTTAATTTTACCAGGATTTGGTATAAATTCACATATTATT TCACAAGAAA  
 2 MT492036.1 TTTTATATCAACATTTATTTTGATTTTTGGACATCCAGAAGTTTATATTTTAATTTTACCAGGATTTGGTATAAATTCACATATTATT TCACAAGAAA  
 3 MT492037.1 TTTTATATCAACATTTATTTTGATTTTTGGACATCCAGAAGTTTATATTTTAATTTTACCAGGATTTGGTATAAATTCACATATTATT TCACAAGAAA  
 4 MT492030.1 TTTTATATCAACATTTATTTTGATTTTTGGACATCCAGAAGTTTATATTTTAATTTTACCAGGATTTGGTATAAATTCACATATTATT TCACAAGAAA  
 S M L L S  
 5 MT492031.1 TTTTATATCAACATTTATTTTGATTTTTGGACATCCAGAAGTTTATATTTTAATTTTACCAGGATTTGGTATAAATTC CATATTATTATCACAAGAAA  
 6 MT492032.1 TTTTATATCAACATTTATTTTGATTTTTGGACATCCAGAAGTTTATATTTTAATTTTACCAGGATTTGGTATAAATTC CATATTATTATCACAAGAAA  
 7 MT492033.1 TTTTATATCAACATTTATTTTGATTTTTGGACATCCAGAAGTTTATATTTTAATTTTACCAGGATTTGGTATAAATTC CATATTATTATCACAAGAAA  
 8 MT492034.1 TTTTATATCAACATTTATTTTGATTTTTGG CATCCAGAAGTTTATATTTTAATTTTACCAGGATTTGGTATAAATTC CATATTATTATCACAAGAAA  
 9 MT492035.1 TTTTATATCAACATTTATTTTGATTTTTGGACATCCAGAAGTTTATATTTTAATTTTACCAGGATTTGGTATAAATTCACATATTATT TCACAAGAAA

2501 . . . . . : . . . . . 6 2600

1 MN793322.1 S G K K E T F G S L G M I Y A M M A I G L L G F V V W A H H M F T V  
 GAGGAAAAAAGAAACATTTGGATCTTTAGGAATAATTTATGCTATAATAGCAATTTGGTTTATTAGGATTTGTAGTATGAGCTCATCATATATTTACAGT  
 2 MT492036.1 GAGGAAAAAAGAAACATTTGGATCTTTAGGAATAATTTATGCTATAATAGCAATTTGGTTTATTAGGATTTGTAGTATGAGCTCATCATATATTTACAGT  
 3 MT492037.1 GAGGAAAAAAGAAACATTTGGATCTTTAGGAATAATTTATGCTATAATAGCAATTTGGTTTATTAGGATTTGTAGTATGAGCTCATCATATATTTACAGT  
 4 MT492030.1 GAGGAAAAAAGAAACATTTGGATCTTTAGGAATAATTTATGCTATAATAGCAATTTGGTTTATTAGGATTTGTAGTATGAGCTCATCATATATTTACAGT  
 5 MT492031.1 GAGGAAAAAAGAAACATTTGGATCTTTAGGAATAATTTATGCTATAATAGCAATTTGGTTTATTAGGATTTGTAGTATGAGCTCATCATATATTTACAGT  
 6 MT492032.1 GAGGAAAAAAGAAACATTTGGATCTTTAGGAATAATTTATGCTATAATAGCAATTTGGTTTATTAGGATTTGTAGTATGAGCTCATCATATATTTACAGT  
 7 MT492033.1 GAGGAAAAAAGAAACATTTGGATCTTTAGGAATAATTTATGCTATAATAGCAATTTGGTTTATTAGGATTTGTAGTATGAGCTCATCATATATTTACAGT  
 8 MT492034.1 GAGGAAAAAAGAAACATTTGGATCTTTAGGAATAATTTATGCTATAATAGCAATTTGGTTTATTAGGATTTGTAGTATGAGCTCATCATATATTTACAGT  
 9 MT492035.1 GAGGAAAAAAGAAACATTTGGATCTTTAGGAATAATTTATGCTATAATAGCAATTTGGTTTATTAGGATTTGTAGTATGAGCTCATCATATATTTACAGT

2601 . . . . . : . . . . . 7 2700

1 MN793322.1 G M D I D T R A Y F T S A T M I I A V P T G I K I F S W L A T L H  
 AGGAATAGACATCGATACACGAGCTTACTTTACCTCAGCAACAATAATTTATGCTGTTCCAACAGGAATTTAAAATTTTATAGTTGATTAGCAACCTTACAT  
 2 MT492036.1 AGGAATAGACATCGATACACGAGCTTACTTTACCTCAGCAACAATAATTTATGCTGTTCCAACAGGAATTTAAAATTTTATAGTTGATTAGCAACCTTACAT  
 3 MT492037.1 AGGAATAGACATCGATACACGAGCTTACTTTACCTCAGCAACAATAATTTATGCTGTTCCAACAGGAATTTAAAATTTTATAGTTGATTAGCAACCTTACAT  
 4 MT492030.1 AGGAATAGACATCGATACACGAGCTTACTTTACCTCAGCAACAATAATTTATGCTGTTCCAACAGGAATTTAAAATTTTATAGTTGATTAGCAACCTTACAT  
 5 MT492031.1 AGGAATAGACATCGATACACGAGCTTACTTTACCTCAGCAACAATAATTTATGCTGTTCCAACAGGAATTTAAAATTTTATAGTTGATTAGCAACCTTACAT  
 6 MT492032.1 AGGAATAGACATCGATACACGAGCTTACTTTACCTCAGCAACAATAATTTATGCTGTTCCAACAGGAATTTAAAATTTTATAGTTGATTAGCAACCTTACAT  
 7 MT492033.1 AGGAATAGACATCGATACACGAGCTTACTTTACCTCAGCAACAATAATTTATGCTGTTCCAACAGGAATTTAAAATTTTATAGTTGATTAGCAACCTTACAT  
 8 MT492034.1 AGGAATAGACATCGATACACGAGCTTACTTTACCTCAGCAACAATAATTTATGCTGTTCCAACAGGAATTTAAAATTTTATAGTTGATTAGCAACCTTACAT  
 9 MT492035.1 AGGAATAGACATCGATACACGAGCTTACTTTACCTCAGCAACAATAATTTATGCTGTTCCAACAGGAATTTAAAATTTTATAGTTGATTAGCAACCTTACAT

2701 . . . . . : . . . . . 8 2800

1 MN793322.1 G T Q I N Y S P S I L W S L G F V F L F T V G G L T G V V L A N S  
 GGAACTCAAATTAATTATAGACCTTCAATTCCTTTGAAGATTAGGATTTGTATTTTTATTCACTGTTGGTGGATTAACAGGAGTTGTATTAGCTAATTCAT  
 2 MT492036.1 GGAACTCAAATTAATTATAGACCTTCAATTCCTTTGAAGATTAGGATTTGTATTTTTATTCACTGTTGGTGGATTAACAGGAGTTGTATTAGCTAATTCAT  
 3 MT492037.1 GGAACTCAAATTAATTATAGACCTTCAATTCCTTTGAAGATTAGGATTTGTATTTTTATTCACTGTTGGTGGATTAACAGGAGTTGTATTAGCTAATTCAT  
 4 MT492030.1 GGAACTCAAATTAATTATAGACCTTCAATTCCTTTGAAGATTAGGATTTGTATTTTTATTCACTGTTGGTGGATTAACAGGAGTTGTATTAGCTAATTCAT  
 5 MT492031.1 GGAACTCAAATTAATTATAGACCTTCAATTCCTTTGAAGATTAGGATTTGTATTTTTATTCACTGTTGGTGGATTAACAGGAGTTGTATTAGCTAATTCAT  
 6 MT492032.1 GGAACTCAAATTAATTATAGACCTTCAATTCCTTTGAAGATTAGGATTTGTATTTTTATTCACTGTTGGTGGATTAACAGGAGTTGTATTAGCTAATTCAT  
 7 MT492033.1 GGAACTCAAATTAATTATAGACCTTCAATTCCTTTGAAGATTAGGATTTGTATTTTTATTCACTGTTGGTGGATTAACAGGAGTTGTATTAGCTAATTCAT  
 8 MT492034.1 GGAACTCAAATTAATTATAGACCTTCAATTCCTTTGAAGATTAGGATTTGTATTTTTATTCACTGTTGGTGGATTAACAGGAGTTGTATTAGCTAATTCAT  
 9 MT492035.1 GGAACTCAAATTAATTATAGACCTTCAATTCCTTTGAAGATTAGGATTTGTATTTTTATTCACTGTTGGTGGATTAACAGGAGTTGTATTAGCTAATTCAT

2801 . . . . . : . . . . . 9 2900

1 MN793322.1 S I D I A L H D T Y Y V V A H F H Y V L S M G A V F A I I A G F I H  
2 MT492036.1 CTATTGATATTGCCCTTCATGACACTTATTATGTAGTAGCCCACTTTCATTATGTATTATCTATAGGAGCTGTATTGCTATTATTGCTGGATTTATTCA  
3 MT492037.1 CTATTGATATTGCCCTTCATGACACTTATTATGTAGTAGCCCACTTTCATTATGTATTATCTATAGGAGCTGTATTGCTATTATTGCTGGATTTATTCA  
4 MT492030.1 CTATTGATATTGCCCTTCATGACACTTATTATGTAGTAGCCCACTTTCATTATGTATTATCTATAGGAGCTGTATTGCTATTATTGCTGGATTTATTCA  
5 MT492031.1 CTATTGATATTGCCCTTCATGACACTTATTATGTAGTAGCCCACTTTCATTATGTATTATCTATAGGAGCTGTATTGCTATTATTGCTGGATTTATTCA  
6 MT492032.1 CTATTGATATTGCCCTTCATGACACTTATTATGTAGTAGCCCACTTTCATTATGTATTATCTATAGGAGCTGTATTGCTATTATTGCTGGATTTATTCA  
7 MT492033.1 CTATTGATATTGCCCTTCATGACACTTATTATGTAGTAGCCCACTTTCATTATGTATTATCTATAGGAGCTGTATTGCTATTATTGCTGGATTTATTCA  
8 MT492034.1 CTATTGATATTGCCCTTCATGACACTTATTATGTAGTAGCCCACTTTCATTATGTATTATCTATAGGAGCTGTATTGCTATTATTGCTGGATTTATTCA  
9 MT492035.1 CTATTGATATTGCCCTTCATGACACTTATTATGTAGTAGCCCACTTTCATTATGTATTATCTATAGGAGCTGTATTGCTATTATTGCTGGATTTATTCA

+ HaeIII (GGCC)  
Ref position 2,554

2901 . . . . . : . . . . . 0 3000

1 MN793322.1 W Y P L F T G L S L N P Y F L K I Q F F T M F I G V N L T F F P Q  
2 MT492036.1 CTGATATCCCTATTTACAGGATTAAGCTTAAATCCTTATTTTTTAAAAATTC AATTTTTTACAATATTTATTGGAGTAAATTTAACTTTCTTCCACAA  
3 MT492037.1 CTGATATCCCTATTTACAGGATTAAGCTTAAATCCTTATTTTTTAAAAATTC AATTTTTTACAATATTTATTGGAGTAAATTTAACTTTCTTCCACAA  
4 MT492030.1 CTGATATCCCTATTTACAGGATTAAGCTTAAATCCTTATTTTTTAAAAATTC AATTTTTTACAATATTTATTGGAGTAAATTTAACTTTCTTCCACAA  
5 MT492031.1 CTGATATCCCTATTTACAGGATTAAGCTTAAATCCTTATTTTTTAAAAATTC AATTTTTTACAATATTTATTGGAGTAAATTTAACTTTCTTCCACAA  
6 MT492032.1 CTGATATCCCTATTTACAGGATTAAGCTTAAATCCTTATTTTTTAAAAATTC AATTTTTTACAATATTTATTGGAGTAAATTTAACTTTCTTCCACAA  
7 MT492033.1 CTGATATCCCTATTTACAGGATTAAGCTTAAATCCTTATTTTTTAAAAATTC AATTTTTTACAATATTTATTGGAGTAAATTTAACTTTCTTCCACAA  
8 MT492034.1 CTGATATCCCTATTTACAGGATTAAGCTTAAATCCTTATTTTTTAAAAATTC AATTTTTTACAATATTTATTGGAGTAAATTTAACTTTCTTCCACAA  
9 MT492035.1 CTGATATCCCTATTTACAGGATTAAGCTTAAATCCTTATTTTTTAAAAATTC AATTTTTTACAATATTTATTGGAGTAAATTTAACTTTCTTCCACAA

3001 . . . . . : . . . . . 1 3100

1 MN793322.1 H F L G L A G M P R R Y S D Y P D A Y I S W N I I S S L G S Y I S  
2 MT492036.1 CATTTCCTAGGGCTAGCTGGTATACCTCGACGATATTCAGATTATCCAGATGCCTATATTTTCATGAAATATTATCTCATCATTAGGGTCATATATTTCTT  
3 MT492037.1 CATTTCCTAGGGCTAGCTGGTATACCTCGACGATATTCAGATTATCCAGATGCCTATATTTTCATGAAATATTATCTCATCATTAGGGTCATATATTTCTT  
4 MT492030.1 CATTTCCTAGGGCTAGCTGGTATACCTCGACGATATTCAGATTATCCAGATGCCTATATTTTCATGAAATATTATCTCATCATTAGGGTCATATATTTCTT  
5 MT492031.1 CATTTCCTAGGGCTAGCTGGTATACCTCGACGATATTCAGATTATCCAGATGCCTATATTTTCATGAAATATTATCTCATCATTAGGGTCATATATTTCTT  
6 MT492032.1 CATTTCCTAGGGCTAGCTGGTATACCTCGACGATATTCAGATTATCCAGATGCCTATATTTTCATGAAATATTATCTCATCATTAGGGTCATATATTTCTT  
7 MT492033.1 CATTTCCTAGGGCTAGCTGGTATACCTCGACGATATTCAGATTATCCAGATGCCTATATTTTCATGAAATATTATCTCATCATTAGGGTCATATATTTCTT  
8 MT492034.1 CATTTCCTAGGGCTAGCTGGTATACCTCGACGATATTCAGATTATCCAGATGCCTATATTTTCATGAAATATTATCTCATCATTAGGGTCATATATTTCTT  
9 MT492035.1 CATTTCCTAGGGCTAGCTGGTATACCTCGACGATATTCAGATTATCCAGATGCCTATATTTTCATGAAATATTATCTCATCATTAGGGTCATATATTTCTT

3101 . . . . . : . . . . . 2 3200

1 MN793322.1 L L A V M L I L I I I W E S M I N Q R M I L F S L N L T S S I E W Y  
2 MT492036.1 TACTAGCAGTGATATTAATTTAATTATTTGAGAATCTATAATTAATCAACGTATAAATCTTATTTTCATTAATTTAACATCATCAATTGAATGATA  
3 MT492037.1 TACTAGCAGTGATATTAATTTAATTATTTGAGAATCTATAATTAATCAACGTATAAATCTTATTTTCATTAATTTAACATCATCAATTGAATGATA  
4 MT492030.1 TACTAGCAGTGATATTAATTTAATTATTTGAGAATCTATAATTAATCAACGTATAAATCTTATTTTCATTAATTTAACATCATCAATTGAATGATA  
5 MT492031.1 TACTAGCAGTGATATTAATTTAATTATTTGAGAATCTATAATTAATCAACGTATAAATCTTATTTTCATTAATTTAACATCATCAATTGAATGATA  
6 MT492032.1 TACTAGCAGTGATATTAATTTAATTATTTGAGAATCTATAATTAATCAACGTATAAATCTTATTTTCATTAATTTAACATCATCAATTGAATGATA  
7 MT492033.1 TACTAGCAGTGATATTAATTTAATTATTTGAGAATCTATAATTAATCAACGTATAAATCTTATTTTCATTAATTTAACATCATCAATTGAATGATA  
8 MT492034.1 TACTAGCAGTGATATTAATTTAATTATTTGAGAATCTATAATTAATCAACGTATAAATCTTATTTTCATTAATTTAACATCATCAATTGAATGATA  
9 MT492035.1 TACTAGCAGTGATATTAATTTAATTATTTGAGAATCTATAATTAATCAACGTATAAATCTTATTTTCATTAATTTAACATCATCAATTGAATGATA

+  
Ref position 2,829

| tRNA-Leu (UAA) ->

3201 Q N L P P A E H S Y N E L P I L S N F \* 3 3300

tctaatatggcagattatatgtaatggatttaaacccatttat

1 MN793322.1 TCAAAATCTACCACCAGCAGAACATTCATATAACGAACTTCCAATTTTAAGAAATTC TAAATATGGCAGATTATATGTAATGGATTAAACCCCATTTAT
2 MT492036.1 TCAAAATCTACCACCAGCAGAACATTCATATAACGAACTTCCAATTTTAAGAAATTC TAAATATGGCAGATTATATGTAATGGATTAAACCCCATTTAT
3 MT492037.1 TCAAAATCTACCACCAGCAGAACATTCATATAACGAACTTCCAATTTTAAGAAATTC TAAATATGGCAGATTATATGTAATGGATTAAACCCCATTTAT
4 MT492030.1 TCAAAATCTACCACCAGCAGAACATTCATATAACGAACTTCCAATTTTAAGAAATTC TAAATATGGCAGATTATATGTAATGGATTAAACCCCATTTAT
5 MT492031.1 TCAAAA C TACCACCAGCAGAACATTCATATAACGAACTTCCAATTTTAAGAAATTC TAAATATGGCAGATTATATGTAATGGATTAAACCCCATTTAT
6 MT492032.1 TCAAAATCTACCACCAGCAGAACATTCATATAACGAACTTCCAATTTTAAGAAATTC TAAATATGGCAGATTATATGTAATGGATTAAACCCCATTTAT
7 MT492033.1 TCAAAATCTACCACCAGCAGAACATTCATATAACGAACTTCCAATTTTAAGAAATTC TAAATATGGCAGATTATATGTAATGGATTAAACCCCATTTAT
8 MT492034.1 TCAAAATCTACCACCAGCAGAACATTCATATAACGAACTTCCAATTTTAAGAAATTC TAAATATGGCAGATTATATGTAATGGATTAAACCCCATTTAT
9 MT492035.1 TCAAAATCTACCACCAGCAGAACATTCATATAACGAACTTCCAATTTTAAGAAATTC TAAATATGGCAGATTATATGTAATGGATTAAACCCCATTTAT

| COII ->

3301 aaaggattatccttttttagaa M A T W S N F S L Q N S A S P L M E Q I I F F Y D H 4 3400

1 MN793322.1 AAAGGATTATCCTTTTTTTAGAA ATA GCAACTTGATCTAATTTTAGTCTACAAAATAGAGCCTCTCCATTAATAGAACAAATTATTTTTTTTATGATCA
2 MT492036.1 AAAGGATTATCCTTTTTTTAGAA ATA GCAACTTGATCTAATTTTAGTCTACAAAATAGAGCCTCTCCATTAATAGAACAAATTATTTTTTTTATGATCA
3 MT492037.1 AAAGGATTATCCTTTTTTTAGAA ATA GCAACTTGATCTAATTTTAGTCTACAAAATAGAGCCTCTCCATTAATAGAACAAATTATTTTTTTTATGATCA
4 MT492030.1 AAAGGATTATCCTTTTTTTAGAA ATA GCAACTTGATCTAATTTTAGTCTACAAAATAGAGCCTCTCCATTAATAGAACAAATTATTTTTTTTATGATCA
5 MT492031.1 AAAGGATTATCCTTTTTTTAGAA ATA GCAACTT CATCTAATTTTAGTCTACAAAATAGAGCCTCTCCATTAATAGAACAAATTATTTTTTTTATGATCA
6 MT492032.1 AAAGGATTATCCTTTTTTTAGAA ATA GCAACTTGATCTAATTTTAGTCTACAAAATAGAGCCTCTCCATTAATAGAACAAATTATTTTTTTTATGATCA
7 MT492033.1 AAAGGATTATCCTTTTTTTAGAA ATA GCAACTTGATCTAATTTTAGTCTACAAAATAGAGCCTCTCCATTAATAGAACAAATTATTTTTTTTATGATCA
8 MT492034.1 AAAGGATTATCCTTTTTTTAGAA ATA GCAACTT CATCTAATTTTAGTCTACAAAATAGAGCCTCTCCATTAATAGAACAAATTATTTTTTTTATGATCA
9 MT492035.1 AAAGGATTATCCTTTTTTTAGAA ATA GCAACTTGATCTAATTTTAGTCTACAAAATAGAGCCTCTCCATTAATAGAACAAATTATTTTTTTTATGATCA

+ Sau3AI (GATC)
Ref position 3,050

3401 T L I I L V M I T I L V G Y L M S L F F N K Y I N R F L L E G Q 5 3500

1 MN793322.1 TACATTAATTATTTTAGTTATAAATTACAATTTTAGTAGGATATTTAATAATAAGATTATTTTTTAATAAATATATTAATCGATTCTACTTGAAGGTCAA
2 MT492036.1 TACATTAATTATTTTAGTTATAAATTACAATTTTAGTAGGATATTTAATAATAAGATTATTTTTTAATAAATATATTAATCGATTCTACTTGAAGGTCAA
3 MT492037.1 TACATTAATTATTTTAGTTATAAATTACAATTTTAGTAGGATATTTAATAATAAGATTATTTTTTAATAAATATATTAATCGATTCTACTTGAAGGTCAA
4 MT492030.1 TACATTAATTATTTTAGTTATAAATTACAATTTTAGTAGGATATTTAATAATAAGATTATTTTTTAATAAATATATTAATCGATTCTACTTGAAGGTCAA
5 MT492031.1 TACATTAATTATTTTAGTTATAAATTACAATTTTAGTAGGATATTTAATAATAAGATTATTTTTTAATAAATATATTAATCGATTCTACTTGAAGGTCAA
6 MT492032.1 TACATTAATTATTTTAGTTATAAATTACAATTTTAGTAGGATATTTAATAATAAGATTATTTTTTAATAAATATATTAATCGATTCTACTTGAAGGTCAA
7 MT492033.1 TACATTAATTATTTTAGTTATAAATTACAATTTTAGTAGGATATTTAATAATAAGATTATTTTTTAATAAATATATTAATCGATTCTACTTGAAGGTCAA
8 MT492034.1 TACATTAATTATTTTAGTTATAAATTACAATTTTAGTAGGATATTTAATAATAAGATTATTTTTTAATAAATATATTAATCGATTCTACTTGAAGGTCAA
9 MT492035.1 TACATTAATTATTTTAGTTATAAATTACAATTTTAGTAGGATATTTAATAATAAGATTATTTTTTAATAAATATATTAATCGATTCTACTTGAAGGTCAA

3501 M I E L I W T I I P A I T L I F I A L P S L R L L Y L L D E L N K 6 3600

1 MN793322.1 ATAATTGAATTAATTTGAACAATTATTCAGCTATCACATTAATCTTTATTGCTTTACCATCAGCTTCGATTATTATATTTACTAGATGAATTAAATAAAC
2 MT492036.1 ATAATTGAATTAATTTGAACAATTATTCAGCTATCACATTAATCTTTATTGCTTTACCATCAGCTTCGATTATTATATTTACTAGATGAATTAAATAAAC
3 MT492037.1 ATAATTGAATTAATTTGAACAATTATTCAGCTATCACATTAATCTTTATTGCTTTACCATCAGCTTCGATTATTATATTTACTAGATGAATTAAATAAAC
4 MT492030.1 ATAATTGAATTAATTTGAACAATTATTCAGCTATCACATTAATCTTTATTGCTTTACCATCAGCTTCGATTATTATATTTACTAGATGAATTAAATAAAC
5 MT492031.1 ATAATTGAATTAATTTGAAC TATTAT ACCAGCTATCACATTAATCTTTATTGCTTTACCATCAGCTTCGATTATTATATTTACTAGATGAATTAAATAAAC
6 MT492032.1 ATAATTGAATTAATTTGAACAATTATTCAGCTATCACATTAATCTTTATTGCTTTACCATCAGCTTCGATTATTATATTTACTAGATGAATTAAATAAAC
7 MT492033.1 ATAATTGAATTAATTTGAACAATTATTCAGCTATCACATTAATCTTTATTGCTTTACCATCAGCTTCGATTATTATATTTACTAGATGAATTAAATAAAC
8 MT492034.1 ATAATTGAATTAATTTGAAC TATTAT ACCAGCTATCACATTAATCTTTATTGCTTTACCATCAGCTTCGATTATTATATTTACTAGATGAATTAAATAAAC
9 MT492035.1 ATAATTGAATTAATTTGAACAATTATTCAGCTATCACATTAATCTTTATTGCTTTACCATCAGCTTCGATTATTATATTTACTAGATGAATTAAATAAAC

3601

7 3700

P L I T L K S I G H Q W Y W S Y E Y S D F N N I E F D S Y M T P M N  
 1 MN793322.1 CATTAATTACATTAATAATCAATTGGACATCAATGATATTGAAGTTATGAATATTCAGATTTAATAACATTGAATTTGATTCTTATATAACCCCTATAAA  
 2 MT492036.1 CATTAATTACATTAATAATCAATTGGACATCAATGATATTGAAGTTATGAATATTCAGATTTAATAACATTGAATTTGATTCTTATATAACCCCTATAAA  
 3 MT492037.1 CATTAATTACATTAATAATCAATTGGACATCAATGATATTGAAGTTATGAATATTCAGATTTAATAAATTATTGAATTTGATTCTTATATAACCCCTATAAA  
 4 MT492030.1 CATTAATTACATTAATAATCAATTGGACATCAATGATATTGAAGTTATGAATATTCAGATTTAATAACATTGAATTTGATTCTTATATAACCCCTATAAA  
 5 MT492031.1 CATTAATTACATTAATAATCAATTGGACATCAATGATATTGAAGTTATGAATATTCAGATTTAATAACATTGAATTTGATTCTTATATAACCCCTATAAA  
 6 MT492032.1 CATTAATTACATTAATAATCAATTGGACATCAATGATATTGAAGTTATGAATATTCAGATTTAATAAATTATTGAATTTGATTCTTATATAACCCCTATAAA  
 7 MT492033.1 CATTAATTACATTAATAATCAATTGGACATCAATGATATTGAAGTTATGAATATTCAGATTTAATAAATTATTGAATTTGATTCTTATATAACCCCTATAAA  
 8 MT492034.1 CATTAATTACATTAATAATCAATTGGACATCAATGATATTGAAGTTATGAATATTCAGATTTAATAAATTATTGAATTTGATTCTTATATAACCCCTATAAA  
 9 MT492035.1 CATTAATTACATTAATAATCAATTGGACATCAATGATATTGAAGTTATGAATATTCAGATTTAATAAATTATTGAATTTGATTCTTATATAACCCCTATAAA

3701

8 3800

E M N K N N F R L L E V D N R I I L P M N N Q I Q I M V T A T D V  
 1 MN793322.1 TGAAATAAATAAAAAATAATTTTCGTCCTTTTAGAAGTAGATAATCGAATTATTTTACCAATAAATAACCAAATTCAAATTATAGTTACCGCAACAGATGTT  
 2 MT492036.1 TGAAATAAATAAAAAATAATTTTCGTCCTTTTAGAAGTAGATAATCGAATTATTTTACCAATAAATAACCAAATTCAAATTATAGTTACCGCAACAGATGTT  
 3 MT492037.1 TGAAATAAATAAAAAATAATTTTCGTCCTTTTAGAAGTAGATAATCGAATTATTTTACCAATAAATAACCAAATTCAAATTATAGTTACCGCAACAGATGTT  
 4 MT492030.1 TGAAATAAATAAAAAATAATTTTCGTCCTTTTAGAAGTAGATAATCGAATTATTTTACCAATAAATAACCAAATTCAAATTATAGTTACCGCAACAGATGTT  
 5 MT492031.1 TGAAATAAATAAAAAATAATTTTCGTCCTTTTAGAAGTAGATAATCGAATTATTTTACCAATAAATAACCAAATTCAAATTATAGTTACCGCAACAGATGTT  
 6 MT492032.1 TGAAATAAATAAAAAATAATTTTCGTCCTTTTAGAAGTAGATAATCGAATTATTTTACCAATAAATAACCAAATTCAAATTATAGTTACCGCAACAGATGTT  
 7 MT492033.1 TGAAATAAATAAAAAATAATTTTCGTCCTTTTAGAAGTAGATAATCGAATTATTTTACCAATAAATAACCAAATTCAAATTATAGTTACCGCAACAGATGTT  
 8 MT492034.1 TGAAATAAATAAAAAATAATTTTCGTCCTTTTAGAAGTAGATAATCGAATTATTTTACCAATAAATAACCAAATTCAAATTATAGTTACCGCAACAGATGTT  
 9 MT492035.1 TGAAATAAATAAAAAATAATTTTCGTCCTTTTAGAAGTAGATAATCGAATTATTTTACCAATAAATAACCAAATTCAAATTATAGTTACCGCAACAGATGTT

3801

9 3900

I H S W T I P S L G V K V D A N P G R L N Q T N F F I N R P G I F  
 1 MN793322.1 ATTCATTCATGAACATATCCCATCATTAGGAGTAAAAGTAGATGCTAATCCAGGTCGCCTAAATCAAACATAATTTTTTATTAATCGACCTGGAATTTTTT  
 2 MT492036.1 ATTCATTCATGAACATATCCCATCATTAGGAGTAAAAGTAGATGCTAATCCAGGTCGCCTAAATCAAACATAATTTTTTATTAATCGACCTGGAATTTTTT  
 3 MT492037.1 ATTCATTCATGAACATATCCCATCATTAGGAGTAAAAGTAGATGCTAATCCAGGTCGCCTAAATCAAACATAATTTTTTATTAATCGACCTGGAATTTTTT  
 4 MT492030.1 ATTCATTCATGAACATATCCCATCATTAGGAGTAAAAGTAGATGCTAATCCAGGTCGCCTAAATCAAACATAATTTTTTATTAATCGACCTGGAATTTTTT  
 5 MT492031.1 ATTCATTCATGAACATATCCCATCATTAGGAGTAAAAGTAGATGCTAATCCAGGTCGCCTAAATCAAACATAATTTTTTATTAATCGACCTGGAATTTTTT  
 6 MT492032.1 ATTCATTCATGAACATATCCCATCATTAGGAGTAAAAGTAGATGCTAATCCAGGTCGCCTAAATCAAACATAATTTTTTATTAATCGACCTGGAATTTTTT  
 7 MT492033.1 ATTCATTCATGAACATATCCCATCATTAGGAGTAAAAGTAGATGCTAATCCAGGTCGCCTAAATCAAACATAATTTTTTATTAATCGACCTGGAATTTTTT  
 8 MT492034.1 ATTCATTCATGAACATATCCCATCATTAGGAGTAAAAGTAGATGCTAATCCAGGTCGCCTAAATCAAACATAATTTTTTATTAATCGACCTGGAATTTTTT  
 9 MT492035.1 ATTCATTCATGAACATATCCCATCATTAGGAGTAAAAGTAGATGCTAATCCAGGTCGCCTAAATCAAACATAATTTTTTATTAATCGACCTGGAATTTTTT

3901

0 4000

F G Q C S E I C G A N H S F M P I V I E S I S I K N F I N W I N N Y  
 1 MN793322.1 TCGGGCAATGTTTCAGAAATTTGCGGGAGCAAATCATAGATTTATACCTATTGTAATTGAAAGAATCTCAATTAATAAATTTTATTAATGAATTAATAATTA  
 2 MT492036.1 TCGGGCAATGTTTCAGAAATTTGCGGGAGCAAATCATAGATTTATACCTATTGTAATTGAAAGAATCTCAATTAATAAATTTTATTAATGAATTAATAATTA  
 3 MT492037.1 TCGGGCAATGTTTCAGAAATTTGCGGGAGCAAATCATAGATTTATACCTATTGTAATTGAAAGAATCTCAATTAATAAATTTTATTAATGAATTAATAATTA  
 4 MT492030.1 TCGGGCAATGTTTCAGAAATTTGCGGGAGCAAATCATAGATTTATACCTATTGTAATTGAAAGAATCTCAATTAATAAATTTTATTAATGAATTAATAATTA  
 5 MT492031.1 TCGGGCAATGTTTCAGAAATTTGCGGGAGCAAATCATAGATTTATACCTATTGTAATTGAAAGAATCTCAATTAATAAATTTTATTAATGAATTAATAATTA  
 6 MT492032.1 TCGGGCAATGTTTCAGAAATTTGCGGGAGCAAATCATAGATTTATACCTATTGTAATTGAAAGAATCTCAATTAATAAATTTTATTAATGAATTAATAATTA  
 7 MT492033.1 TCGGGCAATGTTTCAGAAATTTGCGGGAGCAAATCATAGATTTATACCTATTGTAATTGAAAGAATCTCAATTAATAAATTTTATTAATGAATTAATAATTA  
 8 MT492034.1 TCGGGCAATGTTTCAGAAATTTGCGGGAGCAAATCATAGATTTATACCTATTGTAATTGAAAGAATCTCAATTAATAAATTTTATTAATGAATTAATAATTA  
 9 MT492035.1 TCGGGCAATGTTTCAGAAATTTGCGGGAGCAAATCATAGATTTATACCTATTGTAATTGAAAGAATCTCAATTAATAAATTTTATTAATGAATTAATAATTA



4401

5 4500

Y S F W L I P N R Y F I F W N F I L N N L H K E F K M L L G K N S

1 MN793322.1 ATATTCATTTTGATTAATTCCTAATCGTTATTTATTTTTGAAATTTTATTTTAAATAAATCTTCATAAAGAATTTAAAAATATTATTAGGAAAAAATTCT

2 MT492036.1 ATATTCATTTTGATTAATTCCTAATCGTTATTTATTTTTGAAATTTTATTTTAAATAAATCTTCATAAAGAATTTAAAAATATTATTAGGAAAAAATTCT

3 MT492037.1 ATATTCATTTTGATTAATTCCTAATCGTTATTTATTTTTGAAATTTTATTTTAAATAAATCTTCATAAAGAATTTAAAAATATTATTAGGAAAAAATTCT

4 MT492030.1 ATATTCATTTTGATTAATTCCTAATCGTTATTTATTTTTGAAATTTTATTTTAAATAAATCTTCATAAAGAATTTAAAAATATTATTAGGAAAAAATTCT

5 MT492031.1 ATATTCATTTTGATTAATTCCTAATCGTTATTTATTTTTGAAATTTTATTTTAAATAAATCTTCATAAAGAATTTAAAAATATTATTAGGAAAAAATTCT

6 MT492032.1 ATATTCATTTTGATTAATTCCTAATCGTTATTTATTTTTGAAATTTTATTTTAAATAAATCTTCATAAAGAATTTAAAAATATTATTAGGAAAAAATTCT

7 MT492033.1 ATATTCATTTTGATTAATTCCTAATCGTTATTTATTTTTGAAATTTTATTTTAAATAAATCTTCATAAAGAATTTAAAAATATTATTAGGAAAAAATTCT

8 MT492034.1 ATATTCATTTTGATTAATTCCTAATCGTTATTTATTTTTGAAATTTTATTTTAAATAAATCTTCATAAAGAATTTAAAAATATTATTAGGAAAAAATTCT

9 MT492035.1 ATATTCATTTTGATTAATTCCTAATCGTTATTTATTTTTGAAATTTTATTTTAAATAAATCTTCATAAAGAATTTAAAAATATTATTAGGAAAAAATTCT

4501

6 4600

N G S T F I F I S M F T F I L F N N F L G L F P Y I F T S T S H L

1 MN793322.1 AATGGATCTACTTTTATTTTATTTCTATATTTACTTTTATTTTATTTAATAATTTTTTAGGGTTATCCCATATATTTTTACTAGAACTAGACATCTTA

2 MT492036.1 AATGGATCTACTTTTATTTTATTTCTATATTTACTTTTATTTTATTTAATAATTTTTTAGGGTTATCCCATATATTTTTACTAGAACTAGACATCTTA

3 MT492037.1 AATGGATCTACTTTTATTTTATTTCTATATTTACTTTTATTTTATTTAATAATTTTTTAGGGTTATCCCATATATTTTTACTAGAACTAGACATCTTA

4 MT492030.1 AATGGATCTACTTTTATTTTATTTCTATATTTACTTTTATTTTATTTAATAATTTTTTAGGGTTATCCCATATATTTTTACTAGAACTAGACATCTTA

5 MT492031.1 AATGGATCTACTTTTATTTTATTTCTATATTTACTTTTATTTTATTTAATAATTTTTTAGGGTTATCCCATATATTTTTACTAGAACTAGACATCTTA

6 MT492032.1 AATGGATCTACTTTTATTTTATTTCTATATTTACTTTTATTTTATTTAATAATTTTTTAGGGTTATCCCATATATTTTTACTAGAACTAGACATCTTA

7 MT492033.1 AATGGATCTACTTTTATTTTATTTCTATATTTACTTTTATTTTATTTAATAATTTTTTAGGGTTATCCCATATATTTTTACTAGAACTAGACATCTTA

8 MT492034.1 AATGGATCTACTTTTATTTTATTTCTATATTTACTTTTATTTTATTTAATAATTTTTTAGGGTTATCCCATATATTTTTACTAGAACTAGACATCTTA

9 MT492035.1 AATGGATCTACTTTTATTTTATTTCTATATTTACTTTTATTTTATTTAATAATTTTTTAGGGTTATCCCATATATTTTTACTAGAACTAGACATCTTA

4601

7 4700

T M S L S I S L P L W L S F M F Y G W L N N T Q H M F I H M I P Q G

1 MN793322.1 CTATGTCATTATCTATTTTCATTACCATTATGATTAAGATTTATATTTTACGGATGATTAATAAACAACACTCAACACATATTTTATTCATATAAATTCCTCAAGG

2 MT492036.1 CTATGTCATTATCTATTTTCATTACCATTATGATTAAGATTTATATTTTACGGATGATTAATAAACAACACTCAACACATATTTTATTCATATAAATTCCTCAAGG

3 MT492037.1 CTATGTCATTATCTATTTTCATTACCATTATGATTAAGATTTATATTTTACGGATGATTAATAAACAACACTCAACACATATTTTATTCATATAAATTCCTCAAGG

4 MT492030.1 CTATGTCATTATCTATTTTCATTACCATTATGATTAAGATTTATATTTTACGGATGATTAATAAACAACACTCAACACATATTTTATTCATATAAATTCCTCAAGG

5 MT492031.1 CTATGTCATTATCTATTTTCATTACCATTATGATTAAGATTTATATTTTACGGATGATTAATAAACAACACTCAACACATATTTTATTCATATAAATTCCTCAAGG

6 MT492032.1 CTATGTCATTATCTATTTTCATTACCATTATGATTAAGATTTATATTTTACGGATGATTAATAAACAACACTCAACACATATTTTATTCATATAAATTCCTCAAGG

7 MT492033.1 CTATGTCATTATCTATTTTCATTACCATTATGATTAAGATTTATATTTTACGGATGATTAATAAACAACACTCAACACATATTTTATTCATATAAATTCCTCAAGG

8 MT492034.1 CTATGTCATTATCTATTTTCATTACCATTATGATTAAGATTTATATTTTACGGATGATTAATAAACAACACTCAACACATATTTTATTCATATAAATTCCTCAAGG

9 MT492035.1 CTATGTCATTATCTATTTTCATTACCATTATGATTAAGATTTATATTTTACGGATGATTAATAAACAACACTCAACACATATTTTATTCATATAAATTCCTCAAGG

4701

8 4800

T P T I L M P F M V L I E T I S N I I R P G T L A V R L T A N M I

1 MN793322.1 AACACCAACAATTTTAAATACCATTTATAGTATTAATTTGAACAATTTAGAAATATTATTCGACCTGGAACCTTTAGCAGTACGACTTACTGCTAATAATAATT

2 MT492036.1 AACACCAACAATTTTAAATACCATTTATAGTATTAATTTGAACAATTTAGAAATATTATTCGACCTGGAACCTTTAGCAGTACGACTTACTGCTAATAATAATT

3 MT492037.1 AACACCAACAATTTTAAATACCATTTATAGTATTAATTTGAACAATTTAGAAATATTATTCGACCTGGAACCTTTAGCAGTACGACTTACTGCTAATAATAATT

4 MT492030.1 AACACCAACAATTTTAAATACCATTTATAGTATTAATTTGAACAATTTAGAAATATTATTCGACCTGGAACCTTTAGCAGTACGACTTACTGCTAATAATAATT

5 MT492031.1 AACACCAACAATTTTAAATACCATTTATAGTATTAATTTGAACAATTTAGAAATATTATTCGACCTGGAACCTTTAGCAGTACGACTTACTGCTAATAATAATT

6 MT492032.1 AACACCAACAATTTTAAATACCATTTATAGTATTAATTTGAACAATTTAGAAATATTATTCGACCTGGAACCTTTAGCAGTACGACTTACTGCTAATAATAATT

7 MT492033.1 AACACCAACAATTTTAAATACCATTTATAGTATTAATTTGAACAATTTAGAAATATTATTCGACCTGGAACCTTTAGCAGTACGACTTACTGCTAATAATAATT

8 MT492034.1 AACACCAACAATTTTAAATACCATTTATAGTATTAATTTGAACAATTTAGAAATATTATTCGACCTGGAACCTTTAGCAGTACGACTTACTGCTAATAATAATT

9 MT492035.1 AACACCAACAATTTTAAATACCATTTATAGTATTAATTTGAACAATTTAGAAATATTATTCGACCTGGAACCTTTAGCAGTACGACTTACTGCTAATAATAATT

4801

9 4900

A G H L L M T L L S G T G N S L S T Y M I I L L V I I Q I L L L I  
 1 MN793322.1 GCAGGACATTTACTAATAACTTTACTTTAGAGGTACTGGAAATAGATTAAGAACGTATATAATTATTTTATTAGTAATTATTCAAAATTTTATTGTTAATTT  
 2 MT492036.1 GCAGGACATTTACTAATAACTTTACTTTAGAGGTACTGGAAATAGATTAAGAACGTATATAATTATTTTATTAGTAATTATTCAAAATTTTATTGTTAATTT  
 3 MT492037.1 GCAGGACATTTACTAATAACTTTACTTTAGAGGTACTGGAAATAGATTAAGAACGTATATAATTATTTTATTAGTAATTATTCAAAATTTTATTGTTAATTT  
 4 MT492030.1 GCAGGACATTTACTAATAACTTTACTTTAGAGGTACTGGAAATAGATTAAGAACGTATATAATTATTTTATTAGTAATTATTCAAAATTTTATTGTTAATTT  
 5 MT492031.1 GCAGGACATTTACTAATAACTTTACTTTAGAGGTACTGGAAATAGATTAAGAACGTATATAATTATTTTATTAGTAATTATTCAAAATTTTATTGTTAATTT  
 6 MT492032.1 GCAGGACATTTACTAATAACTTTACTTTAGAGGTACTGGAAATAGATTAAGAACGTATATAATTATTTTATTAGTAATTATTCAAAATTTTATTGTTAATTT  
 7 MT492033.1 GCAGGACATTTACTAATAACTTTACTTTAGAGGTACTGGAAATAGATTAAGAACGTATATAATTATTTTATTAGTAATTATTCAAAATTTTATTGTTAATTT  
 8 MT492034.1 GCAGGACATTTACTAATAACTTTACTTTAGAGGTACTGGAAATAGATTAAGAACGTATATAATTATTTTATTAGTAATTATTCAAAATTTTATTGTTAATTT  
 9 MT492035.1 GCAGGACATTTACTAATAACTTTACTTTAGAGGTACTGGAAATAGATTAAGAACGTATATAATTATTTTATTAGTAATTATTCAAAATTTTATTGTTAATTT

|COIII ->

4901

0 5000

L E S A V A V I Q S Y V I A I L S T L Y S S E V N \* M K N N F Y S H  
 1 MN793322.1 TAGAATCTGCAGTGGCAGTAATTC AATCTTATGTAATTGCCATTTTAAGAACTTTATATTC TAGAGAAGTAAAT TAATCAAAAATAATTTTACAGACAT  
 2 MT492036.1 TAGAATCTGCAGTGGCAGTAATTC AATCTTATGTAATTGCCATTTTAAGAACTTTATATTC TAGAGAAGTAAAT TAATCAAAAATAATTTTACAGACAT  
 3 MT492037.1 TAGAATCTGCAGTGGCAGTAATTC AATCTTATGTAATTGCCATTTTAAGAACTTTATATTC TAGAGAAGTAAAT TAATCAAAAATAATTTTACAGACAT  
 4 MT492030.1 TAGAATCTGCAGTGGCAGTAATTC AATCTTATGTAATTGCCATTTTAAGAACTTTATATTC TAGAGAAGTAAAT TAATCAAAAATAATTTTACAGACAT  
 5 MT492031.1 TAGAATCTGCAGTGGCAGTAATTC AATCTTATGTAATTGCCATTTTAAGAACTTTATATTC TAGAGAAGTAAAT TAATCAAAAATAATTTTACAGACAT  
 6 MT492032.1 TAGAATCTGCAGTGGCAGTAATTC AATCTTATGTAATTGCCATTTTAAGAACTTTATATTC TAGAGAAGTAAAT TAATCAAAAATAATTTTACAGACAT  
 7 MT492033.1 TAGAATCTGCAGTGGCAGTAATTC AATCTTATGTAATTGCCATTTTAAGAACTTTATATTC TAGAGAAGTAAAT TAATCAAAAATAATTTTACAGACAT  
 8 MT492034.1 TAGAATCTGCAGTGGCAGTAATTC AATCTTATGTAATTGCCATTTTAAGAACTTTATATTC TAGAGAAGTAAAT TAATCAAAAATAATTTTACAGACAT  
 9 MT492035.1 TAGAATCTGCAGTGGCAGTAATTC AATCTTATGTAATTGCCATTTTAAGAACTTTATATTC TAGAGAAGTAAAT TAATCAAAAATAATTTTACAGACAT

5001

1 5100

P Y H L V D Y S P W P I T G A I G V L T L V T G M V K W F H N F N  
 1 MN793322.1 CCATATCATTAGTTGATTACAGACCTTGACCTATTACCGGAGCTATTGGAGTATTAACCTTAGTTACAGGAATAGTTAAATGATTTACACAATTTTAACA  
 2 MT492036.1 CCATATCATTAGTTGATTACAGACCTTGACCTATTACCGGAGCTATTGGAGTATTAACCTTAGTTACAGGAATAGTTAAATGATTTACACAATTTTAACA  
 3 MT492037.1 CCATATCATTAGTTGATTACAGACCTTGACCTATTACCGGAGCTATTGGAGTATTAACCTTAGTTACAGGAATAGTTAAATGATTTACACAATTTTAACA  
 4 MT492030.1 CCATATCATTAGTTGATTACAGACCTTGACCTATTACCGGAGCTATTGGAGTATTAACCTTAGTTACAGGAATAGTTAAATGATTTACACAATTTTAACA  
 5 MT492031.1 CCATATCATTAGTTGATTACAGACCTTGACCTATTACCGGAGCTATTGGAGTATTAACCTTAGTTACAGGAATAGTTAAATGATTTACACAATTTTAACA  
 6 MT492032.1 CCATATCATTAGTTGATTACAGACCTTGACCTATTACCGGAGCTATTGGAGTATTAACCTTAGTTACAGGAATAGTTAAATGATTTACACAATTTTAACA  
 7 MT492033.1 CCATATCATTAGTTGATTACAGACCTTGACCTATTACCGGAGCTATTGGAGTATTAACCTTAGTTACAGGAATAGTTAAATGATTTACACAATTTTAACA  
 8 MT492034.1 CCATATCATTAGTTGATTACAGACCTTGACCTATTACCGGAGCTATTGGAGTATTAACCTTAGTTACAGGAATAGTTAAATGATTTACACAATTTTAACA  
 9 MT492035.1 CCATATCATTAGTTGATTACAGACCTTGACCTATTACCGGAGCTATTGGAGTATTAACCTTAGTTACAGGAATAGTTAAATGATTTACACAATTTTAACA

5101

2 5200

M N L L M L G Y L I I I L T M Y Q W W R D V S R E G T F Q G K H T I  
 1 MN793322.1 TAAATTTATTAATATTAGGCTATTTAATTATTTTAAACAATATATCAATGATGACGAGATGTATCACGAGAAGGAACATTTCAAGGTAAACATACCAT  
 2 MT492036.1 TAAATTTATTAATATTAGGCTATTTAATTATTTTAAACAATATATCAATGATGACGAGATGTATCACGAGAAGGAACATTTCAAGGTAAACATACCAT  
 3 MT492037.1 TAAATTTATTAATATTAGGCTATTTAATTATTTTAAACAATATATCAATGATGACGAGATGTATCACGAGAAGGAACATTTCAAGGTAAACATACCAT  
 4 MT492030.1 TAAATTTATTAATATTAGGCTATTTAATTATTTTAAACAATATATCAATGATGACGAGATGTATCACGAGAAGGAACATTTCAAGGTAAACATACCAT  
 5 MT492031.1 TAAATTTATTAATATTAGGCTATTTAATTATTTTAAACAATATATCAATGATGACGAGATGTATCACGAGAAGGAACATTTCAAGGTAAACATACCAT  
 6 MT492032.1 TAAATTTATTAATATTAGGCTATTTAATTATTTTAAACAATATATCAATGATGACGAGATGTATCACGAGAAGGAACATTTCAAGGTAAACATACCAT  
 7 MT492033.1 TAAATTTATTAATATTAGGCTATTTAATTATTTTAAACAATATATCAATGATGACGAGATGTATCACGAGAAGGAACATTTCAAGGTAAACATACCAT  
 8 MT492034.1 TAAATTTATTAATATTAGGCTATTTAATTATTTTAAACAATATATCAATGATGACGAGATGTATCACGAGAAGGAACATTTCAAGGTAAACATACCAT  
 9 MT492035.1 TAAATTTATTAATATTAGGCTATTTAATTATTTTAAACAATATATCAATGATGACGAGATGTATCACGAGAAGGAACATTTCAAGGTAAACATACCAT



5201

3 5300

L V T K G L R W G M I L F I I S E I F F F I S F F W A F F H S S L  
 1 MN793322.1 TTTAGTAACTAAAGGATTACGATGAGGAATAATCTTATTTATTATTTCTGAAATTTTTTTTTTCATTTTCATTTTTTTGAGCATTTTTTTCATAGTAGATTA  
 2 MT492036.1 TTTAGTAACTAAAGGATTACGATGAGGAATAATCTTATTTATTATTTCTGAAATTTTTTTTTTCATTTTCATTTTTTTGAGCATTTTTTTCATAGTAGATTA  
 3 MT492037.1 TTTAGTAACTAAAGGATTACGATGAGGAATAATCTTATTTATTATTTCTGAAATTTTTTTTTTCATTTTCATTTTTTTGAGCATTTTTTTCATAGTAGATTA  
 4 MT492030.1 TTTAGTAACTAAAGGATTACGATGAGGAATAATCTTATTTATTATTTCTGAAATTTTTTTTTTCATTTTCATTTTTTTGAGCATTTTTTTCATAGTAGATTA  
 5 MT492031.1 TTTAGTAACTAAAGGATTACGATGAGGAATAATCTTATTTATTATTTCTGAAATTTTTTTTTTCATTTTCATTTTTTTGAGCATTTTTTTCATAGTAGATTA  
 6 MT492032.1 TTTAGTAACTAAAGGATTACGATGAGGAATAATCTTATTTATTATTTCTGAAATTTTTTTTTTCATTTTCATTTTTTTGAGCATTTTTTTCATAGTAGATTA  
 7 MT492033.1 TTTAGTAACTAAAGGATTACGATGAGGAATAATCTTATTTATTATTTCTGAAATTTTTTTTTTCATTTTCATTTTTTTGAGCATTTTTTTCATAGTAGATTA  
 8 MT492034.1 TTTAGTAACTAAAGGATTACGATGAGGAATAATCTTATTTATTATTTCTGAAATTTTTTTTTTCATTTTCATTTTTTTGAGCATTTTTTTCATAGTAGATTA  
 9 MT492035.1 TTTAGTAACTAAAGGATTACGATGAGGAATAATCTTATTTATTATTTCTGAAATTTTTTTTTTCATTTTCATTTTTTTGAGCATTTTTTTCATAGTAGATTA

5301

4 5400

S P N I E I G A T W P P T N I V P F N P F Q I P L L N T I I L I T  
 1 MN793322.1 TCACCTAATATTGAAATTGGAGCAACTTGACCTCCTACAAATATTGTACCATTAAATCCATTTCAAATTCATTACTAAATACAATCATTTTAATTACAT  
 2 MT492036.1 TCACCTAATATTGAAATTGGAGCAACTTGACCTCCTACAAATATTGTACCATTAAATCCATTTCAAATTCATTACTAAATACAATCATTTTAATTACAT  
 3 MT492037.1 TCACCTAATATTGAAATTGGAGCAACTTGACCTCCTACAAATATTGTACCATTAAATCCATTTCAAATTCATTACTAAATACAATCATTTTAATTACAT  
 4 MT492030.1 TCACCTAATATTGAAATTGGAGCAACTTGACCTCCTACAAATATTGTACCATTAAATCCATTTCAAATTCATTACTAAATACAATCATTTTAATTACAT  
 5 MT492031.1 TCACCTAATATTGAAATTGGAGCAACTTGACCTCCTACAAATATTGTACCATTAAATCCATTTCAAATTCATTACTAAATACAATCATTTTAATTACAT  
 6 MT492032.1 TCACCTAATATTGAAATTGGAGCAACTTGACCTCCTACAAATATTGTACCATTAAATCCATTTCAAATTCATTACTAAATACAATCATTTTAATTACAT  
 7 MT492033.1 TCACCTAATATTGAAATTGGAGCAACTTGACCTCCTACAAATATTGTACCATTAAATCCATTTCAAATTCATTACTAAATACAATCATTTTAATTACAT  
 8 MT492034.1 TCACCTAATATTGAAATTGGAGCAACTTGACCTCCTACAAATATTGTACCATTAAATCCATTTCAAATTCATTACTAAATACAATCATTTTAATTACAT  
 9 MT492035.1 TCACCTAATATTGAAATTGGAGCAACTTGACCTCCTACAAATATTGTACCATTAAATCCATTTCAAATTCATTACTAAATACAATCATTTTAATTACAT

5401

5 5500

S G V T V T W A H H A I M E N N H S Q M T Q G L F L T I I L G I Y F  
 1 MN793322.1 CAGGAGTAACAGTAACATGGGCTCACCATGCAATTTATAGAAAATAACCACCTCTCAAATAACTCAAGGATTATTTTAACTATTATTTTAGGAATTTATTT  
 2 MT492036.1 CAGGAGTAACAGTAACATGGGCTCACCATGCAATTTATAGAAAATAACCACCTCTCAAATAACTCAAGGATTATTTTAACTATTATTTTAGGAATTTATTT  
 3 MT492037.1 CAGGAGTAACAGTAACATGGGCTCACCATGCAATTTATAGAAAATAACCACCTCTCAAATAACTCAAGGATTATTTTAACTATTATTTTAGGAATTTATTT  
 4 MT492030.1 CAGGAGTAACAGTAACATGGGCTCACCATGCAATTTATAGAAAATAACCACCTCTCAAATAACTCAAGGATTATTTTAACTATTATTTTAGGAATTTATTT  
 5 MT492031.1 CAGGAGTAACAGTAACATGGGCTCACCATGCAATTTATAGAAAATAACCACCTCTCAAATAACTCAAGGATTATTTTAACTATTATTTTAGGAATTTATTT  
 6 MT492032.1 CAGGAGTAACAGTAACATGGGCTCA<sup>T</sup>CATGCAATTTATAGAAAATAACCACCTCTCAAATAACTCAAGGATTATTTTAACTATTATTTTAGGAATTTATTT  
 7 MT492033.1 CAGGAGTAACAGTAACATGGGCTCACCATGCAATTTATAGAAAATAACCACCTCTCAAATAACTCAAGGATTATTTTAACTATTATTTTAGGAATTTATTT  
 8 MT492034.1 CAGGAGTAACAGTAACATGGGCTCA<sup>T</sup>CATGCAATTTATAGAAAATAACCACCTCTCAAATAACTCAAGGATTATTTTAACTATTATTTTAGGAATTTATTT  
 9 MT492035.1 CAGGAGTAACAGTAACATGGGCTCACCATGCAATTTATAGAAAATAACCACCTCTCAAATAACTCAAGGATTATTTTAACTATTATTTTAGGAATTTATTT

5501

6 5600

T F L Q A Y E Y L E A P F T I A D S I Y G S T F F M A T G F H G L  
 1 MN793322.1 CACTTTTCTTCAAGCATATGAATATTTAGAAGCACCTTTTACTATCGCAGATAGAATTTATGGATCTACATTTTTTATAGCAACAGGATTCATGGATTA  
 2 MT492036.1 CACTTTTCTTCAAGCATATGAATATTTAGAAGCACCTTTTACTATCGCAGATAGAATTTATGGATCTACATTTTTTATAGCAACAGGATTCATGGATTA  
 3 MT492037.1 CACTTTTCTTCAAGCATATGAATATTTAGAAGCACCTTTTACTATCGCAGATAGAATTTATGGATCTACATTTTTTATAGCAACAGGATTCATGGATTA  
 4 MT492030.1 CACTTTTCTTCAAGCATATGAATATTTAGAAGCACCTTTTACTATCGCAGATAGAATTTATGGATCTACATTTTTTATAGCAACAGGATTCATGGATTA  
 5 MT492031.1 CACTTTTCTTCAAGCATATGAATATTTAGAAGCACCTTTTACTATCGCAGATAGAATTTATGGATCTACATTTTTTATAGCAACAGGATTCATGGATTA  
 6 MT492032.1 CACTTTTCTTCAAGCATATGAATATTTAGAAGCACCTTTTACTATCGCAGATAGAATTTATGGATCTACATTTTTTATAGCAACAGGATTCATGGATTA  
 7 MT492033.1 CACTTTTCTTCAAGCATATGAATATTTAGAAGCACCTTTTACTATCGCAGATAGAATTTATGGATCTACATTTTTTATAGCAACAGGATTCATGGATTA  
 8 MT492034.1 CACTTTTCTTCAAGCATATGAATATTTAGAAGCACCTTTTACTATCGCAGATAGAATTTATGGATCTACATTTTTTATAGCAACAGGATTCATGGATTA  
 9 MT492035.1 CACTTTTCTTCAAGCATATGAATATTTAGAAGCACCTTTTACTATCGCAGATAGAATTTATGGATCTACATTTTTTATAGCAACAGGATTCATGGATTA

5601

7 5700

H V M I G T M F L L I C L I R H I N N Q F S N N H H F G F E A A A  
 1 MN793322.1 CATGTAATAAATGGAAACAATATTTTTATTAATTTGTTAATTCGTCATATTAATAATCAATTTTCTAATAACCATCATTTTGGATTGAAGCAGCAGCTT  
 2 MT492036.1 CATGTAATAAATGGAAACAATATTTTTATTAATTTGTTAATTCGTCATATTAATAATCAATTTTCTAATAACCATCATTTTGGATTGAAGCAGCAGCTT  
 3 MT492037.1 CATGTAATAAATGGAAACAATATTTTTATTAATTTGTTAATTCGTCATATTAATAATCAATTTTCTAATAACCATCATTTTGGATTGAAGCAGCAGCTT  
 4 MT492030.1 CATGTAATAAATGGAAACAATATTTTTATTAATTTGTTAATTCGTCATATTAATAATCAATTTTCTAATAACCATCATTTTGGATTGAAGCAGCAGCTT  
 5 MT492031.1 CATGTAATAAATGGAAACAATATTTTTATTAATTTGTTAATTCGTCATATTAATAATCAATTTTCTAATAACCATCATTTTGGATTGAAGCAGCAGCTT  
 6 MT492032.1 CATGTAATAAATGGAAACAATATTTTTATTAATTTGTTAATTCGTCATATTAATAATCAATTTTCTAATAACCATCATTTTGGATTGAAGCAGCAGCTT  
 7 MT492033.1 CATGTAATAAATGGAAACAATATTTTTATTAATTTGTTAATTCGTCATATTAATAATCAATTTTCTAATAACCATCATTTTGGATTGAAGCAGCAGCTT  
 8 MT492034.1 CATGTAATAAATGGAAACAATATTTTTATTAATTTGTTAATTCGTCATATTAATAATCAATTTTCTAATAACCATCATTTTGGATTGAAGCAGCAGCTT  
 9 MT492035.1 CATGTAATAAATGGAAACAATATTTTTATTAATTTGTTAATTCGTCATATTAATAATCAATTTTCTAATAACCATCATTTTGGATTGAAGCAGCAGCTT

| tRNA-Glu (UCC) ->

5701

8 5800

W Y W H F V D V V W L F L Y I S I Y W W G N \* atttatataatatatttagtatatttgact  
 1 MN793322.1 GATATTGACATTTGTAGATGTAGTTGATTATTCCTTTATATTTCTATTTATTGATGAGGAAATTAATTATTTATATAATATATTTAGTATATTTGACT  
 2 MT492036.1 GATATTGACATTTGTAGATGTAGTTGATTATTCCTTTATATTTCTATTTATTGATGAGGAAATTAATTATTTATATAATATATTTAGTATATTTGACT  
 3 MT492037.1 GATATTGACATTTGTAGATGTAGTTGATTATTCCTTTATATTTCTATTTATTGATGAGGAAATTAATTATTTATATAATATATTTAGTATATTTGACT  
 4 MT492030.1 GATATTGACATTTGTAGATGTAGTTGATTATTCCTTTATATTTCTATTTATTGATGAGGAAATTAATTATTTATATAATATATTTAGTATATTTGACT  
 5 MT492031.1 GATATTGACATTTGTAGATGTAGTTGATTATTCCTTTATATTTCTATTTATTGATGAGGAAATTAATTATTTATATAATATATTTAGTATATTTGACT  
 6 MT492032.1 GATATTGACATTTGTAGATGTAGTTGATTATTCCTTTATATTTCTATTTATTGATGAGGAAATTAATTATTTATATAATATATTTAGTATATTTGACT  
 7 MT492033.1 GATATTGACATTTGTAGATGTAGTTGATTATTCCTTTATATTTCTATTTATTGATGAGGAAATTAATTATTTATATAATATATTTAGTATATTTGACT  
 8 MT492034.1 GATATTGACATTTGTAGATGTAGTTGATTATTCCTTTATATTTCTATTTATTGATGAGGAAATTAATTATTTATATAATATATTTAGTATATTTGACT  
 9 MT492035.1 GATATTGACATTTGTAGATGTAGTTGATTATTCCTTTATATTTCTATTTATTGATGAGGAAATTAATTATTTATATAATATATTTAGTATATTTGACT

| ND3 ->

5801

9 5900

tccaatcaaaaagttaaataatattttattaataataa M I L I S Y I S I I I M M I S N I M M F L  
 1 MN793322.1 TCCAATCAAAAAGTTAATATTTTATTAATATAAATAATTAATTTAATTAGTTATATTTCTATTATTATTATAATAATCTCAAATATTATAATATTTTTA  
 2 MT492036.1 TCCAATCAAAAAGTTAATATTTTATTAATATAAATAATTAATTTAATTAGTTATATTTCTATTATTATTATAATAATCTCAAATATTATAATATTTTTA  
 3 MT492037.1 TCCAATCAAAAAGTTAATATTTTATTAATATAAATAATTAATTTAATTAGTTATATTTCTATTATTATTATAATAATCTCAAATATTATAATATTTTTA  
 4 MT492030.1 TCCAATCAAAAAGTTAATATTTTATTAATATAAATAATTAATTTAATTAGTTATATTTCTATTATTATTATAATAATCTCAAATATTATAATATTTTTA  
 5 MT492031.1 TCCAATCAAAAAGTTAATATTTTATTAATATAAATAATTAATTTAATTAGTTATATTTCTATTATTATTATAATAATCTCAAATATTATAATATTTTTA  
 6 MT492032.1 TCCAATCAAAAAGTTAATATTTTATTAATATAAATAATTAATTTAATTAGTTATATTTCTATTATTATTATAATAATCTCAAATATTATAATATTTTTA  
 7 MT492033.1 TCCAATCAAAAAGTTAATATTTTATTAATATAAATAATTAATTTAATTAGTTATATTTCTATTATTATTATAATAATCTCAAATATTATAATATTTTTA  
 8 MT492034.1 TCCAATCAAAAAGTTAATATTTTATTAATATAAATAATTAATTTAATTAGTTATATTTCTATTATTATTATAATAATCTCAAATATTATAATATTTTTA  
 9 MT492035.1 TCCAATCAAAAAGTTAATATTTTATTAATATAAATAATTAATTTAATTAGTTATATTTCTATTATTATTATAATAATCTCAAATATTATAATATTTTTA

5901

0 6000

S I I L S K K S F S D R E K N S P F E C G F D P K S S A R I P F S  
 1 MN793322.1 TCCATTATTTTATCAAAAAATCATTTCCTGATCGAGAAAAAATTCCCCATTTGAATGTGGATTGATCCAAAATCATCAGCTCGAATCCCATTCTCCT  
 2 MT492036.1 TCCATTATTTTATCAAAAAATCATTTCCTGATCGAGAAAAAATTCCCCATTTGAATGTGGATTGATCCAAAATCATCAGCTCGAATCCCATTCTCCT  
 3 MT492037.1 TCCATTATTTTATCAAAAAATCATTTCCTGATCGAGAAAAAATTCCCCATTTGAATGTGGATTGATCCAAAATCATCAGCTCGAATCCCATTCTCCT  
 4 MT492030.1 TCCATTATTTTATCAAAAAATCATTTCCTGATCGAGAAAAAATTCCCCATTTGAATGTGGATTGATCCAAAATCATCAGCTCGAATCCCATTCTCCT  
 5 MT492031.1 TCCATTATTTTATCAAAAAATCATTTCCTGATCGAGAAAAAATTCCCCATTTGAATGTGGATTGATCCAAAATCATCAGCTCGAATCCCATTCTCCT  
 6 MT492032.1 TCCATTATTTTATCAAAAAATCATTTCCTGATCGAGAAAAAATTCCCCATTTGAATGTGGATTGATCCAAAATCATCAGCTCGAATCCCATTCTCCT  
 7 MT492033.1 TCCATTATTTTATCAAAAAATCATTTCCTGATCGAGAAAAAATTCCCCATTTGAATGTGGATTGATCCAAAATCATCAGCTCGAATCCCATTCTCCT  
 8 MT492034.1 TCCATTATTTTATCAAAAAATCATTTCCTGATCGAGAAAAAATTCCCCATTTGAATGTGGATTGATCCAAAATCATCAGCTCGAATCCCATTCTCCT  
 9 MT492035.1 TCCATTATTTTATCAAAAAATCATTTCCTGATCGAGAAAAAATTCCCCATTTGAATGTGGATTGATCCAAAATCATCAGCTCGAATCCCATTCTCCT

6001 . . . . . : . . . . . 1 6100  
L H F F L I T M I F L I F D V E I A L I F P M I N L F K M T N F I I  
1 MN793322.1 TACATTCTTCTTAATTACAATAATTTTTTAATTTTGTGTTGAAATTGCATTAATTTTTCCTATAATTAATTTATTTAAAAATAACAAATTTTATTAT  
2 MT492036.1 TACATTCTTCTTAATTACAATAATTTTTTAATTTTGTGTTGAAATTGCATTAATTTTTCCTATAATTAATTTATTTAAAAATAACAAATTTTATTAT  
3 MT492037.1 TACATTCTTCTTAATTACAATAATTTTTTAATTTTGTGTTGAAATTGCATTAATTTTTCCTATAATTAATTTATTTAAAAATAACAAATTTTATTAT  
4 MT492030.1 TACATTCTTCTTAATTACAATAATTTTTTAATTTTGTGTTGAAATTGCATTAATTTTTCCTATAATTAATTTATTTAAAAATAACAAATTTTATTAT  
5 MT492031.1 TACATTCTTCTTAATTACAATAATTTTTTAATTTTGTGTTGAAATTGCATTAATTTTTCCTATAATTAATTTATTTAAAAATAACAAATTTTATTAT  
6 MT492032.1 TACATTCTTCTTAATTACAATAATTTTTTAATTTTGTGTTGAAATTGCATTAATTTTTCCTATAATTAATTTATTTAAAAATAACAAATTTTATTAT  
7 MT492033.1 TACATTCTTCTTAATTACAATAATTTTTTAATTTTGTGTTGAAATTGCATTAATTTTTCCTATAATTAATTTATTTAAAAATAACAAATTTTATTAT  
8 MT492034.1 TACATTCTTCTTAATTACAATAATTTTTTAATTTTGTGTTGAAATTGCATTAATTTTTCCTATAATTAATTTATTTAAAAATAACAAATTTTATTAT  
9 MT492035.1 TACATTCTTCTTAATTACAATAATTTTTTAATTTTGTGTTGAAATTGCATTAATTTTTCCTATAATTAATTTATTTAAAAATAACAAATTTTATTAT

6101 . . . . . : . . . . . 2 6200  
W T K I S F F F I I I L L I G L F H E W N Q N M L N W T K \*  
1 MN793322.1 TTGAACATAAAATTAGTTTTTTTTTTTATTATTATTTTATTAATTGGGCTATTTTCATGAATGAAACCAAAATATATTAATTTGAACATAAAATAAAAAATAAT  
2 MT492036.1 TTGAACATAAAATTAGTTTTTTTTTTTATTATTATTTTATTAATTGGGCTATTTTCATGAATGAAACCAAAATATATTAATTTGAACATAAAATAAAAAATAAT  
3 MT492037.1 TTGAACATAAAATTAGTTTTTTTTTTTATTATTATTTTATTAATTGGGCTATTTTCATGAATGAAACCAAAATATATTAATTTGAACATAAAATAAAAAATAAT  
4 MT492030.1 TTGAACATAAAATTAGTTTTTTTTTTTATTATTATTTTATTAATTGGGCTATTTTCATGAATGAAACCAAAATATATTAATTTGAACATAAAATAAAAAATAAT  
5 MT492031.1 TTGAACATAAAATTAGTTTTTTTTTTTATTATTATTTTATTAATTGGGCTATTTTCATGAATGAAACCAAAATATATTAATTTGAACATAAAATAAAAAATAAT  
6 MT492032.1 TTGAACATAAAATTAGTTTTTTTTTTTATTATTATTTTATTAATTGGGCTATTTTCATGAATGAAACCAAAATATATTAATTTGAACATAAAATAAAAAATAAT  
7 MT492033.1 TTGAACATAAAATTAGTTTTTTTTTTTATTATTATTTTATTAATTGGGCTATTTTCATGAATGAAACCAAAATATATTAATTTGAACATAAAATAAAAAATAAT  
8 MT492034.1 TTGAACATAAAATTAGTTTTTTTTTTTATTATTATTTTATTAATTGGGCTATTTTCATGAATGAAACCAAAATATATTAATTTGAACATAAAATAAAAAATAAT  
9 MT492035.1 TTGAACATAAAATTAGTTTTTTTTTTTATTATTATTTTATTAATTGGGCTATTTTCATGAATGAAACCAAAATATATTAATTTGAACATAAAATAAAAAATAAT

| tRNA-Ala (UGC) -> | tRNA-Arg (UCG) ->  
6201 . . . . . : . . . . . 3 6300  
Aggattatagtttaataaaaacatttgattgacctcaaaaaatattgaataaatcaatttatctta aataagaagc-aatatttgcatttaatttcga  
A  
1 MN793322.1 AAGGATTATAGTTTAAATAAAAACATTGATTGCACTCAAAAAATATTGAATAAATCAATTTATCTTAAATAAGAAGC-AATATTGCAATTAATTTTCGA  
2 MT492036.1 AAGGATTATAGTTTAAATAAAAACATTGATTGCACTCAAAAAATATTGAATAAATCAATTTATCTTAAATAAGAAGC-AATATTGCAATTAATTTTCGA  
3 MT492037.1 AAGGATTATAGTTTAAATAAAAACATTGATTGCACTCAAAAAATATTGAATAAATCAATTTATCTTAAATAAGAAGC-AATATTGCAATTAATTTTCGA  
4 MT492030.1 AAGGATTATAGTTTAAATAAAAACATTGATTGCACTCAAAAAATATTGAATAAATCAATTTATCTTAAATAAGAAGC-AATATTGCAATTAATTTTCGA  
5 MT492031.1 AAGGATTATAGTTTAAATAAAAACATTGATTGCACTCAAAAAATATTGAATAAATCAATTTATCTTAAATAAGAAGC-AATATTGCAATTAATTTTCGA  
6 MT492032.1 AAGGATTATAGTTTAAATAAAAACATTGATTGCACTCAAAAAATATTGAATAAATCAATTTATCTTAAATAAGAAGC-AATATTGCAATTAATTTTCGA  
7 MT492033.1 AAGGATTATAGTTTAAATAAAAACATTGATTGCACTCAAAAAATATTGAATAAATCAATTTATCTTAAATAAGAAGC-AATATTGCAATTAATTTTCGA  
8 MT492034.1 AAGGATTATAGTTTAAATAAAAACATTGATTGCACTCAAAAAATATTGAATAAATCAATTTATCTTAAATAAGAAGC-AATATTGCAATTAATTTTCGA  
9 MT492035.1 AAGGATTATAGTTTAAATAAAAACATTGATTGCACTCAAAAAATATTGAATAAATCAATTTATCTTAAATAAGAAGC-AATATTGCAATTAATTTTCGA

| tRNA-Asn (GUU) ->  
6301 . . . . . : . . . . . 4 6400  
cttaaaagatagagttttaataactccttatttt  
1 MN793322.1 CTTAAAAGATAGAGTTTAAATACTCCTTATTTTGTGTTGAAACCAAAATAGAGGTATATCACTGTTAATGATAAAAATTGAATTATAAATTTCCAACATAAAA  
2 MT492036.1 CTTAAAAGATAGAGTTTAAATACTCCTTATTTTGTGTTGAAACCAAAATAGAGGTATATCACTGTTAATGATAAAAATTGAATTATAAATTTCCAACATAAAA  
3 MT492037.1 CTTAAAAGATAGAGTTTAAATACTCCTTATTTTGTGTTGAAACCAAAATAGAGGTATATCACTGTTAATGATAAAAATTGAATTATAAATTTCCAACATAAAA  
4 MT492030.1 CTTAAAAGATAGAGTTTAAATACTCCTTATTTTGTGTTGAAACCAAAATAGAGGTATATCACTGTTAATGATAAAAATTGAATTATAAATTTCCAACATAAAA  
5 MT492031.1 CTTAAAAGATAGAGTTTAAATACTCCTTATTTTGTGTTGAAACCAAAATAGAGGTATATCACTGTTAATGATAAAAATTGAATTATAAATTTCCAACATAAAA  
6 MT492032.1 CTTAAAAGATAGAGTTTAAATACTCCTTATTTTGTGTTGAAACCAAAATAGAGGTATATCACTGTTAATGATAAAAATTGAATTATAAATTTCCAACATAAAA  
7 MT492033.1 CTTAAAAGATAGAGTTTAAATACTCCTTATTTTGTGTTGAAACCAAAATAGAGGTATATCACTGTTAATGATAAAAATTGAATTATAAATTTCCAACATAAAA  
8 MT492034.1 CTTAAAAGATAGAGTTTAAATACTCCTTATTTTGTGTTGAAACCAAAATAGAGGTATATCACTGTTAATGATAAAAATTGAATTATAAATTTCCAACATAAAA

9 MT492035.1 CTTAAAAGATAGAGTTTTAATACTCCTTATTTTTAGTTGAAACCAAATAGAGGTATATCACTGTTAATGATAAAAATTGAATTATAAAATCCAACATAAAA

| tRNA-Ser (GCU) ->

| tRNA-Gln (UUC) ->

6401

5 6500

Gaaatataaaagtataaaaattaagctgctaacttaatttttagtggttaattccattaatatttct atttatatagtttaaatataaaaacattacattt  
 1 MN793322.1 AGAAATATAAAGTATAAAAATTAAGCTGCTAACTTAATTTTTAGTGGTTTAAATCCATTAATATTTCTTATTATATAGTTTAATATAAAAACATTACATTT  
 2 MT492036.1 AGAAATATAAAGTATAAAAATTAAGCTGCTAACTTAATTTTTAGTGGTTTAAATCCATTAATATTTCTTATTATATAGTTTAATATAAAAACATTACATTT  
 3 MT492037.1 AGAAATATAAAGTATAAAAATTAAGCTGCTAACTTAATTTTTAGTGGTTTAAATCCATTAATATTTCTTATTATATAGTTTAATATAAAAACATTACATTT  
 4 MT492030.1 AGAAATATAAAGTATAAAAATTAAGCTGCTAACTTAATTTTTAGTGGTTTAAATCCATTAATATTTCTTATTATATAGTTTAATATAAAAACATTACATTT  
 5 MT492031.1 AGAAATATAAAGTATAAAAATTAAGCTGCTAACTTAATTTTTAGTGGTTTAAATCCATTAATATTTCTTATTATATAGTTTAATATAAAAACATTACATTT  
 6 MT492032.1 AGAAATATAAAGTATAAAAATTAAGCTGCTAACTTAATTTTTAGTGGTTTAAATCCATTAATATTTCTTATTATATAGTTTAATATAAAAACATTACATTT  
 7 MT492033.1 AGAAATATAAAGTATAAAAATTAAGCTGCTAACTTAATTTTTAGTGGTTTAAATCCATTAATATTTCTTATTATATAGTTTAATATAAAAACATTACATTT  
 8 MT492034.1 AGAAATATAAAGTATAAAAATTAAGCTGCTAACTTAATTTTTAGTGGTTTAAATCCATTAATATTTCTTATTATATAGTTTAATATAAAAACATTACATTT  
 9 MT492035.1 AGAAATATAAAGTATAAAAATTAAGCTGCTAACTTAATTTTTAGTGGTTTAAATCCATTAATATTTCTTATTATATAGTTTAATATAAAAACATTACATTT

6501

6 6600

tcattgtaaaaataaaaaaaaaattttttataaata  
 1 MN793322.1 TCATTGTAAAAATAAAAAAAAAA TTTTTTATAAATATTTAAAGATTTAAATAATCTCCTTAATATCTTCAATATTTATGCTCTAAAAATTATAAGCTATTTA  
 2 MT492036.1 TCATTGTAAAAATAAAAAAAAAA TTTTTTATAAATATTTAAAGATTTAAATAATCTCCTTAATATCTTCAATATTTATGCTCTAAAAATTATAAGCTATTTA  
 3 MT492037.1 TCATTGTAAAAATAAAAAAAAAA TTTTTTATAAATATTTAAAGATTTAAATAATCTCCTTAATATCTTCAATATTTATGCTCTAAAAATTATAAGCTATTTA  
 4 MT492030.1 TCATTGTAAAAATAAAAAAAAAA TTTTTTATAAATATTTAAAGATTTAAATAATCTCCTTAATATCTTCAATATTTATGCTCTAAAAATTATAAGCTATTTA  
 5 MT492031.1 TCATTGTAAAAATAAAAAAAAAA TTTTTTATAAATATTTAAAGATTTAAATAATCTCCTTAATATCTTCAATATTTATGCTCTAAAAATTATAAGCTATTTA  
 6 MT492032.1 TCATTGTAAAAATAAAAAAAAAA TTTTTTATAAATATTTAAAGATTTAAATAATCTCCTTAATATCTTCAATATTTATGCTCTAAAAATTATAAGCTATTTA  
 7 MT492033.1 TCATTGTAAAAATAAAAAAAAAA TTTTTTATAAATATTTAAAGATTTAAATAATCTCCTTAATATCTTCAATATTTATGCTCTAAAAATTATAAGCTATTTA  
 8 MT492034.1 TCATTGTAAAAATAAAAAAAAAA TTTTTTATAAATATTTAAAGATTTAAATAATCTCCTTAATATCTTCAATATTTATGCTCTAAAAATTATAAGCTATTTA  
 9 MT492035.1 TCATTGTAAAAATAAAAAAAAAA TTTTTTATAAATATTTAAAGATTTAAATAATCTCCTTAATATCTTCAATATTTATGCTCTAAAAATTATAAGCTATTTA  
 ataaatttctaatttattagaggaattatagaagttataatcacgagattttaaatttcgataaat  
 <- tRNA-Phe (GAA)

6601

7 6700

AATATAAAAAAATTATTAATAAATTAATATAAATATTCATAAAAACAAATCTAAATAAATAAATTTTATAATTTTTTATAGAAAAATAAATAAATAAAT  
 1 MN793322.1 AATATAAAAAAATTATTAATAAATTAATATAAATATTCATAAAAACAAATCTAAATAAATAAATTTTATAAATTTTTTATAGAAAAATAAATAAATAAAT  
 2 MT492036.1 AATATAAAAAAATTATTAATAAATTAATATAAATATTCATAAAAACAAATCTAAATAAATAAATTTTATAAATTTTTTATAGAAAAATAAATAAATAAAT  
 3 MT492037.1 AATATAAAAAAATTATTAATAAATTAATATAAATATTCATAAAAACAAATCTAAATAAATAAATTTTATAAATTTTTTATAGAAAAATAAATAAATAAAT  
 4 MT492030.1 AATATAAAAAAATTATTAATAAATTAATATAAATATTCATAAAAACAAATCTAAATAAATAAATTTTATAAATTTTTTATAGAAAAATAAATAAATAAAT  
 5 MT492031.1 AATATAAAAAAATTATTAATAAATTAATATAAATATTCATAAAAACAAATCTAAATAAATAAATTTTATAAATTTTTTATAGAAAAATAAATAAATAAAT  
 6 MT492032.1 AATATAAAAAAATTATTAATAAATTAATATAAATATTCATAAAAACAAATCTAAATAAATAAATTTTATAAATTTTTTATAGAAAAATAAATAAATAAAT  
 7 MT492033.1 AATATAAAAAAATTATTAATAAATTAATATAAATATTCATAAAAACAAATCTAAATAAATAAATTTTATAAATTTTTTATAGAAAAATAAATAAATAAAT  
 8 MT492034.1 AATATAAAAAAATTATTAATAAATTAATATAAATATTCATAAAAACAAATCTAAATAAATAAATTTTATAAATTTTTTATAGAAAAATAAATAAATAAAT  
 9 MT492035.1 AATATAAAAAAATTATTAATAAATTAATATAAATATTCATAAAAACAAATCTAAATAAATAAATTTTATAAATTTTTTATAGAAAAATAAATAAATAAAT  
 tta\* L F I M L I I L M F M W L V F S F L Y I K Y N K M S F L N F L I  
 TTTTTTTTAAATAAATTTTATTAATTATATTTATAAGTATTTTGTTTAGATTTATTTATTTAAATATTTAAAAAATATCTTTTATTTAATTTATTTT

6701

8 6800

TGAAATATTTTTTTATAATAAAAAATATACCTTGACCTCTATATATTTCTCTTCAACCCATATCAATATTTTTTAATATTTGACCAAAAATTTAAAAAA  
 1 MN793322.1 TGAAATATTTTTTTATAATAAAAAATATACCTTGACCTCTATATATTTCTCTTCAACCCATATCAATATTTTTTAATATTTGACCAAAAATTTAAAAAA  
 2 MT492036.1 TGAGTATTTTTTTTATAATAAAAAATATACCTTGACCTCTATATATTTCTCTTCAACCCATATCAATATTTTTTAATATTTGACCAAAAATTTAAAAAA  
 3 MT492037.1 TGAGTATTTTTTTTATAATAAAAAATATACCTTGACCTCTATATATTTCTCTTCAACCCATATCAATATTTTTTAATATTTGACCAAAAATTTAAAAAA  
 4 MT492030.1 TGAGTATTTTTTTTATAATAAAAAATATACCTTGACCTCTATATATTTCTCTTCAACCCATATCAATATTTTTTAATATTTGACCAAAAATTTAAAAAA  
 5 MT492031.1 TGAGTATTTTTTTTATAATAAAAAATATACCTTGACCTCTATATATTTCTCTTCAACCCATATCAATATTTTTTAATATTTGACCAAAAATTTAAAAAA  
 6 MT492032.1 TGAGTATTTTTTTTATAATAAAAAATATACCTTGACCTCTATATATTTCTCTTCAACCCATATCAATATTTTTTAATATTTGACCAAAAATTTAAAAAA  
 7 MT492033.1 TGAGTATTTTTTTTATAATAAAAAATATACCTTGACCTCTATATATTTCTCTTCAACCCATATCAATATTTTTTAATATTTGACCAAAAATTTAAAAAA  
 8 MT492034.1 TGAGTATTTTTTTTATAATAAAAAATATACCTTGACCTCTATATATTTCTCTTCAACCCATATCAATATTTTTTAATATTTGACCAAAAATTTAAAAAA  
 9 MT492035.1 TGAGTATTTTTTTTATAATAAAAAATATACCTTGACCTCTATATATTTCTCTTCAACCCATATCAATATTTTTTAATATTTGACCAAAAATTTAAAAAA  
 S Y K K M I F F M G Q G S Y M E S W G M D I N K L M M Q G F N L F

ACTCATAAAAAATATTATTTTTTATATGGAAGTGGAGATATATAAAGAGAAGTTGGGTATAGTTATAAAAAATTATAATAAACTGGTTTTAAATTTTT

6801

9 6900

1 MN793322.1 TAAAAATTTAAACCATAAGTAGATAAATTAGGTATAAATCATATTTAAACATAAAAAATTTCTAATTTGATAAGTTATTTAAAAATTTATTAACAGAATAAAA  
2 MT492036.1 TAAAAATTTAAACCATAAGTAGATAAATTAGGTATAAATCATATTTAAACATAAAAAATTTCTAATTTGATAAGTTATTTAAAAATTTATTAACAGAATAAAA  
3 MT492037.1 TAAAAATTTAAACCATAAGTAGATAAATTAGGTATAAATCATATTTAAACATAAAAAATTTCTAATTTGATAAGTTATTTAAAAATTTATTAACAGAATAAAA  
4 MT492030.1 TAAAAATTTAAACCATAAGTAGATAAATTAGGTATAAATCATATTTAAACATAAAAAATTTCTAATTTGATAAGTTATTTAAAAATTTATTAACAGAATAAAA  
5 MT492031.1 TAAAAATTTAAACCATAAGTAGATAAATTAGGTATAAATCATATTTAAACATAAAAAATTTCTAATTTGATAAGTTATTTAAAAATTTATTAACAGAATAAAA  
6 MT492032.1 TAAAAATTTAAACCATAAGTAGATAAATTAGGTATAAATCATATTTAAACATAAAAAATTTCTAATTTGATAAGTTATTTAAAAATTTATTAACAGAATAAAA  
7 MT492033.1 TAAAAATTTAAACCATAAGTAGATAAATTAGGTATAAATCATATTTAAACATAAAAAATTTCTAATTTGATAAGTTATTTAAAAATTTATTAACAGAATAAAA  
8 MT492034.1 TAAAAATTTAAACCATAAGTAGATAAATTAGGTATAAATCATATTTAAACATAAAAAATTTCTAATTTGATAAGTTATTTAAAAATTTATTAACAGAATAAAA  
9 MT492035.1 TAAAAATTTAAACCATAAGTAGATAAATTAGGTATAAATCATATTTAAACATAAAAAATTTCTAATTTGATAAGTTATTTAAAAATTTATTAACAGAATAAAA  
Y F N L G Y T S L N P M F W M L C L F N S I Q Y T M L F K N V S Y I  
ATTTTTAAATTTGGTATTCATCTATTTAATCCATATTTAGTATAAATTTGTATTTTTTAAAGATTAACACTATTCATAATTTTTAAATAATTGCTCTTATTT

6901

0 7000

1 MN793322.1 TATTTTATATTTCTAACAATAAACCCCATAAAAACCCCTAAAATTTCTTACATAAATAACTATTTATTTTTATATTTAAAAGGTAAAAAAATTTATATAAGGATA  
2 MT492036.1 TATTTTATATTTCTAACAATAAACCCCATAAAAACCCCTAAAATTTCTTACATAAATAACTATTTATTTTTATATTTAAAAGGTAAAAAAATTTATATAAGGATA  
3 MT492037.1 TATTTTATATTTCTAACAATAAACCCCATAAAAACCCCTAAAATTTCTTACATAAATAACTATTTATTTTTATATTTAAAAGGTAAAAAAATTTATATAAGGATA  
4 MT492030.1 TATTTTATATTTCTAACAATAAACCCCATAAAAACCCCTAAAATTTCTTACATAAATAACTATTTATTTTTATATTTAAAAGGTAAAAAAATTTATATAAGGATA  
5 MT492031.1 TATTTTATATTTCTAACAATAAACCCCATAAAAACCCCTAAAATTTCTTACATAAATAACTATTTATTTTTATATTTAAAAGGTAAAAAAATTTATATAAGGATA  
6 MT492032.1 TATTTTATATTTCTAACAATAAACCCCATAAAAACCCCTAAAATTTCTTACATAAATAACTATTTATTTTTATATTTAAAAGGTAAAAAAATTTATATAAGGATA  
7 MT492033.1 TATTTTATATTTCTAACAATAAACCCCATAAAAACCCCTAAAATTTCTTACATAAATAACTATTTATTTTTATATTTAAAAGGTAAAAAAATTTATATAAGGATA  
8 MT492034.1 TATTTTATATTTCTAACAATAAACCCCATAAAAACCCCTAAAATTTCTTACATAAATAACTATTTATTTTTATATTTAAAAGGTAAAAAAATTTATATAAGGATA  
9 MT492035.1 TATTTTATATTTCTAACAATAAACCCCATAAAAACCCCTAAAATTTCTTACATAAATAACTATTTATTTTTATATTTAAAAGGTAAAAAAATTTATATAAGGATA  
N M N S V I F G M F V G L I S V Y I V M M K M N F P L F I M Y P Y  
ATAAATATAAAGATTGTATTTGGGGTATTTTTGGGGATTTTAAAGAAATGATTTATTTGATAATAAAAAATATAAATTTCCATTTTTTTAATATATTCCTAT

7001

1 7100

1 MN793322.1 AGAGAAAATTAATCATATTTAAAAATCTACCTCTAATAACTCTTATAAATAAATAAAATTTATTTCTTTTTAATATAAATAAAATCTTCATCATATAAATTA  
2 MT492036.1 AGAGAAAATTAATCATATTTAAAAATCTACCTCTAATAACTCTTATAAATAAATAAAATTTATTTCTTTTTAATATAAATAAAATCTTCATCATATAAATTA  
3 MT492037.1 AGAGAAAATTAATCATATTTAAAAATCTACCTCTAATAACTCTTATAAATAAATAAAATTTATTTCTTTTTAATATAAATAAAATCTTCATCATATAAATTA  
4 MT492030.1 AGAGAAAATTAATCATATTTAAAAATCTACCTCTAATAACTCTTATAAATAAATAAAATTTATTTCTTTTTAATATAAATAAAATCTTCATCATATAAATTA  
5 MT492031.1 AGAGAAAATTAATCATATTTAAAAATCTACCTCTAATAACTCTTATAAATAAATAAAATTTATTTCTTTTTAATATAAATAAAATCTTCATCATATAAATTA  
6 MT492032.1 AGAGAAAATTAATCATATTTAAAAATCTACCTCTAATAACTCTTATAAATAAATAAAATTTATTTCTTTTTAATATAAATAAAATCTTCATCATATAAATTA  
7 MT492033.1 AGAGAAAATTAATCATATTTAAAAATCTACCTCTAATAACTCTTATAAATAAATAAAATTTATTTCTTTTTAATATAAATAAAATCTTCATCATATAAATTA  
8 MT492034.1 AGAGAAAATTAATCATATTTAAAAATCTACCTCTAATAACTCTTATAAATAAATAAAATTTATTTCTTTTTAATATAAATAAAATCTTCATCATATAAATTA  
9 MT492035.1 AGAGAAAATTAATCATATTTAAAAATCTACCTCTAATAACTCTTATAAATAAATAAAATTTATTTCTTTTTAATATAAATAAAATCTTCATCATATAAATTA  
S F I L W M L F S G S I V S M F L L I M M S K L M I F D E D Y L N  
TCTCTTTTTAATTAGTATAATTTTTAGATGGAGATTATTGAGAATATTTATTTATTTTTAATAAATAAGAAAAATTTATTTATTTTAGAAGTAGTATATTTAAT

7101

2 7200

1 MN793322.1 TAAATAGATAAATAAATTTATAATCATTAAATTTATTAATATATAGTTAAACGAAAACCTATAAAAATATAGTTAAACCTGTAGAAATATAATATAAATAAAAAA  
2 MT492036.1 TAAATAGATAAATAAATTTATAATCATTAAATTTATTAATATATAGTTAAACGAAAACCTATAAAAATATAGTTAAACCTGTAGAAATATAATATAAATAAAAAA  
3 MT492037.1 TAAATAGATAAATAAATTTATAATCATTAAATTTATTAATATATAGTTAAACGAAAACCTATAAAAATATAGTTAAACCTGTAGAAATATAATATAAATAAAAAA  
4 MT492030.1 TAAATAGATAAATAAATTTATAATCATTAAATTTATTAATATATAGTTAAACGAAAACCTATAAAAATATAGTTAAACCTGTAGAAATATAATATAAATAAAAAA  
5 MT492031.1 TAAATAGATAAATAAATTTATAATCATTAAATTTATTAATATATAGTTAAACGAAAACCTATAAAAATATAGTTAAACCTGTAGAAATATAATATAAATAAAAAA  
6 MT492032.1 TAAATAGATAAATAAATTTATAATCATTAAATTTATTAATATATAGTTAAACGAAAACCTATAAAAATATAGTTAAACCTGTAGAAATATAATATAAATAAAAAA  
7 MT492033.1 TAAATAGATAAATAAATTTATAATCATTAAATTTATTAATATATAGTTAAACGAAAACCTATAAAAATATAGTTAAACCTGTAGAAATATAATATAAATAAAAAA  
8 MT492034.1 TAAATAGATAAATAAATTTATAATCATTAAATTTATTAATATATAGTTAAACGAAAACCTATAAAAATATAGTTAAACCTGTAGAAATATAATATAAATAAAAAA  
9 MT492035.1 TAAATAGATAAATAAATTTATAATCATTAAATTTATTAATATATAGTTAAACGAAAACCTATAAAAATATAGTTAAACCTGTAGAAATATAATATAAATAAAAAA  
Y I S L L N Y D N I M L Y M T L R F S Y F M T L G T S I Y Y L L F I  
ATTTATCTATTTAATATTTAGTAATTAATAATTTATATATCAATTTGCTTTTTGATATTTTATATCAATTTGGACATCTTTATATTTATATTTATTTTTTT

7201 . . . . . : . . . . . 3 7300  
1 MN793322.1 TAAAAAATTTAAATTTCTTAACTAACTATTTCTAAAATTAATCCTTAGAATAAAACCCAGCTAAAAAAGGAATACCACATAAAGCTATATTAGACAC  
2 MT492036.1 TAAAAAATTTAAATTTCTTAACTAACTATTTCTAAAATTAATCCTTAGAATAAAACCCAGCTAAAAAAGGAATACCACATAAAGTTATATTAGACAC  
3 MT492037.1 TAAAAAATTTAAATTTCTTAACTAACTATTTCTAAAATTAATCCTTAGAATAAAACCCAGCTAAAAAAGGAATACCACATAAAGCTATATTAGACAC  
4 MT492030.1 TAAAAAATTTAAATTTCTTAACTAACTATTTCTAAAATTAATCCTTAGAATAAAACCCAGCTAAAAAAGGAATACCACATAAAGTTATATTAGACAC  
5 MT492031.1 TAAAAAATTTAAATTTCTTAACTAACTATTTCTAAAATTAATCCTTAGAATAAAACCCAGCTAAAAAAGGAATACCACATAAAGTTATATTAGACAC  
6 MT492032.1 TAAAAAATTTAAATTTCTTAACTAACTATTTCTAAAATTAATCCTTAGAATAAAACCCAGCTAAAAAAGGAATACCACATAAAGCTATATTAGACAC  
7 MT492033.1 TAAAAAATTTAAATTTCTTAACTAACTATTTCTAAAATTAATCCTTAGAATAAAACCCAGCTAAAAAAGGAATACCACATAAAGCTATATTAGACAC  
8 MT492034.1 TAAAAAATTTAAATTTCTTAACTAACTATTTCTAAAATTAATCCTTAGAATAAAACCCAGCTAAAAAAGGAATACCACATAAAGCTATATTAGACAC  
9 MT492035.1 TAAAAAATTTAAATTTCTTAACTAACTATTTCTAAAATTAATCCTTAGAATAAAACCCAGCTAAAAAAGGAATACCACATAAAGCTATATTAGACAC  
F F N L N S L S V M E L I L D K S Y F G A L F P I G C L A M N S V  
ATTTTTTTAAATTTAAAGAATTTGATTGATAAAGATTTTAAATTTAGGAATCTATTTTGGTTCGATTTTTTCTTATGGTGTATTTTCGATATAATCTGTG

7301 . . . . . : . . . . . 4 7400  
1 MN793322.1 ATTCATACATAAAGATGTCATAGGAATGAAATTTCTAATCCCCCTATAAAACGAATATCTTGAATATCTATTATTATATGAATAAATACCCAGCACAC  
2 MT492036.1 ATTCATACATAAAGATGTCATAGGAATGAAATTTCTAATCCCCCTATAAAACGAATATCTTGAATATCTATTATTATATGAATAAATACCCAGCACAC  
3 MT492037.1 ATTCATACATAAAGATGTCATAGGAATGAAATTTCTAATCCCCCTATAAAACGAATATCTTGAATATCTATTATTATATGAATAAATACCCAGCACAC  
4 MT492030.1 ATTCATACATAAAGATGTCATAGGAATGAAATTTCTAATCCCCCTATAAAACGAATATCTTGAATATCTATTATTATATGAATAAATACCCAGCACAC  
5 MT492031.1 ATTCATACATAAAGATGTCATAGGAATGAAATTTCTAATCCCCCTATAAAACGAATATCTTGAATATCTATTATTATATGAATAAATACCCAGCACAC  
6 MT492032.1 ATTCATACATAAAGATGTCATAGGAATGAAATTTCTAATCCCCCTATAAAACGAATATCTTGAATATCTATTATTATATGAATAAATACCCAGCACAC  
7 MT492033.1 ATTCATACATAAAGATGTCATAGGAATGAAATTTCTAATCCCCCTATAAAACGAATATCTTGAATATCTATTATTATATGAATAAATACCCAGCACAC  
8 MT492034.1 ATTCATACATAAAGATGTCATAGGAATGAAATTTCTAATCCCCCTATAAAACGAATATCTTGAATATCTATTATTATATGAATAAATACCCAGCACAC  
9 MT492035.1 ATTCATACATAAAGATGTCATAGGAATGAAATTTCTAATCCCCCTATAAAACGAATATCTTGAATATCTATTATTATATGAATAAATACCCAGCACAC  
N M C L S T M P I F N S I G M F R I D Q I D M M M H I I V G A C  
TAAGTATGATTTCTACAGTATCCTTACTTTAAAGATTAGGGGGATATTTTGCTTATAGAACTTATAGATAAATAATACTTATTATTGGGGTCTGTG

7401 . . . . . : . . . . . 5 7500  
1 MN793322.1 ATAAATAATAAAGCCTTAAATATAGCATGAGTTAATAAATGAAAAAAGCTAAATCTGGTATTCCATTCTTAAAATTTCTATTATTAATCCTAATTGTC  
2 MT492036.1 ATAAATAATAAAGCCTTAAATATAGCATGAGTTAATAAATGAAAAAAGCTAAATCTGGTATTCCATTCTTAAAATTTCTATTATTAATCCTAATTGTC  
3 MT492037.1 ATAAATAATAAAGCCTTAAATATAGCATGAGTTAATAAATGAAAAAAGCTAAATCTGGTATTCCATTCTTAAAATTTCTATTATTAATCCTAATTGTC  
4 MT492030.1 ATAAATAATAAAGCCTTAAATATAGCATGAGTTAATAAATGAAAAAAGCTAAATCTGGTATTCCATTCTTAAAATTTCTATTATTAATCCTAATTGTC  
5 MT492031.1 ATAAATAATAAAGCCTTAAATATAGCATGAGTTAATAAATGAAAAAAGCTAAATCTGGTATTCCATTCTTAAAATTTCTATTATTAATCCTAATTGTC  
6 MT492032.1 ATAAATAATAAAGCCTTAAATATAGCATGAGTTAATAAATGAAAAAAGCTAAATCTGGTATTCCATTCTTAAAATTTCTATTATTAATCCTAATTGTC  
7 MT492033.1 ATAAATAATAAAGCCTTAAATATAGCATGAGTTAATAAATGAAAAAAGCTAAATCTGGTATTCCATTCTTAAAATTTCTATTATTAATCCTAATTGTC  
8 MT492034.1 ATAAATAATAAAGCCTTAAATATAGCATGAGTTAATAAATGAAAAAAGCTAAATCTGGTATTCCATTCTTAAAATTTCTATTATTAATCCTAATTGTC  
9 MT492035.1 ATAAATAATAAAGCCTTAAATATAGCATGAGTTAATAAATGAAAAAAGCTAAATCTGGTATTCCATTCTTAAAATTTCTATTATTAATCCTAATTGTC  
M F L L A K F M A H T L L H F F A L D P M G M S L I S M M L G L Q S  
TATTTATTATTTCGGAATTTATATCGTACTCAATTTATTTCTTTTTTCGATTTAGACCATAAGGATAAGAATTTTAAAGATAAATAATTAGGATTAACAG

7501 . . . . . : . . . . . 6 7600  
1 MN793322.1 TTAAAGTCGATAAAGCAATAAATTTTTTTTAAATCAAACCTCATAATTAGCAGAAATACCAGCTATAAAACATAGTTAAACCAGATAAATAAATAAAAAATTTT  
2 MT492036.1 TTAAAGTCGATAAAGCAATAAATTTTTTTTAAATCAAACCTCATAATTAGCAGAAATACCAGCTATAAAACATAGTTAAACCAGATAAATAAATAAAAAATTTT  
3 MT492037.1 TTAAAGTCGATAAAGCAATAAATTTTTTTTAAATCAAACCTCATAATTAGCAGAAATACCAGCTATAAAACATAGTTAAACCAGATAAATAAATAAAAAATTTT  
4 MT492030.1 TTAAAGTCGATAAAGCAATAAATTTTTTTTAAATCAAACCTCATAATTAGCAGAAATACCAGCTATAAAACATAGTTAAACCAGATAAATAAATAAAAAATTTT  
5 MT492031.1 TTAAAGTCGATAAAGCAATAAATTTTTTTTAAATCAAACCTCATAATTAGCAGAAATACCAGCTATAAAACATAGTTAAACCAGATAAATAAATAAAAAATTTT  
6 MT492032.1 TTAAAGTCGATAAAGCAATAAATTTTTTTTAAATCAAACCTCATAATTAGCAGAAATACCAGCTATAAAACATAGTTAAACCAGATAAATAAATAAAAAATTTT  
7 MT492033.1 TTAAAGTCGATAAAGCAATAAATTTTTTTTAAATCAAACCTCATAATTAGCAGAAATACCAGCTATAAAACATAGTTAAACCAGATAAATAAATAAAAAATTTT  
8 MT492034.1 TTAAAGTCGATAAAGCAATAAATTTTTTTTAAATCAAACCTCATAATTAGCAGAAATACCAGCTATAAAACATAGTTAAACCAGATAAATAAATAAAAAATTTT  
9 MT492035.1 TTAAAGTCGATAAAGCAATAAATTTTTTTTAAATCAAACCTCATAATTAGCAGAAATACCAGCTATAAAACATAGTTAAACCAGATAAATAAATAAAAAATTTT  
L T S L A I I K K L D F E Y N A S I G A M F M T L G S L L L L I K  
AATTTTCAGCTATTTTCGTTATTAATAAAAAATTTAGTTTGGATTAATATCGTCTTTATGGTTCGATATTTGTATCAATTTGGTCTATTATTATTATTTTAAAA

7601 . . . . . : . . . . . 7 7700  
1 MN793322.1 AATAAATATTATATCTAGTAATAAAAAATTTAAAACGAATTAATAAATAAATACCCGCAGTAACATAAGTAGATGAATGAACATAAGCAGAACTGGGGTA  
2 MT492036.1 AATAAATATTATATCTAGTAATAAAAAATTTAAAACGAATTAATAAATAAATACCCGCAGTAACATAAGTAGATGAATGAACATAAGCAGAACTGGGGTA  
3 MT492037.1 AATAAATATTATATCTAATAATAAAAAATTTAAAACGAATTAATAAATAAATACCCGCAGTAACATAAGTAGATGAATGAACATAAGCAGAACTGGGGTA  
4 MT492030.1 AATAAATATTATATCTAGTAATAAAAAATTTAAAACGAATTAATAAATAAATACCCGCAGTAACATAAGTAGATGAATGAACATAAGCAGAACTGGGGTA  
5 MT492031.1 AATAAATATTATATCTAGTAATAAAAAATTTAAAACGAATTAATAAATAAATACCCGCAGTAACATAAGTAGATGAATGAACATAAGCAGAACTGGGGTA  
6 MT492032.1 AATAAATATTATATCTAATAATAAAAAATTTAAAACGAATTAATAAATAAATACCCGCAGTAACATAAGTAGATGAATGAACATAAGCAGAACTGGGGTA  
7 MT492033.1 AATAAATATTATATCTAGTAATAAAAAATTTAAAACGAATTAATAAATAAATACCCGCAGTAACATAAGTAGATGAATGAACATAAGCAGAACTGGGGTA  
8 MT492034.1 AATAAATATTATATCTAATAATAAAAAATTTAAAACGAATTAATAAATAAATACCCGCAGTAACATAAGTAGATGAATGAACATAAGCAGAACTGGGGTA  
9 MT492035.1 AATAAATATTATATCTAATAATAAAAAATTTAAAACGAATTAATAAATAAATACCCGCAGTAACATAAGTAGATGAATGAACATAAGCAGAACTGGGGTA  
I F M M D L L L F N F R I L L Y I G A T V L T S S H V L A S V P T  
TTATTTATAATATAGATCATTATTTTTTAATTTTGCTTAATTTATTTATTTATGGGGCTATTGATTTTCATCTACTTACTTGATTTTCGTCTTTGACCCCAT

7701 . . . . . : . . . . . 8 7800  
1 MN793322.1 GGAGCTGCTATAGCAGCTGGTAATCAGGAACATAAAAGGAATTTGAGCAGCTTTAGTTATAGCAGCAATAATAATTATAATTCTAATTATAAATATTGAAT  
2 MT492036.1 GGAGCTGCTATAGCAGCTGGTAATCAGGAACATAAAAGGAATTTGAGCAGCTTTAGTTATAGCAGCAATAATAATTATAATTCTAATTATAAATATTGAAT  
3 MT492037.1 GGAGCTGCTATAGCAGCTGGTAATCAGGAACATAAAAGGAATTTGAGCAGCTTTAGTTATAGCAGCAATAATAATTATAATTCTAATTATAAATATTGAAT  
4 MT492030.1 GGAGCTGCTATAGCAGCTGGTAATCAGGAACATAAAAGGAATTTGAGCAGCTTTAGTTATAGCAGCAATAATAATTATAATTCTAATTATAAATATTGAAT  
5 MT492031.1 GGAGCTGCTATAGCAGCTGGTAATCAGGAACATAAAAGGAATTTGAGCAGCTTTAGTTATAGCAGCAATAATAATTATAATTCTAATTATAAATATTGAAT  
6 MT492032.1 GGAGCTGCTATAGCAGCTGGTAATCAGGAACATAAAAGGAATTTGAGCAGCTTTAGTTATAGCAGCAATAATAATTATAATTCTAATTATAAATATTGAAT  
7 MT492033.1 GGAGCTGCTATAGCAGCTGGTAATCAGGAACATAAAAGGAATTTGAGCAGCTTTAGTTATAGCAGCAATAATAATTATAATTCTAATTATAAATATTGAAT  
8 MT492034.1 GGAGCTGCTATAGCAGCTGGTAATCAGGAACATAAAAGGAATTTGAGCAGCTTTAGTTATAGCAGCAATAATAATTATAATTCTAATTATAAATATTGAAT  
9 MT492035.1 GGAGCTGCTATAGCAGCTGGTAATCAGGAACATAAAAGGAATTTGAGCAGCTTTAGTTATAGCAGCAATAATAATTATAATTCTAATTATAAATATTGAAT  
P A A M A A P L W S S F P I Q A S K T M A A I I I M I S I M F M S Y  
CCTCGACGATATCGTCGACCATTAGTCCTTGATTTTCCTTAAACTCGTGAAATCAATATCGTCGTTATTATTAATATTAAGATTAATATTTATAACTTA

7801 . . . . . : . . . . . 9 7900  
1 MN793322.1 AATCATTTTTTATAAAAAGATAAAATAAAATAAATAATTTTCATCTACCATAATTTATTATTCAACCAATTACCATTAAAAATAAATAAATCCCCAATTCGATT  
2 MT492036.1 AATCATTTTTTATAAAAAGATAAAATAAAATAAATAATTTTCATCTACCATAATTTATTATTCAACCAATTACCATTAAAAATAAATAAATCCCCAATTCGATT  
3 MT492037.1 AATCATTTTTTATAAAAAGATAAAATAAAATAAATAATTTTCATCTACCATAATTTATTATTCAACCAATTACCATTAAAAATAAATAAATCCCCAATTCGATT  
4 MT492030.1 AATCATTTTTTATAAAAAGATAAAATAAAATAAATAATTTTCATCTACCATAATTTATTATTCAACCAATTACCATTAAAAATAAATAAATCCCCAATTCGATT  
5 MT492031.1 AATCATTTTTTATAAAAAGATAAAATAAAATAAATAATTTTCATCTACCATAATTTATTATTCAACCAATTACCATTAAAAATAAATAAATCCCCAATTCGATT  
6 MT492032.1 AATCATTTTTTATAAAAAGATAAAATAAAATAAATAATTTTCATCTACCATAATTTATTATTCAACCAATTACCATTAAAAATAAATAAATCCCCAATTCGATT  
7 MT492033.1 AATCATTTTTTATAAAAAGATAAAATAAAATAAATAATTTTCATCTACCATAATTTATTATTCAACCAATTACCATTAAAAATAAATAAATCCCCAATTCGATT  
8 MT492034.1 AATCATTTTTTATAAAAAGATAAAATAAAATAAATAATTTTCATCTACCATAATTTATTATTCAACCAATTACCATTAAAAATAAATAAATCCCCAATTCGATT  
9 MT492035.1 AATCATTTTTTATAAAAAGATAAAATAAAATAAATAATTTTCATCTACCATAATTTATTATTCAACCAATTACCATTAAAAATAAATAAATCCCCAATTCGATT  
D N K M F S L Y F L Y N W S G Y N M M W G I V M L I F L D G I R N  
TTAGTAAAAAATATTTCTATTTATTTATTTATTTAAAGTAGATGGTATTAATAATAAAGTTGGTAAATGGTAATTTTATTTATTTAGGGGTAAAGCTAA

7901 . . . . . : . . . . . 0 8000  
1 MN793322.1 AGATAAAGCAGTTAATATACCAGCATTATAAGATTTAATATTTTGATAATAAATAACCAAAACAATAAGAACTAAACCTAAACCATCTCAACCTAATAAAA  
2 MT492036.1 AGATAAAGCAGTTAATATACCAGCATTATAAGATTTAATATTTTGATAATAAATAACCAAAACAATAAGAACTAAACCTAAACCATCTCAACCTAATAAAA  
3 MT492037.1 AGATAAAGCAGTTAATATACCAGCATTATAAGATTTAATATTTTGATAATAAATAACCAAAACAATAAGAACTAAACCTAAACCATCTCAACCTAATAAAA  
4 MT492030.1 AGATAAAGCAGTTAATATACCAGCATTATAAGATTTAATATTTTGATAATAAATAACCAAAACAATAAGAACTAAACCTAAACCATCTCAACCTAATAAAA  
5 MT492031.1 AGATAAAGCAGTTAATATACCAGCATTATAAGATTTAATATTTTGATAATAAATAACCAAAACAATAAGAACTAAACCTAAACCATCTCAACCTAATAAAA  
6 MT492032.1 AGATAAAGCAGTTAATATACCAGCATTATAAGATTTAATATTTTGATAATAAATAACCAAAACAATAAGAACTAAACCTAAACCATCTCAACCTAATAAAA  
7 MT492033.1 AGATAAAGCAGTTAATATACCAGCATTATAAGATTTAATATTTTGATAATAAATAACCAAAACAATAAGAACTAAACCTAAACCATCTCAACCTAATAAAA  
8 MT492034.1 AGATAAAGCAGTTAATATACCAGCATTATAAGATTTAATATTTTGATAATAAATAACCAAAACAATAAGAACTAAACCTAAACCATCTCAACCTAATAAAA  
9 MT492035.1 AGATAAAGCAGTTAATATACCAGCATTATAAGATTTAATATTTTGATAATAAATAACCAAAACAATAAGAACTAAACCTAAACCATCTCAACCTAATAAAA  
S L A T L M G A N Y S K I N Q Y Y I V L C Y S V L G L G D W G L L

TCTATTTTCGTCAATTATATGGTCGTAATATTCTAAATTATAAACTATTATTTATTGGTTTGTTATTCTTTGATTTGGATTTGGTAGAGTTGGATTATTT

8001

1 8100

1 MN793322.1 ATTCTTACAATATTTGGACTAATAATTAATAAAATTATTGAAAAACAAATAATAAACTAAAATAATAAAACGATTTAAATTTAATTCAGAATTTATAT  
2 MT492036.1 ATTCTTACAATATTTGGACTAATAATTAATAAAATTATTGAAAAACAAATAATAAACTAAAATAATAAAACGATTTAAATTTAATTCAGAATTTATAT  
3 MT492037.1 ATTCTTACAATATTTGGACTAATAATTAATAAAATTATTGAAAAACAAATAATAAACTAAAATAATAAAACGATTTAAATTTAATTCAGAATTTATAT  
4 MT492030.1 ATTCTTACAATATTTGGACTAATAATTAATAAAATTATTGAAAAACAAATAATAAACTAAAATAATAAAACGATTTAAATTTAATTCAGAATTTATAT  
5 MT492031.1 ATTCTTACAATATTTGGACTAATAATTAATAAAATTATTGAAAAACAAATAATAAACTAAAATAATAAAACGATTTAAATTTAATTCAGAATTTATAT  
6 MT492032.1 ATTCTTACAATATTTGGACTAATAATTAATAAAATTATTGAAAAACAAATAATAAACTAAAATAATAAAACGATTTAAATTTAATTCAGAATTTATAT  
7 MT492033.1 ATTCTTACAATATTTGGACTAATAATTAATAAAATTATTGAAAAACAAATAATAAACTAAAATAATAAAACGATTTAAATTTAATTCAGAATTTATAT  
8 MT492034.1 ATTCTTACAATATTTGGACTAATAATTAATAAAATTATTGAAAAACAAATAATAAACTAAAATAATAAAACGATTTAAATTTAATTCAGAATTTATAT  
9 MT492035.1 ATTCTTACAATATTTGGACTAATAATTAATAAAATTATTGAAAAACAAATAATAAACTAAAATAATAAAACGATTTAAATTTAATTCAGAATTTATAT  
I S V I N P S I I L L I M S F V F L L V L I I F R N L N L E S N M Y  
TAAGAAATGTTATAAACCTGATTATTAATTATTTAATAACTTTTTTGTTTATTATTTTGATTTTATTATTTTGCTAAATTTAAATTAAGTCTTAAATATA

8101

2 8200

1 MN793322.1 ATCTTTTACTATAATAAAATTACAACGAAGAAATTAACGAAACAAATATTTATAAATAATAAAGATATTCATCCAATAAAAATTCCTTATAATAACTCTTAA  
2 MT492036.1 ATCTTTTACTATAATAAAATTACAACGAAGAAATTAACGAAACAAATATTTATAAATAATAAAGATATTCATCCAATAAAAATTCCTTATAATAACTCTTAA  
3 MT492037.1 ATCTTTTACTATAATAAAATTACAACGAAGAAATTAACGAAACAAATATTTATAAATAATAAAGATATTCATCCAATAAAAATTCCTTATAATAACTCTTAA  
4 MT492030.1 ATCTTTTACTATAATAAAATTACAACGAAGAAATTAACGAAACAAATATTTATAAATAATAAAGATATTCATCCAATAAAAATTCCTTATAATAACTCTTAA  
5 MT492031.1 ATCTTTTACTATAATAAAATTACAACGAAGAAATTAACGAAACAAATATTTATAAATAATAAAGATATTCATCCAATAAAAATTCCTTATAATAACTCTTAA  
6 MT492032.1 ATCTTTTACTATAATAAAATTACAACGAAGAAATTAACGAAACAAATATTTATAAATAATAAAGATATTCATCCAATAAAAATTCCTTATAATAACTCTTAA  
7 MT492033.1 ATCTTTTACTATAATAAAATTACAACGAAGAAATTAACGAAACAAATATTTATAAATAATAAAGATATTCATCCAATAAAAATTCCTTATAATAACTCTTAA  
8 MT492034.1 ATCTTTTACTATAATAAAATTACAACGAAGAAATTAACGAAACAAATATTTATAAATAATAAAGATATTCATCCAATAAAAATTCCTTATAATAACTCTTAA  
9 MT492035.1 ATCTTTTACTATAATAAAATTACAACGAAGAAATTAACGAAACAAATATTTATAAATAATAAAGATATTCATCCAATAAAAATTCCTTATAATAACTCTTAA  
S K S Y Y I V V S S I L S V F M M F L L S M W D L L I S M I V S L  
TAGAAAATGATATTATTTAATGTTGACTTCTTTAATGCTTTGTTTATAATATTTTATTATTTCTATAAGTTAGGTATTTTAAAGATATTATTGAGAATT

8201

3 8300

1 MN793322.1 AGAATTAAGAAATAAATTTCCCACTCTAAAATAATAAATAATATTATTCATAATAAAAATAAATTAATCTATAAAAAAATTTATTAATCTAAAAAAAATAAA  
2 MT492036.1 AGAATTAAGAAATAAATTTCCCACTCTAAAATAATAAATAATATTATTCATAATAAAAATAAATTAATCTATAAAAAAATTTATTAATCTAAAAAAAATAAA  
3 MT492037.1 AGAATTAAGAAATAAATTTCCCACTCTAAAATAATAAATAATATTATTCATAATAAAAATAAATTAATCTATAAAAAAATTTATTAATCTAAAAAAAATAAA  
4 MT492030.1 AGAATTAAGAAATAAATTTCCCACTCTAAAATAATAAATAATATTATTCATAATAAAAATAAATTAATCTATAAAAAAATTTATTAATCTAAAAAAAATAAA  
5 MT492031.1 AGAATTAAGAAATAAATTTCCCACTCTAAAATAATAAATAATATTATTCATAATAAAAATAAATTAATCTATAAAAAAATTTATTAATCTAAAAAAAATAAA  
6 MT492032.1 AGAATTAAGAAATAAATTTCCCACTCTAAAATAATAAATAATATTATTCATAATAAAAATAAATTAATCTATAAAAAAATTTATTAATCTAAAAAAAATAAA  
7 MT492033.1 AGAATTAAGAAATAAATTTCCCACTCTAAAATAATAAATAATATTATTCATAATAAAAATAAATTAATCTATAAAAAAATTTATTAATCTAAAAAAAATAAA  
8 MT492034.1 AGAATTAAGAAATAAATTTCCCACTCTAAAATAATAAATAATATTATTCATAATAAAAATAAATTAATCTATAAAAAAATTTATTAATCTAAAAAAAATAAA  
9 MT492035.1 AGAATTAAGAAATAAATTTCCCACTCTAAAATAATAAATAATATTATTCATAATAAAAATAAATTAATCTATAAAAAAATTTATTAATCTAAAAAAAATAAA  
S N F S I I E W E L I I I I N N M I F Y I V M F F N M L S F F F L  
TCTTAATTTTCTTTATTAAGGGTGAGATTTTATTATTATTATAAAGTATTATTTTATTTAATGATATTTTAAATAAATAGATTTTATTTTATTT

8301

4 8400

1 MN793322.1 AAAAAAATCTAATAAAACAAATGAAAATTTTGAATAACCTAAAATGATATCTATCATATTTTGAACCACAAATCAATATTTTAAATTTAAATTTATT  
2 MT492036.1 AAAAAAATCTAATAAAACAAATGAAAATTTTGAATAACCTAAAATGATATTATCATATTTTGAACCACAAATCAATATTTTAAATTTAAATTTATT  
3 MT492037.1 AAAAAAATCTAATAAAACAAATGAAAATTTTGAATAACCTAAAATGATATTATCATATTTTGAACCACAAATCAATATTTTAAATTTAAATTTATT  
4 MT492030.1 AAAAAAATCTAATAAAACAAATGAAAATTTTGAATAACCTAAAATGATATTATCATATTTTGAACCACAAATCAATATTTTAAATTTAAATTTATT  
5 MT492031.1 AAAAAAATCTAATAAAACAAATGAAAATTTTGAATAACCTAAAATGATATTATCATATTTTGAACCACAAATCAATATTTTAAATTTAAATTTATT  
6 MT492032.1 AAAAAAATCTAATAAAACAAATGAAAATTTTGAATAACCTAAAATGATATTATCATATTTTGAACCACAAATCAATATTTTAAATTTAAATTTATT  
7 MT492033.1 AAAAAAATCTAATAAAACAAATGAAAATTTTGAATAACCTAAAATGATATTATCATATTTTGAACCACAAATCAATATTTTAAATTTAAATTTATT  
8 MT492034.1 AAAAAAATCTAATAAAACAAATGAAAATTTTGAATAACCTAAAATGATATTATCATATTTTGAACCACAAATCAATATTTTAAATTTAAATTTATT  
9 MT492035.1 AAAAAAATCTAATAAAACAAATGAAAATTTTGAATAACCTAAAATGATATTATCATATTTTGAACCACAAATCAATATTTTAAATTTAAATTTATT  
F F F S I F C M tggatcttactatgatagataaaaaacttgggtgttagttataaaattaaaatttaataa





TTTTAGTAGTATTGGAATAACTTCCATAATTTAAATAATATGGAATAATTTATTTATTAGAAGCTGATAAAATTYGCAAGTATTAATTATAATCGATTTGT

8801

9 8900

1 MN793322.1 AAATATTCCTGAAGAACATAAAACCATGACCAATCATTTAAAATATATGAACCAATAAACCCCAATAATTTATTGTTATAATACCCCAATTACTATTCTT  
2 MT492036.1 AAATATTCCTGAAGAACATAAAACCATGACCAATCATTTAAAATATATGAACCAATAAACCCCAATAATTTATTGTTATAATACCCCAATTACTATTCTT  
3 MT492037.1 AAATATTCCTGAAGAACATAAAACCATGACCAATCATTTAAAATATATGAACCAATAAACCCCAATAATTTATTGTTATAATACCCCAATTACTATTCTT  
4 MT492030.1 AAATATTCCTGAAGAACATAAAACCATGACCAATCATTTAAAATATATGAACCAATAAACCCCAATAATTTATTGTTATAATACCCCAATTACTATTCTT  
5 MT492031.1 AAATATTCCTGAAGAACATAAAACCATGACCAATCATTTAAAATATATGAACCAATAAACCCCAATAATTTATTGTTATAATACCCCAATTACTATTCTT  
6 MT492032.1 AAATATTCCTGAAGAACATAAAACCATGACCAATCATTTAAAATATATGAACCAATAAACCCCAATAATTTATTGTTATAATACCCCAATTACTATTCTT  
7 MT492033.1 AAATATTCCTGAAGAACATAAAACCATGACCAATCATTTAAAATATATGAACCAATAAACCCCAATAATTTATTGTTATAATACCCCAATTACTATTCTT  
8 MT492034.1 AAATATTCCTGAAGAACATAAAACCATGACCAATCATTTAAAATATATGAACCAATAAACCCCAATAATTTATTGTTATAATACCCCAATTACTATTCTT  
9 MT492035.1 AAATATTCCTGAAGAACATAAAACCATGACCAATCATTTAAAATATATGAACCAATAAACCCCAATAATTTATTGTTATAATACCCCAATTACTATTCTT

F M G S S C L G H G I M L I Y S G I F G W Y N M T M I G G I V M S  
TTTATAAGGACTTCTTGTATTGGTACTGGTTAGTAATTTTATATACTTGGTTATTTGGGGTTATTAATAACAATATTATGGGGTTAATGATAAGAA

8901

0 9000

1 MN793322.1 ATATGTGCAACCGAAGAATAAGCAATTAAGATTTAATATCAACTTGACAAAAACATTTTAACTAATATAAAAATCCTCCAACCTAATCTAATAATAATTC  
2 MT492036.1 ATATGTGCAACCGAAGAATAAGCAATTAAGATTTAATATCAACTTGACAAAAACATTTTAACTAATATAAAAATCCTCCAACCTAATCTAATAATAATTC  
3 MT492037.1 ATATGTGCAACCGAAGAATAAGCAATTAAGATTTAATATCAACTTGACAAAAACATTTTAACTAATATAAAAATCCTCCAACCTAATCTAATAATAATTC  
4 MT492030.1 ATATGTGCAACCGAAGAATAAGCAATTAAGATTTAATATCAACTTGACAAAAACATTTTAACTAATATAAAAATCCTCCAACCTAATCTAATAATAATTC  
5 MT492031.1 ATATGTGCAACCGAAGAATAAGCAATTAAGATTTAATATCAACTTGACAAAAACATTTTAACTAATATAAAAATCCTCCAACCTAATCTAATAATAATTC  
6 MT492032.1 ATATGTGCAACCGAAGAATAAGCAATTAAGATTTAATATCAACTTGACAAAAACATTTTAACTAATATAAAAATCCTCCAACCTAATCTAATAATAATTC  
7 MT492033.1 ATATGTGCAACCGAAGAATAAGCAATTAAGATTTAATATCAACTTGACAAAAACATTTTAACTAATATAAAAATCCTCCAACCTAATCTAATAATAATTC  
8 MT492034.1 ATATGTGCAACCGAAGAATAAGCAATTAAGATTTAATATCAACTTGACAAAAACATTTTAACTAATATAAAAATCCTCCAACCTAATCTAATAATAATTC  
9 MT492035.1 ATATGTGCAACCGAAGAATAAGCAATTAAGATTTAATATCAACTTGACAAAAACATTTTAACTAATATAAAAATCCTCCAACCTAATCTAATAATAATTC

M H A V S S Y A I L S K I D V Q C F C K L S I Y F G G V L S I I I W  
TATACAGTTGGCTTCTTATTCGTTAATTTCTAAATTTATAGTTGAAGTGTTTTGTAAAAATTTGATTATATTTTAGGAGTTGATTAGATTATTATTAAG

9001

1 9100

1 MN793322.1 AAATAATATTTAACTTTAAACCCAATCTTTGAAATATAATTATAAATACGTAATATTTCCATAACCTCCTAATTTTAAATATAATACCCGCTAAAATTTATTGA  
2 MT492036.1 AAATAATATTTAACTTTAAACCCAATCTTTGAAATATAATTATAAATACGTAATATTTCCATAACCTCCTAATTTTAAATATAATACCCGCTAAAATTTATTGA  
3 MT492037.1 AAATAATATTTAACTTTAAACCCAATCTTTGAAATATAATTATAAATACGTAATATTTCCATAACCTCCTAATTTTAAATATAATACCCGCTAAAATTTATTGA  
4 MT492030.1 AAATAATATTTAACTTTAAACCCAATCTTTGAAATATAATTATAAATACGTAATATTTCCATAACCTCCTAATTTTAAATATAATACCCGCTAAAATTTATTGA  
5 MT492031.1 AAATAATATTTAACTTTAAACCCAATCTTTGAAATATAATTATAAATACGTAATATTTCCATAACCTCCTAATTTTAAATATAATACCCGCTAAAATTTATTGA  
6 MT492032.1 AAATAATATTTAACTTTAAACCCAATCTTTGAAATATAATTATAAATACGTAATATTTCCATAACCTCCTAATTTTAAATATAATACCCGCTAAAATTTATTGA  
7 MT492033.1 AAATAATATTTAACTTTAAACCCAATCTTTGAAATATAATTATAAATACGTAATATTTCCATAACCTCCTAATTTTAAATATAATACCCGCTAAAATTTATTGA  
8 MT492034.1 AAATAATATTTAACTTTAAACCCAATCTTTGAAATATAATTATAAATACGTAATATTTCCATAACCTCCTAATTTTAAATATAATACCCGCTAAAATTTATTGA  
9 MT492035.1 AAATAATATTTAACTTTAAACCCAATCTTTGAAATATAATTATAAATACGTAATATTTCCATAACCTCCTAATTTTAAATATAATACCCGCTAAAATTTATTGA

I I N F K L G L S Q F M I A I R L M G Y G G L K L M I G A L I M S  
TTTATTATAATTTGAAATTTGGGTTAGAACTTTTATATTAATATTATGCATTATAAGGTATTGGAGGATTTAAATTTATATTATGGGCGATTTTAATAACT

9101

2 9200

1 MN793322.1 ACCTGATACAGGAGCTTCAACATGAGCTTTTGGTAATCATAAATGAACAAAATATATAGGTATTTTAACTAAAAATGCTATTATTATACAAAAATATAAT  
2 MT492036.1 ACCTGATACAGGAGCTTCAACATGAGCTTTTGGTAATCATAAATGAACAAAATATATAGGTATTTTAACTAAAAATGCTATTATTATACAAAAATATAAT  
3 MT492037.1 ACCTGATACAGGAGCTTCAACATGAGCTTTTGGTAATCATAAATGAACAAAATATATAGGTATTTTAACTAAAAATGCTATTATTATACAAAAATATAAT  
4 MT492030.1 ACCTGATACAGGAGCTTCAACATGAGCTTTTGGTAATCATAAATGAACAAAATATATAGGTATTTTAACTAAAAATGCTATTATTATACAAAAATATAAT  
5 MT492031.1 ACCTGATACAGGAGCTTCAACATGAGCTTTTGGTAATCATAAATGAACAAAATATATAGGTATTTTAACTAAAAATGCTATTATTATACAAAAATATAAT  
6 MT492032.1 ACCTGATACAGGAGCTTCAACATGAGCTTTTGGTAATCATAAATGAACAAAATATATAGGTATTTTAACTAAAAATGCTATTATTATACAAAAATATAAT  
7 MT492033.1 ACCTGATACAGGAGCTTCAACATGAGCTTTTGGTAATCATAAATGAACAAAATATATAGGTATTTTAACTAAAAATGCTATTATTATACAAAAATATAAT  
8 MT492034.1 ACCTGATACAGGAGCTTCAACATGAGCTTTTGGTAATCATAAATGAACAAAATATATAGGTATTTTAACTAAAAATGCTATTATTATACAAAAATATAAT  
9 MT492035.1 ACCTGATACAGGAGCTTCAACATGAGCTTTTGGTAATCATAAATGAACAAAATATATAGGTATTTTAACTAAAAATGCTATTATTATACAAAAATATAAT

G S V P A E V H A K P L W L H V F Y M P M K V L F A M M M C F Y L



TAAAATATATTTAAAAAGATCGATATTAATAATTTTATGTTTAAAGTTATTTTAAATTTGGTATACTATTATATAGTGTCTCATATATATAG

9601

7 9700

1 MN793322.1 TTAAATTACAATAATTTTCAATATTAACCATTAATTTATAAACATAAACATTATTAATAATAATATTTTGAACCATTCAATACATATTAACATTA  
2 MT492036.1 TTAAATTACAATAATTTTCAATATTAACCATTAATTTATAAACATAAACATTATTAATAATAATATTTTGAACCATTCAATACATATTAACATTA  
3 MT492037.1 TTAAATTACAATAATTTTCAATATTAACCATTAATTTATAAACATAAACATTATTAATAATAATATTTTGAACCATTCAATACATATTAACATTA  
4 MT492030.1 TTAAATTACAATAATTTTCAATATTAACCATTAATTTATAAACATAAACATTATTAATAATAATATTTTGAACCATTCAATACATATTAACATTA  
5 MT492031.1 TTAAATTACAATAATTTTCAATATTAACCATTAATTTATAAACATAAACATTATTAATAATAATATTTTGAACCATTCAATACATATTAACATTA  
6 MT492032.1 TTAAATTACAATAATTTTCAATATTAACCATTAATTTATAAACATAAACATTATTAATAATAATATTTTGAACCATTCAATACATATTAACATTA  
7 MT492033.1 TTAAATTACAATAATTTTCAATATTAACCATTAATTTATAAACATAAACATTATTAATAATAATATTTTGAACCATTCAATACATATTAACATTA  
8 MT492034.1 TTAAATTACAATAATTTTCAATATTAACCATTAATTTATAAACATAAACATTATTAATAATAATATTTTGAACCATTCAATACATATTAACATTA  
9 MT492035.1 TTAAATTACAATAATTTTCAATATTAACCATTAATTTATAAACATAAACATTATTAATAATAATATTTTGAACCATTCAATACATATTAACATTA  
L N C Y N E I N V M L N M F M F M M L F L M M Q V M W Y M N V N F  
AATTTAATGTTATTAATAAGTTATAATTTGGTAATTTAAATATTTGTATTTGTAATAATTTTATTATAATAAACTTGGTAAGTTATGTATAATTTGTAATTT

9701

8 9800

1 MN793322.1 ACATAAAGGAATTATAAAAAATTTATTATAAATAAAAAATTTTATCATTTTTTAAATTAAACTATATTAATAAACTTTGAAAATAATCATTACCATGAGTACGGAT  
2 MT492036.1 ACATAAAGGAATTATAAAAAATTTATTATAAATAAAAAATTTTATCATTTTTTAAATTAAACTATATTAATAAACTTTGAAAATAATCATTACCATGAGTACGGAT  
3 MT492037.1 ACATAAAGGAATTATAAAAAATTTATTATAAATAAAAAATTTTATCATTTTTTAAATTAAACTATATTAATAAACTTTGAAAATAATCATTACCATGAGTACGGAT  
4 MT492030.1 ACATAAAGGAATTATAAAAAATTTATTATAAATAAAAAATTTTATCATTTTTTAAATTAAACTATATTAATAAACTTTGAAAATAATCATTACCATGAGTACGGAT  
5 MT492031.1 ACATAAAGGAATTATAAAAAATTTATTATAAATAAAAAATTTTATCATTTTTTAAATTAAACTATATTAATAAACTTTGAAAATAATCATTACCATGAGTACGGAT  
6 MT492032.1 ACATAAAGGAATTATAAAAAATTTATTATAAATAAAAAATTTTATCATTTTTTAAATTAAACTATATTAATAAACTTTGAAAATAATCATTACCATGAGTACGGAT  
7 MT492033.1 ACATAAAGGAATTATAAAAAATTTATTATAAATAAAAAATTTTATCATTTTTTAAATTAAACTATATTAATAAACTTTGAAAATAATCATTACCATGAGTACGGAT  
8 MT492034.1 ACATAAAGGAATTATAAAAAATTTATTATAAATAAAAAATTTTATCATTTTTTAAATTAAACTATATTAATAAACTTTGAAAATAATCATTACCATGAGTACGGAT  
9 MT492035.1 ACATAAAGGAATTATAAAAAATTTATTATAAATAAAAAATTTTATCATTTTTTAAATTAAACTATATTAATAAACTTTGAAAATAATCATTACCATGAGTACGGAT  
C L P I M F I M M F L F K M M \* V M N F S Q F Y D N G H T R I  
TGTATTTCCCTTAATATTTTTTAATAATATTTATTTTTTAAATA **GTA** **AAA** TTGATATAATTTTAAAACCTTTTATTAGTAATGGTACTCATGCCTA  
<- ND4 |

9801

9 9900

1 MN793322.1 TATTGAAACTAAAATAGATAGTCCTAAAGCACCCCTCACAACAGAAAAAATTAATAAACTATTAACATATATAAATCATATTTCAATATAAATTTAACATA  
2 MT492036.1 TATTGAAACTAAAATAGATAGTCCTAAAGCACCCCTCACAACAGAAAAAATTAATAAACTATTAACATATATAAATCATATTTCAATATAAATTTAACATA  
3 MT492037.1 TATTGAAACTAAAATAGATAGTCCTAAAGCACCCCTCACAACAGAAAAAATTAATAAACTATTAACATATATAAATCATATTTCAATATAAATTTAACATA  
4 MT492030.1 TATTGAAACTAAAATAGATAGTCCTAAAGCACCCCTCACAACAGAAAAAATTAATAAACTATTAACATATATAAATCATATTTCAATATAAATTTAACATA  
5 MT492031.1 TATTGAAACTAAAATAGATAGTCCTAAAGCACCCCTCACAACAGAAAAAATTAATAAACTATTAACATATATAAATCATATTTCAATATAAATTTAACATA  
6 MT492032.1 TATTGAAACTAAAATAGATAGTCCTAAAGCACCCCTCACAACAGAAAAAATTAATAAACTATTAACATATATAAATCATATTTCAATATAAATTTAACATA  
7 MT492033.1 TATTGAAACTAAAATAGATAGTCCTAAAGCACCCCTCACAACAGAAAAAATTAATAAACTATTAACATATATAAATCATATTTCAATATAAATTTAACATA  
8 MT492034.1 TATTGAAACTAAAATAGATAGTCCTAAAGCACCCCTCACAACAGAAAAAATTAATAAACTATTAACATATATAAATCATATTTCAATATAAATTTAACATA  
9 MT492035.1 TATTGAAACTAAAATAGATAGTCCTAAAGCACCCCTCACAACAGAAAAAATTAATAAACTATTAACATATATAAATCATATTTCAATATAAATTTAACATA  
M S V L I S L G L A G G E C V S F V L F V M L M Y L D Y E I Y N L M  
ATAACITTTGATTTTATCTATCAGGATTTTCGTTGGGAGTGTGTTGCTTTTTTTGATTTTTTTGATAATTTGTATATATTTAGTATAAGTTATATTAATTTGAT

9901

0 10000

1 MN793322.1 AAAATAAACAAAAAAATTTCTTAAAACAATAAATTTCTAATCTTAATAAAAACAATTAATAAATGTTTATGTTTAAAAACAAAAATTTATATTTCCCAAAAA  
2 MT492036.1 AAAATAAACAAAAAAATTTCTTAAAACAATAAATTTCTAATCTTAATAAAAACAATTAATAAATGTTTATGTTTAAAAACAAAAATTTATATTTCCCAAAAA  
3 MT492037.1 AAAATAAACAAAAAAATTTCTTAAAACAATAAATTTCTAATCTTAATAAAAACAATTAATAAATGTTTATGTTTAAAAACAAAAATTTATATTTCCCAAAAA  
4 MT492030.1 AAAATAAACAAAAAAATTTCTTAAAACAATAAATTTCTAATCTTAATAAAAACAATTAATAAATGTTTATGTTTAAAAACAAAAATTTATATTTCCCAAAAA  
5 MT492031.1 AAAATAAACAAAAAAATTTCTTAAAACAATAAATTTCTAATCTTAATAAAAACAATTAATAAATGTTTATGTTTAAAAACAAAAATTTATATTTCCCAAAAA  
6 MT492032.1 AAAATAAACAAAAAAATTTCTTAAAACAATAAATTTCTAATCTTAATAAAAACAATTAATAAATGTTTATGTTTAAAAACAAAAATTTATATTTCCCAAAAA  
7 MT492033.1 AAAATAAACAAAAAAATTTCTTAAAACAATAAATTTCTAATCTTAATAAAAACAATTAATAAATGTTTATGTTTAAAAACAAAAATTTATATTTCCCAAAAA  
8 MT492034.1 AAAATAAACAAAAAAATTTCTTAAAACAATAAATTTCTAATCTTAATAAAAACAATTAATAAATGTTTATGTTTAAAAACAAAAATTTATATTTCCCAAAAA  
9 MT492035.1 AAAATAAACAAAAAAATTTCTTAAAACAATAAATTTCTAATCTTAATAAAAACAATTAATAAATGTTTATGTTTAAAAACAAAAATTTATATTTCCCAAAAA  
F I F L F F I S L V I F E L S L L V I L L H K H K F V F I M N G F I  
TTTTATTTGTTTTTTTTTTTAAAGATTTTGTATTTAAGATTAGAATTTATTTTGTAAATTTATTTACAAATACAAATTTTGTTTTTTAAATATAAGGGTTTTT

| tRNA-Thr (UGU) ->

10001

1 10100

gtttttataatttaaaattaaaaatattggctcttgtaaaccacaaaa

1 MN793322.1 TAAATATAATAATAAAAAATAATTCCTTATATATAAAAAAATTATCATTAGTAAATGTTTTTATAAATTTAAATTTAAAAATATTTGGTCTTGTAACCAAAAA  
 2 MT492036.1 TAAATATAATAATAAAAAATAATTCCTTATATATAAAAAAATTATCATTAGTAAATGTTTTTATAAATTTAAATTTAAAAATATTTGGTCTTGTAACCAAAAA  
 3 MT492037.1 TAAATATAATAATAAAAAATAATTCCTTATATATAAAAAAATTATCATTAGTAAATGTTTTTATAAATTTAAATTTAAAAATATTTGGTCTTGTAACCAAAAA  
 4 MT492030.1 TAAATATAATAATAAAAAATAATTCCTTATATATAAAAAAATTATCATTAGTAAATGTTTTTATAAATTTAAATTTAAAAATATTTGGTCTTGTAACCAAAAA  
 5 MT492031.1 TAAATATAATAATAAAAAATAATTCCTTATATATAAAAAAATTATCATTAGTAAATGTTTTTATAAATTTAAATTTAAAAATATTTGGTCTTGTAACCAAAAA  
 6 MT492032.1 TAAATATAATAATAAAAAATAATTCCTTATATATAAAAAAATTATCATTAGTAAATGTTTTTATAAATTTAAATTTAAAAATATTTGGTCTTGTAACCAAAAA  
 7 MT492033.1 TAAATATAATAATAAAAAATAATTCCTTATATATAAAAAAATTATCATTAGTAAATGTTTTTATAAATTTAAATTTAAAAATATTTGGTCTTGTAACCAAAAA  
 8 MT492034.1 TAAATATAATAATAAAAAATAATTCCTTATATATAAAAAAATTATCATTAGTAAATGTTTTTATAAATTTAAATTTAAAAATATTTGGTCTTGTAACCAAAAA  
 9 MT492035.1 TAAATATAATAATAAAAAATAATTCCTTATATATAAAAAAATTATCATTAGTAAATGTTTTTATAAATTTAAATTTAAAAATATTTGGTCTTGTAACCAAAAA

F M I I F I I S M Y L F I M M  
 ATTTTATATTATTTTTTATTAAGAATATATATTTTTTTAATAGTA  
 <- ND4L |

| ND6 ->

10101

2 10200

taagattatttcttttaaaaact  
 1 MN793322.1 TAAGATTATTTCTTTAAAAAECTTCAAAGAAAAGAAAACTTTATCAATAATCTCCAAAATTATTATTTTTATTAACTACTCTTTGAAATTATAAAAGT  
 2 MT492036.1 TAAGATTATTTCTTTAAAAAECTTCAAAGAAAAGAAAACTTTATCAATAATCTCCAAAATTATTATTTTTATTAACTACTCTTTGAAATTATAAAAGT  
 3 MT492037.1 TAAGATTATTTCTTTAAAAAECTTCAAAGAAAAGAAAACTTTATCAATAATCTCCAAAATTATTATTTTTATTAACTACTCTTTGAAATTATAAAAGT  
 4 MT492030.1 TAAGATTATTTCTTTAAAAAECTTCAAAGAAAAGAAAACTTTATCAATAATCTCCAAAATTATTATTTTTATTAACTACTCTTTGAAATTATAAAAGT  
 5 MT492031.1 TAAGATTATTTCTTTAAAAAECTTCAAAGAAAAGAAAACTTTATCAATAATCTCCAAAATTATTATTTTTATTAACTACTCTTTGAAATTATAAAAGT  
 6 MT492032.1 TAAGATTATTTCTTTAAAAAECTTCAAAGAAAAGAAAACTTTATCAATAATCTCCAAAATTATTATTTTTATTAACTACTCTTTGAAATTATAAAAGT  
 7 MT492033.1 TAAGATTATTTCTTTAAAAAECTTCAAAGAAAAGAAAACTTTATCAATAATCTCCAAAATTATTATTTTTATTAACTACTCTTTGAAATTATAAAAGT  
 8 MT492034.1 TAAGATTATTTCTTTAAAAAECTTCAAAGAAAAGAAAACTTTATCAATAATCTCCAAAATTATTATTTTTATTAACTACTCTTTGAAATTATAAAAGT  
 9 MT492035.1 TAAGATTATTTCTTTAAAAAECTTCAAAGAAAAGAAAACTTTATCAATAATCTCCAAAATTATTATTTTTATTAACTACTCTTTGAAATTATAAAAGT

agtttcttttcttttagaagaatagttatttagaggttttaataataaaaaataatttgatgagaaac

<- tRNA-Pro (UGG) |

10201

3 10300

F I S L L I I L L S F I M L F L N H P L S M G F M I L I Q T L L T  
 1 MN793322.1 ATTTATTTCTTTATTAATTTATTTATATCATTTATTTATATTTATTCCTTAATCATCCATTATCAATAGGTTTTATAATTTTAATTCAAACATTATTAACA  
 2 MT492036.1 ATTTATTTCTTTATTAATTTATTTATATCATTTATTTATATTTATTCCTTAATCATCCATTATCAATAGGTTTTATAATTTTAATTCAAACATTATTAACA  
 3 MT492037.1 ATTTATTTCTTTATTAATTTATTTATATCATTTATTTATATTTATTCCTTAATCATCCATTATCAATAGGTTTTATAATTTTAATTCAAACATTATTAACA  
 4 MT492030.1 ATTTATTTCTTTATTAATTTATTTATATCATTTATTTATATTTATTCCTTAATCATCCATTATCAATAGGTTTTATAATTTTAATTCAAACATTATTAACA  
 5 MT492031.1 ATTTATTTCTTTATTAATTTATTTATATCATTTATTTATATTTATTCCTTAATCATCCATTATCAATAGGTTTTATAATTTTAATTCAAACATTATTAACA  
 6 MT492032.1 ATTTATTTCTTTATTAATTTATTTATATCATTTATTTATATTTATTCCTTAATCATCCATTATCAATAGGTTTTATAATTTTAATTCAAACATTATTAACA  
 7 MT492033.1 ATTTATTTCTTTATTAATTTATTTATATCATTTATTTATATTTATTCCTTAATCATCCATTATCAATAGGTTTTATAATTTTAATTCAAACATTATTAACA  
 8 MT492034.1 ATTTATTTCTTTATTAATTTATTTATATCATTTATTTATATTTATTCCTTAATCATCCATTATCAATAGGTTTTATAATTTTAATTCAAACATTATTAACA  
 9 MT492035.1 ATTTATTTCTTTATTAATTTATTTATATCATTTATTTATATTTATTCCTTAATCATCCATTATCAATAGGTTTTATAATTTTAATTCAAACATTATTAACA

10301

4 10400

C I I T S M I M K T Y W M S Y I L F L T F L G G L L V L F I Y V S  
 1 MN793322.1 TGTATTATTACAAGAATGATTATAAAAAACATATTGAATATCTTATATTTTTATTTTAACTTTCTTAGGAGGATTATTAGTCTATTATCTATGTAAGAA  
 2 MT492036.1 TGTATTATTACAAGAATGATTATAAAAAACATATTGAATATCTTATATTTTTATTTTAACTTTCTTAGGAGGATTATTAGTCTATTATCTATGTAAGAA  
 3 MT492037.1 TGTATTATTACAAGAATGATTATAAAAAACATATTGAATATCTTATATTTTTATTTTAACTTTCTTAGGAGGATTATTAGTCTATTATCTATGTAAGAA  
 4 MT492030.1 TGTATTATTACAAGAATGATTATAAAAAACATATTGAATATCTTATATTTTTATTTTAACTTTCTTAGGAGGATTATTAGTCTATTATCTATGTAAGAA  
 5 MT492031.1 TGTATTATTACAAGAATGATTATAAAAAACATATTGAATATCTTATATTTTTATTTTAACTTTCTTAGGAGGATTATTAGTCTATTATCTATGTAAGAA  
 6 MT492032.1 TGTATTATTACAAGAATGATTATAAAAAACATATTGAATATCTTATATTTTTATTTTAACTTTCTTAGGAGGATTATTAGTCTATTATCTATGTAAGAA  
 7 MT492033.1 TGTATTATTACAAGAATGATTATAAAAAACATATTGAATATCTTATATTTTTATTTTAACTTTCTTAGGAGGATTATTAGTCTATTATCTATGTAAGAA  
 8 MT492034.1 TGTATTATTACAAGAATGATTATAAAAAACATATTGAATATCTTATATTTTTATTTTAACTTTCTTAGGAGGATTATTAGTCTATTATCTATGTAAGAA  
 9 MT492035.1 TGTATTATTACAAGAATGATTATAAAAAACATATTGAATATCTTATATTTTTATTTTAACTTTCTTAGGAGGATTATTAGTCTATTATCTATGTAAGAA

10401

5 10500

S I A S N E L F K L S I S L K M L L L F N L I I I L M I S M F F N N  
 1 MN793322.1 GAATTGCATCAAATGAATTATTTAAATTATCAATTTCACTAAAAATATTATTATTTAATCTAATCATTATTTTAATAATTAGAAATATTTTTAATAA  
 2 MT492036.1 GAATTGCATCAAATGAATTATTTAAATTATCAATTTCACTAAAAATATTATTATTTAATCTAATCATTATTTTAATAATTAGAAATATTTTTAATAA  
 3 MT492037.1 GAATTGCATCAAATGAATTATTTAAATTATCAATTTCACTAAAAATATTATTATTTAATCTAATCATTATTTTAATAATTAGAAATATTTTTAATAA  
 4 MT492030.1 GAATTGCATCAAATGAATTATTTAAATTATCAATTTCACTAAAAATATTATTATTTAATCTAATCATTATTTTAATAATTAGAAATATTTTTAATAA  
 5 MT492031.1 GAATTGCATCAAATGAATTATTTAAATTATCAATTTCACTAAAAATATTATTATTTAATCTAATCATTATTTTAATAATTAGAAATATTTTTAATAA  
 6 MT492032.1 GAATTGCATCAAATGAATTATTTAAATTATCAATTTCACTAAAAATATTATTATTTAATCTAATCATTATTTTAATAATTAGAAATATTTTTAATAA  
 7 MT492033.1 GAATTGCATCAAATGAATTATTTAAATTATCAATTTCACTAAAAATATTATTATTTAATCTAATCATTATTTTAATAATTAGAAATATTTTTAATAA  
 8 MT492034.1 GAATTGCATCAAATGAATTATTTAAATTATCAATTTCACTAAAAATATTATTATTTAATCTAATCATTATTTTAATAATTAGAAATATTTTTAATAA  
 9 MT492035.1 GAATTGCATCAAATGAATTATTTAAATTATCAATTTCACTAAAAATATTATTATTTAATCTAATCATTATTTTAATAATTAGAAATATTTTTAATAA

10501

6 10600

N L Y W I N L S I N N L E M N N F F N M F L F F N N E N K I N L S  
 1 MN793322.1 TAATTTATATTGAATTAATTTAAGAATCAATAATCTAGAAATAAATAAATTTTTTAAATATATTTTTATTTTAAACGAAAATAAAATTAACCTTATCT  
 2 MT492036.1 TAATTTATATTGAATTAATTTAAGAATCAATAATCTAGAAATAAATAAATTTTTTAAATATATTTTTATTTTAAACGAAAATAAAATTAACCTTATCT  
 3 MT492037.1 TAATTTATATTGAATTAATTTAAGAATCAATAATCTAGAAATAAATAAATTTTTTAAATATATTTTTATTTTAAACGAAAATAAAATTAACCTTATCT  
 4 MT492030.1 TAATTTATATTGAATTAATTTAAGAATCAATAATCTAGAAATAAATAAATTTTTTAAATATATTTTTATTTTAAACGAAAATAAAATTAACCTTATCT  
 5 MT492031.1 TAATTTATATTGAATTAATTTAAGAATCAATAATCTAGAAATAAATAAATTTTTTAAATATATTTTTATTTTAAACGAAAATAAAATTAACCTTATCT  
 6 MT492032.1 TAATTTATATTGAATTAATTTAAGAATCAATAATCTAGAAATAAATAAATTTTTTAAATATATTTTTATTTTAAACGAAAATAAAATTAACCTTATCT  
 7 MT492033.1 TAATTTATATTGAATTAATTTAAGAATCAATAATCTAGAAATAAATAAATTTTTTAAATATATTTTTATTTTAAACGAAAATAAAATTAACCTTATCT  
 8 MT492034.1 TAATTTATATTGAATTAATTTAAGAATCAATAATCTAGAAATAAATAAATTTTTTAAATATATTTTTATTTTAAACGAAAATAAAATTAACCTTATCT  
 9 MT492035.1 TAATTTATATTGAATTAATTTAAGAATCAATAATCTAGAAATAAATAAATTTTTTAAATATATTTTTATTTTAAACGAAAATAAAATTAACCTTATCT

10601

7 10700

K L Y N N Q T F L M M M M M I I Y L F I A L I A V V K I T N I F Y  
 1 MN793322.1 AAATTATATAATAATCAAACATTTTTAATAATAATAATAAATTTATCTATTTATTATTGCGCTTAATTGCAGTAGTAAAAATCACAAATATTTTTTATG  
 2 MT492036.1 AAATTATATAATAATCAAACATTTTTAATAATAATAATAAATTTATCTATTTATTATTGCGCTTAATTGCAGTAGTAAAAATCACAAATATTTTTTATG  
 3 MT492037.1 AAATTATATAATAATCAAACATTTTTAATAATAATAATAAATTTATCTATTTATTATTGCGCTTAATTGCAGTAGTAAAAATCACAAATATTTTTTATG  
 4 MT492030.1 AAATTATATAATAATCAAACATTTTTAATAATAATAATAAATTTATCTATTTATTATTGCGCTTAATTGCAGTAGTAAAAATCACAAATATTTTTTATG  
 5 MT492031.1 AAATTATATAATAATCAAACATTTTTAATAATAATAATAAATTTATCTATTTATTATTGCGCTTAATTGCAGTAGTAAAAATCACAAATATTTTTTATG  
 6 MT492032.1 AAATTATATAATAATCAAACATTTTTAATAATAATAATAAATTTATCTATTTATTATTGCGCTTAATTGCAGTAGTAAAAATCACAAATATTTTTTATG  
 7 MT492033.1 AAATTATATAATAATCAAACATTTTTAATAATAATAATAAATTTATCTATTTATTATTGCGCTTAATTGCAGTAGTAAAAATCACAAATATTTTTTATG  
 8 MT492034.1 AAATTATATAATAATCAAACATTTTTAATAATAATAATAAATTTATCTATTTATTATTGCGCTTAATTGCAGTAGTAAAAATCACAAATATTTTTTATG  
 9 MT492035.1 AAATTATATAATAATCAAACATTTTTAATAATAATAATAAATTTATCTATTTATTATTGCGCTTAATTGCAGTAGTAAAAATCACAAATATTTTTTATG

CYTB ->

10701

8 10800

G P L R S S F N \* M N I Y K P I R K T H P I F K I I N G S L I D L  
 1 MN793322.1 GTCCTTTACGATCTTCATTTAAC TAATGATAAACATTTATAAGCCAATTCGAAAAACCCATCCTATTTTCAAATCATTAAATGGATCATTAAATGGATTTA  
 2 MT492036.1 GTCCTTTACGATCTTCATTTAAC TAATGATAAACATTTATAAGCCAATTCGAAAAACCCATCCTATTTTCAAATCATTAAATGGATCATTAAATGGATTTA  
 3 MT492037.1 GTCCTTTACGATCTTCATTTAAC TAATGATAAACATTTATAAGCCAATTCGAAAAACCCATCCTATTTTCAAATCATTAAATGGATCATTAAATGGATTTA  
 4 MT492030.1 GTCCTTTACGATCTTCATTTAAC TAATGATAAACATTTATAAGCCAATTCGAAAAACCCATCCTATTTTCAAATCATTAAATGGATCATTAAATGGATTTA  
 5 MT492031.1 GTCCTTTACGATCTTCATTTAAC TAATGATAAACATTTATAAGCCAATTCGAAAAACCCATCCTATTTTCAAATCATTAAATGGATCATTAAATGGATTTA  
 6 MT492032.1 GTCCTTTACGATCTTCATTTAAC TAATGATAAACATTTATAAGCCAATTCGAAAAACCCATCCTATTTTCAAATCATTAAATGGATCATTAAATGGATTTA  
 7 MT492033.1 GTCCTTTACGATCTTCATTTAAC TAATGATAAACATTTATAAGCCAATTCGAAAAACCCATCCTATTTTCAAATCATTAAATGGATCATTAAATGGATTTA  
 8 MT492034.1 GTCCTTTACGATCTTCATTTAAC TAATGATAAACATTTATAAGCCAATTCGAAAAACCCATCCTATTTTCAAATCATTAAATGGATCATTAAATGGATTTA  
 9 MT492035.1 GTCCTTTACGATCTTCATTTAAC TAATGATAAACATTTATAAGCCAATTCGAAAAACCCATCCTATTTTCAAATCATTAAATGGATCATTAAATGGATTTA

10801

9 10900

P T P S N I S S L W N F G S L L A M C L I I Q I I T G L F L T M Y

1 MN793322.1 CCAACTCCATCAAATATTTCTCCCTATGAAATTTGGATCCTTATTAGCTATATGTTAATTATTCAAATATTACTGGACTATTTTTAACAAATATATT  
2 MT492036.1 CCAACTCCCTCAAATATTTCTCCCTATGAAATTTGGATCCTTATTAGCTATATGTTAATTATTCAAATATTACTGGACTATTTTTAACAAATATATT  
3 MT492037.1 CCAACTCCATCAAATATTTCTCCCTATGAAATTTGGATCCTTATTAGCTATATGTTAATTATTCAAATATTACTGGACTATTTTTAACAAATATATT  
4 MT492030.1 CCAACTCCCTCAAATATTTCTCCCTATGAAATTTGGATCCTTATTAGCTATATGTTAATTATTCAAATATTACTGGACTATTTTTAACAAATATATT  
5 MT492031.1 CCAACTCCCTCAAATATTTCTCCCTATGAAATTTGGATCCTTATTAGCTATATGTTAATTATTCAAATATTACTGGACTATTTTTAACAAATATATT  
6 MT492032.1 CC<sup>G</sup>ACTCCCTCAAATATTTCTCCCTATGAAATTTGGATCCTTATTAGCTATATGTTAATTATTCAAATATTACTGGACTATTTTTAAC<sup>C</sup>ATATATT  
7 MT492033.1 CCAACTCCATCAAATATTTCTCCCTATGAAATTTGGATCCTTATTAGCTATATGTTAATTATTCAAATATTACTGGACTATTTTTAACAAATATATT  
8 MT492034.1 CCAACTCCATCAAATATTTCTCCCTATGAAATTTGGATCCTTATTAGCTATATGTTAATTATTCAAATATTACTGGACTATTTTTAACAAATATATT  
9 MT492035.1 CCAACTCCATCAAATATTTCTCCCTATGAAATTTGGATCCTTATTAGCTATATGTTAATTATTCAAATATTACTGGACTATTTTTAAC<sup>C</sup>ATATATT

10901

0 11000

Y T A N I E L A F Y S V N Y I C R N V N Y G W L I R T L H A N G A S

1 MN793322.1 ATACAGCTAATATTGAATTAGCTTTTTATAGAGTTAACTATATTTGTCGAAATGTA<sup>A</sup>AATTATGGTTGATTAATTCGAACTCTTCATGCAAATGGAGCTTC  
2 MT492036.1 ATACAGCTAATATTGAATTAGCTTTTTATAGAGTTAACTATATTTGTCGAAATGTA<sup>A</sup>AATTATGGTTGATTAATTCGAACTCTTCATGCAAATGGAGCTTC  
3 MT492037.1 ATACAGCTAATATTGAATTAGCTTTTTATAGAGTTAACTATATTTGTCGAAATGTA<sup>A</sup>AATTATGGTTGATTAATTCGAACTCTTCATGCAAATGGAGCTTC  
4 MT492030.1 ATACAGCTAATATTGAATTAGCTTTTTATAGAGTTAACTATATTTGTCGAAATGTA<sup>A</sup>AATTATGGTTGATTAATTCGAACTCTTCATGCAAATGGAGCTTC  
5 MT492031.1 ATACAGCTAATATTGAATTAGCTTTTTATAGAGTTAACTATATTTGTCGAAATGTA<sup>A</sup>AATTATGGTTGATTAATTCGAACTCTTCATGCAAATGGAGCTTC  
6 MT492032.1 ATACAGCTAATATTGAATTAGCTTTTTATAGAGTTAACTATATTTGTCGAAATGTA<sup>A</sup>AATTATGGTTGATTAATTCGAACTCTTCATGCAAATGGAGCTTC  
7 MT492033.1 ATACAGCTAATATTGAATTAGCTTTTTATAGAGTTAACTATATTTGTCGAAATGTA<sup>A</sup>AATTATGGTTGATTAATTCGAACTCTTCATGCAAATGGAGCTTC  
8 MT492034.1 ATACAGCTAATATTGAATTAGCTTTTTATAGAGTTAACTATATTTGTCGAAATGTA<sup>A</sup>AATTATGGTTGATTAATTCGAACTCTTCATGCAAATGGAGCTTC  
9 MT492035.1 ATACAGCTAATATTGAATTAGCTTTTTATAGAGTTAACTATATTTGTCGAAATGTA<sup>A</sup>AATTATGGTTGATTAATTCGAACTCTTCATGCAAATGGAGCTTC

11001

1 11100

F F F I C I Y I H I G R G I Y Y E S F N L K Y T W M V G V I I L F

1 MN793322.1 ATTTTTTTTTATTTGTATTTATATTCACATTGGACGAGGAATTTATATGAATCATTTAATTTAAAATATACATGAATAGTTGGAGTAATTATTTTATTC  
2 MT492036.1 ATTTTTTTTTATTTGTATTTATATTCACATTGGACGAGGAATTTATATGAATCATTTAATTTAAAATATACATGAATAGTTGGAGTAATTATTTTATTC  
3 MT492037.1 ATTTTTTTTTATTTGTATTTATATTCACATTGGACGAGGAATTTATATGAATCATTTAATTTAAAATATACATGAATAGTTGGAGTAATTATTTTATTC  
4 MT492030.1 ATTTTTTTTTATTTGTATTTATATTCACATTGGACGAGGAATTTATATGAATCATTTAATTTAAAATATACATGAATAGTTGGAGTAATTATTTTATTC  
5 MT492031.1 ATTTTTTTTTATTTGTATTTATATTCACATTGGACGAGGAATTTATATGAATCATTTAATTTAAAATATACATGAATAGTTGGAGTAATTATTTTATTC  
6 MT492032.1 ATTTTTTTTTATTTGTATTTATATTCACATTGGACGAGGAATTTATATGAATCATTTAATTTAAAATATACATGAATAGTTGGAGTAATTATTTTATTC  
7 MT492033.1 ATTTTTTTTTATTTGTATTTATATTCACATTGGACGAGGAATTTATATGAATCATTTAATTTAAAATATACATGAATAGTTGGAGTAATTATTTTATTC  
8 MT492034.1 ATTTTTTTTTATTTGTATTTATATTCACATTGGACGAGGAATTTATATGAATCATTTAATTTAAAATATACATGAATAGTTGGAGTAATTATTTTATTC  
9 MT492035.1 ATTTTTTTTTATTTGTATTTATATTCACATTGGACGAGGAATTTATATGAATCATTTAATTTAAAATATACATGAATAGTTGGAGTAATTATTTTATTC

11101

2 11200

L L M A T A F M G Y V L P W G Q M S F W G A T V I T N L L S A I P

1 MN793322.1 TTATTAATAGCAACAGCTTTTATAGGATATGTATTACCTTGAGGACAAATATCATTTTGAGGAGCAACAGTTATTACAAATCTACTATCAGCAATTCCCTT  
2 MT492036.1 TTATTAATAGCAACAGCTTTTATAGGATATGTATTACCTTGAGGACAAATATCATTTTGAGGAGCAACAGTTATTACAAATCTACTATCAGCAATTCCCTT  
3 MT492037.1 TTATTAATAGCAACAGCTTTTATAGGATATGTATTACCTTGAGGACAAATATCATTTTGAGGAGCAACAGTTATTACAAATCTACTATCAGCAATTCCCTT  
4 MT492030.1 TTATTAATAGCAACAGCTTTTATAGGATATGTATTACCTTGAGGACAAATATCATTTTGAGGAGCAACAGTTATTACAAATCTACTATCAGCAATTCCCTT  
5 MT492031.1 TTATTAATAGCAACAGCTTTTATAGGATATGTATTACCTTGAGGACAAATATCATTTTGAGGAGCAACAGTTATTACAAATCTACTATCAGCAATTCCCTT  
6 MT492032.1 TTATTAATAGCAACAGCTTTTATAGGATATGTATTACCTTGAGGACAAATATCATTTTGAGGAGCAACAGTTATTACAAATCTACTATCAGCAATTCCCTT  
7 MT492033.1 TTATTAATAGCAACAGCTTTTATAGGATATGTATTACCTTGAGGACAAATATCATTTTGAGGAGCAACAGTTATTACAAATCTACTATCAGCAATTCCCTT  
8 MT492034.1 TTATTAATAGCAACAGCTTTTATAGGATATGTATTACCTTGAGGACAAATATCATTTTGAGGAGCAACAGTTATTACAAATCTACTATCAGCAATTCCCTT  
9 MT492035.1 TTATTAATAGCAACAGCTTTTATAGGATATGTATTACCTTGAGGACAAATATCATTTTGAGGAGCAACAGTTATTACAAATCTACTATCAGCAATTCCCTT

11201

3 11300

Y L G T M L V N W I W G G F A I D N A T L T R F Y T F H F I L P F I  
 1 MN793322.1 ATTTAGGAACATATATTAGTAAATTGAATTTGAGGAGGATTTGCCATTGATAATGCAACATTAACCTCGATTTTATACATTTTCATTTTATTCTACCATTTAT  
 2 MT492036.1 ATTTAGGAACATATATTAGTAAATTGAATTTGAGGAGGATTTGCCATTGATAATGCAACATTAACCTCGATTTTATACATTTTCATTTTATTCTACCATTTAT  
 3 MT492037.1 ATTTAGGAACATATATTAGTAAATTGAATTTGAGGAGGATTTGCCATTGATAATGCAACATTAACCTCGATTTTATACATTTTCATTTTATTCTACCATTTAT  
 4 MT492030.1 ATTTAGGAACATATATTAGTAAATTGAATTTGAGGAGGATTTGCCATTGATAATGCAACATTAACCTCGATTTTATACATTTTCATTTTATTCTACCATTTAT  
 5 MT492031.1 ATTTAGGAACATATATTAGTAAATTGAATTTGAGGAGGATTTGCCATTGATAATGCAACATTAACCTCGATTTTATACATTTTCATTTTATTCTACCATTTAT  
 6 MT492032.1 ATTTAGGAACATATATTAGTAAATTGAATTTGAGGAGGATTTGCCATTGATAATGCAACATTAACCTCGATTTTATACATTTTCATTTTATTCTACCATTTAT  
 7 MT492033.1 ATTTAGGAACATATATTAGTAAATTGAATTTGAGGAGGATTTGCCATTGATAATGCAACATTAACCTCGATTTTATACATTTTCATTTTATTCTACCATTTAT  
 8 MT492034.1 ATTTAGGAACATATATTAGTAAATTGAATTTGAGGAGGATTTGCCATTGATAATGCAACATTAACCTCGATTTTATACATTTTCATTTTATTCTACCATTTAT  
 9 MT492035.1 ATTTAGGAACATATATTAGTAAATTGAATTTGAGGAGGATTTGCCATTGATAATGCAACATTAACCTCGATTTTATACATTTTCATTTTATTCTACCATTTAT

11301

4 11400

I L M M T M I H L L F L H Q T G S N N P L G I N S N L D K I P F H  
 1 MN793322.1 TATTTTAATAATAACAATAAATTCATCTATTATTTTACATCAAACAGGATCTAATAACCCCTTAGGAATTAATAGAAACTTAGATAAAAATTCATTTTCAC  
 2 MT492036.1 TATTTTAATAATAACAATAAATTCATCTATTATTTTACATCAAACAGGATCTAATAACCCCTTAGGAATTAATAGAAACTTAGATAAAAATTCATTTTCAC  
 3 MT492037.1 TATTTTAATAATAACAATAAATTCATCTATTATTTTACATCAAACAGGATCTAATAACCCCTTAGGAATTAATAGAAACTTAGATAAAAATTCATTTTCAC  
 4 MT492030.1 TATTTTAATAATAACAATAAATTCATCTATTATTTTACATCAAACAGGATCTAATAACCCCTTAGGAATTAATAGAAACTTAGATAAAAATTCATTTTCAC  
 5 MT492031.1 TATTTTAATAATAACAATAAATTCATCTATTATTTTACATCAAACAGGATCTAATAACCCCTTAGGAATTAATAGAAACTTAGATAAAAATTCATTTTCAC  
 6 MT492032.1 TATTTTAATAATAACAATAAATTCATCTATTATTTTACATCAAACAGGATCTAATAACCCCTTAGGAATTAATAGAAACTTAGATAAAAATTCATTTTCAC  
 7 MT492033.1 TATTTTAATAATAACAATAAATTCATCTATTATTTTACATCAAACAGGATCTAATAACCCCTTAGGAATTAATAGAAACTTAGATAAAAATTCATTTTCAC  
 8 MT492034.1 TATTTTAATAATAACAATAAATTCATCTATTATTTTACATCAAACAGGATCTAATAACCCCTTAGGAATTAATAGAAACTTAGATAAAAATTCATTTTCAC  
 9 MT492035.1 TATTTTAATAATAACAATAAATTCATCTATTATTTTACATCAAACAGGATCTAATAACCCCTTAGGAATTAATAGAAACTTAGATAAAAATTCATTTTCAC

11401

5 11500

P F F T F K D M I G F I I I S F L L I F L T L T N P Y L L G D P D  
 1 MN793322.1 CCATTTTTTACATTTAAAGATATAAATGGATTTATTATTATTTTCATTTTTATTAATTTTTTAAACATTAACCAATCCTTATTTATTAGGAGACCCCTGATA  
 2 MT492036.1 CCATTTTTTACATTTAAAGATATAAATGGATTTATTATTATTTTCATTTTTATTAATTTTTTAAACATTAACCAATCCTTATTTATTAGGAGACCCCTGATA  
 3 MT492037.1 CCATTTTTTACATTTAAAGATATAAATGGATTTATTATTATTTTCATTTTTATTAATTTTTTAAACATTAACCAATCCTTATTTATTAGGAGACCCCTGATA  
 4 MT492030.1 CCATTTTTTACATTTAAAGATATAAATGGATTTATTATTATTTTCATTTTTATTAATTTTTTAAACATTAACCAATCCTTATTTATTAGGAGACCCCTGATA  
 5 MT492031.1 CCATTTTTTACATTTAAAGATATAAATGGATTTATTATTATTTTCATTTTTATTAATTTTTTAAACATTAACCAATCCTTATTTATTAGGAGACCCCTGATA  
 6 MT492032.1 CCATTTTTTACATTTAAAGATATAAATGGATTTATTATTATTTTCATTTTTATTAATTTTTTAAACATTAACCAATCCTTATTTATTAGGAGACCCCTGATA  
 7 MT492033.1 CCATTTTTTACATTTAAAGATATAAATGGATTTATTATTATTTTCATTTTTATTAATTTTTTAAACATTAACCAATCCTTATTTATTAGGAGACCCCTGATA  
 8 MT492034.1 CCATTTTTTACATTTAAAGATATAAATGGATTTATTATTATTTTCATTTTTATTAATTTTTTAAACATTAACCAATCCTTATTTATTAGGAGACCCCTGATA  
 9 MT492035.1 CCATTTTTTACATTTAAAGATATAAATGGATTTATTATTATTTTCATTTTTATTAATTTTTTAAACATTAACCAATCCTTATTTATTAGGAGACCCCTGATA

11501

6 11600

N F T P A N P L V T P I H I Q P E W Y F L F A Y A I L R S I P N K L  
 1 MN793322.1 ATTTTACACCAGCTAATCCATTAGTAAACCAATTCATATTTCAACCTGAATGATATTTCTTATTTGCTTATGCAATTTTACGATCAATTTCCAAATAAAT  
 2 MT492036.1 ATTTTACACCAGCTAATCCATTAGTAAACCAATTCATATTTCAACCTGAATGATATTTCTTATTTGCTTATGCAATTTTACGATCAATTTCCAAATAAAT  
 3 MT492037.1 ATTTTACACCAGCTAATCCATTAGTAAACCAATTCATATTTCAACCTGAATGATATTTCTTATTTGCTTATGCAATTTTACGATCAATTTCCAAATAAAT  
 4 MT492030.1 ATTTTACACCAGCTAATCCATTAGTAAACCAATTCATATTTCAACCTGAATGATATTTCTTATTTGCTTATGCAATTTTACGATCAATTTCCAAATAAAT  
 5 MT492031.1 ATTTTACACCAGCTAATCCATTAGTAAACCAATTCATATTTCAACCTGAATGATATTTCTTATTTGCTTATGCAATTTTACGATCAATTTCCAAATAAAT  
 6 MT492032.1 ATTTTACACCAGCTAATCCATTAGTAAACCAATTCATATTTCAACCTGAATGATATTTCTTATTTGCTTATGCAATTTTACGATCAATTTCCAAATAAAT  
 7 MT492033.1 ATTTTACACCAGCTAATCCATTAGTAAACCAATTCATATTTCAACCTGAATGATATTTCTTATTTGCTTATGCAATTTTACGATCAATTTCCAAATAAAT  
 8 MT492034.1 ATTTTACACCAGCTAATCCATTAGTAAACCAATTCATATTTCAACCTGAATGATATTTCTTATTTGCTTATGCAATTTTACGATCAATTTCCAAATAAAT  
 9 MT492035.1 ATTTTACACCAGCTAATCCATTAGTAAACCAATTCATATTTCAACCTGAATGATATTTCTTATTTGCTTATGCAATTTTACGATCAATTTCCAAATAAAT



11601

7 11700

G G V I A L I M S I L I L I I L P L T F F K K I Q G I Q F Y P M N  
 1 MN793322.1 AGGAGGTGTTATTGCACCTTATTATATCAATTTTAATTTTAAATTATTTTACCATTAACATTCCTTTAAAAAATTC AAGGAATTC AATTTTATCCAATAAAC  
 2 MT492036.1 AGGAGGTGTTATTGCACCTTATTATATCAATTTTAATTTTAAATTATTTTACCATTAACATTCCTTTAAAAAATTC AAGGAATTC AATTTTATCCAATAAAC  
 3 MT492037.1 AGGAGGTGTTATTGCACCTTATTATATCAATTTTAATTTTAAATTATTTTACCATTAACATTCCTTTAAAAAATTC AAGGAATTC AATTTTATCCAATAAAC  
 4 MT492030.1 AGGAGGTGTTATTGCACCTTATTATATCAATTTTAATTTTAAATTATTTTACCATTAACATTCCTTTAAAAAATTC AAGGAATTC AATTTTATCCAATAAAC  
 5 MT492031.1 AGGAGGTGTTATTGCACCTTATTATATCAATTTTAATTTTAAATTATTTTACCATTAACATTCCTTTAAAAAATTC AAGGAATTC AATTTTATCCAATAAAC  
 6 MT492032.1 AGGAGGGGTTATTGCACCTTATTATATCAATTTTAATTTTAAATTATTTTACCATTAACATTCCTTTAAAAAATTC AAGGAATTC AATTTTATCCAATAAAC  
 7 MT492033.1 AGGAGGGGTTATTGCACCTTATTATATCAATTTTAATTTTAAATTATTTTACCATTAACATTCCTTTAAAAAATTC AAGGAATTC AATTTTATCCAATAAAC  
 8 MT492034.1 AGGAGGTGTTATTGCACCTTATTATATCAATTTTAATTTTAAATTATTTTACCATTAACATTCCTTTAAAAAATTC AAGGAATTC AATTTTATCCAATAAAC  
 9 MT492035.1 AGGAGGGGTTATTGCACCTTATTATATCAATTTTAATTTTAAATTATTTTACCATTAACATTCCTTTAAAAAATTC AAGGAATTC AATTTTATCCAATAAAC

11701

8 11800

Q I L F W I M V V T I I L L T W I G A R P V E D P Y V F V G Q V L  
 1 MN793322.1 CAAATCTTATTTTGAATTATAGTAGTTACAATTATTTTACTAACATGAATTGGAGCAGCACCAGTAGAAGATCCTTATGTATTTGTGGGACAAGTATTAA  
 2 MT492036.1 CAAATCTTATTTTGAATTATAGTAGTTACAATTATTTTACTAACATGAATTGGAGCAGCACCAGTAGAAGATCCTTATGTATTTGTGGGACAAGTATTAA  
 3 MT492037.1 CAAATCTTATTTTGAATTATAGTAGTTACAATTATTTTACTAACATGAATTGGAGCAGCACCAGTAGAAGATCCTTATGTATTTGTGGGACAAGTATTAA  
 4 MT492030.1 CAAATCTTATTTTGAATTATAGTAGTTACAATTATTTTACTAACATGAATTGGAGCAGCACCAGTAGAAGATCCTTATGTATTTGTGGGACAAGTATTAA  
 5 MT492031.1 CAAATCTTATTTTGAATTATAGTAGTTACAATTATTTTACTAACATGAATTGGAGCAGCACCAGTAGAAGATCCTTATGTATTTGTGGGACAAGTATTAA  
 6 MT492032.1 CAAATCTTATTTTGAATTATAGTAGTTACAATTATTTTACTAACATGAATTGGAGCAGCACCAGTAGAAGATCCTTATGTATTTGTGGGACAAGTATTAA  
 7 MT492033.1 CAAATCTTATTTTGAATTATAGTAGTTACAATTATTTTACTAACATGAATTGGAGCAGCACCAGTAGAAGATCCTTATGTATTTGTGGGACAAGTATTAA  
 8 MT492034.1 CAAATCTTATTTTGAATTATAGTAGTTACAATTATTTTACTAACATGAATTGGAGCAGCACCAGTAGAAGATCCTTATGTATTTGTGGGACAAGTATTAA  
 9 MT492035.1 CAAATCTTATTTTGAATTATAGTAGTTACAATTATTTTACTAACATGAATTGGAGCAGCACCAGTAGAAGATCCTTATGTATTTGTGGGACAAGTATTAA

| tRNA-Ser (UGA) ->

11801

9 11900

T I M Y F S Y Y I I N P M I S I Y W D K L I F N \*aattaatgagccttgccaataagcatt  
 1 MN793322.1 CAATTATATATTTTTCATATTATATTATTAACCCCTATAATTAGAATTTATTGAGATAAAATTAATCCTTTAACFAAATTAATGAGCTTGTCAAATAAGCATT  
 2 MT492036.1 CAATTATATATTTTTCATATTATATTATTAACCCCTATAATTAGAATTTATTGAGATAAAATTAATCCTTTAACFAAATTAATGAGCTTGTCAAATAAGCATT  
 3 MT492037.1 CAATTATATATTTTTCATATTATATTATTAACCCCTATAATTAGAATTTATTGAGATAAAATTAATCCTTTAACFAAATTAATGAGCTTGTCAAATAAGCATT  
 4 MT492030.1 CAATTATATATTTTTCATATTATATTATTAACCCCTATAATTAGAATTTATTGAGATAAAATTAATCCTTTAACFAAATTAATGAGCTTGTCAAATAAGCATT  
 5 MT492031.1 CAATTATATATTTTTCATATTATATTATTAACCCCTATAATTAGAATTTATTGAGATAAAATTAATCCTTTAACFAAATTAATGAGCTTGTCAAATAAGCATT  
 6 MT492032.1 CAATTATATATTTTTCATATTATATTATTAACCCCTATAATTAGAATTTATTGAGATAAAATTAATCCTTTAACFAAATTAATGAGCTTGTCAAATAAGCATT  
 7 MT492033.1 CAATTATATATTTTTCATATTATATTATTAACCCCTATAATTAGAATTTATTGAGATAAAATTAATCCTTTAACFAAATTAATGAGCTTGTCAAATAAGCATT  
 8 MT492034.1 CAATTATATATTTTTCATATTATATTATTAACCCCTATAATTAGAATTTATTGAGATAAAATTAATCCTTTAACFAAATTAATGAGCTTGTCAAATAAGCATT  
 9 MT492035.1 CAATTATATATTTTTCATATTATATTATTAACCCCTATAATTAGAATTTATTGAGATAAAATTAATCCTTTAACFAAATTAATGAGCTTGTCAAATAAGCATT

11901

0 12000

tgttttgaaaacttaagaaagaataaataattctattaattt  
 1 MN793322.1 TGTTTTGAAAACCTTAAGAAAGAATAAATATTTCTATTAATTTTATACTAAAAATATTAACCTTACTTACTTAATTAATTTCTACTAAAAATAAATAAATTTTAA  
 2 MT492036.1 TGTTTTGAAAACCTTAAGAAAGAATAAATATTTCTATTAATTTTATACTAAAAATATTAACCTTACTTACTTAATTAATTTCTACTAAAAATAAATAAATTTTAA  
 3 MT492037.1 TGTTTTGAAAACCTTAAGAAAGAATAAATATTTCTATTAATTTTATACTAAAAATATTAACCTTACTTACTTAATTAATTTCTACTAAAAATAAATAAATTTTAA  
 4 MT492030.1 TGTTTTGAAAACCTTAAGAAAGAATAAATATTTCTATTAATTTTATACTAAAAATATTAACCTTACTTACTTAATTAATTTCTACTAAAAATAAATAAATTTTAA  
 5 MT492031.1 TGTTTTGAAAACCTTAAGAAAGAATAAATATTTCTATTAATTTTATACTAAAAATATTAACCTTACTTACTTAATTAATTTCTACTAAAAATAAATAAATTTTAA  
 6 MT492032.1 TGTTTTGAAAACCTTAAGAAAGAATAAATATTTCTATTAATTTTATACTAAAAATATTAACCTTACTTACTTAATTAATTTCTACTAAAAATAAATAAATTTTAA  
 7 MT492033.1 TGTTTTGAAAACCTTAAGAAAGAATAAATATTTCTATTAATTTTATACTAAAAATATTAACCTTACTTACTTAATTAATTTCTACTAAAAATAAATAAATTTTAA  
 8 MT492034.1 TGTTTTGAAAACCTTAAGAAAGAATAAATATTTCTATTAATTTTATACTAAAAATATTAACCTTACTTACTTAATTAATTTCTACTAAAAATAAATAAATTTTAA  
 9 MT492035.1 TGTTTTGAAAACCTTAAGAAAGAATAAATATTTCTATTAATTTTATACTAAAAATATTAACCTTACTTACTTAATTAATTTCTACTAAAAATAAATAAATTTTAA

\* F L L I K L  
GATTTTATTATTTTAAAAAT

12001 . . . . . : . . . . . 1 12100  
1 MN793322.1 CCCTAAATAAAATATTTAAAAAATTTAAAGAAATAGGTAAATAAAATTTTTCAGCTAAATATATTAATTTATCATAACGATACCGAGGTAATGTTCCACGA  
2 MT492036.1 CCCTAAATAAAATATTTAAAAAATTTAAAGAAATAGGTAAATAAAATTTTTCAGCTAAATATATTAATTTATCATAACGATACCGAGGTAATGTTCCACGA  
3 MT492037.1 CCCTAAATAAAATATTTAAAAAATTTAAAGAAATAGGTAAATAAAATTTTTCAGCTAAATATATTAATTTATCATAACGATACCGAGGTAATGTTCCACGA  
4 MT492030.1 CCCTAAATAAAATATTTAAAAAATTTAAAGAAATAGGTAAATAAAATTTTTCAGCTAAATATATTAATTTATCATAACGATACCGAGGTAATGTTCCACGA  
5 MT492031.1 CCCTAAATAAAATATTTAAAAAATTTAAAGAAATAGGTAAATAAAATTTTTCAGCTAAATATATTAATTTATCATAACGATACCGAGGTAATGTTCCACGA  
6 MT492032.1 CCCTAAATAAAATATTTAAAAAATTTAAAGAAATAGGTAAATAAAATTTTTCAGCTAAATATATTAATTTATCATAACGATACCGAGGTAATGTTCCACGA  
7 MT492033.1 CCCTAAATAAAATATTTAAAAAATTTAAAGAAATAGGTAAATAAAATTTTTCAGCTAAATATATTAATTTATCATAACGATACCGAGGTAATGTTCCACGA  
8 MT492034.1 CCCTAAATAAAATATTTAAAAAATTTAAAGAAATAGGTAAATAAAATTTTTCAGCTAAATATATTAATTTATCATAACGATACCGAGGTAATGTTCCACGA  
9 MT492035.1 CCCTAAATAAAATATTTAAAAAATTTAAAGAAATAGGTAAATAAAATTTTTCAGCTAAATATATTAATTTATCATAACGATACCGAGGTAATGTTCCACGA  
G L Y F M L F N L S I P L Y I K W A L Y M L K D Y R Y R P L T G R  
GGGATTTATTTTATAATTTTTTAAATTTCTTTATCCATTTATTTAAAAAGTTCGATTTATATAATTAATAGTATTGCTATGGCTCCATTACAAGTGTCT

12101 . . . . . : . . . . . 2 12200  
1 MN793322.1 ACTCAAATAAAATAAAAAAGAAATCAACGACAACCTTTAAATAAAAAAAAATCTTAAATGAATATCCCCCATATATAATAAAAACAAATAATAAACTTATAA  
2 MT492036.1 ACTCAAATAAAATAAAAAAGAAATCAACGACAACCTTTAAATAAAAAAAAATCTTAAATGAATATCCCCCATATATAATAAAAACAAATAATAAACTTATAA  
3 MT492037.1 ACTCAAATAAAATAAAAAAGAAATCAACGACAACCTTTAAATAAAAAAAAATCTTAAATGAATATCCCCCATATATAATAAAAACAAATAATAAACTTATAA  
4 MT492030.1 ACTCAAATAAAATAAAAAAGAAATCAACGACAACCTTTAAATAAAAAAAAATCTTAAATGAATATCCCCCATATATAATAAAAACAAATAATAAACTTATAA  
5 MT492031.1 ACTCAAATAAAATAAAAAAGAAATCAACGACAACCTTTAAATAAAAAAAAATCTTAAATGAATATCCCCCATATATAATAAAAACAAATAATAAACTTATAA  
6 MT492032.1 ACTCAAATAAAATAAAAAAGAAATCAACGACAACCTTTAAATAAAAAAAAATCTTAAATGAATATCCCCCATATATAATAAAAACAAATAATAAACTTATAA  
7 MT492033.1 ACTCAAATAAAATAAAAAAGAAATCAACGACAACCTTTAAATAAAAAAAAATCTTAAATGAATATCCCCCATATATAATAAAAACAAATAATAAACTTATAA  
8 MT492034.1 ACTCAAATAAAATAAAAAAGAAATCAACGACAACCTTTAAATAAAAAAAAATCTTAAATGAATATCCCCCATATATAATAAAAACAAATAATAAACTTATAA  
9 MT492035.1 ACTCAAATAAAATAAAAAAGAAATCAACGACAACCTTTAAATAAAAAAAAATCTTAAATGAATATCCCCCATATATAATAAAAACAAATAATAAACTTATAA  
V W I F L F S I L S L K L Y F F I S L S Y G G M Y L L V F L L S M F  
TGAGTTTATTTATTTTCTTTAGTTGCTGTGAAATTTATTTTTTTTTTAAAGAAATTAATTTATAGGGGGTATATATTATTTGTTTATTATTTGAATATT

12201 . . . . . : . . . . . 3 12300  
1 MN793322.1 ATAAAAATCTAGAATATTCAGCTAAAAAAATTAAGCAAACCCCCACTTCTATACTCAATATTAATCCAGAAACTAATCTCTCTCACCTTCAGCAAA  
2 MT492036.1 ATAAAAATCTAGAATATTCAGCTAAAAAAATTAAGCAAACCCCCACTTCTATACTCAATATTAATCCAGAAACTAATCTCTCTCACCTTCAGCAAA  
3 MT492037.1 ATAAAAATCTAGAATATTCAGCTAAAAAAATTAAGCAAACCCCCACTTCTATACTCAATATTAATCCAGAAACTAATCTCTCTCACCTTCAGCAAA  
4 MT492030.1 ATAAAAATCTAGAATATTCAGCTAAAAAAATTAAGCAAACCCCCACTTCTATACTCAATATTAATCCAGAAACTAATCTCTCTCACCTTCAGCAAA  
5 MT492031.1 ATAAAAATCTAGAATATTCAGCTAAAAAAATTAAGCAAACCCCCACTTCTATACTCAATATTAATCCAGAAACTAATCTCTCTCACCTTCAGCAAA  
6 MT492032.1 ATAAAAATCTAGAATATTCAGCTAAAAAAATTAAGCAAACCCCCACTTCTATACTCAATATTAATCCAGAAACTAATCTCTCTCACCTTCAGCAAA  
7 MT492033.1 ATAAAAATCTAGAATATTCAGCTAAAAAAATTAAGCAAACCCCCACTTCTATACTCAATATTAATCCAGAAACTAATCTCTCTCACCTTCAGCAAA  
8 MT492034.1 ATAAAAATCTAGAATATTCAGCTAAAAAAATTAAGCAAACCCCCACTTCTATACTCAATATTAATCCAGAAACTAATCTCTCTCACCTTCAGCAAA  
9 MT492035.1 ATAAAAATCTAGAATATTCAGCTAAAAAAATTAAGCAAACCCCCACTTCTATACTCAATATTAATCCAGAAACTAATCTCTCTCACCTTCAGCAAA  
L I S S Y E A L F I L A F G G S S Y E I N F G S V L E S E G E A F  
TATTTTAAAGATCTTATAAGTCGATTTTTTTTAAATTTCTGTTTGGGGGTGAAGATATGAGTTATAATTTAGGCTTTTGATTAAGAGAGAGTGAAGTCTGTTT

12301 . . . . . : . . . . . 4 12400  
1 MN793322.1 ATCAAATGGAGTTCGATTAGTTTCAGCTAATCTAGAAGAAAATCAACATAAACCCAAAGGAATTTAAAAAATAAAATCAAATTAATTTTGATAATAT  
2 MT492036.1 ATCAAATGGAGTTCGATTAGTTTCAGCTAATCTAGAAGAAAATCAACATAAACCCAAAGGAATTTAAAAAATAAAATCAAATTAATTTTGATAATAT  
3 MT492037.1 ATCAAATGGAGTTCGATTAGTTTCAGCTAATCTAGAAGAAAATCAACATAAACCCAAAGGAATTTAAAAAATAAAATCAAATTAATTTTGATAATAT  
4 MT492030.1 ATCAAATGGAGTTCGATTAGTTTCAGCTAATCTAGAAGAAAATCAACATAAACCCAAAGGAATTTAAAAAATAAAATCAAATTAATTTTGATAATAT  
5 MT492031.1 ATCAAATGGAGTTCGATTAGTTTCAGCTAATCTAGAAGAAAATCAACATAAACCCAAAGGAATTTAAAAAATAAAATCAAATTAATTTTGATAATAT  
6 MT492032.1 ATCAAATGGAGTTCGATTAGTTTCAGCTAATCTAGAAGAAAATCAACATAAACCCAAAGGAATTTAAAAAATAAAATCAAATTAATTTTGATAATAT  
7 MT492033.1 ATCAAATGGAGTTCGATTAGTTTCAGCTAATCTAGAAGAAAATCAACATAAACCCAAAGGAATTTAAAAAATAAAATCAAATTAATTTTGATAATAT  
8 MT492034.1 ATCAAATGGAGTTCGATTAGTTTCAGCTAATCTAGAAGAAAATCAACATAAACCCAAAGGAATTTAAAAAATAAAATCAAATTAATTTTGATAATAT  
9 MT492035.1 ATCAAATGGAGTTCGATTAGTTTCAGCTAATCTAGAAGAAAATCAACATAAACCCAAAGGAATTTAAAAAATAAAATCAAATTAATTTTGATAATAT

D F P T R N T E A L S S S F W C L G L P I M L F F F W I L N Q Y Y  
TAGTTTACCTCAAGCTAATCAAAGTCGATTAGATCTTCTTTTAGTTGTATTGGGTTTCCTTAATAAATTTTTTTTTTTAGTTAATTTAAACTATTATA

12401

5 12500

1 MN793322.1 ATAAAAATTACTAAATTTAAATCTATAACTATAATAAATCTTGATATTTAAAGCTAAACTAACCTCATATGAAATAGTTTGAGCTACTGCCCGTA  
2 MT492036.1 ATAAAAATTACTAAATTTAAATCTATAACTATAATAAATCTTGATATTTAAAGCTAAACTAACCTCATATGAAATAGTTTGAGCTACTGCCCGTA  
3 MT492037.1 ATAAAAATTACTAAATTTAAATCTATAACTATAATAAATCTTGATATTTAAAGCTAAACTAACCTCATATGAAATAGTTTGAGCTACTGCCCGTA  
4 MT492030.1 ATAAAAATTACTAAATTTAAATCTATAACTATAATAAATCTTGATATTTAAAGCTAAACTAACCTCATATGAAATAGTTTGAGCTACTGCCCGTA  
5 MT492031.1 ATAAAAATTACTAAATTTAAATCTATAACTATAATAAATCTTGATATTTAAAGCTAAACTAACCTCATATGAAATAGTTTGAGCTACTGCCCGTA  
6 MT492032.1 ATAAAAATTACTAAATTTAAATCTATAACTATAATAAATCTTGATATTTAAAGCTAAACTAACCTCATATGAAATAGTTTGAGCTACTGCCCGTA  
7 MT492033.1 ATAAAAATTACTAAATTTAAATCTATAACTATAATAAATCTTGATATTTAAAGCTAAACTAACCTCATATGAAATAGTTTGAGCTACTGCCCGTA  
8 MT492034.1 ATAAAAATTACTAAATTTAAATCTATAACTATAATAAATCTTGATATTTAAAGCTAAACTAACCTCATATGAAATAGTTTGAGCTACTGCCCGTA  
9 MT492035.1 ATAAAAATTACTAAATTTAAATCTATAACTATAATAAATCTTGATATTTAAAGCTAAACTAACCTCATATGAAATAGTTTGAGCTACTGCCCGTA  
M F I V L N F D M V M I I S S M L I L A L S V E Y S I T Q A V A R L  
TATTTTTAATGATTTAATTTTAGATATTGATATTATTAAGAACATAAATTTAATTTTCGATTTGATTGGAGTATACATTTATCAAACCTCGATGACGGGCAT

12501

6 12600

1 MN793322.1 AACCCCTAATAAAGCATAATTAGAATTAGATGACCAACCAGAAACTATTTAAAGTATAAAGCTCCTAAACTAGTACAACATAAAAAAAAAATAAATACCTAA  
2 MT492036.1 AACCCCTAATAAAGCATAATTAGAATTAGATGACCAACCAGAAACTATTTAAAGTATAAAGCTCCTAAACTAGTACAACATAAAAAAAAAATAAATACCTAA  
3 MT492037.1 AACCCCTAATAAAGCATAATTAGAATTAGATGACCAACCAGAAACTATTTAAAGTATAAAGCTCCTAAACTAGTACAACATAAAAAAAAAATAAATACCTAA  
4 MT492030.1 AACCCCTAATAAAGCATAATTAGAATTAGATGACCAACCAGAAACTATTTAAAGTATAAAGCTCCTAAACTAGTACAACATAAAAAAAAAATAAATACCTAA  
5 MT492031.1 AACCCCTAATAAAGCATAATTAGAATTAGATGACCAACCAGAAACTATTTAAAGTATAAAGCTCCTAAACTAGTACAACATAAAAAAAAAATAAATACCTAA  
6 MT492032.1 AACCCCTAATAAAGCATAATTAGAATTAGATGACCAACCAGAAACTATTTAAAGTATAAAGCTCCTAAACTAGTACAACATAAAAAAAAAATAAATACCTAA  
7 MT492033.1 AACCCCTAATAAAGCATAATTAGAATTAGATGACCAACCAGAAACTATTTAAAGTATAAAGCTCCTAAACTAGTACAACATAAAAAAAAAATAAATACCTAA  
8 MT492034.1 AACCCCTAATAAAGCATAATTAGAATTAGATGACCAACCAGAAACTATTTAAAGTATAAAGCTCCTAAACTAGTACAACATAAAAAAAAAATAAATACCTAA  
9 MT492035.1 AACCCCTAATAAAGCATAATTAGAATTAGATGACCAACCAGAAACTATTTAAAGTATAAAGCTCCTAAACTAGTACAACATAAAAAAAAAATAAATACCTAA  
G G L L A Y N S N S S W G S V M L T Y V G L S T C C L F F L I G L  
TTGGGGGATTATTTTCGTATTAATCTTAATCTACTGGTTGGTCTTTGATAATTTTCATATTTGAGGATTTGATCATGTTGTATTTTTTTTATTTTATTTGATT

12601

7 12700

1 MN793322.1 ATTTAAATTTACTAAATTTAAATAATATGGAATTATAAAGCTCAAATTTAAAGATAAAAATAAATCTAATAACAGGAGAAAAATAAAGATAAATAATTT  
2 MT492036.1 ATTTAAATTTACTAAATTTAAATAATATGGAATTATAAAGCTCAAATTTAAAGATAAAAATAAATCTAATAACAGGAGAAAAATAAAGATAAATAATTT  
3 MT492037.1 ATTTAAATTTACTAAATTTAAATAATATGGAATTATAAAGCTCAAATTTAAAGATAAAAATAAATCTAATAACAGGAGAAAAATAAAGATAAATAATTT  
4 MT492030.1 ATTTAAATTTACTAAATTTAAATAATATGGAATTATAAAGCTCAAATTTAAAGATAAAAATAAATCTAATAACAGGAGAAAAATAAAGATAAATAATTT  
5 MT492031.1 ATTTAAATTTACTAAATTTAAATAATATGGAATTATAAAGCTCAAATTTAAAGATAAAAATAAATCTAATAACAGGAGAAAAATAAAGATAAATAATTT  
6 MT492032.1 ATTTAAATTTACTAAATTTAAATAATATGGAATTATAAAGCTCAAATTTAAAGATAAAAATAAATCTAATAACAGGAGAAAAATAAAGATAAATAATTT  
7 MT492033.1 ATTTAAATTTACTAAATTTAAATAATATGGAATTATAAAGCTCAAATTTAAAGATAAAAATAAATCTAATAACAGGAGAAAAATAAAGATAAATAATTT  
8 MT492034.1 ATTTAAATTTACTAAATTTAAATAATATGGAATTATAAAGCTCAAATTTAAAGATAAAAATAAATCTAATAACAGGAGAAAAATAAAGATAAATAATTT  
9 MT492035.1 ATTTAAATTTACTAAATTTAAATAATATGGAATTATAAAGCTCAAATTTAAAGATAAAAATAAATCTAATAACAGGAGAAAAATAAAGATAAATAATTT  
N F N V L N F Y Y P I M V W I M L S L I F S I V P S F Y Y S L Y N  
TAATTTTAAATGATTTAATTTTATTATACCTTAATATTGAGTTTAAATTTCTATTTTATTAGATTATTGTCCTCTTTTTATTATTCTATTTATTAA

12701

8 12800

1 MN793322.1 GAAAAATAAGGATAAGTCTGTTCCCTTAGTAATAATTTAATAGCATCTGAAAAAGGTTGTAATAATTCCTATAAACCCAACCTTTATTAGGACCTTTACGAA  
2 MT492036.1 GAAAAATAAGGATAAGTCTGTTCCCTTAGTAATAATTTAATAGCATCTGAAAAAGGTTGTAATAATTCCTATAAACCCAACCTTTATTAGGACCTTTACGAA  
3 MT492037.1 GAAAAATAAGGATAAGTCTGTTCCCTTAGTAATAATTTAATAGCATCTGAAAAAGGTTGTAATAATTCCTATAAACCCAACCTTTATTAGGACCTTTACGAA  
4 MT492030.1 GAAAAATAAGGATAAGTCTGTTCCCTTAGTAATAATTTAATAGCATCTGAAAAAGGTTGTAATAATTCCTATAAACCCAACCTTTATTAGGACCTTTACGAA  
5 MT492031.1 GAAAAATAAGGATAAGTCTGTTCCCTTAGTAATAATTTAATAGCATCTGAAAAAGGTTGTAATAATTCCTATAAACCCAACCTTTATTAGGACCTTTACGAA  
6 MT492032.1 GAAAAATAAGGATAAGTCTGTTCCCTTAGTAATAATTTAATAGCATCTGAAAAAGGTTGTAATAATTCCTATAAACCCAACCTTTATTAGGACCTTTACGAA  
7 MT492033.1 GAAAAATAAGGATAAGTCTGTTCCCTTAGTAATAATTTAATAGCATCTGAAAAAGGTTGTAATAATTCCTATAAACCCAACCTTTATTAGGACCTTTACGAA  
8 MT492034.1 GAAAAATAAGGATAAGTCTGTTCCCTTAGTAATAATTTAATAGCATCTGAAAAAGGTTGTAATAATTCCTATAAACCCAACCTTTATTAGGACCTTTACGAA  
9 MT492035.1 GAAAAATAAGGATAAGTCTGTTCCCTTAGTAATAATTTAATAGCATCTGAAAAAGGTTGTAATAATTCCTATAAACCCAACCTTTATTAGGACCTTTACGAA  
S F L P Y T Q E K T F L K I A D S F P Q L I G M F G V K N P G K R I  
CTTTTATTTCCTATTACAGACAAGGAATCATTATTAAATTTATCGTAGACTTTTTCCAACATTTTAAAGGATATTGGGTTGAAATAATCCTGGAAATGCTT

12801 . . . . . : . . . . . 9 12900  
1 MN793322.1 TTTGAATATAACCTAAAACCTTCCGCTCTAATAAAGTTAAATATGCAACCCCAATTAAAAACCCAAGAATTAATAAATCCCAAAAAAATTAATAA  
2 MT492036.1 TTTGAATATAACCTAAAACCTTCCGCTCTAATAAAGTTAAATATGCAACCCCAATTAAAAACCCAAGAATTAATAAATCCCAAAAAAATTAATAA  
3 MT492037.1 TTTGAATATAACCTAAAACCTTCCGCTCTAATAAAGTTAAATATGCAACCCCAATTAAAAACCCAAGAATTAATAAATCCCAAAAAAATTAATAA  
4 MT492030.1 TTTGAATATAACCTAAAACCTTCCGCTCTAATAAAGTTAAATATGCAACCCCAATTAAAAACCCAAGAATTAATAAATCCCAAAAAAATTAATAA  
5 MT492031.1 TTTGAATATAACCTAAAACCTTCCGCTCTAATAAAGTTAAATATGCAACCCCAATTAAAAACCCAAGAATTAATAAATCCCAAAAAAATTAATAA  
6 MT492032.1 TTTGAATATAACCTAAAACCTTCCGCTCTAATAAAGTTAAATATGCAACCCCAATTAAAAACCCAAGAATTAATAAATCCCAAAAAAATTAATAA  
7 MT492033.1 TTTGAATATAACCTAAAACCTTCCGCTCTAATAAAGTTAAATATGCAACCCCAATTAAAAACCCAAGAATTAATAAATCCCAAAAAAATTAATAA  
8 MT492034.1 TTTGAATATAACCTAAAACCTTCCGCTCTAATAAAGTTAAATATGCAACCCCAATTAAAAACCCAAGAATTAATAAATCCCAAAAAAATTAATAA  
9 MT492035.1 TTTGAATATAACCTAAAACCTTCCGCTCTAATAAAGTTAAATATGCAACCCCAATTAAAAACCCAAGAATTAATAAATCCCAAAAAAATTAATAA  
Q I Y G L V K R E L L T L Y A V G I L V G L I L I I F G L F I L L  
AAACTTATATTGGATTTTGGGAAGCGAGATTATTCAATTTATACGTTGGGGTTAATTTTGTGGTCTTTAATTTTATTTTAGGGTTTTTTTAAATTATT

12901 . . . . . : . . . . . 0 13000  
1 MN793322.1 AAAATCAATATAAAAACATTTACTATCCATATAAATAAATTTATACATTTATGATTTCTAAAACTACTACACTTTTCTGCCAAAATAGTTTTTAAATTTAAA  
2 MT492036.1 AAAATCAATATAAAAACATTTACTATCCATATAAATAAATTTATACATTTATGATTTCTAAAACTACTACACTTTTCTGCCAAAATAGTTTTTAAATTTAAA  
3 MT492037.1 AAAATCAATATAAAAACATTTACTATCCATATAAATAAATTTATACATTTATGATTTCTAAAACTACTACACTTTTCTGCCAAAATAGTTTTTAAATTTAAA  
4 MT492030.1 AAAATCAATATAAAAACATTTACTATCCATATAAATAAATTTATACATTTATGATTTCTAAAACTACTACACTTTTCTGCCAAAATAGTTTTTAAATTTAAA  
5 MT492031.1 AAAATCAATATAAAAACATTTACTATCCATATAAATAAATTTATACATTTATGATTTCTAAAACTACTACACTTTTCTGCCAAAATAGTTTTTAAATTTAAA  
6 MT492032.1 AAAATCAATATAAAAACATTTACTATCCATATAAATAAATTTATACATTTATGATTTCTAAAACTACTACACTTTTCTGCCAAAATAGTTTTTAAATTTAAA  
7 MT492033.1 AAAATCAATATAAAAACATTTACTATCCATATAAATAAATTTATACATTTATGATTTCTAAAACTACTACACTTTTCTGCCAAAATAGTTTTTAAATTTAAA  
8 MT492034.1 AAAATCAATATAAAAACATTTACTATCCATATAAATAAATTTATACATTTATGATTTCTAAAACTACTACACTTTTCTGCCAAAATAGTTTTTAAATTTAAA  
9 MT492035.1 AAAATCAATATAAAAACATTTACTATCCATATAAATAAATTTATACATTTATGATTTCTAAAACTACTACACTTTTCTGCCAAAATAGTTTTTAAATTTAAA  
F D M atgataggtatatattttaatatgtaaaactaaagattttagtgatgtgaaaagacggttttatcaaaaatttaaat  
TTTTAGTTA | tRNA-Leu (UGA) -> |  
<- ND1 |

13001 . . . . . : . . . . . 1 13100  
1 MN793322.1 TTAAACATTAATAAAAATTCATTAATAAATTTAATTTAAATATTTATTCCTTTCGTTACTAAAATATTTTAAATATTTTAAAGATAGAAACCAACCTGGCTC  
2 MT492036.1 TTAAACATTAATAAAAATTCATTAATAAATTTAATTTAAATATTTATTCCTTTCGTTACTAAAATATTTTAAATATTTTAAAGATAGAAACCAACCTGGCTC  
3 MT492037.1 TTAAACATTAATAAAAATTCATTAATAAATTTAATTTAAATATTTATTCCTTTCGTTACTAAAATATTTTAAATATTTTAAAGATAGAAACCAACCTGGCTC  
4 MT492030.1 TTAAACATTAATAAAAATTCATTAATAAATTTAATTTAAATATTTATTCCTTTCGTTACTAAAATATTTTAAATATTTTAAAGATAGAAACCAACCTGGCTC  
5 MT492031.1 TTAAACATTAATAAAAATTCATTAATAAATTTAATTTAAATATTTATTCCTTTCGTTACTAAAATATTTTAAATATTTTAAAGATAGAAACCAACCTGGCTC  
6 MT492032.1 TTAAACATTAATAAAAATTCATTAATAAATTTAATTTAAATATTTATTCCTTTCGTTACTAAAATATTTTAAATATTTTAAAGATAGAAACCAACCTGGCTC  
7 MT492033.1 TTAAACATTAATAAAAATTCATTAATAAATTTAATTTAAATATTTATTCCTTTCGTTACTAAAATATTTTAAATATTTTAAAGATAGAAACCAACCTGGCTC  
8 MT492034.1 TTAAACATTAATAAAAATTCATTAATAAATTTAATTTAAATATTTATTCCTTTCGTTACTAAAATATTTTAAATATTTTAAAGATAGAAACCAACCTGGCTC  
9 MT492035.1 TTAAACATTAATAAAAATTCATTAATAAATTTAATTTAAATATTTATTCCTTTCGTTACTAAAATATTTTAAATATTTTAAAGATAGAAACCAACCTGGCTC  
aatttgaattattttaagtaatttttaaatataaattataaattttctatctttggttgaccag

13101 . . . . . : . . . . . 2 13200  
1 MN793322.1 ACACCGGTTTGAACCTCAGATCATGTAAGATTTTAAATGATCGAACAGATCAAAATTTTATACTTTTGCATATAAATTTTATCTTAATCCAACATCGAGGTC  
2 MT492036.1 ACACCGGTTTGAACCTCAGATCATGTAAGATTTTAAATGATCGAACAGATCAAAATTTTATACTTTTGCATATAAATTTTATCTTAATCCAACATCGAGGTC  
3 MT492037.1 ACACCGGTTTGAACCTCAGATCATGTAAGATTTTAAATGATCGAACAGATCAAAATTTTATACTTTTGCATATAAATTTTATCTTAATCCAACATCGAGGTC  
4 MT492030.1 ACACCGGTTTGAACCTCAGATCATGTAAGATTTTAAATGATCGAACAGATCAAAATTTTATACTTTTGCATATAAATTTTATCTTAATCCAACATCGAGGTC  
5 MT492031.1 ACACCGGTTTGAACCTCAGATCATGTAAGATTTTAAATGATCGAACAGATCAAAATTTTATACTTTTGCATATAAATTTTATCTTAATCCAACATCGAGGTC  
6 MT492032.1 ACACCGGTTTGAACCTCAGATCATGTAAGATTTTAAATGATCGAACAGATCAAAATTTTATACTTTTGCATATAAATTTTATCTTAATCCAACATCGAGGTC  
7 MT492033.1 ACACCGGTTTGAACCTCAGATCATGTAAGATTTTAAATGATCGAACAGATCAAAATTTTATACTTTTGCATATAAATTTTATCTTAATCCAACATCGAGGTC  
8 MT492034.1 ACACCGGTTTGAACCTCAGATCATGTAAGATTTTAAATGATCGAACAGATCAAAATTTTATACTTTTGCATATAAATTTTATCTTAATCCAACATCGAGGTC  
9 MT492035.1 ACACCGGTTTGAACCTCAGATCATGTAAGATTTTAAATGATCGAACAGATCAAAATTTTATACTTTTGCATATAAATTTTATCTTAATCCAACATCGAGGTC  
tgtggccaaacttgagtctagtacattctaaattactagcttgtctagttttaaataatgaaaacgtatatttaaatagaattaggtttagctccag

13201 . . . . . : . . . . . 3 13300  
1 MN793322.1 GCAAACCTCTTTTCTTATTTGAACTAAAAAATAATACGCTGTTATCCCTAAGGTAATTTTTCTTATAATCAAAAATTTGGATCAATTACTCACTT  
2 MT492036.1 GCAAACCTCTTTTCTTATTTGAACTAAAAAATAATACGCTGTTATCCCTAAGGTAATTTTTCTTATAATCAAAAATTTGGATCAATTACTCACTT  
3 MT492037.1 GCAAACCTCTTTTCTTATTTGAACTAAAAAATAATACGCTGTTATCCCTAAGGTAATTTTTCTTATAATCAAAAATTTGGATCAATTACTCACTT  
4 MT492030.1 GCAAACCTCTTTTCTTATTTGAACTAAAAAATAATACGCTGTTATCCCTAAGGTAATTTTTCTTATAATCAAAAATTTGGATCAATTACTCACTT  
5 MT492031.1 GCAAACCTCTTTTCTTATTTGAACTAAAAAATAATACGCTGTTATCCCTAAGGTAATTTTTCTTATAATCAAAAATTTGGATCAATTACTCACTT  
6 MT492032.1 GCAAACCTCTTTTCTTATTTGAACTAAAAAATAATACGCTGTTATCCCTAAGGTAATTTTTCTTATAATCAAAAATTTGGATCAATTACTCACTT  
7 MT492033.1 GCAAACCTCTTTTCTTATTTGAACTAAAAAATAATACGCTGTTATCCCTAAGGTAATTTTTCTTATAATCAAAAATTTGGATCAATTACTCACTT  
8 MT492034.1 GCAAACCTCTTTTCTTATTTGAACTAAAAAATAATACGCTGTTATCCCTAAGGTAATTTTTCTTATAATCAAAAATTTGGATCAATTACTCACTT  
9 MT492035.1 GCAAACCTCTTTTCTTATTTGAACTAAAAAATAATACGCTGTTATCCCTAAGGTAATTTTTCTTATAATCAAAAATTTGGATCAATTACTCACTT  
cgtttgagaaaaagaataaacttgatTTTTTTTTTaaatgagcaaatagggattccatataaaaaagaatattagtttttaaacctagttaatgagtgaa

13301 . . . . . : . . . . . 4 13400  
1 MN793322.1 ATCTATGAAATAATATATTTAAAAAAGTTAATTTTTATTTTTTATCACCCCAATAAAAATATTTAAATAAATTTAATTAATAATCTAAAAAATAATTTTA  
2 MT492036.1 ATCTATGAAATAATATATTTAAAAAAGTTAATTTTTATTTTTTATCACCCCAATAAAAATATTTAAATAAATTTAATTAATAATCTAAAAAATAATTTTA  
3 MT492037.1 ATCTATGAAATAATATATTTAAAAAAGTTAATTTTTATTTTTTATCACCCCAATAAAAATATTTAAATAAATTTAATTAATAATCTAAAAAATAATTTTA  
4 MT492030.1 ATCTATGAAATAATATATTTAAAAAAGTTAATTTTTATTTTTTATCACCCCAATAAAAATATTTAAATAAATTTAATTAATAATCTAAAAAATAATTTTA  
5 MT492031.1 ATCTATGAAATAATATATTTAAAAAAGTTAATTTTTATTTTTTATCACCCCAATAAAAATATTTAAATAAATTTAATTAATAATCTAAAAAATAATTTTA  
6 MT492032.1 ATCTATGAAATAATATATTTAAAAAAGTTAATTTTTATTTTTTATCACCCCAATAAAAATATTTAAATAAATTTAATTAATAATCTAAAAAATAATTTTA  
7 MT492033.1 ATCTATGAAATAATATATTTAAAAAAGTTAATTTTTATTTTTTATCACCCCAATAAAAATATTTAAATAAATTTAATTAATAATCTAAAAAATAATTTTA  
8 MT492034.1 ATCTATGAAATAATATATTTAAAAAAGTTAATTTTTATTTTTTATCACCCCAATAAAAATATTTAAATAAATTTAATTAATAATCTAAAAAATAATTTTA  
9 MT492035.1 ATCTATGAAATAATATATTTAAAAAAGTTAATTTTTATTTTTTATCACCCCAATAAAAATATTTAAATAAATTTAATTAATAATCTAAAAAATAATTTTA  
tagatacttttattatataatTTTTTTcaattaaaaataaaaaaatagtggggtatttttataataatTTTtaaatattatttagatTTTTttatttaaaat

13401 . . . . . : . . . . . 5 13500  
1 MN793322.1 TTATATATTAATATAAAAACCTATAGGGTCTTCTCGTCTTTTAAATAAAA TTTTGACTTTTAAATCAAAAATTAATTAATTAATAATAAATAAGAGAC  
2 MT492036.1 TTATATATTAATATAAAAACCTATAGGGTCTTCTCGTCTTTTAAATAAAA TTTTGACTTTTAAATCAAAAATTAATTAATTAATAATAAATAAGAGAC  
3 MT492037.1 TTATATATTAATATAAAAACCTATAGGGTCTTCTCGTCTTTTAAATAAAA TTTTGACTTTTAAATCAAAAATTAATTAATTAATAATAAATAAGAGAC  
4 MT492030.1 TTATATATTAATATAAAAACCTATAGGGTCTTCTCGTCTTTTAAATAAAA TTTTGACTTTTAAATCAAAAATTAATTAATTAATAATAAATAAGAGAC  
5 MT492031.1 TTATATATTAATATAAAAACCTATAGGGTCTTCTCGTCTTTTAAATAAAA TTTTGACTTTTAAATCAAAAATTAATTAATTAATAATAAATAAGAGAC  
6 MT492032.1 TTATATATTAATATAAAAACCTATAGGGTCTTCTCGTCTTTTAAATAAAA TTTTGACTTTTAAATCAAAAATTAATTAATTAATAATAAATAAGAGAC  
7 MT492033.1 TTATATATTAATATAAAAACCTAAGGGTCTTCTCGTCTTTTAAATAAAA TTTTGACTTTTAAATCAAAAATTAATTAATTAATAATAAATAAGAGAC  
8 MT492034.1 TTATATATTAATATAAAAACCTATAGGGTCTTCTCGTCTTTTAAATAAAA TTTTGACTTTTAAATCAAAAATTAATTAATTAATAATAAATAAGAGAC  
9 MT492035.1 TTATATATTAATATAAAAACCTATAGGGTCTTCTCGTCTTTTAAATAAAA TTTTGACTTTTAAATCAAAAATTAATTAATTAATAATAAATAAGAGAC  
aatatataattatattttgagatatcccagaagagcagaaaatTTTttttttaaactgaaaaattagtttttaatttaattaattattttattctctg

13501 . . . . . : . . . . . 6 13600  
1 MN793322.1 AGCTTATATTTTCATCCAATCTTTCATACAAGTCATCAATTAAAAACTATTTATTATGCTACCTTTGTACAGTCAATATACTGCAGCCCTTTAATAATTA  
2 MT492036.1 AGCTTATATTTTCATCCAATCTTTCATACAAGTCATCAATTAAAAACTATTTATTATGCTACCTTTGTACAGTCAATATACTGCAGCCCTTTAATAATTA  
3 MT492037.1 AGCTTATATTTTCATCCAATCTTTCATACAAGTCATCAATTAAAAACTATTTATTATGCTACCTTTGTACAGTCAATATACTGCAGCCCTTTAATAATTA  
4 MT492030.1 AGCTTATATTTTCATCCAATCTTTCATACAAGTCATCAATTAAAAACTATTTATTATGCTACCTTTGTACAGTCAATATACTGCAGCCCTTTAATAATTA  
5 MT492031.1 AGCTTATATTTTCATCCAATCTTTCATACAAGTCATCAATTAAAAACTATTTATTATGCTACCTTTGTACAGTCAATATACTGCAGCCCTTTAATAATTA  
6 MT492032.1 AGCTTATATTTTCATCCAATCTTTCATACAAGTCATCAATTAAAAACTATTTATTATGCTACCTTTGTACAGTCAATATACTGCAGCCCTTTAATAATTA  
7 MT492033.1 AGCTTATATTTTCATCCAATCTTTCATACAAGTCATCAATTAAAAACTATTTATTATGCTACCTTTGTACAGTCAATATACTGCAGCCCTTTAATAATTA  
8 MT492034.1 AGCTTATATTTTCATCCAATCTTTCATACAAGTCATCAATTAAAAACTATTTATTATGCTACCTTTGTACAGTCAATATACTGCAGCCCTTTAATAATTA  
9 MT492035.1 AGCTTATATTTTCATCCAATCTTTCATACAAGTCATCAATTAAAAACTATTTATTATGCTACCTTTGTACAGTCAATATACTGCAGCCCTTTAATAATTA  
tcgaatataaaagtaggttagaaagtatggttcagtagttaatTTTTTgataaataaacgatggaacatgtcagttatatgacgtcgggaaattattaat



14001 . . . : . . . 1 14100  
1 MN793322.1 AAAAAAAGTAGATATATTTTAAAACG-ATTAACATTTTCATTCTAATTAATTTTAAAATATTTATGAAACAATAACCTTAAATAATTAATTAACCTCTTT  
2 MT492036.1 AAAAAAAGTAGATATATTTTAAAACGGATTAACATTTTCATTCTAATTAATTTTAAAATATTTATGAAGCAATAACCTTAAATAATTAATTAACCTCTTT  
3 MT492037.1 AAAAAAAGTAGATATATTTTAAAACGGATTAACATTTTCATTCTAATTAATTTTAAAATATTTATGAAGCAATAACCTTAAATAATTAATTAACCTCTTT  
4 MT492030.1 AAAAAAAGTAGATATATTTTAAAACGGATTAACATTTTCATTCTAATTAATTTTAAAATATTTATGAAACAATAACCTTAAATAATTAATTAACCTCTTT  
5 MT492031.1 AAAAAAAGTAGATATATTTTAAAACG-ATTAACATTTTCATTCTAATTAATTTTAAAATATTTATGAAGCAATAACCTTAAATAATTAATTAACCTCTTT  
6 MT492032.1 AAAAAAAGTAGATATATTTTAAAACGGATTAACATTTTCATTCTAATTAATTTTAAAATATTTATGAAGCAATAACCTTAAATAATTAATTAACCTCTTT  
7 MT492033.1 AAAAAAAGTAGATATATTTTAAAACGGATTAACATTTTCATTCTAATTAATTTTAAAATATTTATGAAGCAATAACCTTAAATAATTAATTAACCTCTTT  
8 MT492034.1 AAAAAAAGTAGATATATTTTAAAACGGATTAACATTTTCATTCTAATTAATTTTAAAATATTTATGAAGCAATAACCTTAAATAATTAATTAACCTCTTT  
9 MT492035.1 AAAAAAAGTAGATATATTTTAAAACGGATTAACATTTTCATTCTAATTAATTTTAAAATATTTATGAAACAATAACCTTAAATAATTAATTAACCTCTTT  
ttttttgatctatataaaaattttgaccttaattgtaaaagtaaaagatttaataaaaattttataaaactttggtattggaattattaattaattgagaaa

14101 . . . : . . . 2 14200  
1 MN793322.1 AAAATTCGAGAATTTTTTATCTATAAAAAATTTAATTTAATAAACTCTGATACACAAGATACAATAAAATAATTTTACTTTAATAATAAATAAATTTCAATA  
2 MT492036.1 AAAATTCGAGAATTTTTTATCTATAAAAAATTTAATTTAATAAACTCTGATACACAAGATACAATAAAATAATTTTACTTTAATAATAAATAAATTTCAATA  
3 MT492037.1 AAAATTCGAGAATTTTTTCTATAAAAAATTTAATTTAATAAACTCTGATACACAAGATACAATAAAATAATTTTACTTTAATAATAAATAAATTTCAATA  
4 MT492030.1 AAAATTCGAGAATTTTTTATCTATAAAAAATTTAATTTAATAAACTCTGATACACAAGATACAATAAAATAATTTTACTTTAATAATAAATAAATTTCAATA  
5 MT492031.1 AAAATTCGAGAATTTTTTCTATAAAAAATTTAATTTAATAAACTCTGATACACAAGATACAATAAAATAATTTTACTTTAATAATAAATAAATTTCAATA  
6 MT492032.1 AAAATTCGAGAATTTTTTCTATAAAAAATTTAATTTAATAAACTCTGATACACAAGATACAATAAAATAATTTTACTTTAATAATAAATAAATTTCAATA  
7 MT492033.1 AAAATTCGAGAATTTTTTCTATAAAAAATTTAATTTAATAAACTCTGATACACAAGATACAATAAAATAATTTTACTTTAATAATAAATAAATTTCAATA  
8 MT492034.1 AAAATTCGAGAATTTTTTCTATAAAAAATTTAATTTAATAAACTCTGATACACAAGATACAATAAAATAATTTTACTTTAATAATAAATAAATTTCAATA  
9 MT492035.1 AAAATTCGAGAATTTTTTATCTATAAAAAATTTAATTTAATAAACTCTGATACACAAGATACAATAAAATAATTTTACTTTAATAATAAATAAATTTCAATA  
ttttaagctcttaaaaatagatatttttaaatataatttttgagactatgtggtctatgttattattataaatgaaattatatttatattaaagttat

14201 . . . : . . . 3 14300  
1 MN793322.1 TATTTTAAATTTCTTATACAATACTAATTAACCTATAAAAATTAATAATTTTCTTTATTAATACTAAAACCCCCCAATTTTAAATATAAAATTAATTTTA  
2 MT492036.1 TATTTTAAATTTCTTATCCAATACTAATTAACCTATAAAAATTAATAATTTTCTTTATTAATACTAAAACCCCCCAATTTTAAATATAAAATTAATTTTA  
3 MT492037.1 TATTTTAAATTTCTTATCCAATACTAATTAACCTATAAAAATTAATAATTTTCTTTATTAATACTAAAACCCCCCAATTTTAAATATAAAATTAATTTTA  
4 MT492030.1 TATTTTAAATTTCTTATCCAATACTAATTAACCTATAAAAATTAATAATTTTCTTTATTAATACTAAAACCCCCCAATTTTAAATATAAAATTAATTTTA  
5 MT492031.1 TATTTTAAATTTCTTATACAATACTAATTAACCTATAAAAATTAATAATTTTCTTTATTAATACTAAAACCCCCCAATTTTAAATATAAAATTAATTTTA  
6 MT492032.1 TATTTTAAATTTCTTATCCAATACTAATTAACCTATAAAAATTAATAATTTTCTTTATTAATACTAAAACCCCCCAATTTTAAATATAAAATTAATTTTA  
7 MT492033.1 TATTTTAAATTTCTTATACAATACTAATTAACCTATAAAAATTAATAATTTTCTTTATTAATACTAAAACCCCCCAATTTTAAATATAAAATTAATTTTA  
8 MT492034.1 TATTTTAAATTTCTTATACAATACTAATTAACCTATAAAAATTAATAATTTTCTTTATTAATACTAAAACCCCCCAATTTTAAATATAAAATTAATTTTA  
9 MT492035.1 TATTTTAAATTTCTTATACAATACTAATTAACCTATAAAAATTAATAATTTTCTTTATTAATACTAAAACCCCCCAATTTTAAATATAAAATTAATTTTA  
ataaaaatttaagaataggttatgatatttttaattattaaaaaagaaataattatgatattttggggggttaaaattataatttttaattaaaaat

14301 . . . : . . . 4 14400  
1 MN793322.1 TTATTTTAAATTTAATTTTACCCTCAAATTAATGAAAATTTCAATATCATTTCAATGTAATGAAATACCTTATCAAGCTCTAATTTGTTATTT  
2 MT492036.1 TTATTTTAAATTTAATTTTACCCTCAAATTAATGAAAATTTCAATATCATTTCAATGTAATGAAATACCTTATCAAGCTCTAATTTGTTATTT  
3 MT492037.1 TTATTTTAAATTTAATTTTACCCTCAAATTAATGAAAATTTCAATATCATTTCAATGTAATGAAATACCTTATCAAGCTCTAATTTGTTATTT  
4 MT492030.1 TTATTTTAAATTTAATTTTACCCTCAAATTAATGAAAATTTCAATATCATTTCAATGTAATGAAATACCTTATCAAGCTCTAATTTGTTATTT  
5 MT492031.1 TTATTTTAAATTTAATTTTACCCTCAAATTAATGAAAATTTCAATATCATTTCAATGTAATGAAATACCTTATCAAGCTCTAATTTGTTATTT  
6 MT492032.1 TTATTTTAAATTTAATTTTACCCTCAAATTAATGAAAATTTCAATATCATTTCAATGTAATGAAATACCTTATCAAGCTCTAATTTGTTATTT  
7 MT492033.1 TTATTTTAAATTTAATTTTACCCTCAAATTAATGAAAATTTCAATATCATTTCAATGTAATGAAATACCTTATCAAGCTCTAATTTGTTATTT  
8 MT492034.1 TTATTTTAAATTTAATTTTACCCTCAAATTAATGAAAATTTCAATATCATTTCAATGTAATGAAATACCTTATCAAGCTCTAATTTGTTATTT  
9 MT492035.1 TTATTTTAAATTTAATTTTACCCTCAAATTAATGAAAATTTCAATATCATTTCAATGTAATGAAATACCTTATCAAGCTCTAATTTGTTATTT  
aataaaaaatttaataataaaaatttttaacttttaaggttatgtaaaagttacatttactttatgaaatggttcgagattaaacaataaaa

14401 . . . . . : . . . . . 5 14500  
1 MN793322.1 CTAGAAACACTTTCCAGTACCTCTACTTTGTTACGACTTATTCCAATTTATTTATGAAAGCGACGGGCAATATGTACATATTTAATATATAATCATTTT  
2 MT492036.1 CTAGAAACACTTTCCAGTACCTCTACTTTGTTACGACTTATTCCAATTTATTTATGAAAGCGACGGGCAATATGTACATATTTAATATATAATCATTTT  
3 MT492037.1 CTAGAAACACTTTCCAGTACCTCTACTTTGTTACGACTTATTCCAATTTATTTATGAAAGCGACGGGCAATATGTACATATTTAATATATAATCATTTT  
4 MT492030.1 CTAGAAACACTTTCCAGTACCTCTACTTTGTTACGACTTATTCCAATTTATTTATGAAAGCGACGGGCAATATGTACATATTTAATATATAATCATTTT  
5 MT492031.1 CTAGAAACACTTTCCAGTACCTCTACTTTGTTACGACTTATTCCAATTTATTTATGAAAGCGACGGGCAATATGTACATATTTAATATATAATCATTTT  
6 MT492032.1 CTAGAAACACTTTCCAGTACCTCTACTTTGTTACGACTTATTCCAATTTATTTATGAAAGCGACGGGCAATATGTACATATTTAATATATAATCATTTT  
7 MT492033.1 CTAGAAACACTTTCCAGTACCTCTACTTTGTTACGACTTATTCCAATTTATTTATGAAAGCGACGGGCAATATGTACATATTTAATATATAATCATTTT  
8 MT492034.1 CTAGAAACACTTTCCAGTACCTCTACTTTGTTACGACTTATTCCAATTTATTTATGAAAGCGACGGGCAATATGTACATATTTAATATATAATCATTTT  
9 MT492035.1 CTAGAAACACTTTCCAGTACCTCTACTTTGTTACGACTTATTCCAATTTATTTATGAAAGCGACGGGCAATATGTACATATTTAATATATAATCATTTT  
gatcctttgtgaaaggtcatggagatgaaacaatgctgaataaggttaaaataaatacctcttcgctgcccgttatacatgtataaaaattatataattagtaaaa

14501 . . . . . : . . . . . 6 14600  
1 MN793322.1 ATTAAATAAATAAAAATTACATTTAAATCCACTTTCAAATTTTATTACAAAAAATCCATTTAAATAAATTTATTGTAATCCATTATATTCTTAAT  
2 MT492036.1 ATTAAATAAATAAAAATTACATTTAAATCCACTTTCAAATTTTATTACAAAAAATCCATTTAAATAAATTTATTGTAATCCATTATATTCTTAAT  
3 MT492037.1 ATTAAATAAATAAAAATTACATTTAAATCCACTTTCAAATTTTATTACAAAAAATCCATTTAAATAAATTTATTGTAATCCATTATATTCTTAAT  
4 MT492030.1 ATTAAATAAATAAAAATTACATTTAAATCCACTTTCAAATTTTATTACAAAAAATCCATTTAAATAAATTTATTGTAATCCATTATATTCTTAAT  
5 MT492031.1 ATTAAATAAATAAAAATTACATTTAAATCCACTTTCAAATTTTATTACAAAAAATCCATTTAAATAAATTTATTGTAATCCATTATATTCTTAAT  
6 MT492032.1 ATTAAATAAATAAAAATTACATTTAAATCCACTTTCAAATTTTATTACAAAAAATCCATTTAAATAAATTTATTGTAATCCATTATATTCTTAAT  
7 MT492033.1 ATTAAATAAATAAAAATTACATTTAAATCCACTTTCAAATTTTATTACAAAAAATCCATTTAAATAAATTTATTGTAATCCATTATATTCTTAAT  
8 MT492034.1 ATTAAATAAATAAAAATTACATTTAAATCCACTTTCAAATTTTATTACAAAAAATCCATTTAAATAAATTTATTGTAATCCATTATATTCTTAAT  
9 MT492035.1 ATTAAATAAATAAAAATTACATTTAAATCCACTTTCAAATTTTATTACAAAAAATCCATTTAAATAAATTTATTGTAATCCATTATATTCTTAAT  
Taattttatttttaattgtaaatttaggtgtttgtgtaaaaaaatggtttttttt-aggtaaatatttttaataacattaggtaatataagaatta

14601 . . . . . : . . . . . 7 14700  
1 MN793322.1 TATAATCTGCATCTTGATCTGATTTAATTTTAAATATAAAAATAAAATATATTTTTCATTTAAAAATATTTTTTAAACAACGATATACAAAATTTTAAA  
2 MT492036.1 TATAATCTGCATCTTGATCTGATTTAATTTTAAATATAAAAATAAAATATATTTTTCATTTAAAAATATTTTTTAAACAACGATATACAAAATTTTAAA  
3 MT492037.1 TATAATCTGCATCTTGATCTGATTTAATTTTAAATATAAAAATAAAATATATTTTTCATTTAAAAATATTTTTTAAACAACGATATACAAAATTTTAAA  
4 MT492030.1 TATAATCTGCATCTTGATCTGATTTAATTTTAAATATAAAAATAAAATATATTTTTCATTTAAAAATATTTTTTAAACAACGATATACAAAATTTTAAA  
5 MT492031.1 TATAATCTGCATCTTGATCTGATTTAATTTTAAATATAAAAATAAAATATATTTTTCATTTAAAAATATTTTTTAAACAACGATATACAAAATTTTAAA  
6 MT492032.1 TATAATCTGCATCTTGATCTGATTTAATTTTAAATATAAAAATAAAATATATTTTTCATTTAAAAATATTTTTTAAACAACGATATACAAAATTTTAAA  
7 MT492033.1 TATAATCTGCATCTTGATCTGATTTAATTTTAAATATAAAAATAAAATATATTTTTCATTTAAAAATATTTTTTAAACAACGATATACAAAATTTTAAA  
8 MT492034.1 TATAATCTGCATCTTGATCTGATTTAATTTTAAATATAAAAATAAAATATATTTTTCATTTAAAAATATTTTTTAAACAACGATATACAAAATTTTAAA  
9 MT492035.1 TATAATCTGCATCTTGATCTGATTTAATTTTAAATATAAAAATAAAATATATTTTTCATTTAAAAATATTTTTTAAACAACGATATACAAAATTTTAAA  
Atattagacgtagaactagactaaattaaaaattaatttttaattttataataaaagtaatttttataaaaaaattggtgctatagtttttaaaatt

14701 . . . . . : . . . . . 8 14800  
1 MN793322.1 TTAAGTAAATTCATTCGTGGATTATCAATTAATAAACAGATTCCTCTAAATGAACTAAAATACCGCCAAATTTATTTAAGTTTCAATAAAATAATTATATAC  
2 MT492036.1 TTAAGTAAATTCATTCGTGGATTATCAATTAATAAACAGATTCCTCTAAATGAACTAAAATACCGCCAAATTTATTTAAGTTTCAATAAAATAATTATATAC  
3 MT492037.1 TTAAGTAAATTCATTCGTGGATTATCAATTAATAAACAGATTCCTCTAAATGAACTAAAATACCGCCAAATTTATTTAAGTTTCAATAAAATAATTATATAC  
4 MT492030.1 TTAAGTAAATTCATTCGTGGATTATCAATTAATAAACAGATTCCTCTAAATGAACTAAAATACCGCCAAATTTATTTAAGTTTCAATAAAATAATTATATAC  
5 MT492031.1 TTAAGTAAATTCATTCGTGGATTATCAATTAATAAACAGATTCCTCTAAATGAACTAAAATACCGCCAAATTTATTTAAGTTTCAATAAAATAATTATATAC  
6 MT492032.1 TTAAGTAAATTCATTCGTGGATTATCAATTAATAAACAGATTCCTCTAAATGAACTAAAATACCGCCAAATTTATTTAAGTTTCAATAAAATAATTATATAC  
7 MT492033.1 TTAAGTAAATTCATTCGTGGATTATCAATTAATAAACAGATTCCTCTAAATGAACTAAAATACCGCCAAATTTATTTAAGTTTCAATAAAATAATTATATAC  
8 MT492034.1 TTAAGTAAATTCATTCGTGGATTATCAATTAATAAACAGATTCCTCTAAATGAACTAAAATACCGCCAAATTTATTTAAGTTTCAATAAAATAATTATATAC  
9 MT492035.1 TTAAGTAAATTCATTCGTGGATTATCAATTAATAAACAGATTCCTCTAAATGAACTAAAATACCGCCAAATTTATTTAAGTTTCAATAAAATAATTATATAC  
aattcatttaagtaagcacctaagtagttaatttattgtcctaaggagatttacttgattttatggcgggttaataaattcaagttattttatataatag



```
14801 . . . . . : . . . . . 9 14900
1 MN793322.1 TATTTTAGTATTTTAAATTTAAATTTTAAATAATAGGGTATCTAATCCTAGTTTATAATATAAAATTTATTAATTTATAAAATTAATTAATTAATTAATTA
2 MT492036.1 TATTTTAGTATTTTAAATTTAAATTTTAAATAATAGGGTATCTAATCCTAGTTTATAATATAAAATTTATTAATTTATAAAATTAATTAATTAATTAATTA
3 MT492037.1 TATTTTAGTATTTTAAATTTAAATTTTAAATAATAGGGTATCTAATCCTAGTTTATAATATAAAATTTATTAATTTATAAAATTAATTAATTAATTAATTA
4 MT492030.1 TATTTTAGTATTTTAAATTTAATTATAAACTAGGATTAGATACCCTATTTATTAATAATTTAAATTTAAATACTAAAAATAGTATATAATTTATTTAAGTT
5 MT492031.1 TATTTTAGTATTTTAAATTTAAATTTTAA-----
6 MT492032.1 TATTTTAGTATTTTAAATTTAAATTTTAA-----
7 MT492033.1 TATTTTAGTATTTTAAATTTAAATTTTAA-----
8 MT492034.1 TATTTTAGTATTTTAAATTTAAATTTTAA-----
9 MT492035.1 TATTTTAGTATTTTAAATTTAAATTTTAAATAATAGGGTATCTAATCCTAGTTTATAATATAAAATTTATTAATTTATAAAATTAATTAATTAATTAATTA
ataaaatcataaaatttaaatttaaaaat
      <- rRNA-SSU |
```

```
14901 . . . . . : . . . . . 0 15000
1 MN793322.1 ATAAAAATTCACCTATTAATTTAATATTTAATTAATAAAATTTTATAAATTAATTACTAATAAAATTTAATTTAATTTTGTATAACCGCAACTGCT
2 MT492036.1 ATAAAAATTCACCTATTAATTTAATATTTAATTAATAAAATTTTATAAATTAATTACTAATAAAATTTAATTTAATTTTGTATAACCGCAACTGCT
3 MT492037.1 ATAAAAATTCACCTATTAATTTAATATTTAATTAATAAAATTTTATAAATTAATTACTAATAAAATTTAATTTAATTTTGTATAACCGCAACTGCT
4 MT492030.1 TCAATAAATAATTATATACTATTTTAGTATTTTAAATTTAAA-----
5 MT492031.1 -----
6 MT492032.1 -----
7 MT492033.1 -----
8 MT492034.1 -----
9 MT492035.1 ATAAAAATTCACCTATTAATTTAATATTTAATTAATAAAATTTTATAAATTAATTACTAATAAAATTTAATTTAATTTTGTATAACCGCAACTGCT
```

```
15001 . . . . . : . . . . . 1 15100
1 MN793322.1 GGCACAAAATTTGTTATTAATTTAAATATTACTAAATCTTAATTTCTTAAATTTTAAATATTAATTGCTATATATTTTAAATTCAAAAATTTATTAAT
2 MT492036.1 GGC-----
3 MT492037.1 GGCACAAAATTTGTTATTAATTTAAATATTACTAAATCTTAATTTCTTAAATTTTAAATATTAATTGCTATATATTTTAAATTCAAAAATTTATTAAT
4 MT492030.1 -----
5 MT492031.1 -----
6 MT492032.1 -----
7 MT492033.1 -----
8 MT492034.1 -----
9 MT492035.1 GGCACAAAATTTGTTATTAATTTAAATATTACTAAATCTTAATTTCTTAAATTTTAAATATTAATTGCTATATATTTTAAATTCAAAAATTTATTAAT
```

```
15101 . . . . . : . . . . . 2 15200
1 MN793322.1 AATGAAAAATTAACACTAAAATTTATATGCAAAAATAAATTTATAATAAAATTTATAAACTATAAAAAATTTATTTAATACTTAAAATTTTAACTTAGATT
2 MT492036.1 -----
3 MT492037.1 AATGAAAAATTAACACTAAAATTTATATGCAAAAATAAATTTATAATAAAATTTATAAA-----
4 MT492030.1 -----
5 MT492031.1 -----
6 MT492032.1 -----
7 MT492033.1 -----
8 MT492034.1 -----
9 MT492035.1 AATGAAAAATTAACACTAAAATTTATATGCAAAAATAAATTTATAATAAAATTTATAAACTATAAAAAATTTATTTAATACTTAAAATTTTAACTTAGATT
```

15201 . . . . . : . . . . . 3 15300  
1 MN793322.1 TTTTTTTTTTTTTTTT-ATATTAAATATTTAATATAAAATTATAAATTTTAAATATTTATTTCTTTTCTTTTTCATAATATTAATATTAATAAATAATA  
2 MT492036.1 -----  
3 MT492037.1 -----  
4 MT492030.1 -----  
5 MT492031.1 -----  
6 MT492032.1 -----  
7 MT492033.1 -----  
8 MT492034.1 -----  
9 MT492035.1 TTTTTTTTTTTTTTTTATATTAATATTTAATATAAAATTATAAATTTTAAAT-----

15301 . . . . . : . . . . . 4 15400  
1 MN793322.1 TCATTATACAGCGATTATAATCATTGAAATAAATAATTAATTATTAAGTTAATAAATTAATTAATTTGATTTATTAATATATTATAAATATAAATTTCTA  
2 MT492036.1 -----  
3 MT492037.1 -----  
4 MT492030.1 -----  
5 MT492031.1 -----  
6 MT492032.1 -----  
7 MT492033.1 -----  
8 MT492034.1 -----  
9 MT492035.1 -----

15401 . . . . . : . . . . . 5 15500  
1 MN793322.1 TTATATATATATATATATATTAATATAAATAATTAATTAATATTTAATATATATATATATATATATAAACCATTCCCTAATTTTTTTCTTTTAAT  
2 MT492036.1 -----  
3 MT492037.1 -----  
4 MT492030.1 -----  
5 MT492031.1 -----  
6 MT492032.1 -----  
7 MT492033.1 -----  
8 MT492034.1 -----  
9 MT492035.1 -----

15501 ] 15506  
1 MN793322.1 AATAAA  
2 MT492036.1 -----  
3 MT492037.1 -----  
4 MT492030.1 -----  
5 MT492031.1 -----  
6 MT492032.1 -----  
7 MT492033.1 -----  
8 MT492034.1 -----  
9 MT492035.1 -----

**Figure S4:** Mean and distribution of normalized read depths (reads per kilo base per million mapped reads; RPKM) estimated among contigs of putative mitochondrial origins obtained from *de novo* libraries from mitochondrion-enriched and unenriched samples. Enriched samples had significantly higher read depth than unenriched samples ( $t = 14.435$ ;  $df = 1, 667$ ;  $p < 2.2 \times 10^{-16}$ ).

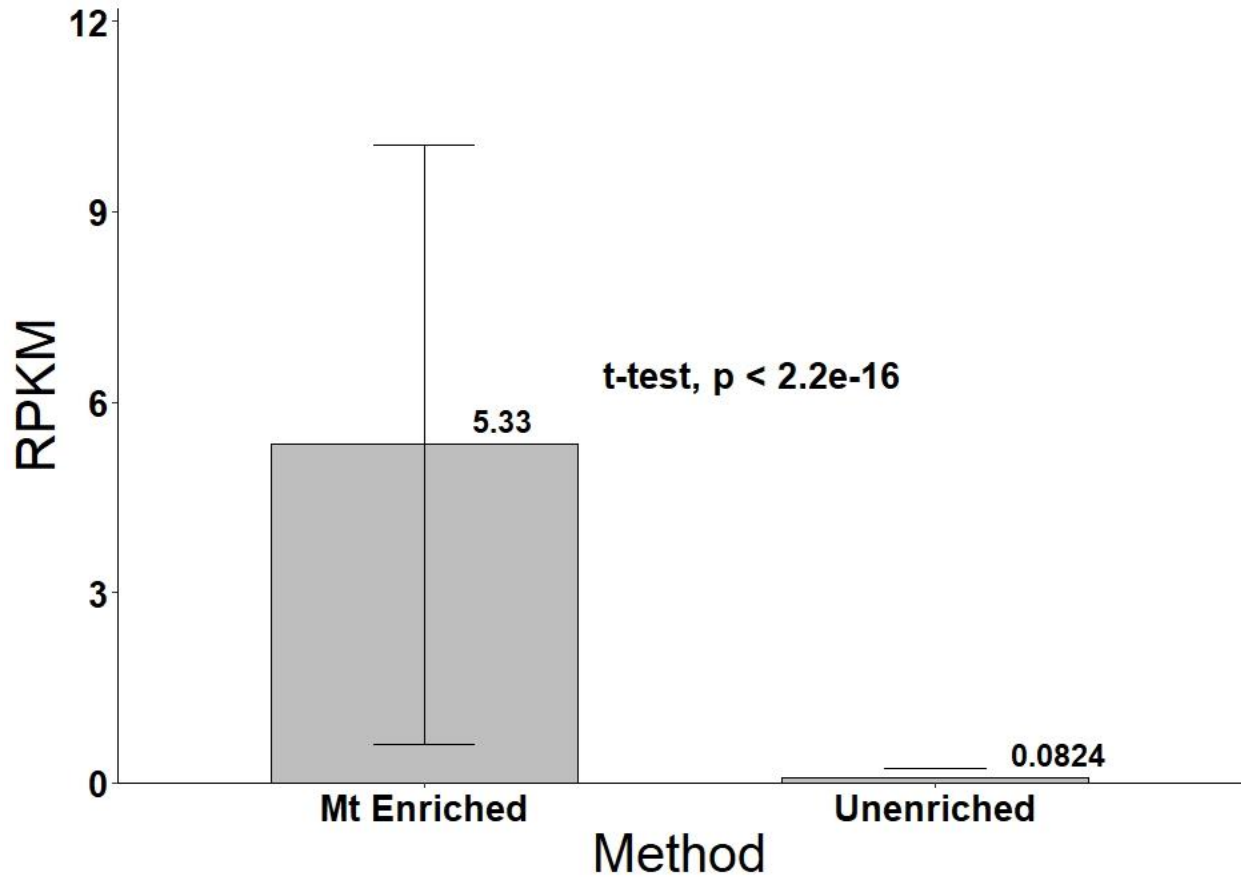

**Figure S5:** Normalized read depths (reads per kilo base per million mapped reads; RPKM) among *de novo* assembled contigs from libraries constructed from enriched (circles) and unenriched (triangles) extraction methods. Contigs corresponding to those of mitochondrial genome origin (red) are as defined by homology to the *Ostrinia nubilalis* reference AF4429573.1. Contigs of unknown origin are also shown (grey). Contigs within the unenriched libraries with lengths > 16,000 bp and RPKM > 16 are not shown.

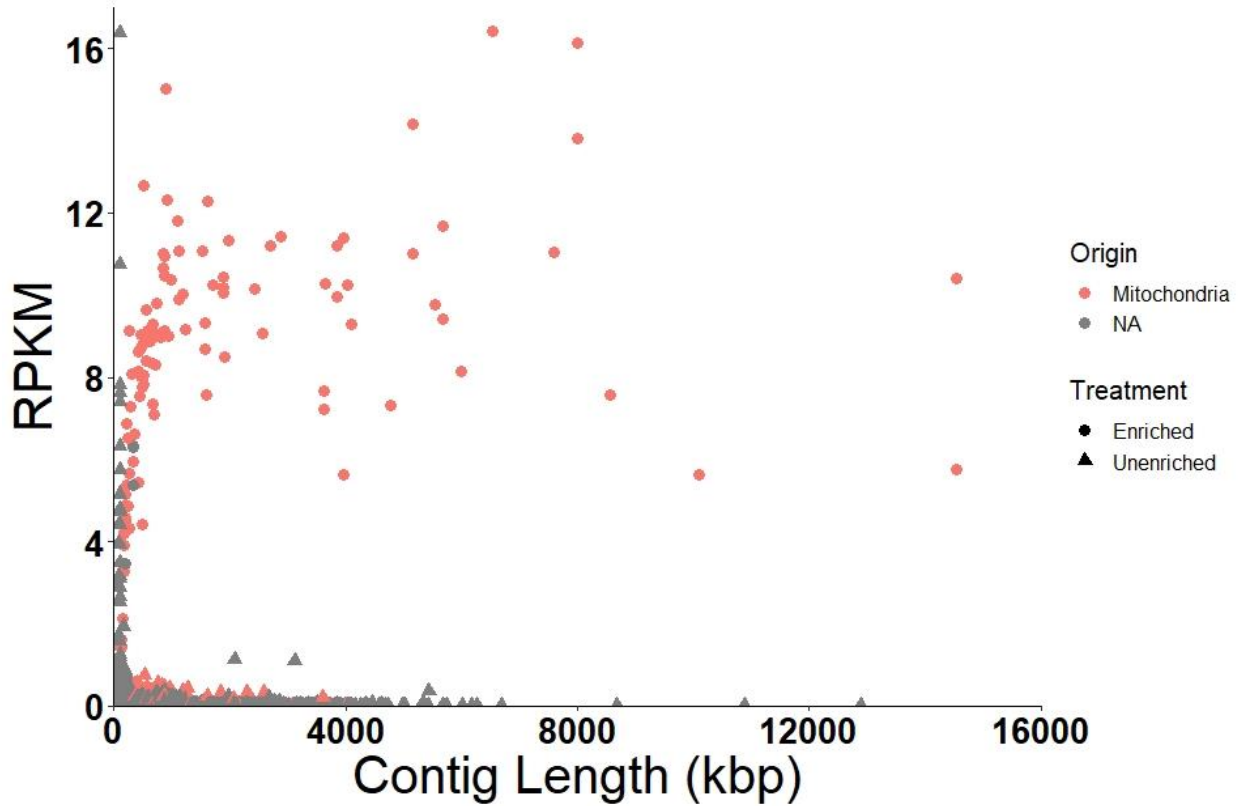

**Table S1.** Quantification of mitochondrion enrichment at optimized parameters by comparing real-time quantitative PCR (qPCR) C<sub>T</sub> Values obtained with *apn1* nuclear primers and *coxI* mitochondrial primers against nuclear fraction, mitochondrial fraction, and unenriched control templates. Additional quantification of mitochondrion enrichment at optimized parameters was estimates with high-throughput read alignment rates to a mitochondrial reference genome (AF442957.1) of enriched and unenriched samples (accessions MT492030.1-MT492037.1; SRX2498822-SRX2498825). Fold enrichment was calculated for each enriched sample with both quantification methods.

| Treatment      | Sample  | Real-time qPCR C <sub>T</sub> Values |             |             |             |                        |             |             |             | Fold Enrichment | Read Alignment |                       |                |                 |
|----------------|---------|--------------------------------------|-------------|-------------|-------------|------------------------|-------------|-------------|-------------|-----------------|----------------|-----------------------|----------------|-----------------|
|                |         | Nuclear Fraction                     |             |             |             | Mitochondrial Fraction |             |             |             |                 | Total Reads    | Aligned to AF442957.1 | Alignment Rate | Fold Enrichment |
|                |         | <i>apn1</i>                          | <i>apn1</i> | <i>coxI</i> | <i>coxI</i> | <i>apn1</i>            | <i>apn1</i> | <i>coxI</i> | <i>coxI</i> |                 |                |                       |                |                 |
| Centrifugation | ID_02   | 25.37                                | 24.35       | 18.77       | 18.16       | 29.81                  | 29.25       | 14.52       | 14.69       | 59.30           | 2,784,696      | 632,453               | 23.7%          | 42.8            |
| Centrifugation | ID_03   | 24.54                                | 25.70       | 17.31       | 17.20       | 29.18                  | 29.35       | 14.34       | 13.81       | 71.26           | 3,542,792      | 1,033,136             | 30.5%          | 55.0            |
| Centrifugation | ID_04   | 24.33                                | 24.41       | 17.83       | 17.41       | 30.51                  | 28.69       | 14.68       | 14.91       | 54.57           | 3,556,284      | 918,312               | 27.1%          | 48.7            |
| Centrifugation | ID_06   | 25.54                                | 27.34       | No Ct       | 17.36       | 30.44                  | 31.05       | 15.14       | 14.86       | 104.69          | 2,542,850      | 806,607               | 33.0%          | 59.8            |
| Centrifugation | ID_07   | 23.71                                | 23.00       | 16.55       | 16.76       | 31.35                  | 29.97       | 15.13       | 15.22       | 87.43           | 3,571,772      | 1,092,603             | 32.0%          | 57.7            |
| Centrifugation | ID_11   | 24.72                                | 24.05       | 17.97       | 17.84       | 30.68                  | 30.08       | 15.16       | 14.74       | 84.16           | 3,021,608      | 632,342               | 21.9%          | 39.5            |
| Centrifugation | ID_12   | 23.14                                | 23.30       | 17.32       | 16.03       | 30.98                  | 30.86       | 15.11       | 15.00       | 113.77          | 2,446,844      | 673,965               | 28.7%          | 52.0            |
| Centrifugation | ID_18   | 24.90                                | No Ct       | 17.64       | 17.26       | 30.18                  | 31.58       | 15.09       | 14.94       | 113.77          | 2,909,350      | 460,181               | 16.5%          | 29.8            |
| Control        | SDSS ♀1 | 26.68                                | 27.09       | 18.32       | 18.15       |                        |             |             |             |                 |                |                       |                |                 |
| Control        | SDSS ♀2 | 26.08                                | 26.45       | 16.63       | 17.06       |                        |             |             |             |                 |                |                       |                |                 |
| Control        | LVE     |                                      |             |             |             |                        |             |             |             |                 | 32,150,000     | 184,088               | 0.6%           |                 |
| Control        | LVZ     |                                      |             |             |             |                        |             |             |             |                 | 24,708,000     | 169,132               | 0.7%           |                 |
| Control        | RSE     |                                      |             |             |             |                        |             |             |             |                 | 47,636,000     | 274,872               | 0.6%           |                 |
| Control        | RSZ     |                                      |             |             |             |                        |             |             |             |                 | 36,782,000     | 105,302               | 0.3%           |                 |

**Table S2.** *Ostrinia nubilalis* mitochondrial genome sequence variation predicted from alignment of novel assemblies (MT492030.1 to MT492037.1) compared to the reference (Ref) AF442957.1 accession (RefSeq NC\_003367.1). Position of alternate (Alt) single nucleotide variants (SNV;  $n = 73$ ), insertion ( $n = 5$ ), and deletion variations ( $n = 4$ ) are with respect to the Ref, with each Alt nucleotide (A, T, G, or C) at each SNV, insertion, or deletion position provided. Predicted amino acid (AA) changes are shown for protein coding sequences, with those resulting in AA change (nonsynonymous; nonsyn) or no change (synonymous; syn) are indicated. Two insertion and deletion mutations resulting in a single frameshift in the *coxI* gene are indicated by an asterisk with codon-wise sequences CATATT (HI) and ATATTA (ML) listed, with alignment depicting predicted frameshift provided in Fig. 3B). # indicates the predicted deletion within *nd4* within our assemblies MT492030.1 to MT492037.1 compared to the reference, and shown to be conserved among *Ostrinia* and other species of Lepidoptera (Fig. 4) and putatively resulting from Sanger sequencing error in AF442957.1. Positions marked with a plus (+) are mutations previously described by Coates et al. (2004), wherein substitutions also marked with H or S were validated using *HaeIII* and *Sau3AI* PCR-RFLP assays, respectively.

| Feature             | Variant   |            |         |         | Ref        |    | Alt     |    | Change |      |
|---------------------|-----------|------------|---------|---------|------------|----|---------|----|--------|------|
|                     | Position  | Type       | Ref     | Alt     | Codon      | AA | Codon   | AA | Type   | Freq |
| tRNA <sup>Gln</sup> | 160       | SNV        | C       | A       |            |    |         |    |        | 0.88 |
| <i>nd2</i>          | 469       | SNV        | A       | T       | TTA        | L  | TTT     | F  | Nonsyn | 0.88 |
| <i>coxI</i>         | 1,462     | SNV        | C       | A       | ACC        | T  | ACA     | T  | Syn    | 1.00 |
| <i>coxI</i>         | 2,047+    | SNV        | C       | T       | GCC        | A  | GCT     | A  | Syn    | 1.00 |
| <i>coxI</i>         | 2,048     | SNV        | T       | A       | TTC        | F  | ATC     | I  | Nonsyn | 0.88 |
| <i>coxI</i>         | 2,060     | SNV        | AC      | TT      | ACA        | T  | TTA     | L  | Nonsyn | 1.00 |
| <i>coxI</i>         | 2,149     | SNV        | T       | A       | GGT        | G  | GGA     | G  | Syn    | 0.88 |
| <i>coxI</i>         | 2,161+    | SNV        | G       | T       | GTG        | V  | GTT     | V  | Syn    | 1.00 |
| <i>coxI</i>         | 2,196     | Deletion*  | A       | -       | TCC        | S  | TCA     | S  | Syn    | 0.50 |
| <i>coxI</i>         | 2197-2202 | Frameshift | ATA TTA | CAT ATT | ATA TTA    | ML | CAT ATT | HI | Nonsyn | 0.50 |
| <i>coxI</i>         | 2,205     | Insertion* | -       | A       | TTA        | I  | ATT     | L  | Nonsyn | 0.50 |
| <i>coxI</i>         | 2,233     | SNV        | T       | A       | ACT        | T  | ACA     | T  | Syn    | 1.00 |
| <i>coxI</i>         | 2,513+    | SNV        | C       | T       | CCA        | P  | TCA     | S  | Nonsyn | 0.88 |
| <i>coxI</i>         | 2,554+H   | SNV        | G       | A       | GTG        | V  | GTA     | V  | Syn    | 0.88 |
| <i>coxI</i>         | 2,826+    | SNV        | G       | T       | GGG        | G  | GTG     | V  | Nonsyn | 0.88 |
| <i>coxI</i>         | 2,908     | SNV        | G       | T       | ATG        | M  | ATT     | I  | Nonsyn | 0.88 |
| <i>coxI</i>         | 2,922     | SNV        | TC      | AT      | ATC or ATT | I  | AAT     | N  | Nonsyn | 0.88 |
| <i>coxII</i>        | 3,050+S   | SNV        | C       | G       | TCG        | S  | TGG     | W  | Nonsyn | 0.75 |
| <i>coxII</i>        | 3,207     | SNV        | A       | T       | CTA        | L  | CTT     | L  | Syn    | 0.75 |
| <i>coxII</i>        | 3,237     | SNV        | T       | A       | ACT        | T  | ACA     | T  | Syn    | 0.75 |
| <i>coxII</i>        | 3,243     | SNV        | A       | T       | ATG        | M  | ATT     | I  | Nonsyn | 0.75 |
| <i>coxII</i>        | 3,384     | SNV        | C       | T       | AAC        | N  | AAT     | N  | Syn    | 0.63 |

| Feature             | Variant  |           |     |     | Ref   |    | Alt   |    | Change |      |
|---------------------|----------|-----------|-----|-----|-------|----|-------|----|--------|------|
|                     | Position | Type      | Ref | Alt | Codon | AA | Codon | AA | Type   | Freq |
| <i>coxII</i>        | 3,554+   | SNV       | G   | T   | GGA   | G  | GTA   | V  | Nonsyn | 1.00 |
| <i>coxII</i>        | 3,704    | SNV       | G   | C   | TGG   | W  | TCG   | S  | Nonsyn | 0.13 |
| tRNA <sup>Asp</sup> | 3,832    | SNV       | T   | A   |       |    |       |    |        | 0.75 |
| tRNA <sup>Asp</sup> | 3,842    | SNV       | T   | A   |       |    |       |    |        | 0.13 |
| <i>atp8</i>         | 3,953    | Insertion | --- | ATT | ---   | -  | ATT   | I  |        | 0.13 |
| <i>atp6</i>         | 4,462    | SNV       | T   | A   | AAT   | N  | AAA   | K  | Nonsyn | 0.13 |
| <i>atp6</i>         | 4,464    | SNV       | T   | G   | ATT   | I  | AGT   | S  | Nonsyn | 0.13 |
| <i>atp6</i>         | 4,467    | SNV       | T   | C   | ATT   | I  | ACT   | T  | Nonsyn | 0.13 |
| <i>atp6</i>         | 4,470    | SNV       | G   | C   | CGA   | R  | CCA   | P  | Nonsyn | 0.13 |
| <i>atp6</i>         | 4,472    | SNV       | C   | A   | CCT   | P  | ACT   | T  | Nonsyn | 0.13 |
| <i>atp6</i>         | 4,610    | SNV       | C   | C   | CTA   | L  | TTA   | L  | Syn    | 0.13 |
| <i>coxIII</i>       | 4,789    | SNV       | G   | A   | GAA   | E  | AAA   | K  | Nonsyn | 0.88 |
| <i>coxIII</i>       | 5,136    | SNV       | T   | C   | CAT   | H  | CAC   | H  | Syn    | 0.75 |
| <i>nd3</i>          | 5,856    | SNV       | G   | A   | GGG   | G  | GGA   | G  | Syn    | 0.38 |
| tRNA <sup>Ala</sup> | 5,931    | Insertion | A-  | AA  |       |    |       |    |        | 0.88 |
| tRNA <sup>Ala</sup> | 5,963    | Insertion | A-  | AA  |       |    |       |    |        | 0.88 |
| tRNA <sup>Glu</sup> | 6,190    | SNV       | T   | A   |       |    |       |    |        | 1.00 |
| <i>nd5</i>          | 6,507    | SNV       | G   | A   | ACC   | T  | ACT   | T  | Syn    | 1.00 |
| <i>nd5</i> <comp>   | 6,570    | SNV       | T   | A   | ATG   | M  | ATT   | I  | Nonsyn | 1.00 |
| <i>nd5</i> <comp>   | 6,579    | SNV       | G   | A   | ACC   | T  | ACT   | T  | Syn    | 1.00 |
| <i>nd5</i> <comp>   | 6,588    | SNV       | T   | A   | TTA   | L  | TTT   | F  | Nonsyn | 1.00 |
| <i>nd5</i> <comp>   | 6,995    | SNV       | C   | T   | GCT   | A  | ACT   | T  | Nonsyn | 0.38 |
| <i>nd5</i> <comp>   | 7,046    | SNV       | T   | C   | ATT   | I  | GTT   | V  | Nonsyn | 0.38 |
| <i>nd5</i> <comp>   | 7,325    | SNV       | G   | A   | CTA   | L  | TTA   | L  | Syn    | 0.50 |
| <i>nd5</i> <comp>   | 7,551    | SNV       | T   | A   | GGA   | G  | GGT   | G  | Syn    | 0.88 |
| <i>nd5</i> <comp>   | 7,653    | SNV       | GAT | ATA | ATC   | I  | TAT   | Y  | Nonsyn | 1.00 |
| <i>nd5</i> <comp>   | 7,654    | SNV       | A   | T   | ATC   | I  | TAT   | Y  | Nonsyn | 1.00 |
| <i>nd5</i> <comp>   | 7,655    | SNV       | T   | A   | ATC   | I  | TAT   | Y  | Nonsyn | 1.00 |
| <i>nd5</i> <comp>   | 7,713    | SNV       | A   | T   | GTT   | V  | GTA   | V  | Syn    | 1.00 |
| <i>nd5</i> <comp>   | 7,749    | SNV       | C   | A   | TTG   | L  | TTT   | F  | Nonsyn | 0.88 |
| <i>nd5</i> <comp>   | 7,757    | SNV       | C   | A   | GTT   | V  | TTT   | F  | Nonsyn | 0.88 |
| tRNA <sup>His</sup> | 8,060    | SNV       | T   | C   |       |    |       |    |        | 0.13 |
| <i>nd4</i> <comp>   | 8,194    | Deletion# | G   | -   | TCA   | S  | GTA   | V  | Nonsyn | 1.00 |
| <i>nd4</i> <comp>   | 8,318    | SNV       | G   | A   | CCT   | P  | CTT   | L  | Nonsyn | 0.75 |
| <i>nd4</i> <comp>   | 8,415    | SNV       | C   | A   | TGG   | W  | TTG   | L  | Nonsyn | 0.88 |
| <i>nd4L</i> <comp>  | 9,604    | SNV       | C   | S   | GTA   | V  | TTA   | L  | Nonsyn | 1.00 |

| Feature             | Variant  |           |     |     | Ref   |    | Alt   |    | Change |      |
|---------------------|----------|-----------|-----|-----|-------|----|-------|----|--------|------|
|                     | Position | Type      | Ref | Alt | Codon | AA | Codon | AA | Type   | Freq |
| <i>nd4L</i> <comp>  | 9,605    | SNV       | ATA | CAT | TAT   | Y  | ATG   | M  | Nonsyn | 1.00 |
| <i>cytb</i>         | 10,511   | SNV       | G   | A   | CCG   | P  | CCA   | P  | Syn    | 0.88 |
| <i>cytb</i>         | 10,517   | SNV       | C   | A   | CCC   | P  | CCA   | P  | Syn    | 0.50 |
| <i>cytb</i>         | 10,601   | SNV       | C   | A   | ACC   | T  | ACA   | T  | Syn    | 0.75 |
| <i>cytb</i>         | 11,315   | SNV       | G   | T   | GGG   | G  | GGT   | G  | Syn    | 0.63 |
| <i>nd1</i> <comp>   | 11,700   | SNV       | C   | A   | ATG   | M  | ATT   | I  | Nonsyn | 0.63 |
| <i>nd1</i> <comp>   | 12,574   | SNV       | G   | A   | CCT   | P  | CTT   | L  | Nonsyn | 1.00 |
| rRNA <sup>LSU</sup> | 12,787   | SNV       | A   | G   |       |    |       |    |        | 0.13 |
| rRNA <sup>LSU</sup> | 12,788   | SNV       | A   | T   |       |    |       |    |        | 0.13 |
| rRNA <sup>LSU</sup> | 12,790   | SNV       | A   | C   |       |    |       |    |        | 0.13 |
| rRNA <sup>LSU</sup> | 12,795   | SNV       | A   | G   |       |    |       |    |        | 0.13 |
| rRNA <sup>LSU</sup> | 12,796   | SNV       | A   | G   |       |    |       |    |        | 0.13 |
| rRNA <sup>LSU</sup> | 12,799   | SNV       | A   | T   |       |    |       |    |        | 0.13 |
| rRNA <sup>LSU</sup> | 13,131   | Insertion | -   | T   |       |    |       |    |        | 0.88 |
| rRNA <sup>LSU</sup> | 13,153   | Deletion  | A   | -   |       |    |       |    |        | 0.75 |
| rRNA <sup>LSU</sup> | 13,733   | Deletion  | G   | -   |       |    |       |    |        | 0.25 |
| rRNA <sup>LSU</sup> | 13,778   | SNV       | G   | A   |       |    |       |    |        | 0.38 |
| rRNA <sup>LSU</sup> | 13,825   | SNV       | T   | A   |       |    |       |    |        | 0.38 |
| rRNA <sup>LSU</sup> | 13,925   | SNV       | C   | A   |       |    |       |    |        | 0.50 |
| rRNA <sup>SSU</sup> | 14,240   | SNV       | A   | T   |       |    |       |    |        | 0.75 |
| rRNA <sup>SSU</sup> | 14,241   | SNV       | A   | T   |       |    |       |    |        | 0.75 |
| rRNA <sup>SSU</sup> | 14,242   | SNV       | A   | T   |       |    |       |    |        | 0.75 |
| rRNA <sup>SSU</sup> | 14,245   | SNV       | C   | A   |       |    |       |    |        | 0.75 |
| rRNA <sup>SSU</sup> | 14,463   | SNV       | G   | A   |       |    |       |    |        | 1.00 |
| rRNA <sup>SSU</sup> | 14,528   | SNV       | A   | T   |       |    |       |    |        | 0.13 |



**Table S3.** Location of substitutions and indels within the *Ostrinia nubilalis* mitochondrial genome reference (AF442957.1) and *de novo* assembled mitochondrial genomes from eight F<sub>1</sub> families [F1 Family ID (accession MT49xxxx.1)].

| Feature             | Ref   | Position in assemblies from each F <sub>1</sub> Family |                   |                   |                   |                   |                   |                   |                   |
|---------------------|-------|--------------------------------------------------------|-------------------|-------------------|-------------------|-------------------|-------------------|-------------------|-------------------|
|                     |       | ID_02<br>(2030.1)                                      | ID_03<br>(2030.1) | ID_04<br>(2030.1) | ID_06<br>(2030.1) | ID_07<br>(2030.1) | ID_11<br>(2030.1) | ID_12<br>(2030.1) | ID_18<br>(2030.1) |
| tRNA <sup>Gln</sup> | 160   | 351                                                    | 443               | 315               | 247               | 247               | 283               | 261               | 361               |
| <i>nd2</i>          | 469   | 660                                                    | 752               | 624               | 556               | 556               | 592               | 570               | 670               |
| <i>coxI</i>         | 1,462 | 1,652                                                  | 1,745             | 1,616             | 1,548             | 1,548             | 1,584             | 1,562             | 1,663             |
| <i>coxI</i>         | 2,047 | 2,237                                                  | 2,330             | 2,201             | 2,133             | 2,133             | 2,169             | 2,147             | 2,248             |
| <i>coxI</i>         | 2,048 | 2,238                                                  | 2,331             | 2,202             | 2,134             | 2,134             | 2,170             | 2,148             | 2,249             |
| <i>coxI</i>         | 2,060 | 2,250                                                  | 2,343             | 2,214             | 2,146             | 2,146             | 2,182             | 2,160             | 2,261             |
| <i>coxI</i>         | 2,061 | 2,251                                                  | 2,344             | 2,215             | 2,147             | 2,147             | 2,183             | 2,161             | 2,262             |
| <i>coxI</i>         | 2,149 | 2,339                                                  | 2,432             | 2,303             | 2,235             | 2,235             | 2,271             | 2,249             | 2,350             |
| <i>coxI</i>         | 2,161 | 2,351                                                  | 2,444             | 2,315             | 2,247             | 2,247             | 2,283             | 2,261             | 2,362             |
| <i>coxI</i>         | 2,196 | 2,386                                                  | 2,479             | 2,350             | 2,282             | 2,282             | 2,318             | 2,296             | 2,397             |
| <i>coxI</i>         | 2,205 | 2,396                                                  | 2,488             | 2,359             | 2,291             | 2,291             | 2,328             | 2,306             | 2,407             |
| <i>coxI</i>         | 2,233 | 2,423                                                  | 2,516             | 2,387             | 2,319             | 2,319             | 2,355             | 2,333             | 2,434             |
| <i>coxI</i>         | 2,513 | 2,703                                                  | 2,796             | 2,667             | 2,599             | 2,599             | 2,635             | 2,613             | 2,714             |
| <i>coxI</i>         | 2,554 | 2,744                                                  | 2,837             | 2,708             | 2,640             | 2,640             | 2,676             | 2,654             | 2,755             |
| <i>coxI</i>         | 2,826 | 3,016                                                  | 3,109             | 2,980             | 2,912             | 2,912             | 2,948             | 2,926             | 3,027             |
| <i>coxI</i>         | 2,908 | 3,098                                                  | 3,191             | 3,062             | 2,994             | 2,994             | 3,030             | 3,008             | 3,109             |
| <i>coxI</i>         | 2,922 | 3,112                                                  | 3,205             | 3,076             | 3,008             | 3,008             | 3,044             | 3,022             | 3,123             |
| <i>coxI</i>         | 2,923 | 3,113                                                  | 3,206             | 3,077             | 3,009             | 3,009             | 3,045             | 3,023             | 3,124             |
| <i>coxII</i>        | 3,050 | 3,240                                                  | 3,333             | 3,204             | 3,136             | 3,136             | 3,172             | 3,150             | 3,251             |
| <i>coxII</i>        | 3,207 | 3,397                                                  | 3,490             | 3,361             | 3,293             | 3,293             | 3,329             | 3,307             | 3,408             |
| <i>coxII</i>        | 3,237 | 3,427                                                  | 3,520             | 3,391             | 3,323             | 3,323             | 3,359             | 3,337             | 3,438             |
| <i>coxII</i>        | 3,243 | 3,433                                                  | 3,526             | 3,397             | 3,329             | 3,329             | 3,365             | 3,343             | 3,444             |
| <i>coxII</i>        | 3,384 | 3,574                                                  | 3,667             | 3,538             | 3,470             | 3,470             | 3,506             | 3,484             | 3,585             |
| <i>coxII</i>        | 3,554 | 3,744                                                  | 3,837             | 3,708             | 3,640             | 3,640             | 3,676             | 3,654             | 3,755             |
| <i>coxII</i>        | 3,704 | 3,894                                                  | 3,987             | 3,858             | 3,790             | 3,790             | 3,826             | 3,804             | 3,905             |
| tRNA <sup>Asp</sup> | 3,832 | 4,022                                                  | 4,115             | 3,986             | 3,918             | 3,918             | 3,954             | 3,932             | 4,033             |
| tRNA <sup>Asp</sup> | 3,842 | 4,032                                                  | 4,125             | 3,996             | 3,928             | 3,928             | 3,964             | 4,032             | 4,043             |
| <i>atp8</i>         | 3,953 | 4,143                                                  | 4,236             | 4,107             | 4,039             | 4,039             | 4,075             | 4,053             | 4,154             |
| <i>atp6</i>         | 4,462 | 4,652                                                  | 4,745             | 4,619             | 4,548             | 4,548             | 4,584             | 4,562             | 4,663             |
| <i>atp6</i>         | 4,464 | 4,654                                                  | 4,747             | 4,621             | 4,550             | 4,550             | 4,586             | 4,564             | 4,665             |
| <i>atp6</i>         | 4,467 | 4,657                                                  | 4,750             | 4,624             | 4,553             | 4,553             | 4,589             | 4,567             | 4,668             |
| <i>atp6</i>         | 4,470 | 4,660                                                  | 4,753             | 4,627             | 4,556             | 4,556             | 4,592             | 4,570             | 4,671             |
| <i>atp6</i>         | 4,472 | 4,662                                                  | 4,755             | 4,629             | 4,558             | 4,558             | 4,594             | 4,572             | 4,673             |
| <i>atp6</i>         | 4,610 | 4,800                                                  | 4,893             | 4,767             | 4,696             | 4,696             | 4,732             | 4,710             | 4,811             |
| <i>coxIII</i>       | 4,789 | 4,979                                                  | 5,072             | 4,946             | 4,875             | 4,875             | 4,911             | 4,889             | 4,990             |
| <i>coxIII</i>       | 5,136 | 5,326                                                  | 5,419             | 5,293             | 5,222             | 5,222             | 5,258             | 5,236             | 5,337             |
| <i>nd3</i>          | 5,856 | 6,046                                                  | 6,139             | 6,013             | 5,942             | 5,942             | 5,978             | 5,956             | 6,057             |
| tRNA <sup>Ala</sup> | 5,931 | 6,121                                                  | 6,214             | 6,088             | 6,017             | 6,017             | 6,053             | 6,031             | 6,132             |
| tRNA <sup>Ala</sup> | 5,963 | 6,154                                                  | 6,247             | 6,120             | 6,050             | 6,050             | 6,086             | 6,064             | 6,165             |
| tRNA <sup>Glu</sup> | 6,190 | 6,381                                                  | 6,474             | 6,347             | 6,277             | 6,277             | 6,313             | 6,291             | 6,392             |
| <i>nd5</i>          | 6,507 | 6,698                                                  | 6,791             | 6,664             | 6,594             | 6,594             | 6,630             | 6,608             | 6,709             |
| <i>nd5</i>          | 6,570 | 6,761                                                  | 6,854             | 6,727             | 6,657             | 6,657             | 6,693             | 6,671             | 6,772             |
| <i>nd5</i>          | 6,579 | 6,770                                                  | 6,863             | 6,736             | 6,666             | 6,666             | 6,702             | 6,680             | 6,781             |
| <i>nd5</i>          | 6,588 | 6,779                                                  | 6,872             | 6,745             | 6,675             | 6,675             | 6,711             | 6,689             | 6,790             |
| <i>nd5</i>          | 6,995 | 7,186                                                  | 7,279             | 7,152             | 7,082             | 7,082             | 7,118             | 7,096             | 7,197             |
| <i>nd5</i>          | 7,046 | 7,237                                                  | 7,330             | 7,203             | 7,133             | 7,133             | 7,169             | 7,147             | 7,248             |
| <i>nd5</i>          | 7,325 | 7,516                                                  | 7,609             | 7,482             | 7,412             | 7,412             | 7,448             | 7,426             | 7,527             |
| <i>nd5</i>          | 7,551 | 7,742                                                  | 7,835             | 7,708             | 7,638             | 7,638             | 7,674             | 7,652             | 7,753             |
| <i>nd5</i>          | 7,653 | 7,844                                                  | 7,937             | 7,810             | 7,740             | 7,740             | 7,776             | 7,754             | 7,855             |
| <i>nd5</i>          | 7,654 | 7,845                                                  | 7,938             | 7,811             | 7,741             | 7,741             | 7,777             | 7,755             | 7,856             |
| <i>nd5</i>          | 7,655 | 7,846                                                  | 7,939             | 7,812             | 7,742             | 7,742             | 7,778             | 7,756             | 7,857             |
| <i>nd5</i>          | 7,713 | 7,904                                                  | 7,997             | 7,870             | 7,800             | 7,800             | 7,836             | 7,814             | 7,915             |
| <i>nd5</i>          | 7,749 | 7,940                                                  | 8,033             | 7,906             | 7,836             | 7,836             | 7,872             | 7,850             | 7,951             |
| <i>nd5</i>          | 7,757 | 7,948                                                  | 8,041             | 7,914             | 7,844             | 7,844             | 7,880             | 7,858             | 7,959             |
| tRNA <sup>His</sup> | 8,060 | 8,251                                                  | 8,344             | 8,217             | 8,147             | 8,147             | 8,183             | 8,161             | 8,262             |
| <i>nd4</i>          | 8,194 | 8,391                                                  | 8,484             | 8,357             | 8,287             | 8,287             | 8,323             | 8,301             | 8,402             |

| Feature             | Ref    | Position in assemblies from each F <sub>1</sub> Family |                   |                   |                   |                   |                   |                   |                   |
|---------------------|--------|--------------------------------------------------------|-------------------|-------------------|-------------------|-------------------|-------------------|-------------------|-------------------|
|                     |        | ID_02<br>(2030.1)                                      | ID_03<br>(2030.1) | ID_04<br>(2030.1) | ID_06<br>(2030.1) | ID_07<br>(2030.1) | ID_11<br>(2030.1) | ID_12<br>(2030.1) | ID_18<br>(2030.1) |
| <i>nd4</i>          | 8,318  | 8,513                                                  | 8,606             | 8,479             | 8,409             | 8,409             | 8,445             | 8,423             | 8,524             |
| <i>nd4</i>          | 8,415  | 8,610                                                  | 8,703             | 8,576             | 8,506             | 8,506             | 8,542             | 8,520             | 8,621             |
| <i>nd4L</i>         | 9,604  | 9,604                                                  | 9,887             | 9,760             | 9,690             | 9,690             | 9,726             | 9,704             | 9,805             |
| <i>nd4L</i>         | 9,605  | 9,605                                                  | 9,888             | 9,761             | 9,691             | 9,691             | 9,727             | 9,705             | 9,806             |
| <i>nd4L</i>         | 9,606  | 9,606                                                  | 9,889             | 9,762             | 9,692             | 9,692             | 9,728             | 9,706             | 9,807             |
| <i>nd4L</i>         | 9,607  | 9,607                                                  | 9,890             | 9,763             | 9,693             | 9,693             | 9,729             | 9,707             | 9,808             |
| <i>cytb</i>         | 10,511 | 10,701                                                 | 10,794            | 10,667            | 10,597            | 10,597            | 10,633            | 10,611            | 10,712            |
| <i>cytb</i>         | 10,517 | 10,707                                                 | 10,800            | 10,673            | 10,603            | 10,603            | 10,639            | 10,617            | 10,718            |
| <i>cytb</i>         | 10,601 | 10,791                                                 | 10,884            | 10,757            | 10,687            | 10,687            | 10,723            | 10,701            | 10,802            |
| <i>cytb</i>         | 11,315 | 11,505                                                 | 11,598            | 11,471            | 11,401            | 11,401            | 11,437            | 11,415            | 11,516            |
| <i>nd1</i>          | 11,700 | 11,890                                                 | 11,983            | 11,856            | 11,786            | 11,786            | 11,822            | 11,800            | 11,901            |
| <i>nd1</i>          | 12,574 | 12,764                                                 | 12,857            | 12,730            | 12,660            | 12,660            | 12,696            | 12,674            | 12,775            |
| rRNA <sup>LSU</sup> | 12,787 | 12,977                                                 | 13,070            | 12,961            | 12,891            | 12,891            | 12,927            | 12,905            | 13,006            |
| rRNA <sup>LSU</sup> | 12,788 | 12,978                                                 | 13,071            | 12,962            | 12,892            | 12,892            | 12,928            | 12,906            | 13,007            |
| rRNA <sup>LSU</sup> | 12,790 | 12,980                                                 | 13,073            | 12,964            | 12,894            | 12,894            | 12,930            | 12,908            | 13,009            |
| rRNA <sup>LSU</sup> | 12,795 | 12,985                                                 | 13,078            | 12,969            | 12,899            | 12,899            | 12,935            | 12,913            | 13,014            |
| rRNA <sup>LSU</sup> | 12,796 | 12,986                                                 | 13,079            | 12,970            | 12,900            | 12,900            | 12,936            | 12,914            | 13,015            |
| rRNA <sup>LSU</sup> | 12,799 | 12,989                                                 | 13,082            | 12,973            | 12,903            | 12,903            | 12,939            | 12,917            | 13,018            |
| rRNA <sup>LSU</sup> | 13,131 | 13,321                                                 | 13,414            | 13,305            | 13,235            | 13,235            | 13,271            | 13,249            | 13,350            |
| rRNA <sup>LSU</sup> | 13,153 | 13,344                                                 | 13,437            | 13,328            | 13,257            | 13,258            | 12,820            | 13,272            | 13,373            |
| rRNA <sup>LSU</sup> | 13,733 | 13,923                                                 | 14,015            | 13,907            | 13,837            | 13,838            | 13,873            | 13,851            | 13,952            |
| rRNA <sup>LSU</sup> | 13,778 | 13,968                                                 | 14,060            | 13,952            | 13,882            | 13,883            | 13,918            | 13,896            | 13,997            |
| rRNA <sup>LSU</sup> | 13,825 | 14,015                                                 | 14,107            | 13,999            | 13,929            | 13,930            | 13,965            | 13,943            | 14,044            |
| rRNA <sup>LSU</sup> | 13,925 | 14,115                                                 | 14,207            | 14,099            | 14,029            | 14,030            | 14,065            | 14,043            | 14,144            |
| rRNA <sup>SSU</sup> | 14,240 | 14,430                                                 | 14,522            | 14,396            | 14,326            | 14,327            | 14,362            | 14,340            | 14,441            |
| rRNA <sup>SSU</sup> | 14,241 | 14,431                                                 | 14,523            | 14,397            | 14,327            | 14,328            | 14,363            | 14,341            | 14,442            |
| rRNA <sup>SSU</sup> | 14,242 | 14,432                                                 | 14,524            | 14,398            | 14,328            | 14,329            | 14,364            | 14,342            | 14,443            |
| rRNA <sup>SSU</sup> | 14,245 | 14,435                                                 | 14,527            | 14,401            | 14,331            | 14,332            | 14,367            | 14,345            | 14,446            |
| rRNA <sup>SSU</sup> | 14,463 | 14,653                                                 | 14,745            | 14,619            | 14,549            | 14,550            | 14,585            | 14,563            | 14,664            |
| rRNA <sup>SSU</sup> | 14,528 | 14,718                                                 | 14,810            | 14,684            | 14,614            | 14,615            | 14,650            | 14,628            | 14,729            |



| Feature             | Variant |       | Codon (AA) change |           |         | GenBank nr nucleotide database accessions |            |            |            |            |            |            |            |            |  |
|---------------------|---------|-------|-------------------|-----------|---------|-------------------------------------------|------------|------------|------------|------------|------------|------------|------------|------------|--|
|                     | Pos     | Type  | Consensus         | Alternate | Type    | MN792233.1                                | MT492030.1 | MT492031.1 | MT492032.1 | MT492033.1 | MT492034.1 | MT492035.1 | MT492036.1 | MT492037.1 |  |
| <i>nd5</i> <compl>  | 6704    | SNV   | TAC (Y)           | TAT (Y)   | Syn.    | A/6448                                    | G/6602     | G/6695     | G/6568     | G/6498     | G/6498     | G/6534     | G/6512     | G/6613     |  |
| <i>nd5</i> <comp>   | 7288    | SNV   | GCT (A)           | ACT (T)   | Nonsyn. | C/7032                                    | T/7186     | T/7279     | C/7152     | C/7082     | C/7082     | C/7188     | T/7096     | C/7167     |  |
| <i>nd5</i> <comp>   | 7339    | SNV   | GGA (G)           | GGC (G)   | Syn.    | T/7083                                    | C/7237     | C/7330     | T/7203     | T/7133     | T/7133     | T/7169     | C/7147     | T/7248     |  |
| <i>nd5</i> <comp>   | 7618    | SNV   | CTA (L)           | TTA (L)   | Syn.    | G/7362                                    | G/7516     | G/7609     | A/7482     | G/7412     | A/7412     | A/7448     | G/7416     | A/7517     |  |
| <i>nd5</i> <comp>   | 7844    | SNV   | GGT (G)           | GGA (G)   | Syn.    | A/7588                                    | T/7742     | A/7835     | A/7708     | A/7844     | A/7844     | A/7674     | A/7652     | A/7753     |  |
| <i>nd5</i> <comp>   | 8042    | SNV   | TTT (F)           | TTG (L)   | Nonsyn. | A/7786                                    | A/7940     | A/8033     | C/7906     | A/7836     | A/7836     | A/7872     | A/7850     | A/7951     |  |
| <i>nd5</i> <comp>   | 8050    | SNV   | TTA (L)           | TTG (L)   | Syn.    | A/7794                                    | A/7948     | A/8041     | C/7914     | A/7844     | A/7844     | A/7880     | A/7858     | A/7959     |  |
| <i>nd5</i> <comp>   | 8126    | SNV   | TCA (S)           | TCC (S)   | Syn.    | T/7870                                    | T/8024     | G/8117     | T/7990     | T/7920     | T/7920     | T/7956     | T/7934     | T/8035     |  |
| tRNA <sup>His</sup> | 8353    | SNV   | NA                | NA        |         | C/8097                                    | C/8251     | A/8344     | A/8217     | A/8147     | A/8147     | A/8183     | A/8161     | A/8262     |  |
| <i>nd4</i> <comp>   | 8615    | SNV   | TCT (S)           | TCC (S)   | Syn.    | A/8359                                    | A/8513     | G/8606     | A/8479     | A/8409     | A/8409     | A/8445     | A/8423     | G/8524     |  |
| <i>nd4</i> <comp>   | 8712    | SNV   | TTA (L)           | GTA (V)   | Nonsyn. | A/8456                                    | A/8610     | A/8703     | A/8576     | A/8506     | A/8506     | A/8542     | C/8520     | A/8621     |  |
| <i>nd4</i> <comp>   | 8744    | SNV   | CGT (R)           | CGC (R)   | Syn.    | G/8518                                    | A/8672     | A/8765     | A/8638     | A/8568     | A/8568     | A/8604     | A/8582     | A/8683     |  |
| <i>cytb</i>         | 10803   | SNV   | CCA (P)           | CCG (P)   | Syn.    | A/10547                                   | A/10701    | A/10794    | G/10667    | A/10597    | A/10597    | A/10633    | A/10611    | A/10712    |  |
| <i>cytb</i>         | 10809   | SNV   | CCA (P)           | CCC (P)   | Syn.    | A/10553                                   | C/10707    | C/10800    | C/10673    | A/10603    | A/10603    | A/10639    | C/10617    | A/10718    |  |
| <i>cytb</i>         | 10893   | SNV   | ACA (T)           | CCA (P)   | Nonsyn. | A/10637                                   | A/10791    | A/10884    | C/10757    | A/10687    | A/10687    | C/10723    | A/10701    | A/10802    |  |
| <i>cytb</i>         | 11607   | SNV   | GGT (G)           | GGG (G)   | Syn.    | T/11351                                   | T/11505    | T/11598    | G/11471    | G/11401    | T/11401    | G/11437    | T/11415    | T/11516    |  |
| <i>nd1</i> <comp>   | 11992   | SNV   | ATT (I)           | ATG (M)   | Nonsyn. | A/11736                                   | A/11890    | A/11983    | A/11856    | C/11786    | C/11786    | C/11822    | A/11800    | A/11901    |  |
| rRNA <sup>LSU</sup> | 13079   | SNV   | NA                | NA        |         | A/12823                                   | A/12977    | A/13070    | A/12943    | A/12873    | A/12873    | A/12909    | A/12887    | G/12988    |  |
| rRNA <sup>LSU</sup> | 13080   | SNV   | NA                | NA        |         | A/12824                                   | A/12978    | A/13071    | A/12944    | A/12874    | A/12874    | A/12910    | A/12888    | T/12989    |  |
| rRNA <sup>LSU</sup> | 13082   | SNV   | NA                | NA        |         | A/12826                                   | A/12980    | A/13073    | A/12946    | A/12876    | A/12876    | A/12912    | A/12890    | C/12991    |  |
| rRNA <sup>LSU</sup> | 13087   | SNV   | NA                | NA        |         | A/12831                                   | A/12985    | A/13078    | A/12951    | A/12881    | A/12881    | A/12917    | A/12895    | G/12996    |  |
| rRNA <sup>LSU</sup> | 13088   | SNV   | NA                | NA        |         | A/12832                                   | A/12986    | A/13079    | A/12952    | A/12882    | A/12882    | A/12918    | A/12896    | G/12997    |  |
| rRNA <sup>LSU</sup> | 13091   | SNV   | NA                | NA        |         | A/12835                                   | A/12989    | A/13082    | A/12955    | A/12885    | A/12885    | A/12921    | A/12899    | T/13000    |  |
| rRNA <sup>LSU</sup> | 13424   | indel | NA                | NA        |         | T/13168                                   | T/13322    | T/13415    | T/13288    | -/NA       | T/13218    | T/13254    | T/13232    | T/13333    |  |
| rRNA <sup>LSU</sup> | 13450   | indel | NA                | NA        |         | -/NA                                      | -/NA       | -/NA       | -/NA       | A/13243    | A/13244    | -/NA       | -/NA       | -/NA       |  |
| rRNA <sup>LSU</sup> | 13863   | SNV   | NA                | NA        |         | C/13606                                   | T/13760    | T/13853    | T/13726    | T/13656    | T/13657    | T/13692    | T/13670    | T/13771    |  |
| rRNA <sup>LSU</sup> | 14027   | indel | NA                | NA        |         | -/NA                                      | G/13924    | -/NA       | G/13890    | G/13820    | G/13821    | G/13856    | G/13834    | G/13935    |  |
| rRNA <sup>LSU</sup> | 14071   | SNV   | NA                | NA        |         | A/13813                                   | A/13968    | G/14060    | G/13934    | G/13864    | G/13865    | A/13900    | G/13878    | G/13979    |  |
| rRNA <sup>LSU</sup> | 14079   | SNV   | NA                | NA        |         | T/13821                                   | C/13976    | C/14068    | C/13942    | C/13872    | C/13873    | C/13908    | C/13886    | C/13987    |  |
| rRNA <sup>LSU</sup> | 14118   | SNV   | NA                | NA        |         | A/13860                                   | A/14015    | T/14107    | T/13981    | T/13911    | T/13912    | A/13947    | A/13925    | T/14026    |  |
| rRNA <sup>LSU</sup> | 14218   | SNV   | NA                | NA        |         | A/13960                                   | C/14115    | A/14207    | C/14081    | A/14011    | A/14012    | A/14047    | C/14025    | C/14126    |  |
| rRNA <sup>SSU</sup> | 14533-5 | SNVs  | NA                | NA        |         | TTT/14275                                 | AAA/14430  | TTT/14522  | AAA/14396  | TTT/14326  | TTT/14327  | TTT/14362  | TTT/14340  | TTT/14441  |  |
| rRNA <sup>SSU</sup> | 14538   | SNV   | NA                | NA        |         | A/14280                                   | A/14435    | A/14527    | C/14401    | A/14331    | C/14332    | A/14367    | A/14345    | A/14446    |  |
| rRNA <sup>SSU</sup> | 14559   | indel | NA                | NA        |         | A/14301                                   | -/NA       | -/NA       | -/NA       | -/NA       | -/NA       | -/NA       | -/NA       | -/NA       |  |
| rRNA <sup>SSU</sup> | 14822   | SNV   | NA                | NA        |         | A/14564                                   | T/14718    | A/14810    | A/14684    | A/14614    | A/14615    | A/14650    | A/14628    | A/14729    |  |
| rRNA <sup>SSU</sup> | 14826   | SNV   | NA                | NA        |         | T/14568                                   | A/14722    | T/14814    | T/14688    | T/14618    | T/14619    | T/14654    | T/14632    | T/14733    |  |
| rRNA <sup>SSU</sup> | 14828   | SNV   | NA                | NA        |         | T/14570                                   | A/14724    | T/14816    | T/14690    | T/14620    | T/14621    | T/14656    | T/14634    | T/14735    |  |

**Table S5.** Example Linux shell commands to 1) align fastq reads to a reference genome and identify reads that meet Phred quality, alignment, and mapq scores, 2) de novo assemble reads and prepare them for annotation, and 3) identify variable positions from de novo assembled sequences and extract sequences that code for associated genes.

| Objective | Specifically                                                                                                  | Code                                                                                                                                                                                                                                                                                                                                                                                              |
|-----------|---------------------------------------------------------------------------------------------------------------|---------------------------------------------------------------------------------------------------------------------------------------------------------------------------------------------------------------------------------------------------------------------------------------------------------------------------------------------------------------------------------------------------|
| 1         | Check quality of reads for all fastq files received from ISU DNA Facility                                     | <pre>module load fastqc/0.11.7-d5mgqc7 fastqc ./06Mt-D_S4_L001_R1_001.fastq -o . fastqc ./06Mt-D_S4_L001_R2_001.fastq -o .  module load py-multiqc/1.5-py2-lqqx3ht multiqc .</pre>                                                                                                                                                                                                                |
| 1         | After viewing quality reports, trim the first 15 and last 10 nucleotides from each read                       | <pre>module load trimmomatic/0.36-lkktrba  java -jar /opt/rit/spack-app/linux-rhel7-x86_64/gcc-4.8.5/trimmomatic-0.36-lkktrbakk2a32djk45nokwrtgc6h5mzo/bin/trimmomatic-0.36.jar PE -phred33 -trimlog ./logfile_06mt ./06Mt-D_S4_L001_R1_001.fastq ./06Mt-D_S4_L001_R2_001.fastq ./06mt_R1_paired.fq ./06mt_R1_unpaired.fq ./06mt_R2_paired.fq ./06mt_R2_unpaired.fq HEADCROP:15 TAILCROP:10</pre> |
| 1         | Count to ensure that the proper number of nucleotides have been removed                                       | <pre>head -n 2 ./04Mt-C_S3_L001_R1_001.fastq   tail -n 1   awk '{print length}' head -n 2 ./04mt_R1_paired.fq   tail -n 1   awk '{print length}'</pre>                                                                                                                                                                                                                                            |
| 1         | Align reads to the reference genome and filter for those reads that map to the reference and have a mapq > 30 | <pre>module load bowtie2/2.3.4.1-py2-jl5zqym bowtie2-build -f ../../MtGenome_ECB.fasta ecbmt bowtie2 -x ecbmt -t -p 4 -U ./06mt_R1_paired.fq,./06mt_R2_paired.fq -S 06mt.sam  module load samtools/1.9-k6deoga samtools view -S -b 06mt.sam &gt; 06mt.bam</pre>                                                                                                                                   |

|   |                                                                               |                                                                                                                                                                                                                                                                                                                                                       |
|---|-------------------------------------------------------------------------------|-------------------------------------------------------------------------------------------------------------------------------------------------------------------------------------------------------------------------------------------------------------------------------------------------------------------------------------------------------|
|   |                                                                               | <pre>samtools view -bhF 2 06mt.bam &gt; 06mtmap.bam samtools view -bhq 30 06mtmap.bam &gt; 06mtmapq.bam samtools view -c 06mt.bam samtools view -c 06mtmap.bam samtools view -c 06mtmapq.bam</pre>                                                                                                                                                    |
| 2 | Sort mitochondrial aligned, mitochondrion-enriched reads                      | <pre>module load bowtie2/2.3.4.1-py2-jl5zqym bowtie2-build -f ../../MtGenome_ECB.fasta ecbmt bowtie2 -x ecbmt -t -p 4 -U ./06mt_R1_paired.fq,./06mt_R2_paired.fq -S 06mt.sam  module load samtools/1.9-k6deoga samtools view -S -b 06mt.sam &gt; 06mt.bam samtools sort -o 06mt_s.bam 06mt.bam samtools bam2fq 06mt_s.bam &gt; 06mt_s_all.fastq</pre> |
| 2 | de novo assemble sorted reads                                                 | <pre>module load spades/3.11.1-py2-arfy7sc  plasmidspades.py -s ./06mt_s_all.fastq -o 06mt_s_all_spades</pre>                                                                                                                                                                                                                                         |
| 2 | Blast kmer contigs against reference genome                                   | <pre>module load ncbi-rmblastn/2.6.0-2kyym17  blastn -query K21final_contigs.fasta -subject MtGenome_ECB.fasta -outfmt "6 qseqid sseqid pident length mismatch gapopen qstart qend sstart send evalue bitscore"</pre>                                                                                                                                 |
| 2 | Extract contigs that mapped to reference genome and compile in one fasta file | <pre>awk '{print \$1}' 06k21blast.out &gt; 06k21list.txt awk '{print \$1}' 06k33blast.out &gt; 06k33list.txt awk '{print \$1}' 06k55blast.out &gt; 06k55list.txt  module load seqtk/1.2-by5h1hw  seqtk subseq K21final_contigs.fasta 06k21list.txt &gt; 06k21_final.fasta</pre>                                                                       |

|   |                                                                          |                                                                                                                                                                                                                                           |
|---|--------------------------------------------------------------------------|-------------------------------------------------------------------------------------------------------------------------------------------------------------------------------------------------------------------------------------------|
|   |                                                                          | <pre>seqtk subseq K33final_contigs.fasta 06k33list.txt &gt; 06k33_final.fasta seqtk subseq K55final_contigs.fasta 06k55list.txt &gt; 06k55_final.fasta  cat *.fasta &gt; ./06all.fasta</pre>                                              |
| 2 | Use CAP3 to create one contig                                            | <pre>module load cap3/2015-02-11-2jwa5sb  cap3 06all.fasta</pre>                                                                                                                                                                          |
| 3 | Identify variable positions in comparison to reference genome            | <pre>module load bcftools/1.9-womp5fh  bcftools mpileup -f ./MtGenome_ECB.fasta ./02mt_s.bam   bcftools call --ploidy 1 -mv -Ob -o 02mtcalls.bcf  bcftools view 02mtcalls.bcf   vcfutils.pl varFilter -D 2000 -w 5 &gt; 02mtvar.vcf</pre> |
| 3 | Extract stretch of sequence that codes for genes with variable positions | <pre>module load bedtools2/2.27.1-s2mtpsu  bedtools getfasta -fi AllECBmtGenomes_Submit_BankIT.fasta -bed COI.bed -fo COI.fasta</pre>                                                                                                     |

**Table S6.** Blast table for *de novo* assembled *Ostrinia nubilalis* genomes from enriched and unenriched samples. Total reads acquired from each sample were *de novo* assembled and Blast aligned to determine which contigs represent potential mitochondrial sequences. Higher read depths (RPKM) for contig indicates contigs that were formulated from mitochondrial origin.

| Query Sequence Accession<br><i>qseqid</i> | Assembly ID | Subject Sequence ID/Contig ID<br><i>sseqid</i> | Contig Length | Alignment Length<br><i>length</i> | Percentage of Identical Matches<br><i>percent</i> | Mismatch<br><i>mismatch</i> | Gap Opening<br><i>gapopen</i> | Start of Alignment in Query<br><i>qstart</i> | End of Alignment in Query<br><i>qend</i> | Start of Alignment in Subject<br><i>sstart</i> | End of Alignment in Subject<br><i>send</i> | Expect Value<br><i>evalue</i> | Bit Score<br><i>bitscore</i> | True Alignment Length | Percent Coverage | Total Reads | Reads to Align | RPKM  |
|-------------------------------------------|-------------|------------------------------------------------|---------------|-----------------------------------|---------------------------------------------------|-----------------------------|-------------------------------|----------------------------------------------|------------------------------------------|------------------------------------------------|--------------------------------------------|-------------------------------|------------------------------|-----------------------|------------------|-------------|----------------|-------|
| AF442957.1                                | 02          | NODE_4_length_6530_cov_3705.010005             | 6,530         | 6,533                             | 99.648                                            | 17                          | 6                             | 8,005                                        | 14,535                                   | 1                                              | 6,529                                      | 0                             | 11932                        | 6,527                 | 99.95            | 2,784,696   | 298,415        | 16.40 |
| AF442957.1                                | 02          | NODE_6_length_8006_cov_3516.763452             | 8,006         | 8,010                             | 99.363                                            | 40                          | 9                             | 1                                            | 8,003                                    | 1                                              | 8,006                                      | 0                             | 14499                        | 8,001                 | 99.94            | 2,784,696   | 359,637        | 16.12 |
| AF442957.1                                | 03          | NODE_1_length_263_cov_4820.376033              | 263           | 262                               | 99.618                                            | 1                           | 0                             | 1                                            | 262                                      | 262                                            | 1                                          | 2.36E-136                     | 479                          | 262                   | 99.62            | 3,542,792   | 8,515          | 9.17  |
| AF442957.1                                | 03          | NODE_10_length_44_cov_6822.272727              | 44            | 44                                | 100                                               | 0                           | 0                             | 4,896                                        | 4,939                                    | 44                                             | 1                                          | 7.76E-17                      | 82.4                         | 44                    | 100.00           | 3,542,792   | 10             | 0.06  |
| AF442957.1                                | 03          | NODE_109_length_39_cov_13.666667               | 39            | 39                                | 97.436                                            | 1                           | 0                             | 12,896                                       | 12,934                                   | 39                                             | 1                                          | 2.17E-12                      | 67.6                         | 39                    | 100.00           | 3,542,792   | 3              | 0.02  |
| AF442957.1                                | 03          | NODE_111_length_194_cov_5445.745342            | 194           | 194                               | 100                                               | 0                           | 0                             | 11,873                                       | 12,066                                   | 194                                            | 1                                          | 3.20E-100                     | 359                          | 194                   | 100.00           | 3,542,792   | 3,082          | 4.48  |
| AF442957.1                                | 03          | NODE_115_length_61_cov_34.785714               | 61            | 61                                | 98.361                                            | 1                           | 0                             | 12,868                                       | 12,928                                   | 1                                              | 61                                         | 1.28E-24                      | 108                          | 61                    | 100.00           | 3,542,792   | 6              | 0.03  |
| AF442957.1                                | 03          | NODE_116_length_61_cov_6862.714286             | 61            | 61                                | 100                                               | 0                           | 0                             | 12,868                                       | 12,928                                   | 1                                              | 61                                         | 2.75E-26                      | 113                          | 61                    | 100.00           | 3,542,792   | 64             | 0.30  |
| AF442957.1                                | 03          | NODE_117_length_807_cov_5695.714470            | 807           | 807                               | 99.876                                            | 1                           | 0                             | 12,094                                       | 12,900                                   | 807                                            | 1                                          | 0                             | 1485                         | 807                   | 100.00           | 3,542,792   | 25,958         | 9.08  |
| AF442957.1                                | 03          | NODE_118_length_39_cov_34.500000               | 39            | 39                                | 97.436                                            | 1                           | 0                             | 12,896                                       | 12,934                                   | 39                                             | 1                                          | 2.17E-12                      | 67.6                         | 39                    | 100.00           | 3,542,792   | 2              | 0.01  |
| AF442957.1                                | 03          | NODE_119_length_1708_cov_5265.923582           | 1,708         | 1,709                             | 99.239                                            | 11                          | 2                             | 6,232                                        | 7,939                                    | 1,708                                          | 1                                          | 0                             | 3083                         | 1,707                 | 99.94            | 3,542,792   | 61,966         | 10.23 |
| AF442957.1                                | 03          | NODE_121_length_44_cov_20.181818               | 44            | 44                                | 97.727                                            | 1                           | 0                             | 4,896                                        | 4,939                                    | 44                                             | 1                                          | 3.61E-15                      | 76.8                         | 44                    | 100.00           | 3,542,792   | 4              | 0.03  |
| AF442957.1                                | 03          | NODE_122_length_657_cov_4376.812500            | 657           | 658                               | 98.784                                            | 5                           | 3                             | 5,575                                        | 6,230                                    | 1                                              | 657                                        | 0                             | 1168                         | 655                   | 99.70            | 3,542,792   | 21,160         | 9.08  |
| AF442957.1                                | 03          | NODE_125_length_38_cov_4.800000                | 38            | 38                                | 97.368                                            | 1                           | 0                             | 264                                          | 301                                      | 1                                              | 38                                         | 7.82E-12                      | 65.8                         | 38                    | 100.00           | 3,542,792   | -              | -     |
| AF442957.1                                | 03          | NODE_126_length_64_cov_7.935484                | 64            | 64                                | 98.438                                            | 1                           | 0                             | 238                                          | 301                                      | 64                                             | 1                                          | 2.75E-26                      | 113                          | 64                    | 100.00           | 3,542,792   | 43             | 0.19  |
| AF442957.1                                | 03          | NODE_127_length_36_cov_10.333333               | 36            | 36                                | 97.222                                            | 1                           | 0                             | 269                                          | 304                                      | 1                                              | 36                                         | 1.01E-10                      | 62.1                         | 36                    | 100.00           | 3,542,792   | -              | -     |
| AF442957.1                                | 03          | NODE_136_length_46_cov_4565.461538             | 46            | 46                                | 100                                               | 0                           | 0                             | 251                                          | 296                                      | 46                                             | 1                                          | 6.00E-18                      | 86.1                         | 46                    | 100.00           | 3,542,792   | 11             | 0.07  |
| AF442957.1                                | 03          | NODE_137_length_38_cov_4454.800000             | 38            | 38                                | 100                                               | 0                           | 0                             | 264                                          | 301                                      | 1                                              | 38                                         | 1.68E-13                      | 71.3                         | 38                    | 100.00           | 3,542,792   | 2              | 0.01  |
| AF442957.1                                | 03          | NODE_14_length_479_cov_6492.801310             | 479           | 479                               | 100                                               | 0                           | 0                             | 3,952                                        | 4,430                                    | 479                                            | 1                                          | 0                             | 885                          | 479                   | 100.00           | 3,542,792   | 15,340         | 9.04  |
| AF442957.1                                | 03          | NODE_140_length_37_cov_5228.000000             | 37            | 37                                | 100                                               | 0                           | 0                             | 12,034                                       | 12,070                                   | 37                                             | 1                                          | 6.04E-13                      | 69.4                         | 37                    | 100.00           | 3,542,792   | 4              | 0.03  |
| AF442957.1                                | 03          | NODE_141_length_678_cov_5749.992248            | 678           | 678                               | 99.853                                            | 1                           | 0                             | 4,930                                        | 5,607                                    | 1                                              | 678                                        | 0                             | 1247                         | 678                   | 100.00           | 3,542,792   | 22,304         | 9.29  |
| AF442957.1                                | 03          | NODE_142_length_56_cov_33.217391               | 56            | 56                                | 98.214                                            | 1                           | 0                             | 4,907                                        | 4,962                                    | 56                                             | 1                                          | 7.71E-22                      | 99                           | 56                    | 100.00           | 3,542,792   | 3              | 0.02  |
| AF442957.1                                | 03          | NODE_143_length_56_cov_6867.304348             | 56            | 56                                | 100                                               | 0                           | 0                             | 4,907                                        | 4,962                                    | 56                                             | 1                                          | 1.66E-23                      | 104                          | 56                    | 100.00           | 3,542,792   | 50             | 0.25  |
| AF442957.1                                | 03          | NODE_150_length_35_cov_4484.000000             | 35            | 35                                | 100                                               | 0                           | 0                             | 272                                          | 306                                      | 1                                              | 35                                         | 7.82E-12                      | 65.8                         | 35                    | 100.00           | 3,542,792   | 2              | 0.02  |
| AF442957.1                                | 03          | NODE_155_length_63_cov_2.800000                | 63            | 63                                | 96.825                                            | 2                           | 0                             | 12,038                                       | 12,100                                   | 1                                              | 63                                         | 4.61E-24                      | 106                          | 63                    | 100.00           | 3,542,792   | 3              | 0.01  |
| AF442957.1                                | 03          | NODE_156_length_37_cov_4.250000                | 37            | 37                                | 97.297                                            | 1                           | 0                             | 12,034                                       | 12,070                                   | 37                                             | 1                                          | 2.81E-11                      | 63.9                         | 37                    | 100.00           | 3,542,792   | 1              | 0.01  |
| AF442957.1                                | 03          | NODE_16_length_63_cov_7074.047619              | 63            | 63                                | 100                                               | 0                           | 0                             | 4,439                                        | 4,501                                    | 63                                             | 1                                          | 2.13E-27                      | 117                          | 63                    | 100.00           | 3,542,792   | 70             | 0.31  |
| AF442957.1                                | 03          | NODE_163_length_42_cov_7.222222                | 42            | 43                                | 97.674                                            | 0                           | 1                             | 6,222                                        | 6,264                                    | 42                                             | 1                                          | 4.67E-14                      | 73.1                         | 42                    | 100.00           | 3,542,792   | -              | -     |
| AF442957.1                                | 03          | NODE_164_length_43_cov_4900.200000             | 43            | 43                                | 100                                               | 0                           | 0                             | 6,222                                        | 6,264                                    | 43                                             | 1                                          | 2.79E-16                      | 80.5                         | 43                    | 100.00           | 3,542,792   | 3              | 0.02  |
| AF442957.1                                | 03          | NODE_167_length_61_cov_33.285714               | 61            | 61                                | 98.361                                            | 1                           | 0                             | 280                                          | 340                                      | 61                                             | 1                                          | 1.28E-24                      | 108                          | 61                    | 100.00           | 3,542,792   | 1              | 0.00  |
| AF442957.1                                | 03          | NODE_17_length_1200_cov_5736.015424            | 1,200         | 1,201                             | 99.667                                            | 3                           | 1                             | 8,005                                        | 9,205                                    | 1,200                                          | 1                                          | 0                             | 2194                         | 1,200                 | 100.00           | 3,542,792   | 42,580         | 10.01 |
| AF442957.1                                | 03          | NODE_17_length_35_cov_7182.428571              | 35            | 35                                | 100                                               | 0                           | 0                             | 4,481                                        | 4,515                                    | 1                                              | 35                                         | 7.82E-12                      | 65.8                         | 35                    | 100.00           | 3,542,792   | 14             | 0.11  |
| AF442957.1                                | 03          | NODE_170_length_214_cov_4046.502762            | 214           | 213                               | 99.531                                            | 1                           | 0                             | 1                                            | 213                                      | 213                                            | 1                                          | 4.08E-109                     | 388                          | 213                   | 99.53            | 3,542,792   | 4,083          | 5.41  |
| AF442957.1                                | 03          | NODE_173_length_62_cov_16.068966               | 62            | 62                                | 98.387                                            | 1                           | 0                             | 235                                          | 296                                      | 1                                              | 62                                         | 3.56E-25                      | 110                          | 62                    | 100.00           | 3,542,792   | 27             | 0.12  |
| AF442957.1                                | 03          | NODE_174_length_725_cov_5243.169075            | 725           | 726                               | 99.725                                            | 0                           | 2                             | 12,930                                       | 13,654                                   | 1                                              | 725                                        | 0                             | 1328                         | 724                   | 99.86            | 3,542,792   | 21,329         | 8.29  |
| AF442957.1                                | 03          | NODE_176_length_61_cov_6312.821429             | 61            | 61                                | 100                                               | 0                           | 0                             | 12,902                                       | 12,962                                   | 61                                             | 1                                          | 2.75E-26                      | 113                          | 61                    | 100.00           | 3,542,792   | 52             | 0.24  |
| AF442957.1                                | 03          | NODE_177_length_59_cov_4.807692                | 59            | 59                                | 96.61                                             | 2                           | 0                             | 238                                          | 296                                      | 1                                              | 59                                         | 7.71E-22                      | 99                           | 59                    | 100.00           | 3,542,792   | -              | -     |



| Query Sequence Accession<br><i>qseqid</i> | Assembly ID | Subject Sequence ID/Contig ID<br><i>sseqid</i> | Contig Length | Alignment Length<br><i>length</i> | Percentage of Identical Matches<br><i>percent</i> | Mismatch<br><i>mismatch</i> | Gap Opening<br><i>gapopen</i> | Start of Alignment in Query<br><i>qstart</i> | End of Alignment in Query<br><i>qend</i> | Start of Alignment in Subject<br><i>sstart</i> | End of Alignment in Subject<br><i>send</i> | Expect Value<br><i>evalue</i> | Bit Score<br><i>bitscore</i> | True Alignment Length | Percent Coverage | Total Reads | Reads to Align | RPKM  |
|-------------------------------------------|-------------|------------------------------------------------|---------------|-----------------------------------|---------------------------------------------------|-----------------------------|-------------------------------|----------------------------------------------|------------------------------------------|------------------------------------------------|--------------------------------------------|-------------------------------|------------------------------|-----------------------|------------------|-------------|----------------|-------|
| AF442957.1                                | 03          | NODE_178_length_64_cov_6.193548                | 64            | 64                                | 95.312                                            | 3                           | 0                             | 238                                          | 301                                      | 1                                              | 64                                         | 5.96E-23                      | 102                          | 64                    | 100.00           | 3,542,792   | 1              | 0.00  |
| AF442957.1                                | 03          | NODE_179_length_941_cov_5097.903084            | 941           | 941                               | 99.894                                            | 1                           | 0                             | 314                                          | 1,254                                    | 1                                              | 941                                        | 0                             | 1733                         | 941                   | 100.00           | 3,542,792   | 29,975         | 8.99  |
| AF442957.1                                | 03          | NODE_18_length_36_cov_4360.666667              | 36            | 36                                | 100                                               | 0                           | 0                             | 269                                          | 304                                      | 1                                              | 36                                         | 2.17E-12                      | 67.6                         | 36                    | 100.00           | 3,542,792   | 1              | 0.01  |
| AF442957.1                                | 03          | NODE_19_length_63_cov_3.866667                 | 63            | 63                                | 98.413                                            | 1                           | 0                             | 12,038                                       | 12,100                                   | 63                                             | 1                                          | 9.90E-26                      | 111                          | 63                    | 100.00           | 3,542,792   | 4              | 0.02  |
| AF442957.1                                | 03          | NODE_23_length_1894_cov_5852.649760            | 1,894         | 1,895                             | 99.261                                            | 11                          | 3                             | 5,587                                        | 7,479                                    | 1,894                                          | 1                                          | 0                             | 3419                         | 1,892                 | 99.89            | 3,542,792   | 68,344         | 10.18 |
| AF442957.1                                | 03          | NODE_29_length_1898_cov_5693.200536            | 1,898         | 1,899                             | 99.789                                            | 2                           | 2                             | 9,209                                        | 11,106                                   | 1,898                                          | 1                                          | 0                             | 3483                         | 1,897                 | 99.95            | 3,542,792   | 67,688         | 10.06 |
| AF442957.1                                | 03          | NODE_30_length_35_cov_6895.428571              | 35            | 35                                | 100                                               | 0                           | 0                             | 4,410                                        | 4,444                                    | 35                                             | 1                                          | 7.82E-12                      | 65.8                         | 35                    | 100.00           | 3,542,792   | 5              | 0.04  |
| AF442957.1                                | 03          | NODE_33_length_521_cov_5543.370000             | 521           | 522                               | 98.659                                            | 5                           | 2                             | 7,483                                        | 8,003                                    | 521                                            | 1                                          | 0                             | 924                          | 520                   | 99.81            | 3,542,792   | 16,708         | 9.03  |
| AF442957.1                                | 03          | NODE_35_length_1113_cov_7002.973443            | 1,113         | 1,113                             | 99.73                                             | 3                           | 0                             | 4,495                                        | 5,607                                    | 1,113                                          | 1                                          | 0                             | 2039                         | 1,113                 | 100.00           | 3,542,792   | 46,564         | 11.81 |
| AF442957.1                                | 03          | NODE_38_length_749_cov_6011.403631             | 749           | 749                               | 99.733                                            | 2                           | 0                             | 11,108                                       | 11,856                                   | 1                                              | 749                                        | 0                             | 1373                         | 749                   | 100.00           | 3,542,792   | 25,966         | 9.79  |
| AF442957.1                                | 03          | NODE_39_length_5674_cov_6560.328498            | 5,674         | 5,677                             | 99.771                                            | 8                           | 5                             | 8,005                                        | 13,679                                   | 1                                              | 5,674                                      | 0                             | 10406                        | 5,672                 | 99.96            | 3,542,792   | 234,621        | 11.67 |
| AF442957.1                                | 03          | NODE_4_length_39_cov_4563.166667               | 39            | 39                                | 100                                               | 0                           | 0                             | 274                                          | 312                                      | 1                                              | 39                                         | 4.67E-14                      | 73.1                         | 39                    | 100.00           | 3,542,792   | 5              | 0.04  |
| AF442957.1                                | 03          | NODE_45_length_56_cov_6544.565217              | 56            | 56                                | 100                                               | 0                           | 0                             | 4,873                                        | 4,928                                    | 56                                             | 1                                          | 1.66E-23                      | 104                          | 56                    | 100.00           | 3,542,792   | 49             | 0.25  |
| AF442957.1                                | 03          | NODE_46_length_2894_cov_6629.362687            | 2,894         | 2,896                             | 99.137                                            | 19                          | 4                             | 1,063                                        | 3,954                                    | 2,894                                          | 1                                          | 0                             | 5204                         | 2,892                 | 99.93            | 3,542,792   | 117,193        | 11.42 |
| AF442957.1                                | 03          | NODE_46_length_44_cov_36.636364                | 44            | 44                                | 97.727                                            | 1                           | 0                             | 4,896                                        | 4,939                                    | 1                                              | 44                                         | 3.61E-15                      | 76.8                         | 44                    | 100.00           | 3,542,792   | 1              | 0.01  |
| AF442957.1                                | 03          | NODE_48_length_354_cov_5815.882883             | 354           | 354                               | 98.87                                             | 4                           | 0                             | 13,996                                       | 14,349                                   | 1                                              | 354                                        | 0                             | 632                          | 354                   | 100.00           | 3,542,792   | 8,298          | 6.62  |
| AF442957.1                                | 03          | NODE_48_length_61_cov_4681.714286              | 61            | 61                                | 100                                               | 0                           | 0                             | 280                                          | 340                                      | 1                                              | 61                                         | 2.75E-26                      | 113                          | 61                    | 100.00           | 3,542,792   | 45             | 0.21  |
| AF442957.1                                | 03          | NODE_5_length_35_cov_7219.714286               | 35            | 35                                | 100                                               | 0                           | 0                             | 4,425                                        | 4,459                                    | 35                                             | 1                                          | 7.82E-12                      | 65.8                         | 35                    | 100.00           | 3,542,792   | 1              | 0.01  |
| AF442957.1                                | 03          | NODE_5_length_39_cov_30.166667                 | 39            | 39                                | 97.436                                            | 1                           | 0                             | 274                                          | 312                                      | 1                                              | 39                                         | 2.17E-12                      | 67.6                         | 39                    | 100.00           | 3,542,792   | 1              | 0.01  |
| AF442957.1                                | 03          | NODE_53_length_49_cov_5299.437500              | 49            | 49                                | 100                                               | 0                           | 0                             | 12,038                                       | 12,086                                   | 49                                             | 1                                          | 1.29E-19                      | 91.6                         | 49                    | 100.00           | 3,542,792   | 22             | 0.13  |
| AF442957.1                                | 03          | NODE_6_length_65_cov_2.093750                  | 65            | 69                                | 94.203                                            | 0                           | 1                             | 1,222                                        | 1,290                                    | 65                                             | 1                                          | 5.96E-23                      | 102                          | 68                    | 104.62           | 3,542,792   | 2              | 0.01  |
| AF442957.1                                | 03          | NODE_60_length_62_cov_4.827586                 | 62            | 62                                | 98.387                                            | 1                           | 0                             | 235                                          | 296                                      | 1                                              | 62                                         | 3.56E-25                      | 110                          | 62                    | 100.00           | 3,542,792   | 29             | 0.13  |
| AF442957.1                                | 03          | NODE_7_length_69_cov_5592.694444               | 69            | 69                                | 100                                               | 0                           | 0                             | 1,222                                        | 1,290                                    | 69                                             | 1                                          | 9.83E-31                      | 128                          | 69                    | 100.00           | 3,542,792   | 47             | 0.19  |
| AF442957.1                                | 03          | NODE_70_length_63_cov_6.933333                 | 63            | 63                                | 98.413                                            | 1                           | 0                             | 12,038                                       | 12,100                                   | 63                                             | 1                                          | 9.90E-26                      | 111                          | 63                    | 100.00           | 3,542,792   | 3              | 0.01  |
| AF442957.1                                | 03          | NODE_73_length_865_cov_4499.622596             | 865           | 865                               | 98.844                                            | 9                           | 1                             | 13,671                                       | 14,535                                   | 865                                            | 2                                          | 0                             | 1541                         | 864                   | 99.88            | 3,542,792   | 33,705         | 11.00 |
| AF442957.1                                | 03          | NODE_74_length_39_cov_6419.000000              | 39            | 39                                | 100                                               | 0                           | 0                             | 12,896                                       | 12,934                                   | 1                                              | 39                                         | 4.67E-14                      | 73.1                         | 39                    | 100.00           | 3,542,792   | 4              | 0.03  |
| AF442957.1                                | 03          | NODE_8_length_820_cov_5848.227785              | 820           | 820                               | 99.878                                            | 1                           | 0                             | 264                                          | 1,083                                    | 1                                              | 820                                        | 0                             | 1509                         | 820                   | 100.00           | 3,542,792   | 26,071         | 8.97  |
| AF442957.1                                | 03          | NODE_81_length_2699_cov_5776.120780            | 2,699         | 2,701                             | 99.074                                            | 19                          | 4                             | 1,258                                        | 3,954                                    | 2,699                                          | 1                                          | 0                             | 4844                         | 2,697                 | 99.93            | 3,542,792   | 107,171        | 11.20 |
| AF442957.1                                | 03          | NODE_9_length_189_cov_4425.261905              | 189           | 188                               | 99.468                                            | 1                           | 0                             | 14,348                                       | 14,535                                   | 1                                              | 188                                        | 3.23E-95                      | 342                          | 188                   | 99.47            | 3,542,792   | 3,265          | 4.90  |
| AF442957.1                                | 03          | NODE_95_length_933_cov_6044.946667             | 933           | 933                               | 99.786                                            | 2                           | 0                             | 3,973                                        | 4,905                                    | 933                                            | 1                                          | 0                             | 1712                         | 933                   | 100.00           | 3,542,792   | 40,698         | 12.31 |
| AF442957.1                                | 03          | NODE_96_length_56_cov_36.130435                | 56            | 56                                | 98.214                                            | 1                           | 0                             | 4,873                                        | 4,928                                    | 1                                              | 56                                         | 7.71E-22                      | 99                           | 56                    | 100.00           | 3,542,792   | 7              | 0.04  |
| AF442957.1                                | 04          | NODE_1_length_39_cov_39.000000                 | 39            | 39                                | 97.436                                            | 1                           | 0                             | 274                                          | 312                                      | 1                                              | 39                                         | 1.97E-12                      | 67.6                         | 39                    | 100.00           | 3,556,284   | -              | -     |
| AF442957.1                                | 04          | NODE_1_length_4097_cov_5979.746075             | 4,097         | 4,099                             | 99.756                                            | 6                           | 4                             | 9,583                                        | 13,679                                   | 1                                              | 4,097                                      | 0                             | 7511                         | 4,095                 | 99.95            | 3,556,284   | 135,617        | 9.30  |
| AF442957.1                                | 04          | NODE_14_length_189_cov_3985.767857             | 189           | 188                               | 99.468                                            | 1                           | 0                             | 14,348                                       | 14,535                                   | 1                                              | 188                                        | 2.92E-95                      | 342                          | 188                   | 99.47            | 3,556,284   | 2,842          | 4.25  |
| AF442957.1                                | 04          | NODE_14_length_61_cov_4395.857143              | 61            | 61                                | 100                                               | 0                           | 0                             | 280                                          | 340                                      | 1                                              | 61                                         | 2.49E-26                      | 113                          | 61                    | 100.00           | 3,556,284   | 26             | 0.12  |
| AF442957.1                                | 04          | NODE_17_length_4029_cov_4913.654154            | 4,029         | 4,031                             | 99.454                                            | 17                          | 5                             | 3,976                                        | 8,003                                    | 4,029                                          | 1                                          | 0                             | 7317                         | 4,026                 | 99.93            | 3,556,284   | 146,804        | 10.24 |
| AF442957.1                                | 04          | NODE_2_length_39_cov_4354.500000               | 39            | 39                                | 100                                               | 0                           | 0                             | 274                                          | 312                                      | 1                                              | 39                                         | 4.22E-14                      | 73.1                         | 39                    | 100.00           | 3,556,284   | 3              | 0.02  |
| AF442957.1                                | 04          | NODE_21_length_1240_cov_6152.636587            | 1,240         | 1,240                             | 98.952                                            | 10                          | 1                             | 2,648                                        | 3,884                                    | 1,240                                          | 1                                          | 0                             | 2215                         | 1,239                 | 99.92            | 3,556,284   | 40,385         | 9.16  |
| AF442957.1                                | 04          | NODE_21_length_877_cov_4209.104265             | 877           | 877                               | 98.86                                             | 9                           | 1                             | 13,659                                       | 14,535                                   | 877                                            | 2                                          | 0                             | 1563                         | 876                   | 99.89            | 3,556,284   | 32,630         | 10.46 |
| AF442957.1                                | 04          | NODE_22_length_267_cov_4582.276423             | 267           | 267                               | 99.625                                            | 1                           | 0                             | 1                                            | 267                                      | 1                                              | 267                                        | 3.54E-139                     | 488                          | 267                   | 100.00           | 3,556,284   | 5,370          | 5.66  |
| AF442957.1                                | 04          | NODE_23_length_468_cov_6078.536913             | 468           | 468                               | 100                                               | 0                           | 0                             | 3,963                                        | 4,430                                    | 1                                              | 468                                        | 0                             | 865                          | 468                   | 100.00           | 3,556,284   | 13,367         | 8.03  |
| AF442957.1                                | 04          | NODE_23_length_5668_cov_5142.774623            | 5,668         | 5,671                             | 99.771                                            | 8                           | 5                             | 8,005                                        | 13,673                                   | 1                                              | 5,668                                      | 0                             | 10395                        | 5,666                 | 99.96            | 3,556,284   | 189,678        | 9.41  |

| Query Sequence<br>Accession<br>qseqid | Assembly<br>ID | Subject Sequence ID/Contig ID<br>sseqid | Contig<br>Length | Alignment<br>Length<br>length | Percentage<br>of Identical<br>Matches<br>pident | Mismatch<br>mismatch | Gap<br>Opening<br>gapopen | Start of<br>Alignment<br>in Query<br>qstart | End of<br>Alignment<br>in Query<br>qend | Start of<br>Alignment<br>in Subject<br>sstart | End of<br>Alignment<br>in Subject<br>send | Expect<br>Value<br>evalue | Bit Score<br>bitscore | True<br>Alignment<br>Length | Percent<br>Coverage | Total<br>Reads | Reads to<br>Align | RPKM  |
|---------------------------------------|----------------|-----------------------------------------|------------------|-------------------------------|-------------------------------------------------|----------------------|---------------------------|---------------------------------------------|-----------------------------------------|-----------------------------------------------|-------------------------------------------|---------------------------|-----------------------|-----------------------------|---------------------|----------------|-------------------|-------|
| AF442957.1                            | 04             | NODE_26_length_100_cov_5119.544304      | 100              | 100                           | 100                                             | 0                    | 0                         | 269                                         | 368                                     | 1                                             | 100                                       | 5.20E-48                  | 185                   | 100                         | 100.00              | 3,556,284      | 519               | 1.46  |
| AF442957.1                            | 04             | NODE_29_length_306_cov_4139.410256      | 306              | 306                           | 99.673                                          | 1                    | 0                         | 1                                           | 306                                     | 1                                             | 306                                       | 7.40E-161                 | 560                   | 306                         | 100.00              | 3,556,284      | 8,791             | 8.08  |
| AF442957.1                            | 04             | NODE_29_length_34_cov_6004.769231       | 34               | 34                            | 100                                             | 0                    | 0                         | 2,635                                       | 2,668                                   | 34                                            | 1                                         | 2.54E-11                  | 63.9                  | 34                          | 100.00              | 3,556,284      | 1                 | 0.01  |
| AF442957.1                            | 04             | NODE_3_length_35_cov_6382.571429        | 35               | 35                            | 100                                             | 0                    | 0                         | 4,425                                       | 4,459                                   | 35                                            | 1                                         | 7.07E-12                  | 65.8                  | 35                          | 100.00              | 3,556,284      | -                 | -     |
| AF442957.1                            | 04             | NODE_31_length_243_cov_5706.333333      | 243              | 243                           | 100                                             | 0                    | 0                         | 5,316                                       | 5,558                                   | 1                                             | 243                                       | 1.67E-127                 | 449                   | 243                         | 100.00              | 3,556,284      | 4,205             | 4.87  |
| AF442957.1                            | 04             | NODE_34_length_525_cov_5158.390873      | 525              | 526                           | 98.669                                          | 5                    | 2                         | 7,491                                       | 8,015                                   | 525                                           | 1                                         | 0                         | 931                   | 524                         | 99.81               | 3,556,284      | 14,606            | 7.81  |
| AF442957.1                            | 04             | NODE_36_length_35_cov_6126.571429       | 35               | 35                            | 100                                             | 0                    | 0                         | 4,410                                       | 4,444                                   | 35                                            | 1                                         | 7.07E-12                  | 65.8                  | 35                          | 100.00              | 3,556,284      | 4                 | 0.03  |
| AF442957.1                            | 04             | NODE_37_length_1585_cov_5748.097826     | 1,585            | 1,587                         | 99.181                                          | 10                   | 3                         | 1,070                                       | 2,655                                   | 1,585                                         | 1                                         | 0                         | 2856                  | 1,584                       | 99.94               | 3,556,284      | 52,586            | 9.32  |
| AF442957.1                            | 04             | NODE_38_length_341_cov_5416.590625      | 341              | 341                           | 98.827                                          | 4                    | 0                         | 14,009                                      | 14,349                                  | 341                                           | 1                                         | 2.60E-175                 | 608                   | 341                         | 100.00              | 3,556,284      | 7,211             | 5.95  |
| AF442957.1                            | 04             | NODE_40_length_705_cov_5458.679825      | 705              | 705                           | 99.858                                          | 1                    | 0                         | 371                                         | 1,075                                   | 1                                             | 705                                       | 0                         | 1297                  | 705                         | 100.00              | 3,556,284      | 17,825            | 7.11  |
| AF442957.1                            | 04             | NODE_41_length_61_cov_22.357143         | 61               | 61                            | 98.361                                          | 1                    | 0                         | 280                                         | 340                                     | 61                                            | 1                                         | 1.16E-24                  | 108                   | 61                          | 100.00              | 3,556,284      | 4                 | 0.02  |
| AF442957.1                            | 04             | NODE_43_length_3643_cov_5033.820776     | 3,643            | 3,645                         | 99.259                                          | 21                   | 4                         | 314                                         | 3,954                                   | 1                                             | 3,643                                     | 0                         | 6577                  | 3,641                       | 99.95               | 3,556,284      | 133,118           | 10.27 |
| AF442957.1                            | 04             | NODE_44_length_880_cov_6476.083818      | 880              | 880                           | 99.659                                          | 3                    | 0                         | 4,439                                       | 5,318                                   | 880                                           | 1                                         | 0                         | 1609                  | 880                         | 100.00              | 3,556,284      | 28,618            | 9.14  |
| AF442957.1                            | 04             | NODE_45_length_39_cov_6816.388889       | 39               | 39                            | 100                                             | 0                    | 0                         | 5,298                                       | 5,336                                   | 1                                             | 39                                        | 4.22E-14                  | 73.1                  | 39                          | 100.00              | 3,556,284      | 5                 | 0.04  |
| AF442957.1                            | 04             | NODE_51_length_1919_cov_5292.404110     | 1,919            | 1,920                         | 99.375                                          | 9                    | 3                         | 5,562                                       | 7,479                                   | 1                                             | 1,919                                     | 0                         | 3476                  | 1,917                       | 99.90               | 3,556,284      | 58,035            | 8.50  |
| AF442957.1                            | 04             | NODE_52_length_1580_cov_5789.840282     | 1,580            | 1,581                         | 99.81                                           | 2                    | 1                         | 8,005                                       | 9,585                                   | 1                                             | 1,580                                     | 0                         | 2902                  | 1,580                       | 100.00              | 3,556,284      | 48,857            | 8.69  |
| AF442957.1                            | 06             | NODE_1_length_511_cov_4590.776151       | 511              | 511                           | 100                                             | 0                    | 0                         | 13,163                                      | 13,673                                  | 1                                             | 511                                       | 0                         | 944                   | 511                         | 100.00              | 2,542,850      | 16,441            | 12.65 |
| AF442957.1                            | 06             | NODE_104_length_187_cov_5200.373494     | 187              | 187                           | 100                                             | 0                    | 0                         | 14,009                                      | 14,195                                  | 1                                             | 187                                       | 2.31E-96                  | 346                   | 187                         | 100.00              | 2,542,850      | 1,861             | 3.91  |
| AF442957.1                            | 06             | NODE_11_length_5156_cov_4949.127464     | 5,156            | 5,159                         | 99.748                                          | 8                    | 5                         | 8,005                                       | 13,161                                  | 5,156                                         | 1                                         | 0                         | 9450                  | 5,154                       | 99.96               | 2,542,850      | 185,493           | 14.14 |
| AF442957.1                            | 06             | NODE_117_length_172_cov_3616.251656     | 172              | 171                           | 99.415                                          | 1                    | 0                         | 14,365                                      | 14,535                                  | 172                                           | 2                                         | 8.43E-86                  | 311                   | 171                         | 99.42               | 2,542,850      | 1,913             | 4.40  |
| AF442957.1                            | 06             | NODE_121_length_38_cov_4889.352941      | 38               | 38                            | 100                                             | 0                    | 0                         | 269                                         | 306                                     | 1                                             | 38                                        | 1.56E-13                  | 71.3                  | 38                          | 100.00              | 2,542,850      | 1                 | 0.01  |
| AF442957.1                            | 06             | NODE_13_length_895_cov_4070.013921      | 895              | 895                           | 98.883                                          | 9                    | 1                         | 13,641                                      | 14,535                                  | 1                                             | 894                                       | 0                         | 1596                  | 894                         | 99.89               | 2,542,850      | 34,173            | 15.02 |
| AF442957.1                            | 06             | NODE_154_length_1535_cov_5870.640687    | 1,535            | 1,535                         | 99.674                                          | 5                    | 0                         | 10,189                                      | 11,723                                  | 1,535                                         | 1                                         | 0                         | 2808                  | 1,535                       | 100.00              | 2,542,850      | 43,268            | 11.09 |
| AF442957.1                            | 06             | NODE_156_length_45_cov_6009.041667      | 45               | 45                            | 100                                             | 0                    | 0                         | 5,322                                       | 5,366                                   | 45                                            | 1                                         | 2.00E-17                  | 84.2                  | 45                          | 100.00              | 2,542,850      | 3                 | 0.03  |
| AF442957.1                            | 06             | NODE_158_length_213_cov_5299.416667     | 213              | 213                           | 100                                             | 0                    | 0                         | 5,346                                       | 5,558                                   | 1                                             | 213                                       | 8.14E-111                 | 394                   | 213                         | 100.00              | 2,542,850      | 2,792             | 5.15  |
| AF442957.1                            | 06             | NODE_166_length_86_cov_5450.938462      | 86               | 86                            | 100                                             | 0                    | 0                         | 9,041                                       | 9,126                                   | 1                                             | 86                                        | 3.23E-40                  | 159                   | 86                          | 100.00              | 2,542,850      | 46                | 0.21  |
| AF442957.1                            | 06             | NODE_170_length_438_cov_5566.424460     | 438              | 438                           | 100                                             | 0                    | 0                         | 9,731                                       | 10,168                                  | 1                                             | 438                                       | 0                         | 809                   | 438                         | 100.00              | 2,542,850      | 9,069             | 8.14  |
| AF442957.1                            | 06             | NODE_181_length_624_cov_5407.877280     | 624              | 624                           | 100                                             | 0                    | 0                         | 11,725                                      | 12,348                                  | 624                                           | 1                                         | 0                         | 1153                  | 624                         | 100.00              | 2,542,850      | 14,066            | 8.86  |
| AF442957.1                            | 06             | NODE_184_length_865_cov_5966.774882     | 865              | 865                           | 99.653                                          | 3                    | 0                         | 4,439                                       | 5,303                                   | 865                                           | 1                                         | 0                         | 1581                  | 865                         | 100.00              | 2,542,850      | 23,455            | 10.66 |
| AF442957.1                            | 06             | NODE_185_length_44_cov_6167.782609      | 44               | 44                            | 100                                             | 0                    | 0                         | 5,283                                       | 5,326                                   | 1                                             | 44                                        | 7.20E-17                  | 82.4                  | 44                          | 100.00              | 2,542,850      | 16                | 0.14  |
| AF442957.1                            | 06             | NODE_190_length_559_cov_6003.403346     | 559              | 559                           | 99.106                                          | 5                    | 0                         | 3,127                                       | 3,685                                   | 559                                           | 1                                         | 0                         | 1005                  | 559                         | 100.00              | 2,542,850      | 13,721            | 9.65  |
| AF442957.1                            | 06             | NODE_191_length_38_cov_6149.352941      | 38               | 38                            | 100                                             | 0                    | 0                         | 3,665                                       | 3,702                                   | 1                                             | 38                                        | 1.56E-13                  | 71.3                  | 38                          | 100.00              | 2,542,850      | -                 | -     |
| AF442957.1                            | 06             | NODE_204_length_28_cov_5849.000000      | 28               | 28                            | 100                                             | 0                    | 0                         | 3,698                                       | 3,725                                   | 1                                             | 28                                        | 5.64E-08                  | 52.8                  | 28                          | 100.00              | 2,542,850      | 2                 | 0.03  |
| AF442957.1                            | 06             | NODE_220_length_1894_cov_5061.431393    | 1,894            | 1,895                         | 99.367                                          | 9                    | 3                         | 5,587                                       | 7,479                                   | 1                                             | 1,894                                     | 0                         | 3430                  | 1,892                       | 99.89               | 2,542,850      | 50,232            | 10.42 |
| AF442957.1                            | 06             | NODE_231_length_37_cov_6197.937500      | 37               | 37                            | 100                                             | 0                    | 0                         | 5,306                                       | 5,342                                   | 1                                             | 37                                        | 5.60E-13                  | 69.4                  | 37                          | 100.00              | 2,542,850      | -                 | -     |
| AF442957.1                            | 06             | NODE_24_length_35_cov_5824.857143       | 35               | 35                            | 100                                             | 0                    | 0                         | 4,425                                       | 4,459                                   | 1                                             | 35                                        | 7.25E-12                  | 65.8                  | 35                          | 100.00              | 2,542,850      | 1                 | 0.01  |
| AF442957.1                            | 06             | NODE_240_length_216_cov_5638.179487     | 216              | 217                           | 99.078                                          | 0                    | 2                         | 12,946                                      | 13,161                                  | 1                                             | 216                                       | 3.79E-109                 | 388                   | 215                         | 99.54               | 2,542,850      | 3,769             | 6.83  |
| AF442957.1                            | 06             | NODE_248_length_593_cov_5739.346154     | 593              | 593                           | 99.831                                          | 1                    | 0                         | 12,352                                      | 12,944                                  | 1                                             | 593                                       | 0                         | 1090                  | 593                         | 100.00              | 2,542,850      | 13,764            | 9.13  |
| AF442957.1                            | 06             | NODE_259_length_440_cov_4784.124105     | 440              | 441                           | 98.413                                          | 5                    | 2                         | 7,500                                       | 7,939                                   | 1                                             | 440                                       | 0                         | 774                   | 439                         | 99.77               | 2,542,850      | 8,432             | 7.52  |
| AF442957.1                            | 06             | NODE_263_length_143_cov_4829.254098     | 143              | 143                           | 100                                             | 0                    | 0                         | 9,443                                       | 9,585                                   | 143                                           | 1                                         | 6.66E-72                  | 265                   | 143                         | 100.00              | 2,542,850      | 595               | 1.64  |
| AF442957.1                            | 06             | NODE_27_length_28_cov_6139.142857       | 28               | 28                            | 100                                             | 0                    | 0                         | 3,683                                       | 3,710                                   | 28                                            | 1                                         | 5.64E-08                  | 52.8                  | 28                          | 100.00              | 2,542,850      | -                 | -     |
| AF442957.1                            | 06             | NODE_287_length_557_cov_5286.820896     | 557              | 557                           | 99.82                                           | 1                    | 0                         | 371                                         | 927                                     | 557                                           | 1                                         | 0                         | 1024                  | 557                         | 100.00              | 2,542,850      | 11,879            | 8.39  |

| Query Sequence Accession<br><i>qseqid</i> | Assembly ID | Subject Sequence ID/Contig ID<br><i>sseqid</i> | Contig Length | Alignment Length<br><i>length</i> | Percentage of Identical Matches<br><i>percent</i> | Mismatch<br><i>mismatch</i> | Gap Opening<br><i>gapopen</i> | Start of Alignment in Query<br><i>qstart</i> | End of Alignment in Query<br><i>qend</i> | Start of Alignment in Subject<br><i>sstart</i> | End of Alignment in Subject<br><i>send</i> | Expect Value<br><i>evalue</i> | Bit Score<br><i>bitscore</i> | True Alignment Length | Percent Coverage | Total Reads | Reads to Align | RPKM  |
|-------------------------------------------|-------------|------------------------------------------------|---------------|-----------------------------------|---------------------------------------------------|-----------------------------|-------------------------------|----------------------------------------------|------------------------------------------|------------------------------------------------|--------------------------------------------|-------------------------------|------------------------------|-----------------------|------------------|-------------|----------------|-------|
| AF442957.1                                | 06          | NODE_290_length_281_cov_5343.992308            | 281           | 281                               | 100                                               | 0                           | 0                             | 13,163                                       | 13,443                                   | 1                                              | 281                                        | 1.29E-148                     | 520                          | 281                   | 100.00           | 2,542,850   | 5,210          | 7.29  |
| AF442957.1                                | 06          | NODE_34_length_205_cov_5629.619565             | 205           | 205                               | 100                                               | 0                           | 0                             | 9,226                                        | 9,430                                    | 205                                            | 1                                          | 2.28E-106                     | 379                          | 205                   | 100.00           | 2,542,850   | 2,385          | 4.58  |
| AF442957.1                                | 06          | NODE_6_length_8009_cov_4718.277332             | 8,009         | 8,009                             | 99.376                                            | 39                          | 9                             | 2                                            | 8,003                                    | 8,005                                          | 1                                          | 0                             | 14502                        | 8,000                 | 99.89            | 2,542,850   | 281,284        | 13.81 |
| AF442957.1                                | 06          | NODE_70_length_138_cov_5063.931624             | 138           | 138                               | 97.101                                            | 4                           | 0                             | 14,196                                       | 14,333                                   | 138                                            | 1                                          | 1.88E-62                      | 233                          | 138                   | 100.00           | 2,542,850   | 503            | 1.43  |
| AF442957.1                                | 06          | NODE_75_length_252_cov_4186.562771             | 252           | 248                               | 99.597                                            | 1                           | 0                             | 2                                            | 249                                      | 248                                            | 1                                          | 1.32E-128                     | 453                          | 248                   | 98.41            | 2,542,850   | 4,182          | 6.63  |
| AF442957.1                                | 06          | NODE_8_length_992_cov_5570.472709              | 992           | 993                               | 99.698                                            | 2                           | 1                             | 8,005                                        | 8,997                                    | 992                                            | 1                                          | 0                             | 1816                         | 992                   | 100.00           | 2,542,850   | 26,176         | 10.37 |
| AF442957.1                                | 06          | NODE_86_length_1978_cov_5493.501788            | 1,978         | 1,980                             | 99.091                                            | 15                          | 3                             | 1,147                                        | 3,125                                    | 1                                              | 1,978                                      | 0                             | 3554                         | 1,977                 | 99.95            | 2,542,850   | 56,989         | 11.32 |
| AF442957.1                                | 06          | NODE_88_length_35_cov_5638.214286              | 35            | 35                                | 100                                               | 0                           | 0                             | 4,410                                        | 4,444                                    | 1                                              | 35                                         | 7.25E-12                      | 65.8                         | 35                    | 100.00           | 2,542,850   | 1              | 0.01  |
| AF442957.1                                | 06          | NODE_89_length_417_cov_5749.729798             | 417           | 417                               | 100                                               | 0                           | 0                             | 4,014                                        | 4,430                                    | 417                                            | 1                                          | 0                             | 771                          | 417                   | 100.00           | 2,542,850   | 9,154          | 8.63  |
| AF442957.1                                | 06          | NODE_99_length_151_cov_5142.161538             | 151           | 151                               | 98.013                                            | 0                           | 1                             | 3,705                                        | 3,852                                    | 151                                            | 1                                          | 3.10E-70                      | 259                          | 150                   | 99.34            | 2,542,850   | 821            | 2.14  |
| AF442957.1                                | 07          | NODE_1_length_36_cov_7786.133333               | 36            | 36                                | 100                                               | 0                           | 0                             | 4,424                                        | 4,459                                    | 36                                             | 1                                          | 1.93E-12                      | 67.6                         | 36                    | 100.00           | 3,571,772   | 3              | 0.02  |
| AF442957.1                                | 07          | NODE_1_length_511_cov_5531.399582              | 511           | 511                               | 100                                               | 0                           | 0                             | 13,163                                       | 13,673                                   | 1                                              | 511                                        | 0                             | 944                          | 511                   | 100.00           | 3,571,772   | 14,723         | 8.07  |
| AF442957.1                                | 07          | NODE_10_length_2443_cov_5421.632780            | 2,443         | 2,445                             | 99.223                                            | 14                          | 5                             | 5,562                                        | 8,003                                    | 2,443                                          | 1                                          | 0                             | 4405                         | 2,440                 | 99.88            | 3,571,772   | 88,689         | 10.16 |
| AF442957.1                                | 07          | NODE_11_length_483_cov_7096.108225             | 483           | 483                               | 100                                               | 0                           | 0                             | 3,962                                        | 4,444                                    | 1                                              | 483                                        | 0                             | 893                          | 483                   | 100.00           | 3,571,772   | 15,048         | 8.72  |
| AF442957.1                                | 07          | NODE_12_length_3854_cov_6856.873728            | 3,854         | 3,856                             | 99.274                                            | 22                          | 4                             | 1                                            | 3,852                                    | 1                                              | 3,854                                      | 0                             | 6961                         | 3,852                 | 99.95            | 3,571,772   | 154,256        | 11.20 |
| AF442957.1                                | 07          | NODE_13_length_3956_cov_5930.787663            | 3,956         | 3,958                             | 99.293                                            | 22                          | 4                             | 1                                            | 3,954                                    | 1                                              | 3,956                                      | 0                             | 7149                         | 3,954                 | 99.95            | 3,571,772   | 160,870        | 11.38 |
| AF442957.1                                | 07          | NODE_15_length_189_cov_4655.809524             | 189           | 188                               | 99.468                                            | 1                           | 0                             | 14,348                                       | 14,535                                   | 189                                            | 2                                          | 2.86E-95                      | 342                          | 188                   | 99.47            | 3,571,772   | 3,296          | 4.91  |
| AF442957.1                                | 07          | NODE_16_length_678_cov_5889.984779             | 678           | 679                               | 98.675                                            | 8                           | 1                             | 13,671                                       | 14,349                                   | 678                                            | 1                                          | 0                             | 1203                         | 678                   | 100.00           | 3,571,772   | 20,175         | 8.32  |
| AF442957.1                                | 07          | NODE_19_length_7600_cov_6831.448608            | 7,600         | 7,605                             | 99.579                                            | 22                          | 10                            | 5,562                                        | 13,161                                   | 1                                              | 7,600                                      | 0                             | 13858                        | 7,595                 | 99.93            | 3,571,772   | 300,156        | 11.05 |
| AF442957.1                                | 07          | NODE_20_length_5156_cov_6173.207886            | 5,156         | 5,159                             | 99.748                                            | 8                           | 5                             | 8,005                                        | 13,161                                   | 5,156                                          | 1                                          | 0                             | 9450                         | 5,154                 | 99.96            | 3,571,772   | 202,931        | 11.01 |
| AF442957.1                                | 07          | NODE_24_length_1622_cov_6432.490875            | 1,622         | 1,622                             | 99.815                                            | 3                           | 0                             | 3,949                                        | 5,570                                    | 1,622                                          | 1                                          | 0                             | 2979                         | 1,622                 | 100.00           | 3,571,772   | 71,255         | 12.30 |
| AF442957.1                                | 07          | NODE_26_length_1120_cov_7580.522293            | 1,120         | 1,120                             | 99.732                                            | 3                           | 0                             | 4,439                                        | 5,558                                    | 1,120                                          | 1                                          | 0                             | 2052                         | 1,120                 | 100.00           | 3,571,772   | 44,352         | 11.09 |
| AF442957.1                                | 07          | NODE_30_length_517_cov_6321.286290             | 517           | 517                               | 100                                               | 0                           | 0                             | 13,163                                       | 13,679                                   | 1                                              | 517                                        | 0                             | 955                          | 517                   | 100.00           | 3,571,772   | 16,314         | 8.83  |
| AF442957.1                                | 07          | NODE_7_length_877_cov_4968.174171              | 877           | 877                               | 98.86                                             | 9                           | 1                             | 13,659                                       | 14,535                                   | 1                                              | 876                                        | 0                             | 1563                         | 876                   | 99.89            | 3,571,772   | 34,271         | 10.94 |
| AF442957.1                                | 11          | NODE_1_length_8570_cov_3477.689587             | 8,570         | 8,575                             | 99.534                                            | 31                          | 9                             | 5,964                                        | 14,535                                   | 8,570                                          | 2                                          | 0                             | 15605                        | 8,566                 | 99.95            | 3,021,608   | 196,062        | 7.57  |
| AF442957.1                                | 11          | NODE_11_length_262_cov_3015.178423             | 262           | 262                               | 99.618                                            | 1                           | 0                             | 1                                            | 262                                      | 1                                              | 262                                        | 2.05E-136                     | 479                          | 262                   | 100.00           | 3,021,608   | 3,421          | 4.32  |
| AF442957.1                                | 11          | NODE_12_length_189_cov_2721.035714             | 189           | 188                               | 99.468                                            | 1                           | 0                             | 14,348                                       | 14,535                                   | 189                                            | 2                                          | 2.81E-95                      | 342                          | 188                   | 99.47            | 3,021,608   | 1,877          | 3.30  |
| AF442957.1                                | 11          | NODE_18_length_423_cov_3333.383085             | 423           | 422                               | 99.526                                            | 0                           | 2                             | 5,562                                        | 5,981                                    | 1                                              | 422                                        | 0                             | 767                          | 420                   | 99.29            | 3,021,608   | 6,949          | 5.45  |
| AF442957.1                                | 11          | NODE_2_length_5986_cov_3560.874853             | 5,986         | 5,987                             | 99.449                                            | 25                          | 6                             | 1                                            | 5,981                                    | 5,986                                          | 2                                          | 0                             | 10866                        | 5,981                 | 99.92            | 3,021,608   | 147,074        | 8.13  |
| AF442957.1                                | 11          | NODE_23_length_1597_cov_4397.979695            | 1,597         | 1,597                             | 99.812                                            | 3                           | 0                             | 3,962                                        | 5,558                                    | 1,597                                          | 1                                          | 0                             | 2933                         | 1,597                 | 100.00           | 3,021,608   | 36,486         | 7.56  |
| AF442957.1                                | 11          | NODE_24_length_3620_cov_3956.544596            | 3,620         | 3,623                             | 99.448                                            | 16                          | 4                             | 5,964                                        | 9,585                                    | 3,620                                          | 1                                          | 0                             | 6577                         | 3,619                 | 99.97            | 3,021,608   | 78,936         | 7.21  |
| AF442957.1                                | 11          | NODE_4_length_4766_cov_4060.396628             | 4,766         | 4,769                             | 99.602                                            | 14                          | 5                             | 9,583                                        | 14,349                                   | 1                                              | 4,766                                      | 0                             | 8696                         | 4,764                 | 99.96            | 3,021,608   | 105,437        | 7.32  |
| AF442957.1                                | 11          | NODE_7_length_3636_cov_4122.243154             | 3,636         | 3,638                             | 99.258                                            | 21                          | 4                             | 251                                          | 3,884                                    | 1                                              | 3,636                                      | 0                             | 6564                         | 3,634                 | 99.94            | 3,021,608   | 84,137         | 7.65  |
| AF442957.1                                | 12          | NODE_1_length_14538_cov_3786.549397            | 14,538        | 14,544                            | 99.491                                            | 57                          | 15                            | 1                                            | 14,535                                   | 14,537                                         | 2                                          | 0                             | 26432                        | 14,529                | 99.94            | 2,446,844   | 369,807        | 10.39 |
| AF442957.1                                | 12          | NODE_10_length_3855_cov_4361.195618            | 3,855         | 3,856                             | 99.3                                              | 21                          | 4                             | 1                                            | 3,852                                    | 3,854                                          | 1                                          | 0                             | 6966                         | 3,852                 | 99.92            | 2,446,844   | 94,041         | 9.97  |
| AF442957.1                                | 12          | NODE_14_length_36_cov_4941.133333              | 36            | 36                                | 100                                               | 0                           | 0                             | 4,424                                        | 4,459                                    | 1                                              | 36                                         | 1.89E-12                      | 67.6                         | 36                    | 100.00           | 2,446,844   | -              | -     |
| AF442957.1                                | 12          | NODE_17_length_2560_cov_4013.250098            | 2,560         | 2,562                             | 99.141                                            | 17                          | 5                             | 5,562                                        | 8,120                                    | 1                                              | 2,560                                      | 0                             | 4604                         | 2,557                 | 99.88            | 2,446,844   | 56,795         | 9.06  |
| AF442957.1                                | 12          | NODE_21_length_678_cov_3644.980213             | 678           | 679                               | 98.675                                            | 8                           | 1                             | 13,671                                       | 14,349                                   | 1                                              | 678                                        | 0                             | 1203                         | 678                   | 100.00           | 2,446,844   | 12,196         | 7.34  |
| AF442957.1                                | 12          | NODE_24_length_1120_cov_4864.645132            | 1,120         | 1,120                             | 99.732                                            | 3                           | 0                             | 4,439                                        | 5,558                                    | 1,120                                          | 1                                          | 0                             | 2052                         | 1,120                 | 100.00           | 2,446,844   | 27,091         | 9.89  |
| AF442957.1                                | 12          | NODE_3_length_493_cov_4565.942797              | 493           | 493                               | 100                                               | 0                           | 0                             | 3,952                                        | 4,444                                    | 1                                              | 493                                        | 0                             | 911                          | 493                   | 100.00           | 2,446,844   | 9,375          | 7.77  |
| AF442957.1                                | 12          | NODE_5_length_189_cov_2921.744048              | 189           | 188                               | 99.468                                            | 1                           | 0                             | 14,348                                       | 14,535                                   | 1                                              | 188                                        | 2.81E-95                      | 342                          | 188                   | 99.47            | 2,446,844   | 1,949          | 4.24  |
| AF442957.1                                | 12          | NODE_8_length_5543_cov_4490.119884             | 5,543         | 5,546                             | 99.784                                            | 7                           | 5                             | 8,136                                        | 13,679                                   | 1                                              | 5,543                                      | 0                             | 10170                        | 5,541                 | 99.96            | 2,446,844   | 132,408        | 9.76  |

| Query Sequence Accession<br><i>qseqid</i> | Assembly ID | Subject Sequence ID/Contig ID<br><i>sseqid</i> | Contig Length | Alignment Length<br><i>length</i> | Percentage of Identical Matches<br><i>pident</i> | Mismatch<br><i>mismatch</i> | Gap Opening<br><i>gapopen</i> | Start of Alignment in Query<br><i>qstart</i> | End of Alignment in Query<br><i>qend</i> | Start of Alignment in Subject<br><i>sstart</i> | End of Alignment in Subject<br><i>send</i> | Expect Value<br><i>evalue</i> | Bit Score<br><i>bitscore</i> | True Alignment Length | Percent Coverage | Total Reads | Reads to Align | RPKM |
|-------------------------------------------|-------------|------------------------------------------------|---------------|-----------------------------------|--------------------------------------------------|-----------------------------|-------------------------------|----------------------------------------------|------------------------------------------|------------------------------------------------|--------------------------------------------|-------------------------------|------------------------------|-----------------------|------------------|-------------|----------------|------|
| AF442957.1                                | 18          | NODE_1_length_10097_cov_3080.803890            | 10,097        | 10,102                            | 99.555                                           | 34                          | 11                            | 4,439                                        | 14,535                                   | 1                                              | 10,096                                     | 0                             | 18395                        | 10,091                | 99.94            | 2,909,350   | 165,299        | 5.62 |
| AF442957.1                                | 18          | NODE_1_length_14537_cov_2701.439327            | 14,537        | 14,544                            | 99.498                                           | 56                          | 15                            | 1                                            | 14,535                                   | 14,537                                         | 2                                          | 0                             | 26437                        | 14,529                | 99.94            | 2,909,350   | 243,682        | 5.76 |
| AF442957.1                                | 18          | NODE_3_length_36_cov_3457.266667               | 36            | 36                                | 100                                              | 0                           | 0                             | 4,424                                        | 4,459                                    | 36                                             | 1                                          | 1.89E-12                      | 67.6                         | 36                    | 100.00           | 2,909,350   | 1              | 0.01 |
| AF442957.1                                | 18          | NODE_5_length_3966_cov_3056.022307             | 3,966         | 3,968                             | 99.294                                           | 22                          | 4                             | 1                                            | 3,964                                    | 3,966                                          | 1                                          | 0                             | 7167                         | 3,964                 | 99.95            | 2,909,350   | 64,865         | 5.62 |
| AF442957.1                                | 18          | NODE_6_length_501_cov_3241.864583              | 501           | 501                               | 100                                              | 0                           | 0                             | 3,944                                        | 4,444                                    | 501                                            | 1                                          | 0                             | 926                          | 501                   | 100.00           | 2,909,350   | 6,464          | 4.43 |
| AF442957.1                                | LVE         | 10213                                          | 56            | 56                                | 100                                              | 0                           | 0                             | 12,934                                       | 12,989                                   | 1                                              | 56                                         | 3.33E-20                      | 104                          | 56                    | 100.00           | 32,150,000  | -              | -    |
| AF442957.1                                | LVE         | 10287                                          | 56            | 55                                | 100                                              | 0                           | 0                             | 8,005                                        | 8,059                                    | 56                                             | 2                                          | 1.20E-19                      | 102                          | 55                    | 98.21            | 32,150,000  | -              | -    |
| AF442957.1                                | LVE         | 10289                                          | 56            | 56                                | 100                                              | 0                           | 0                             | 8,005                                        | 8,060                                    | 56                                             | 1                                          | 3.33E-20                      | 104                          | 56                    | 100.00           | 32,150,000  | -              | -    |
| AF442957.1                                | LVE         | 45085                                          | 56            | 56                                | 100                                              | 0                           | 0                             | 1,219                                        | 1,274                                    | 56                                             | 1                                          | 3.33E-20                      | 104                          | 56                    | 100.00           | 32,150,000  | -              | -    |
| AF442957.1                                | LVE         | 72417                                          | 56            | 56                                | 100                                              | 0                           | 0                             | 12,031                                       | 12,086                                   | 1                                              | 56                                         | 3.33E-20                      | 104                          | 56                    | 100.00           | 32,150,000  | -              | -    |
| AF442957.1                                | LVE         | 106430                                         | 56            | 56                                | 100                                              | 0                           | 0                             | 251                                          | 306                                      | 1                                              | 56                                         | 3.33E-20                      | 104                          | 56                    | 100.00           | 32,150,000  | -              | -    |
| AF442957.1                                | LVE         | 117166                                         | 56            | 56                                | 100                                              | 0                           | 0                             | 6,222                                        | 6,277                                    | 1                                              | 56                                         | 3.33E-20                      | 104                          | 56                    | 100.00           | 32,150,000  | -              | -    |
| AF442957.1                                | LVE         | 119348                                         | 56            | 56                                | 100                                              | 0                           | 0                             | 7,995                                        | 8,050                                    | 56                                             | 1                                          | 3.33E-20                      | 104                          | 56                    | 100.00           | 32,150,000  | -              | -    |
| AF442957.1                                | LVE         | 128477                                         | 56            | 56                                | 100                                              | 0                           | 0                             | 1,173                                        | 1,228                                    | 56                                             | 1                                          | 3.33E-20                      | 104                          | 56                    | 100.00           | 32,150,000  | -              | -    |
| AF442957.1                                | LVE         | 141675                                         | 56            | 56                                | 100                                              | 0                           | 0                             | 12,889                                       | 12,944                                   | 1                                              | 56                                         | 3.33E-20                      | 104                          | 56                    | 100.00           | 32,150,000  | -              | -    |
| AF442957.1                                | LVE         | 143377                                         | 56            | 55                                | 100                                              | 0                           | 0                             | 8,006                                        | 8,060                                    | 2                                              | 56                                         | 1.20E-19                      | 102                          | 55                    | 98.21            | 32,150,000  | -              | -    |
| AF442957.1                                | LVE         | 144291                                         | 56            | 54                                | 100                                              | 0                           | 0                             | 8,006                                        | 8,059                                    | 1                                              | 54                                         | 4.30E-19                      | 100                          | 54                    | 96.43            | 32,150,000  | -              | -    |
| AF442957.1                                | LVE         | 156545                                         | 56            | 54                                | 100                                              | 0                           | 0                             | 8,006                                        | 8,059                                    | 2                                              | 55                                         | 4.30E-19                      | 100                          | 54                    | 96.43            | 32,150,000  | -              | -    |
| AF442957.1                                | LVE         | 166288                                         | 56            | 56                                | 100                                              | 0                           | 0                             | 3,054                                        | 3,109                                    | 1                                              | 56                                         | 3.33E-20                      | 104                          | 56                    | 100.00           | 32,150,000  | -              | -    |
| AF442957.1                                | LVE         | 355749                                         | 60            | 60                                | 100                                              | 0                           | 0                             | 12,970                                       | 13,029                                   | 60                                             | 1                                          | 1.99E-22                      | 111                          | 60                    | 100.00           | 32,150,000  | -              | -    |
| AF442957.1                                | LVE         | 381347                                         | 60            | 60                                | 98.333                                           | 1                           | 0                             | 8,007                                        | 8,066                                    | 60                                             | 1                                          | 9.25E-21                      | 106                          | 60                    | 100.00           | 32,150,000  | -              | -    |
| AF442957.1                                | LVE         | 390030                                         | 61            | 61                                | 100                                              | 0                           | 0                             | 12,242                                       | 12,302                                   | 1                                              | 61                                         | 5.53E-23                      | 113                          | 61                    | 100.00           | 32,150,000  | -              | -    |
| AF442957.1                                | LVE         | 445956                                         | 63            | 63                                | 100                                              | 0                           | 0                             | 7,987                                        | 8,049                                    | 63                                             | 1                                          | 4.27E-24                      | 117                          | 63                    | 100.00           | 32,150,000  | -              | -    |
| AF442957.1                                | LVE         | 449620                                         | 63            | 63                                | 100                                              | 0                           | 0                             | 54                                           | 116                                      | 63                                             | 1                                          | 4.27E-24                      | 117                          | 63                    | 100.00           | 32,150,000  | -              | -    |
| AF442957.1                                | LVE         | 451504                                         | 63            | 63                                | 98.413                                           | 0                           | 1                             | 7,988                                        | 8,049                                    | 63                                             | 1                                          | 7.15E-22                      | 110                          | 62                    | 98.41            | 32,150,000  | -              | -    |
| AF442957.1                                | LVE         | 453420                                         | 63            | 60                                | 100                                              | 0                           | 0                             | 1                                            | 60                                       | 60                                             | 1                                          | 1.99E-22                      | 111                          | 60                    | 95.24            | 32,150,000  | -              | -    |
| AF442957.1                                | LVE         | 469923                                         | 64            | 64                                | 100                                              | 0                           | 0                             | 7,996                                        | 8,059                                    | 1                                              | 64                                         | 1.19E-24                      | 119                          | 64                    | 100.00           | 32,150,000  | -              | -    |
| AF442957.1                                | LVE         | 471347                                         | 64            | 64                                | 100                                              | 0                           | 0                             | 1,967                                        | 2,030                                    | 64                                             | 1                                          | 1.19E-24                      | 119                          | 64                    | 100.00           | 32,150,000  | -              | -    |
| AF442957.1                                | LVE         | 504986                                         | 65            | 65                                | 100                                              | 0                           | 0                             | 4,994                                        | 5,058                                    | 1                                              | 65                                         | 3.30E-25                      | 121                          | 65                    | 100.00           | 32,150,000  | -              | -    |
| AF442957.1                                | LVE         | 536761                                         | 67            | 67                                | 100                                              | 0                           | 0                             | 252                                          | 318                                      | 67                                             | 1                                          | 2.55E-26                      | 124                          | 67                    | 100.00           | 32,150,000  | -              | -    |
| AF442957.1                                | LVE         | 574552                                         | 70            | 70                                | 98.571                                           | 0                           | 1                             | 12,920                                       | 12,988                                   | 1                                              | 70                                         | 9.19E-26                      | 122                          | 69                    | 98.57            | 32,150,000  | -              | -    |
| AF442957.1                                | LVE         | 575260                                         | 70            | 70                                | 98.571                                           | 1                           | 0                             | 12,919                                       | 12,988                                   | 70                                             | 1                                          | 2.55E-26                      | 124                          | 70                    | 100.00           | 32,150,000  | -              | -    |
| AF442957.1                                | LVE         | 575262                                         | 70            | 70                                | 100                                              | 0                           | 0                             | 12,919                                       | 12,988                                   | 70                                             | 1                                          | 5.49E-28                      | 130                          | 70                    | 100.00           | 32,150,000  | -              | -    |
| AF442957.1                                | LVE         | 582033                                         | 70            | 70                                | 97.143                                           | 1                           | 1                             | 12,920                                       | 12,988                                   | 70                                             | 1                                          | 4.27E-24                      | 117                          | 69                    | 98.57            | 32,150,000  | -              | -    |
| AF442957.1                                | LVE         | 610703                                         | 73            | 73                                | 100                                              | 0                           | 0                             | 8,043                                        | 8,115                                    | 1                                              | 73                                         | 1.18E-29                      | 135                          | 73                    | 100.00           | 32,150,000  | -              | -    |
| AF442957.1                                | LVE         | 631184                                         | 75            | 75                                | 100                                              | 0                           | 0                             | 10,370                                       | 10,444                                   | 1                                              | 75                                         | 9.12E-31                      | 139                          | 75                    | 100.00           | 32,150,000  | -              | -    |
| AF442957.1                                | LVE         | 641870                                         | 76            | 71                                | 100                                              | 0                           | 0                             | 1,976                                        | 2,046                                    | 1                                              | 71                                         | 1.53E-28                      | 132                          | 71                    | 93.42            | 32,150,000  | -              | -    |
| AF442957.1                                | LVE         | 643087                                         | 76            | 76                                | 100                                              | 0                           | 0                             | 1,920                                        | 1,995                                    | 1                                              | 76                                         | 2.54E-31                      | 141                          | 76                    | 100.00           | 32,150,000  | -              | -    |
| AF442957.1                                | LVE         | 643237                                         | 77            | 77                                | 100                                              | 0                           | 0                             | 8,508                                        | 8,584                                    | 77                                             | 1                                          | 7.05E-32                      | 143                          | 77                    | 100.00           | 32,150,000  | -              | -    |
| AF442957.1                                | LVE         | 644083                                         | 77            | 77                                | 100                                              | 0                           | 0                             | 8,452                                        | 8,528                                    | 77                                             | 1                                          | 7.05E-32                      | 143                          | 77                    | 100.00           | 32,150,000  | -              | -    |
| AF442957.1                                | LVE         | 660682                                         | 79            | 79                                | 100                                              | 0                           | 0                             | 6,916                                        | 6,994                                    | 79                                             | 1                                          | 5.45E-33                      | 147                          | 79                    | 100.00           | 32,150,000  | -              | -    |
| AF442957.1                                | LVE         | 661578                                         | 79            | 79                                | 100                                              | 0                           | 0                             | 4,919                                        | 4,997                                    | 79                                             | 1                                          | 5.45E-33                      | 147                          | 79                    | 100.00           | 32,150,000  | -              | -    |

| Query Sequence Accession<br><i>qseqid</i> | Assembly ID | Subject Sequence ID/Contig ID<br><i>sseqid</i> | Contig Length | Alignment Length<br><i>length</i> | Percentage of Identical Matches<br><i>pident</i> | Mismatch<br><i>mismatch</i> | Gap Opening<br><i>gapopen</i> | Start of Alignment in Query<br><i>qstart</i> | End of Alignment in Query<br><i>qend</i> | Start of Alignment in Subject<br><i>sstart</i> | End of Alignment in Subject<br><i>send</i> | Expect Value<br><i>evalue</i> | Bit Score<br><i>bitscore</i> | True Alignment Length | Percent Coverage | Total Reads | Reads to Align | RPKM |
|-------------------------------------------|-------------|------------------------------------------------|---------------|-----------------------------------|--------------------------------------------------|-----------------------------|-------------------------------|----------------------------------------------|------------------------------------------|------------------------------------------------|--------------------------------------------|-------------------------------|------------------------------|-----------------------|------------------|-------------|----------------|------|
| AF442957.1                                | LVE         | 661644                                         | 79            | 79                                | 100                                              | 0                           | 0                             | 10,687                                       | 10,765                                   | 1                                              | 79                                         | 5.45E-33                      | 147                          | 79                    | 100.00           | 32,150,000  | -              | -    |
| AF442957.1                                | LVE         | 662032                                         | 79            | 79                                | 100                                              | 0                           | 0                             | 10,663                                       | 10,741                                   | 79                                             | 1                                          | 5.45E-33                      | 147                          | 79                    | 100.00           | 32,150,000  | -              | -    |
| AF442957.1                                | LVE         | 674517                                         | 81            | 81                                | 100                                              | 0                           | 0                             | 1,941                                        | 2,021                                    | 1                                              | 81                                         | 4.21E-34                      | 150                          | 81                    | 100.00           | 32,150,000  | -              | -    |
| AF442957.1                                | LVE         | 698083                                         | 84            | 84                                | 100                                              | 0                           | 0                             | 12,890                                       | 12,973                                   | 84                                             | 1                                          | 9.06E-36                      | 156                          | 84                    | 100.00           | 32,150,000  | -              | -    |
| AF442957.1                                | LVE         | 701237                                         | 85            | 85                                | 100                                              | 0                           | 0                             | 4,964                                        | 5,048                                    | 85                                             | 1                                          | 2.52E-36                      | 158                          | 85                    | 100.00           | 32,150,000  | -              | -    |
| AF442957.1                                | LVE         | 703765                                         | 85            | 85                                | 98.824                                           | 0                           | 1                             | 12,890                                       | 12,973                                   | 85                                             | 1                                          | 4.21E-34                      | 150                          | 84                    | 98.82            | 32,150,000  | -              | -    |
| AF442957.1                                | LVE         | 710019                                         | 87            | 87                                | 100                                              | 0                           | 0                             | 6,940                                        | 7,026                                    | 87                                             | 1                                          | 1.95E-37                      | 161                          | 87                    | 100.00           | 32,150,000  | -              | -    |
| AF442957.1                                | LVE         | 714321                                         | 87            | 87                                | 100                                              | 0                           | 0                             | 10,711                                       | 10,797                                   | 87                                             | 1                                          | 1.95E-37                      | 161                          | 87                    | 100.00           | 32,150,000  | -              | -    |
| AF442957.1                                | LVE         | 720426                                         | 89            | 89                                | 100                                              | 0                           | 0                             | 8,474                                        | 8,562                                    | 1                                              | 89                                         | 1.50E-38                      | 165                          | 89                    | 100.00           | 32,150,000  | -              | -    |
| AF442957.1                                | LVE         | 725496                                         | 90            | 90                                | 100                                              | 0                           | 0                             | 12,935                                       | 13,024                                   | 90                                             | 1                                          | 4.18E-39                      | 167                          | 90                    | 100.00           | 32,150,000  | -              | -    |
| AF442957.1                                | LVE         | 731888                                         | 91            | 91                                | 100                                              | 0                           | 0                             | 10,334                                       | 10,424                                   | 1                                              | 91                                         | 1.16E-39                      | 169                          | 91                    | 100.00           | 32,150,000  | -              | -    |
| AF442957.1                                | LVE         | 737736                                         | 92            | 92                                | 100                                              | 0                           | 0                             | 8,006                                        | 8,097                                    | 92                                             | 1                                          | 3.23E-40                      | 171                          | 92                    | 100.00           | 32,150,000  | -              | -    |
| AF442957.1                                | LVE         | 746904                                         | 95            | 95                                | 100                                              | 0                           | 0                             | 12,248                                       | 12,342                                   | 95                                             | 1                                          | 6.95E-42                      | 176                          | 95                    | 100.00           | 32,150,000  | -              | -    |
| AF442957.1                                | LVE         | 750730                                         | 96            | 99                                | 92.929                                           | 4                           | 1                             | 1,967                                        | 2,065                                    | 96                                             | 1                                          | 2.54E-31                      | 141                          | 98                    | 102.08           | 32,150,000  | -              | -    |
| AF442957.1                                | LVE         | 751170                                         | 96            | 96                                | 98.958                                           | 1                           | 0                             | 12,934                                       | 13,029                                   | 1                                              | 96                                         | 8.99E-41                      | 172                          | 96                    | 100.00           | 32,150,000  | -              | -    |
| AF442957.1                                | LVE         | 758166                                         | 98            | 98                                | 98.98                                            | 0                           | 1                             | 209                                          | 305                                      | 1                                              | 98                                         | 2.50E-41                      | 174                          | 97                    | 98.98            | 32,150,000  | -              | -    |
| AF442957.1                                | LVE         | 760879                                         | 98            | 98                                | 100                                              | 0                           | 0                             | 208                                          | 305                                      | 1                                              | 98                                         | 1.49E-43                      | 182                          | 98                    | 100.00           | 32,150,000  | -              | -    |
| AF442957.1                                | LVE         | 762546                                         | 99            | 99                                | 100                                              | 0                           | 0                             | 12,032                                       | 12,130                                   | 1                                              | 99                                         | 4.15E-44                      | 183                          | 99                    | 100.00           | 32,150,000  | -              | -    |
| AF442957.1                                | LVE         | 763644                                         | 99            | 100                               | 99                                               | 0                           | 1                             | 207                                          | 306                                      | 1                                              | 99                                         | 1.93E-42                      | 178                          | 99                    | 100.00           | 32,150,000  | -              | -    |
| AF442957.1                                | LVE         | 763756                                         | 99            | 100                               | 99                                               | 0                           | 1                             | 7,960                                        | 8,059                                    | 1                                              | 99                                         | 1.93E-42                      | 178                          | 99                    | 100.00           | 32,150,000  | -              | -    |
| AF442957.1                                | LVE         | 765030                                         | 100           | 101                               | 99.01                                            | 0                           | 1                             | 12,889                                       | 12,989                                   | 1                                              | 100                                        | 5.37E-43                      | 180                          | 100                   | 100.00           | 32,150,000  | -              | -    |
| AF442957.1                                | LVE         | 765770                                         | 100           | 100                               | 99                                               | 0                           | 1                             | 12,032                                       | 12,130                                   | 1                                              | 100                                        | 1.93E-42                      | 178                          | 99                    | 99.00            | 32,150,000  | -              | -    |
| AF442957.1                                | LVE         | 765900                                         | 100           | 100                               | 100                                              | 0                           | 0                             | 1,174                                        | 1,273                                    | 1                                              | 100                                        | 1.16E-44                      | 185                          | 100                   | 100.00           | 32,150,000  | -              | -    |
| AF442957.1                                | LVE         | 766636                                         | 100           | 101                               | 99.01                                            | 0                           | 1                             | 12,031                                       | 12,131                                   | 1                                              | 100                                        | 5.37E-43                      | 180                          | 100                   | 100.00           | 32,150,000  | -              | -    |
| AF442957.1                                | LVE         | 766878                                         | 100           | 100                               | 99                                               | 0                           | 1                             | 7,961                                        | 8,059                                    | 100                                            | 1                                          | 1.93E-42                      | 178                          | 99                    | 99.00            | 32,150,000  | -              | -    |
| AF442957.1                                | LVE         | 768783                                         | 101           | 101                               | 100                                              | 0                           | 0                             | 3,055                                        | 3,155                                    | 1                                              | 101                                        | 3.21E-45                      | 187                          | 101                   | 100.00           | 32,150,000  | -              | -    |
| AF442957.1                                | LVE         | 769443                                         | 101           | 101                               | 96.04                                            | 4                           | 0                             | 14,211                                       | 14,311                                   | 1                                              | 101                                        | 1.50E-38                      | 165                          | 101                   | 100.00           | 32,150,000  | -              | -    |
| AF442957.1                                | LVE         | 769827                                         | 101           | 101                               | 99.01                                            | 0                           | 1                             | 1,174                                        | 1,273                                    | 1                                              | 101                                        | 5.37E-43                      | 180                          | 100                   | 99.01            | 32,150,000  | -              | -    |
| AF442957.1                                | LVE         | 769985                                         | 101           | 101                               | 99.01                                            | 0                           | 1                             | 4,919                                        | 5,018                                    | 101                                            | 1                                          | 5.37E-43                      | 180                          | 100                   | 99.01            | 32,150,000  | -              | -    |
| AF442957.1                                | LVE         | 771847                                         | 101           | 101                               | 99.01                                            | 1                           | 0                             | 6,176                                        | 6,276                                    | 1                                              | 101                                        | 1.49E-43                      | 182                          | 101                   | 100.00           | 32,150,000  | -              | -    |
| AF442957.1                                | LVE         | 771863                                         | 101           | 102                               | 99.02                                            | 0                           | 1                             | 1,173                                        | 1,274                                    | 101                                            | 1                                          | 1.49E-43                      | 182                          | 101                   | 100.00           | 32,150,000  | -              | -    |
| AF442957.1                                | LVE         | 772193                                         | 101           | 101                               | 98.02                                            | 0                           | 1                             | 7,959                                        | 8,059                                    | 1                                              | 99                                         | 2.50E-41                      | 174                          | 100                   | 99.01            | 32,150,000  | -              | -    |
| AF442957.1                                | LVE         | 772779                                         | 102           | 102                               | 99.02                                            | 0                           | 1                             | 3,055                                        | 3,155                                    | 1                                              | 102                                        | 1.49E-43                      | 182                          | 101                   | 99.02            | 32,150,000  | -              | -    |
| AF442957.1                                | LVE         | 773441                                         | 102           | 102                               | 95.098                                           | 4                           | 1                             | 14,211                                       | 14,311                                   | 1                                              | 102                                        | 7.00E-37                      | 159                          | 101                   | 99.02            | 32,150,000  | -              | -    |
| AF442957.1                                | LVE         | 775601                                         | 102           | 103                               | 99.029                                           | 0                           | 1                             | 3,054                                        | 3,156                                    | 1                                              | 102                                        | 4.15E-44                      | 183                          | 102                   | 100.00           | 32,150,000  | -              | -    |
| AF442957.1                                | LVE         | 775847                                         | 102           | 103                               | 99.029                                           | 0                           | 1                             | 7,948                                        | 8,050                                    | 1                                              | 102                                        | 4.15E-44                      | 183                          | 102                   | 100.00           | 32,150,000  | -              | -    |
| AF442957.1                                | LVE         | 775935                                         | 102           | 102                               | 98.039                                           | 1                           | 1                             | 6,176                                        | 6,276                                    | 1                                              | 102                                        | 6.95E-42                      | 176                          | 101                   | 99.02            | 32,150,000  | -              | -    |
| AF442957.1                                | LVE         | 776197                                         | 102           | 103                               | 99.029                                           | 0                           | 1                             | 10,663                                       | 10,765                                   | 1                                              | 102                                        | 4.15E-44                      | 183                          | 102                   | 100.00           | 32,150,000  | -              | -    |
| AF442957.1                                | LVE         | 776345                                         | 102           | 103                               | 98.058                                           | 1                           | 1                             | 6,175                                        | 6,277                                    | 1                                              | 102                                        | 1.93E-42                      | 178                          | 102                   | 100.00           | 32,150,000  | -              | -    |
| AF442957.1                                | LVE         | 777525                                         | 103           | 103                               | 99.029                                           | 1                           | 0                             | 7,995                                        | 8,097                                    | 103                                            | 1                                          | 1.16E-44                      | 185                          | 103                   | 100.00           | 32,150,000  | -              | -    |
| AF442957.1                                | LVE         | 779193                                         | 103           | 103                               | 100                                              | 0                           | 0                             | 6                                            | 108                                      | 1                                              | 103                                        | 2.48E-46                      | 191                          | 103                   | 100.00           | 32,150,000  | -              | -    |
| AF442957.1                                | LVE         | 780037                                         | 103           | 103                               | 99.029                                           | 0                           | 1                             | 12,242                                       | 12,343                                   | 103                                            | 1                                          | 4.15E-44                      | 183                          | 102                   | 99.03            | 32,150,000  | -              | -    |

| Query Sequence Accession<br><i>qseqid</i> | Assembly ID | Subject Sequence ID/Contig ID<br><i>sseqid</i> | Contig Length | Alignment Length<br><i>length</i> | Percentage of Identical Matches<br><i>percent</i> | Mismatch<br><i>mismatch</i> | Gap Opening<br><i>gapopen</i> | Start of Alignment in Query<br><i>qstart</i> | End of Alignment in Query<br><i>qend</i> | Start of Alignment in Subject<br><i>sstart</i> | End of Alignment in Subject<br><i>send</i> | Expect Value<br><i>evalue</i> | Bit Score<br><i>bitscore</i> | True Alignment Length | Percent Coverage | Total Reads | Reads to Align | RPKM |
|-------------------------------------------|-------------|------------------------------------------------|---------------|-----------------------------------|---------------------------------------------------|-----------------------------|-------------------------------|----------------------------------------------|------------------------------------------|------------------------------------------------|--------------------------------------------|-------------------------------|------------------------------|-----------------------|------------------|-------------|----------------|------|
| AF442957.1                                | LVE         | 783381                                         | 104           | 104                               | 99.038                                            | 1                           | 0                             | 8,012                                        | 8,115                                    | 1                                              | 104                                        | 3.21E-45                      | 187                          | 104                   | 100.00           | 32,150,000  | 4              | 0.00 |
| AF442957.1                                | LVE         | 785868                                         | 105           | 105                               | 100                                               | 0                           | 0                             | 7,327                                        | 7,431                                    | 1                                              | 105                                        | 1.92E-47                      | 195                          | 105                   | 100.00           | 32,150,000  | -              | -    |
| AF442957.1                                | LVE         | 789668                                         | 105           | 106                               | 99.057                                            | 0                           | 1                             | 4,943                                        | 5,048                                    | 1                                              | 105                                        | 8.93E-46                      | 189                          | 105                   | 100.00           | 32,150,000  | -              | -    |
| AF442957.1                                | LVE         | 791078                                         | 106           | 106                               | 100                                               | 0                           | 0                             | 12,975                                       | 13,080                                   | 106                                            | 1                                          | 5.34E-48                      | 196                          | 106                   | 100.00           | 32,150,000  | 42             | 0.01 |
| AF442957.1                                | LVE         | 804358                                         | 108           | 108                               | 97.222                                            | 0                           | 3                             | 8,012                                        | 8,116                                    | 1                                              | 108                                        | 5.37E-43                      | 180                          | 105                   | 97.22            | 32,150,000  | 12             | 0.00 |
| AF442957.1                                | LVE         | 812112                                         | 110           | 111                               | 99.099                                            | 0                           | 1                             | 12,970                                       | 13,080                                   | 110                                            | 1                                          | 1.48E-48                      | 198                          | 110                   | 100.00           | 32,150,000  | 188            | 0.05 |
| AF442957.1                                | LVE         | 814685                                         | 110           | 110                               | 99.091                                            | 1                           | 0                             | 209                                          | 318                                      | 110                                            | 1                                          | 1.48E-48                      | 198                          | 110                   | 100.00           | 32,150,000  | 100            | 0.03 |
| AF442957.1                                | LVE         | 818637                                         | 111           | 111                               | 99.099                                            | 1                           | 0                             | 8,452                                        | 8,562                                    | 1                                              | 111                                        | 4.12E-49                      | 200                          | 111                   | 100.00           | 32,150,000  | 166            | 0.05 |
| AF442957.1                                | LVE         | 827385                                         | 111           | 111                               | 100                                               | 0                           | 0                             | 4,676                                        | 4,786                                    | 111                                            | 1                                          | 8.87E-51                      | 206                          | 111                   | 100.00           | 32,150,000  | 156            | 0.04 |
| AF442957.1                                | LVE         | 827411                                         | 111           | 111                               | 98.198                                            | 2                           | 0                             | 7,321                                        | 7,431                                    | 1                                              | 111                                        | 1.92E-47                      | 195                          | 111                   | 100.00           | 32,150,000  | 76             | 0.02 |
| AF442957.1                                | LVE         | 831109                                         | 111           | 111                               | 99.099                                            | 1                           | 0                             | 12,248                                       | 12,358                                   | 111                                            | 1                                          | 4.12E-49                      | 200                          | 111                   | 100.00           | 32,150,000  | 182            | 0.05 |
| AF442957.1                                | LVE         | 837023                                         | 111           | 111                               | 98.198                                            | 2                           | 0                             | 2,499                                        | 2,609                                    | 111                                            | 1                                          | 1.92E-47                      | 195                          | 111                   | 100.00           | 32,150,000  | 132            | 0.04 |
| AF442957.1                                | LVE         | 838339                                         | 111           | 111                               | 99.099                                            | 1                           | 0                             | 6,916                                        | 7,026                                    | 111                                            | 1                                          | 4.12E-49                      | 200                          | 111                   | 100.00           | 32,150,000  | 154            | 0.04 |
| AF442957.1                                | LVE         | 842955                                         | 111           | 111                               | 100                                               | 0                           | 0                             | 3,329                                        | 3,439                                    | 111                                            | 1                                          | 8.87E-51                      | 206                          | 111                   | 100.00           | 32,150,000  | 200            | 0.06 |
| AF442957.1                                | LVE         | 855051                                         | 111           | 108                               | 99.074                                            | 1                           | 0                             | 1                                            | 108                                      | 108                                            | 1                                          | 1.92E-47                      | 195                          | 108                   | 97.30            | 32,150,000  | 136            | 0.04 |
| AF442957.1                                | LVE         | 855111                                         | 111           | 111                               | 99.099                                            | 1                           | 0                             | 6                                            | 116                                      | 111                                            | 1                                          | 4.12E-49                      | 200                          | 111                   | 100.00           | 32,150,000  | 84             | 0.02 |
| AF442957.1                                | LVE         | 865073                                         | 111           | 111                               | 98.198                                            | 2                           | 0                             | 4,531                                        | 4,641                                    | 1                                              | 111                                        | 1.92E-47                      | 195                          | 111                   | 100.00           | 32,150,000  | 34             | 0.01 |
| AF442957.1                                | LVE         | 865075                                         | 111           | 111                               | 99.099                                            | 1                           | 0                             | 4,531                                        | 4,641                                    | 1                                              | 111                                        | 4.12E-49                      | 200                          | 111                   | 100.00           | 32,150,000  | 144            | 0.04 |
| AF442957.1                                | LVE         | 867005                                         | 111           | 111                               | 99.099                                            | 1                           | 0                             | 4,948                                        | 5,058                                    | 111                                            | 1                                          | 4.12E-49                      | 200                          | 111                   | 100.00           | 32,150,000  | 108            | 0.03 |
| AF442957.1                                | LVE         | 877219                                         | 111           | 111                               | 99.099                                            | 1                           | 0                             | 3,329                                        | 3,439                                    | 111                                            | 1                                          | 4.12E-49                      | 200                          | 111                   | 100.00           | 32,150,000  | 28             | 0.01 |
| AF442957.1                                | LVE         | 877939                                         | 111           | 111                               | 99.099                                            | 1                           | 0                             | 4,676                                        | 4,786                                    | 111                                            | 1                                          | 4.12E-49                      | 200                          | 111                   | 100.00           | 32,150,000  | -              | -    |
| AF442957.1                                | LVE         | 878765                                         | 111           | 111                               | 99.099                                            | 1                           | 0                             | 10,334                                       | 10,444                                   | 1                                              | 111                                        | 4.12E-49                      | 200                          | 111                   | 100.00           | 32,150,000  | 142            | 0.04 |
| AF442957.1                                | LVE         | 887331                                         | 111           | 111                               | 99.099                                            | 1                           | 0                             | 2,499                                        | 2,609                                    | 1                                              | 111                                        | 4.12E-49                      | 200                          | 111                   | 100.00           | 32,150,000  | 10             | 0.00 |
| AF442957.1                                | LVE         | 891747                                         | 111           | 111                               | 98.198                                            | 2                           | 0                             | 11,432                                       | 11,542                                   | 1                                              | 111                                        | 1.92E-47                      | 195                          | 111                   | 100.00           | 32,150,000  | 14             | 0.00 |
| AF442957.1                                | LVE         | 897297                                         | 111           | 106                               | 99.057                                            | 1                           | 0                             | 1,941                                        | 2,046                                    | 1                                              | 106                                        | 2.48E-46                      | 191                          | 106                   | 95.50            | 32,150,000  | 152            | 0.04 |
| AF442957.1                                | LVE         | 902593                                         | 111           | 111                               | 100                                               | 0                           | 0                             | 11,432                                       | 11,542                                   | 111                                            | 1                                          | 8.87E-51                      | 206                          | 111                   | 100.00           | 32,150,000  | 164            | 0.05 |
| AF442957.1                                | LVE         | 904683                                         | 111           | 111                               | 99.099                                            | 1                           | 0                             | 10,314                                       | 10,424                                   | 1                                              | 111                                        | 4.12E-49                      | 200                          | 111                   | 100.00           | 32,150,000  | 150            | 0.04 |
| AF442957.1                                | LVE         | 907221                                         | 111           | 111                               | 99.099                                            | 1                           | 0                             | 10,687                                       | 10,797                                   | 1                                              | 111                                        | 4.12E-49                      | 200                          | 111                   | 100.00           | 32,150,000  | 110            | 0.03 |
| AF442957.1                                | LVE         | 909431                                         | 111           | 111                               | 99.099                                            | 1                           | 0                             | 8,474                                        | 8,584                                    | 1                                              | 111                                        | 4.12E-49                      | 200                          | 111                   | 100.00           | 32,150,000  | 112            | 0.03 |
| AF442957.1                                | LVE         | 909531                                         | 111           | 111                               | 99.099                                            | 1                           | 0                             | 1,920                                        | 2,030                                    | 1                                              | 111                                        | 4.12E-49                      | 200                          | 111                   | 100.00           | 32,150,000  | 78             | 0.02 |
| AF442957.1                                | LVE         | 931378                                         | 127           | 127                               | 99.213                                            | 1                           | 0                             | 62                                           | 188                                      | 1                                              | 127                                        | 5.26E-58                      | 230                          | 127                   | 100.00           | 32,150,000  | 524            | 0.13 |
| AF442957.1                                | LVE         | 934092                                         | 130           | 130                               | 100                                               | 0                           | 0                             | 6,972                                        | 7,101                                    | 1                                              | 130                                        | 2.43E-61                      | 241                          | 130                   | 100.00           | 32,150,000  | 240            | 0.06 |
| AF442957.1                                | LVE         | 943219                                         | 144           | 144                               | 99.306                                            | 1                           | 0                             | 4,587                                        | 4,730                                    | 144                                            | 1                                          | 1.87E-67                      | 261                          | 144                   | 100.00           | 32,150,000  | 750            | 0.16 |
| AF442957.1                                | LVE         | 950731                                         | 162           | 162                               | 98.765                                            | 2                           | 0                             | 6,940                                        | 7,101                                    | 162                                            | 1                                          | 8.56E-76                      | 289                          | 162                   | 100.00           | 32,150,000  | 680            | 0.13 |
| AF442957.1                                | LVE         | 1165150                                        | 186           | 186                               | 100                                               | 0                           | 0                             | 11,488                                       | 11,673                                   | 186                                            | 1                                          | 1.80E-92                      | 344                          | 186                   | 100.00           | 32,150,000  | 1,356          | 0.23 |
| AF442957.1                                | LVE         | 1183928                                        | 188           | 188                               | 98.936                                            | 2                           | 0                             | 11,669                                       | 11,856                                   | 1                                              | 188                                        | 3.01E-90                      | 337                          | 188                   | 100.00           | 32,150,000  | 1,362          | 0.23 |
| AF442957.1                                | LVE         | 1322655                                        | 220           | 220                               | 100                                               | 0                           | 0                             | 12,077                                       | 12,296                                   | 1                                              | 220                                        | 2.26E-111                     | 407                          | 220                   | 100.00           | 32,150,000  | 1,864          | 0.26 |
| AF442957.1                                | LVE         | 1330589                                        | 223           | 60                                | 95                                                | 2                           | 1                             | 10,879                                       | 10,937                                   | 61                                             | 2                                          | 7.20E-17                      | 93.5                         | 59                    | 26.46            | 32,150,000  | 16             | 0.01 |
| AF442957.1                                | LVE         | 1357997                                        | 226           | 236                               | 100                                               | 0                           | 0                             | 11,850                                       | 12,085                                   | 236                                            | 1                                          | 2.89E-120                     | 436                          | 236                   | 104.42           | 32,150,000  | 2,060          | 0.27 |
| AF442957.1                                | LVE         | 1367963                                        | 242           | 242                               | 99.587                                            | 1                           | 0                             | 4,732                                        | 4,973                                    | 1                                              | 242                                        | 6.21E-122                     | 442                          | 242                   | 100.00           | 32,150,000  | 2,228          | 0.29 |
| AF442957.1                                | LVE         | 1406702                                        | 279           | 279                               | 100                                               | 0                           | 0                             | 7,047                                        | 7,325                                    | 279                                            | 1                                          | 3.61E-144                     | 516                          | 279                   | 100.00           | 32,150,000  | 2,394          | 0.27 |
| AF442957.1                                | LVE         | 1408634                                        | 282           | 282                               | 98.936                                            | 3                           | 0                             | 3,102                                        | 3,383                                    | 282                                            | 1                                          | 7.81E-141                     | 505                          | 282                   | 100.00           | 32,150,000  | 2,646          | 0.29 |

| Query Sequence Accession<br><i>qseqid</i> | Assembly ID | Subject Sequence ID/Contig ID<br><i>sseqid</i> | Contig Length | Alignment Length<br><i>length</i> | Percentage of Identical Matches<br><i>percent</i> | Mismatch<br><i>mismatch</i> | Gap Opening<br><i>gapopen</i> | Start of Alignment in Query<br><i>qstart</i> | End of Alignment in Query<br><i>qend</i> | Start of Alignment in Subject<br><i>sstart</i> | End of Alignment in Subject<br><i>send</i> | Expect Value<br><i>evalue</i> | Bit Score<br><i>bitscore</i> | True Alignment Length | Percent Coverage | Total Reads | Reads to Align | RPKM |
|-------------------------------------------|-------------|------------------------------------------------|---------------|-----------------------------------|---------------------------------------------------|-----------------------------|-------------------------------|----------------------------------------------|------------------------------------------|------------------------------------------------|--------------------------------------------|-------------------------------|------------------------------|-----------------------|------------------|-------------|----------------|------|
| AF442957.1                                | LVE         | 1412028                                        | 288           | 288                               | 98.611                                            | 4                           | 0                             | 13,978                                       | 14,265                                   | 1                                              | 288                                        | 1.68E-142                     | 510                          | 288                   | 100.00           | 32,150,000  | 2,622          | 0.28 |
| AF442957.1                                | LVE         | 1426808                                        | 328           | 328                               | 99.085                                            | 3                           | 0                             | 10,390                                       | 10,717                                   | 328                                            | 1                                          | 2.09E-166                     | 590                          | 328                   | 100.00           | 32,150,000  | 3,066          | 0.29 |
| AF442957.1                                | LVE         | 1434156                                        | 374           | 375                               | 98.133                                            | 4                           | 3                             | 5,857                                        | 6,229                                    | 374                                            | 1                                          | 0                             | 651                          | 372                   | 99.47            | 32,150,000  | 3,914          | 0.32 |
| AF442957.1                                | LVE         | 1438448                                        | 431           | 431                               | 100                                               | 0                           | 0                             | 8,530                                        | 8,960                                    | 431                                            | 1                                          | 0                             | 797                          | 431                   | 100.00           | 32,150,000  | 4,398          | 0.32 |
| AF442957.1                                | LVE         | 1439078                                        | 444           | 445                               | 99.326                                            | 2                           | 1                             | 8,062                                        | 8,506                                    | 444                                            | 1                                          | 0                             | 804                          | 444                   | 100.00           | 32,150,000  | 4,658          | 0.33 |
| AF442957.1                                | LVE         | 1441824                                        | 543           | 544                               | 98.162                                            | 8                           | 2                             | 2,011                                        | 2,553                                    | 1                                              | 543                                        | 0                             | 948                          | 542                   | 99.82            | 32,150,000  | 5,582          | 0.32 |
| AF442957.1                                | LVE         | 1442014                                        | 554           | 554                               | 99.097                                            | 5                           | 0                             | 2,555                                        | 3,108                                    | 554                                            | 1                                          | 0                             | 996                          | 554                   | 100.00           | 32,150,000  | 5,970          | 0.34 |
| AF442957.1                                | LVE         | 1442428                                        | 577           | 578                               | 98.789                                            | 5                           | 2                             | 7,377                                        | 7,953                                    | 1                                              | 577                                        | 0                             | 1027                         | 576                   | 99.83            | 32,150,000  | 6,604          | 0.36 |
| AF442957.1                                | LVE         | 1442760                                        | 600           | 600                               | 99.833                                            | 1                           | 0                             | 12,344                                       | 12,943                                   | 600                                            | 1                                          | 0                             | 1103                         | 600                   | 100.00           | 32,150,000  | 6,924          | 0.36 |
| AF442957.1                                | LVE         | 1443268                                        | 642           | 279                               | 99.642                                            | 1                           | 0                             | 14,257                                       | 14,535                                   | 1                                              | 279                                        | 1.68E-142                     | 510                          | 279                   | 43.46            | 32,150,000  | 7,136          | 0.80 |
| AF442957.1                                | LVE         | 1443458                                        | 662           | 663                               | 99.698                                            | 0                           | 2                             | 8,965                                        | 9,626                                    | 1                                              | 662                                        | 0                             | 1212                         | 661                   | 99.85            | 32,150,000  | 7,558          | 0.35 |
| AF442957.1                                | LVE         | 1443510                                        | 668           | 668                               | 100                                               | 0                           | 0                             | 9,619                                        | 10,286                                   | 668                                            | 1                                          | 0                             | 1234                         | 668                   | 100.00           | 32,150,000  | 8,190          | 0.38 |
| AF442957.1                                | LVE         | 1444092                                        | 744           | 744                               | 99.866                                            | 1                           | 0                             | 10,743                                       | 11,486                                   | 744                                            | 1                                          | 0                             | 1369                         | 744                   | 100.00           | 32,150,000  | 8,784          | 0.37 |
| AF442957.1                                | LVE         | 1444118                                        | 748           | 748                               | 99.465                                            | 4                           | 0                             | 6,223                                        | 6,970                                    | 1                                              | 748                                        | 0                             | 1360                         | 748                   | 100.00           | 32,150,000  | 8,672          | 0.36 |
| AF442957.1                                | LVE         | 1444180                                        | 754           | 755                               | 99.735                                            | 1                           | 1                             | 1,220                                        | 1,974                                    | 1                                              | 754                                        | 0                             | 1382                         | 754                   | 100.00           | 32,150,000  | 8,356          | 0.34 |
| AF442957.1                                | LVE         | 1444558                                        | 831           | 831                               | 99.88                                             | 1                           | 0                             | 5,004                                        | 5,834                                    | 831                                            | 1                                          | 0                             | 1530                         | 831                   | 100.00           | 32,150,000  | 10,072         | 0.38 |
| AF442957.1                                | LVE         | 1445068                                        | 955           | 957                               | 99.269                                            | 4                           | 3                             | 13,026                                       | 13,981                                   | 955                                            | 1                                          | 0                             | 1725                         | 954                   | 99.90            | 32,150,000  | 11,818         | 0.38 |
| AF442957.1                                | LVE         | 1445096                                        | 964           | 964                               | 99.896                                            | 1                           | 0                             | 264                                          | 1,227                                    | 1                                              | 964                                        | 0                             | 1775                         | 964                   | 100.00           | 32,150,000  | 11,608         | 0.37 |
| AF442957.1                                | LVE         | 1445642                                        | 1,204         | 1,204                             | 99.668                                            | 1                           | 1                             | 3,385                                        | 4,585                                    | 1,204                                          | 1                                          | 0                             | 2198                         | 1,203                 | 99.92            | 32,150,000  | 14,204         | 0.37 |
| AF442957.1                                | LVZ         | 4622                                           | 56            | 55                                | 100                                               | 0                           | 0                             | 8,005                                        | 8,059                                    | 56                                             | 2                                          | 7.25E-20                      | 102                          | 55                    | 98.21            | 24,708,000  | -              | -    |
| AF442957.1                                | LVZ         | 4624                                           | 56            | 56                                | 100                                               | 0                           | 0                             | 8,005                                        | 8,060                                    | 56                                             | 1                                          | 2.02E-20                      | 104                          | 56                    | 100.00           | 24,708,000  | -              | -    |
| AF442957.1                                | LVZ         | 4626                                           | 56            | 55                                | 100                                               | 0                           | 0                             | 8,005                                        | 8,059                                    | 2                                              | 56                                         | 7.25E-20                      | 102                          | 55                    | 98.21            | 24,708,000  | -              | -    |
| AF442957.1                                | LVZ         | 9455                                           | 56            | 55                                | 100                                               | 0                           | 0                             | 14,257                                       | 14,311                                   | 55                                             | 1                                          | 7.25E-20                      | 102                          | 55                    | 98.21            | 24,708,000  | -              | -    |
| AF442957.1                                | LVZ         | 11117                                          | 56            | 56                                | 100                                               | 0                           | 0                             | 12,934                                       | 12,989                                   | 1                                              | 56                                         | 2.02E-20                      | 104                          | 56                    | 100.00           | 24,708,000  | -              | -    |
| AF442957.1                                | LVZ         | 29502                                          | 56            | 56                                | 100                                               | 0                           | 0                             | 1,219                                        | 1,274                                    | 56                                             | 1                                          | 2.02E-20                      | 104                          | 56                    | 100.00           | 24,708,000  | -              | -    |
| AF442957.1                                | LVZ         | 32480                                          | 56            | 56                                | 100                                               | 0                           | 0                             | 4,918                                        | 4,973                                    | 1                                              | 56                                         | 2.02E-20                      | 104                          | 56                    | 100.00           | 24,708,000  | -              | -    |
| AF442957.1                                | LVZ         | 43193                                          | 56            | 56                                | 100                                               | 0                           | 0                             | 12,031                                       | 12,086                                   | 1                                              | 56                                         | 2.02E-20                      | 104                          | 56                    | 100.00           | 24,708,000  | -              | -    |
| AF442957.1                                | LVZ         | 61731                                          | 56            | 56                                | 100                                               | 0                           | 0                             | 251                                          | 306                                      | 56                                             | 1                                          | 2.02E-20                      | 104                          | 56                    | 100.00           | 24,708,000  | -              | -    |
| AF442957.1                                | LVZ         | 67281                                          | 56            | 56                                | 100                                               | 0                           | 0                             | 7,995                                        | 8,050                                    | 56                                             | 1                                          | 2.02E-20                      | 104                          | 56                    | 100.00           | 24,708,000  | -              | -    |
| AF442957.1                                | LVZ         | 79871                                          | 56            | 56                                | 100                                               | 0                           | 0                             | 1,173                                        | 1,228                                    | 56                                             | 1                                          | 2.02E-20                      | 104                          | 56                    | 100.00           | 24,708,000  | -              | -    |
| AF442957.1                                | LVZ         | 85417                                          | 56            | 56                                | 100                                               | 0                           | 0                             | 12,889                                       | 12,944                                   | 1                                              | 56                                         | 2.02E-20                      | 104                          | 56                    | 100.00           | 24,708,000  | -              | -    |
| AF442957.1                                | LVZ         | 91736                                          | 56            | 55                                | 100                                               | 0                           | 0                             | 8,006                                        | 8,060                                    | 2                                              | 56                                         | 7.25E-20                      | 102                          | 55                    | 98.21            | 24,708,000  | -              | -    |
| AF442957.1                                | LVZ         | 97439                                          | 56            | 54                                | 100                                               | 0                           | 0                             | 8,006                                        | 8,059                                    | 2                                              | 55                                         | 2.61E-19                      | 100                          | 54                    | 96.43            | 24,708,000  | -              | -    |
| AF442957.1                                | LVZ         | 107352                                         | 57            | 57                                | 100                                               | 0                           | 0                             | 11,921                                       | 11,977                                   | 1                                              | 57                                         | 5.61E-21                      | 106                          | 57                    | 100.00           | 24,708,000  | -              | -    |
| AF442957.1                                | LVZ         | 127848                                         | 57            | 57                                | 100                                               | 0                           | 0                             | 6,972                                        | 7,028                                    | 57                                             | 1                                          | 5.61E-21                      | 106                          | 57                    | 100.00           | 24,708,000  | -              | -    |
| AF442957.1                                | LVZ         | 167218                                         | 58            | 58                                | 100                                               | 0                           | 0                             | 12,927                                       | 12,984                                   | 58                                             | 1                                          | 1.56E-21                      | 108                          | 58                    | 100.00           | 24,708,000  | -              | -    |
| AF442957.1                                | LVZ         | 194163                                         | 59            | 59                                | 100                                               | 0                           | 0                             | 12,930                                       | 12,988                                   | 1                                              | 59                                         | 4.33E-22                      | 110                          | 59                    | 100.00           | 24,708,000  | -              | -    |
| AF442957.1                                | LVZ         | 197203                                         | 59            | 59                                | 100                                               | 0                           | 0                             | 11,973                                       | 12,031                                   | 59                                             | 1                                          | 4.33E-22                      | 110                          | 59                    | 100.00           | 24,708,000  | -              | -    |
| AF442957.1                                | LVZ         | 199853                                         | 59            | 59                                | 100                                               | 0                           | 0                             | 12,923                                       | 12,981                                   | 1                                              | 59                                         | 4.33E-22                      | 110                          | 59                    | 100.00           | 24,708,000  | -              | -    |
| AF442957.1                                | LVZ         | 203425                                         | 59            | 59                                | 100                                               | 0                           | 0                             | 2,935                                        | 2,993                                    | 59                                             | 1                                          | 4.33E-22                      | 110                          | 59                    | 100.00           | 24,708,000  | -              | -    |
| AF442957.1                                | LVZ         | 212621                                         | 59            | 59                                | 100                                               | 0                           | 0                             | 11,917                                       | 11,975                                   | 1                                              | 59                                         | 4.33E-22                      | 110                          | 59                    | 100.00           | 24,708,000  | -              | -    |
| AF442957.1                                | LVZ         | 219149                                         | 60            | 60                                | 100                                               | 0                           | 0                             | 14,280                                       | 14,339                                   | 60                                             | 1                                          | 1.20E-22                      | 111                          | 60                    | 100.00           | 24,708,000  | -              | -    |

| Query Sequence Accession<br><i>qseqid</i> | Assembly ID | Subject Sequence ID/Contig ID<br><i>sseqid</i> | Contig Length | Alignment Length<br><i>length</i> | Percentage of Identical Matches<br><i>pident</i> | Mismatch<br><i>mismatch</i> | Gap Opening<br><i>gapopen</i> | Start of Alignment in Query<br><i>qstart</i> | End of Alignment in Query<br><i>qend</i> | Start of Alignment in Subject<br><i>sstart</i> | End of Alignment in Subject<br><i>send</i> | Expect Value<br><i>evalue</i> | Bit Score<br><i>bitscore</i> | True Alignment Length | Percent Coverage | Total Reads | Reads to Align | RPKM |
|-------------------------------------------|-------------|------------------------------------------------|---------------|-----------------------------------|--------------------------------------------------|-----------------------------|-------------------------------|----------------------------------------------|------------------------------------------|------------------------------------------------|--------------------------------------------|-------------------------------|------------------------------|-----------------------|------------------|-------------|----------------|------|
| AF442957.1                                | LVZ         | 222449                                         | 60            | 60                                | 96.667                                           | 2                           | 0                             | 4,560                                        | 4,619                                    | 60                                             | 1                                          | 2.61E-19                      | 100                          | 60                    | 100.00           | 24,708,000  | -              | -    |
| AF442957.1                                | LVZ         | 222451                                         | 60            | 60                                | 98.333                                           | 1                           | 0                             | 4,560                                        | 4,619                                    | 60                                             | 1                                          | 5.61E-21                      | 106                          | 60                    | 100.00           | 24,708,000  | -              | -    |
| AF442957.1                                | LVZ         | 232022                                         | 60            | 60                                | 95                                               | 3                           | 0                             | 4,560                                        | 4,619                                    | 1                                              | 60                                         | 1.21E-17                      | 95.3                         | 60                    | 100.00           | 24,708,000  | -              | -    |
| AF442957.1                                | LVZ         | 233870                                         | 60            | 60                                | 96.667                                           | 2                           | 0                             | 4,560                                        | 4,619                                    | 60                                             | 1                                          | 2.61E-19                      | 100                          | 60                    | 100.00           | 24,708,000  | -              | -    |
| AF442957.1                                | LVZ         | 245161                                         | 61            | 61                                | 98.361                                           | 1                           | 0                             | 2,995                                        | 3,055                                    | 61                                             | 1                                          | 1.56E-21                      | 108                          | 61                    | 100.00           | 24,708,000  | -              | -    |
| AF442957.1                                | LVZ         | 257837                                         | 61            | 61                                | 100                                              | 0                           | 0                             | 2,939                                        | 2,999                                    | 1                                              | 61                                         | 3.35E-23                      | 113                          | 61                    | 100.00           | 24,708,000  | -              | -    |
| AF442957.1                                | LVZ         | 258187                                         | 61            | 61                                | 98.361                                           | 1                           | 0                             | 8,006                                        | 8,066                                    | 61                                             | 1                                          | 1.56E-21                      | 108                          | 61                    | 100.00           | 24,708,000  | -              | -    |
| AF442957.1                                | LVZ         | 263131                                         | 62            | 62                                | 100                                              | 0                           | 0                             | 4,524                                        | 4,585                                    | 62                                             | 1                                          | 9.31E-24                      | 115                          | 62                    | 100.00           | 24,708,000  | -              | -    |
| AF442957.1                                | LVZ         | 270773                                         | 62            | 62                                | 100                                              | 0                           | 0                             | 8,530                                        | 8,591                                    | 62                                             | 1                                          | 9.31E-24                      | 115                          | 62                    | 100.00           | 24,708,000  | -              | -    |
| AF442957.1                                | LVZ         | 275852                                         | 62            | 62                                | 100                                              | 0                           | 0                             | 8,474                                        | 8,535                                    | 1                                              | 62                                         | 9.31E-24                      | 115                          | 62                    | 100.00           | 24,708,000  | -              | -    |
| AF442957.1                                | LVZ         | 282661                                         | 63            | 63                                | 100                                              | 0                           | 0                             | 11,965                                       | 12,027                                   | 1                                              | 63                                         | 2.59E-24                      | 117                          | 63                    | 100.00           | 24,708,000  | -              | -    |
| AF442957.1                                | LVZ         | 287501                                         | 63            | 63                                | 98.413                                           | 1                           | 0                             | 3,001                                        | 3,063                                    | 1                                              | 63                                         | 1.20E-22                      | 111                          | 63                    | 100.00           | 24,708,000  | -              | -    |
| AF442957.1                                | LVZ         | 293223                                         | 64            | 64                                | 100                                              | 0                           | 0                             | 7,996                                        | 8,059                                    | 1                                              | 64                                         | 7.20E-25                      | 119                          | 64                    | 100.00           | 24,708,000  | -              | -    |
| AF442957.1                                | LVZ         | 294867                                         | 64            | 64                                | 100                                              | 0                           | 0                             | 1,932                                        | 1,995                                    | 64                                             | 1                                          | 7.20E-25                      | 119                          | 64                    | 100.00           | 24,708,000  | -              | -    |
| AF442957.1                                | LVZ         | 299623                                         | 64            | 64                                | 100                                              | 0                           | 0                             | 11,977                                       | 12,040                                   | 64                                             | 1                                          | 7.20E-25                      | 119                          | 64                    | 100.00           | 24,708,000  | -              | -    |
| AF442957.1                                | LVZ         | 305906                                         | 64            | 64                                | 100                                              | 0                           | 0                             | 1,967                                        | 2,030                                    | 64                                             | 1                                          | 7.20E-25                      | 119                          | 64                    | 100.00           | 24,708,000  | -              | -    |
| AF442957.1                                | LVZ         | 313118                                         | 65            | 65                                | 100                                              | 0                           | 0                             | 11,986                                       | 12,050                                   | 1                                              | 65                                         | 2.00E-25                      | 121                          | 65                    | 100.00           | 24,708,000  | -              | -    |
| AF442957.1                                | LVZ         | 315270                                         | 65            | 65                                | 100                                              | 0                           | 0                             | 12,021                                       | 12,085                                   | 65                                             | 1                                          | 2.00E-25                      | 121                          | 65                    | 100.00           | 24,708,000  | -              | -    |
| AF442957.1                                | LVZ         | 315456                                         | 65            | 65                                | 100                                              | 0                           | 0                             | 12,042                                       | 12,106                                   | 1                                              | 65                                         | 2.00E-25                      | 121                          | 65                    | 100.00           | 24,708,000  | -              | -    |
| AF442957.1                                | LVZ         | 315660                                         | 65            | 65                                | 96.923                                           | 2                           | 0                             | 2,991                                        | 3,055                                    | 65                                             | 1                                          | 4.33E-22                      | 110                          | 65                    | 100.00           | 24,708,000  | -              | -    |
| AF442957.1                                | LVZ         | 317442                                         | 65            | 65                                | 100                                              | 0                           | 0                             | 12,032                                       | 12,096                                   | 65                                             | 1                                          | 2.00E-25                      | 121                          | 65                    | 100.00           | 24,708,000  | -              | -    |
| AF442957.1                                | LVZ         | 319092                                         | 65            | 65                                | 100                                              | 0                           | 0                             | 3,055                                        | 3,119                                    | 65                                             | 1                                          | 2.00E-25                      | 121                          | 65                    | 100.00           | 24,708,000  | -              | -    |
| AF442957.1                                | LVZ         | 331952                                         | 67            | 67                                | 100                                              | 0                           | 0                             | 1,920                                        | 1,986                                    | 1                                              | 67                                         | 1.55E-26                      | 124                          | 67                    | 100.00           | 24,708,000  | -              | -    |
| AF442957.1                                | LVZ         | 333510                                         | 67            | 67                                | 98.507                                           | 1                           | 0                             | 4,548                                        | 4,614                                    | 1                                              | 67                                         | 7.20E-25                      | 119                          | 67                    | 100.00           | 24,708,000  | -              | -    |
| AF442957.1                                | LVZ         | 335838                                         | 67            | 67                                | 100                                              | 0                           | 0                             | 1,976                                        | 2,042                                    | 1                                              | 67                                         | 1.55E-26                      | 124                          | 67                    | 100.00           | 24,708,000  | -              | -    |
| AF442957.1                                | LVZ         | 337322                                         | 67            | 68                                | 98.529                                           | 0                           | 1                             | 239                                          | 306                                      | 1                                              | 67                                         | 7.20E-25                      | 119                          | 67                    | 100.00           | 24,708,000  | -              | -    |
| AF442957.1                                | LVZ         | 340024                                         | 67            | 67                                | 98.507                                           | 1                           | 0                             | 4,604                                        | 4,670                                    | 67                                             | 1                                          | 7.20E-25                      | 119                          | 67                    | 100.00           | 24,708,000  | -              | -    |
| AF442957.1                                | LVZ         | 346908                                         | 68            | 68                                | 100                                              | 0                           | 0                             | 12,910                                       | 12,977                                   | 68                                             | 1                                          | 4.30E-27                      | 126                          | 68                    | 100.00           | 24,708,000  | -              | -    |
| AF442957.1                                | LVZ         | 353153                                         | 69            | 69                                | 100                                              | 0                           | 0                             | 8,460                                        | 8,528                                    | 69                                             | 1                                          | 1.20E-27                      | 128                          | 69                    | 100.00           | 24,708,000  | -              | -    |
| AF442957.1                                | LVZ         | 358903                                         | 69            | 69                                | 100                                              | 0                           | 0                             | 8,516                                        | 8,584                                    | 1                                              | 69                                         | 1.20E-27                      | 128                          | 69                    | 100.00           | 24,708,000  | -              | -    |
| AF442957.1                                | LVZ         | 361274                                         | 70            | 70                                | 100                                              | 0                           | 0                             | 4,509                                        | 4,578                                    | 1                                              | 70                                         | 3.33E-28                      | 130                          | 70                    | 100.00           | 24,708,000  | -              | -    |
| AF442957.1                                | LVZ         | 361290                                         | 70            | 70                                | 100                                              | 0                           | 0                             | 7,349                                        | 7,418                                    | 1                                              | 70                                         | 3.33E-28                      | 130                          | 70                    | 100.00           | 24,708,000  | -              | -    |
| AF442957.1                                | LVZ         | 361292                                         | 70            | 70                                | 100                                              | 0                           | 0                             | 7,364                                        | 7,433                                    | 70                                             | 1                                          | 3.33E-28                      | 130                          | 70                    | 100.00           | 24,708,000  | -              | -    |
| AF442957.1                                | LVZ         | 369036                                         | 71            | 71                                | 100                                              | 0                           | 0                             | 1,174                                        | 1,244                                    | 1                                              | 71                                         | 9.25E-29                      | 132                          | 71                    | 100.00           | 24,708,000  | -              | -    |
| AF442957.1                                | LVZ         | 375948                                         | 72            | 72                                | 100                                              | 0                           | 0                             | 6,923                                        | 6,994                                    | 1                                              | 72                                         | 2.57E-29                      | 134                          | 72                    | 100.00           | 24,708,000  | -              | -    |
| AF442957.1                                | LVZ         | 379292                                         | 72            | 72                                | 98.611                                           | 1                           | 0                             | 4,587                                        | 4,658                                    | 72                                             | 1                                          | 1.20E-27                      | 128                          | 72                    | 100.00           | 24,708,000  | -              | -    |
| AF442957.1                                | LVZ         | 380366                                         | 72            | 72                                | 100                                              | 0                           | 0                             | 252                                          | 323                                      | 72                                             | 1                                          | 2.57E-29                      | 134                          | 72                    | 100.00           | 24,708,000  | -              | -    |
| AF442957.1                                | LVZ         | 381060                                         | 72            | 72                                | 100                                              | 0                           | 0                             | 4,531                                        | 4,602                                    | 1                                              | 72                                         | 2.57E-29                      | 134                          | 72                    | 100.00           | 24,708,000  | -              | -    |
| AF442957.1                                | LVZ         | 381589                                         | 72            | 72                                | 100                                              | 0                           | 0                             | 11,041                                       | 11,112                                   | 1                                              | 72                                         | 2.57E-29                      | 134                          | 72                    | 100.00           | 24,708,000  | -              | -    |
| AF442957.1                                | LVZ         | 383660                                         | 73            | 73                                | 100                                              | 0                           | 0                             | 12,966                                       | 13,038                                   | 1                                              | 73                                         | 7.15E-30                      | 135                          | 73                    | 100.00           | 24,708,000  | -              | -    |
| AF442957.1                                | LVZ         | 383820                                         | 73            | 73                                | 100                                              | 0                           | 0                             | 11,002                                       | 11,074                                   | 73                                             | 1                                          | 7.15E-30                      | 135                          | 73                    | 100.00           | 24,708,000  | -              | -    |
| AF442957.1                                | LVZ         | 388268                                         | 73            | 73                                | 100                                              | 0                           | 0                             | 11,058                                       | 11,130                                   | 73                                             | 1                                          | 7.15E-30                      | 135                          | 73                    | 100.00           | 24,708,000  | -              | -    |



| Query Sequence Accession<br><i>qseqid</i> | Assembly ID | Subject Sequence ID/Contig ID<br><i>sseqid</i> | Contig Length | Alignment Length<br><i>length</i> | Percentage of Identical Matches<br><i>percent</i> | Mismatch<br><i>mismatch</i> | Gap Opening<br><i>gapopen</i> | Start of Alignment in Query<br><i>qstart</i> | End of Alignment in Query<br><i>qend</i> | Start of Alignment in Subject<br><i>sstart</i> | End of Alignment in Subject<br><i>send</i> | Expect Value<br><i>evalue</i> | Bit Score<br><i>bitscore</i> | True Alignment Length | Percent Coverage | Total Reads | Reads to Align | RPKM |
|-------------------------------------------|-------------|------------------------------------------------|---------------|-----------------------------------|---------------------------------------------------|-----------------------------|-------------------------------|----------------------------------------------|------------------------------------------|------------------------------------------------|--------------------------------------------|-------------------------------|------------------------------|-----------------------|------------------|-------------|----------------|------|
| AF442957.1                                | LVZ         | 398445                                         | 75            | 75                                | 98.667                                            | 0                           | 1                             | 12,032                                       | 12,105                                   | 75                                             | 1                                          | 9.25E-29                      | 132                          | 74                    | 98.67            | 24,708,000  | -              | -    |
| AF442957.1                                | LVZ         | 400317                                         | 75            | 75                                | 100                                               | 0                           | 0                             | 12,890                                       | 12,964                                   | 1                                              | 75                                         | 5.53E-31                      | 139                          | 75                    | 100.00           | 24,708,000  | -              | -    |
| AF442957.1                                | LVZ         | 401477                                         | 75            | 75                                | 100                                               | 0                           | 0                             | 11,945                                       | 12,019                                   | 1                                              | 75                                         | 5.53E-31                      | 139                          | 75                    | 100.00           | 24,708,000  | -              | -    |
| AF442957.1                                | LVZ         | 405506                                         | 76            | 76                                | 100                                               | 0                           | 0                             | 11,020                                       | 11,095                                   | 76                                             | 1                                          | 1.54E-31                      | 141                          | 76                    | 100.00           | 24,708,000  | -              | -    |
| AF442957.1                                | LVZ         | 407905                                         | 77            | 77                                | 100                                               | 0                           | 0                             | 11,923                                       | 11,999                                   | 77                                             | 1                                          | 4.27E-32                      | 143                          | 77                    | 100.00           | 24,708,000  | -              | -    |
| AF442957.1                                | LVZ         | 409919                                         | 77            | 77                                | 98.701                                            | 1                           | 0                             | 4,565                                        | 4,641                                    | 1                                              | 77                                         | 1.99E-30                      | 137                          | 77                    | 100.00           | 24,708,000  | -              | -    |
| AF442957.1                                | LVZ         | 412109                                         | 77            | 77                                | 100                                               | 0                           | 0                             | 7,327                                        | 7,403                                    | 1                                              | 77                                         | 4.27E-32                      | 143                          | 77                    | 100.00           | 24,708,000  | -              | -    |
| AF442957.1                                | LVZ         | 413227                                         | 78            | 78                                | 100                                               | 0                           | 0                             | 14,257                                       | 14,334                                   | 78                                             | 1                                          | 1.19E-32                      | 145                          | 78                    | 100.00           | 24,708,000  | -              | -    |
| AF442957.1                                | LVZ         | 424819                                         | 80            | 80                                | 100                                               | 0                           | 0                             | 11,996                                       | 12,075                                   | 80                                             | 1                                          | 9.18E-34                      | 148                          | 80                    | 100.00           | 24,708,000  | -              | -    |
| AF442957.1                                | LVZ         | 428059                                         | 81            | 81                                | 100                                               | 0                           | 0                             | 1,941                                        | 2,021                                    | 1                                              | 81                                         | 2.55E-34                      | 150                          | 81                    | 100.00           | 24,708,000  | -              | -    |
| AF442957.1                                | LVZ         | 428171                                         | 81            | 81                                | 98.765                                            | 1                           | 0                             | 7,379                                        | 7,459                                    | 81                                             | 1                                          | 1.19E-32                      | 145                          | 81                    | 100.00           | 24,708,000  | -              | -    |
| AF442957.1                                | LVZ         | 428173                                         | 81            | 81                                | 97.531                                            | 2                           | 0                             | 7,379                                        | 7,459                                    | 81                                             | 1                                          | 5.53E-31                      | 139                          | 81                    | 100.00           | 24,708,000  | -              | -    |
| AF442957.1                                | LVZ         | 428219                                         | 81            | 81                                | 100                                               | 0                           | 0                             | 7,379                                        | 7,459                                    | 1                                              | 81                                         | 2.55E-34                      | 150                          | 81                    | 100.00           | 24,708,000  | -              | -    |
| AF442957.1                                | LVZ         | 428655                                         | 81            | 81                                | 98.765                                            | 1                           | 0                             | 7,379                                        | 7,459                                    | 1                                              | 81                                         | 1.19E-32                      | 145                          | 81                    | 100.00           | 24,708,000  | -              | -    |
| AF442957.1                                | LVZ         | 433790                                         | 82            | 82                                | 100                                               | 0                           | 0                             | 269                                          | 350                                      | 1                                              | 82                                         | 7.10E-35                      | 152                          | 82                    | 100.00           | 24,708,000  | -              | -    |
| AF442957.1                                | LVZ         | 436774                                         | 83            | 83                                | 100                                               | 0                           | 0                             | 11,889                                       | 11,971                                   | 83                                             | 1                                          | 1.97E-35                      | 154                          | 83                    | 100.00           | 24,708,000  | -              | -    |
| AF442957.1                                | LVZ         | 440168                                         | 84            | 84                                | 100                                               | 0                           | 0                             | 1,190                                        | 1,273                                    | 84                                             | 1                                          | 5.49E-36                      | 156                          | 84                    | 100.00           | 24,708,000  | -              | -    |
| AF442957.1                                | LVZ         | 444332                                         | 85            | 85                                | 98.824                                            | 1                           | 0                             | 7,349                                        | 7,433                                    | 1                                              | 85                                         | 7.10E-35                      | 152                          | 85                    | 100.00           | 24,708,000  | -              | -    |
| AF442957.1                                | LVZ         | 444774                                         | 85            | 85                                | 98.824                                            | 1                           | 0                             | 7,405                                        | 7,489                                    | 85                                             | 1                                          | 7.10E-35                      | 152                          | 85                    | 100.00           | 24,708,000  | -              | -    |
| AF442957.1                                | LVZ         | 445614                                         | 85            | 85                                | 100                                               | 0                           | 0                             | 7,405                                        | 7,489                                    | 85                                             | 1                                          | 1.53E-36                      | 158                          | 85                    | 100.00           | 24,708,000  | -              | -    |
| AF442957.1                                | LVZ         | 447458                                         | 86            | 86                                | 100                                               | 0                           | 0                             | 12,935                                       | 13,020                                   | 86                                             | 1                                          | 4.24E-37                      | 159                          | 86                    | 100.00           | 24,708,000  | -              | -    |
| AF442957.1                                | LVZ         | 450880                                         | 87            | 87                                | 100                                               | 0                           | 0                             | 6,940                                        | 7,026                                    | 87                                             | 1                                          | 1.18E-37                      | 161                          | 87                    | 100.00           | 24,708,000  | -              | -    |
| AF442957.1                                | LVZ         | 453622                                         | 87            | 88                                | 98.864                                            | 0                           | 1                             | 207                                          | 294                                      | 1                                              | 87                                         | 5.49E-36                      | 156                          | 87                    | 100.00           | 24,708,000  | -              | -    |
| AF442957.1                                | LVZ         | 460129                                         | 89            | 89                                | 100                                               | 0                           | 0                             | 7,961                                        | 8,049                                    | 89                                             | 1                                          | 9.12E-39                      | 165                          | 89                    | 100.00           | 24,708,000  | -              | -    |
| AF442957.1                                | LVZ         | 463350                                         | 90            | 90                                | 100                                               | 0                           | 0                             | 8,481                                        | 8,570                                    | 90                                             | 1                                          | 2.54E-39                      | 167                          | 90                    | 100.00           | 24,708,000  | -              | -    |
| AF442957.1                                | LVZ         | 463472                                         | 91            | 91                                | 100                                               | 0                           | 0                             | 3,065                                        | 3,155                                    | 1                                              | 91                                         | 7.05E-40                      | 169                          | 91                    | 100.00           | 24,708,000  | -              | -    |
| AF442957.1                                | LVZ         | 464976                                         | 91            | 91                                | 98.901                                            | 1                           | 0                             | 11,996                                       | 12,086                                   | 91                                             | 1                                          | 3.28E-38                      | 163                          | 91                    | 100.00           | 24,708,000  | -              | -    |
| AF442957.1                                | LVZ         | 466204                                         | 91            | 91                                | 100                                               | 0                           | 0                             | 215                                          | 305                                      | 1                                              | 91                                         | 7.05E-40                      | 169                          | 91                    | 100.00           | 24,708,000  | -              | -    |
| AF442957.1                                | LVZ         | 474330                                         | 94            | 94                                | 100                                               | 0                           | 0                             | 1,134                                        | 1,227                                    | 1                                              | 94                                         | 1.52E-41                      | 174                          | 94                    | 100.00           | 24,708,000  | -              | -    |
| AF442957.1                                | LVZ         | 478009                                         | 96            | 99                                | 92.929                                            | 4                           | 1                             | 1,967                                        | 2,065                                    | 96                                             | 1                                          | 1.54E-31                      | 141                          | 98                    | 102.08           | 24,708,000  | -              | -    |
| AF442957.1                                | LVZ         | 478179                                         | 96            | 96                                | 100                                               | 0                           | 0                             | 4,468                                        | 4,563                                    | 1                                              | 96                                         | 1.17E-42                      | 178                          | 96                    | 100.00           | 24,708,000  | -              | -    |
| AF442957.1                                | LVZ         | 478929                                         | 96            | 96                                | 98.958                                            | 1                           | 0                             | 6,182                                        | 6,277                                    | 96                                             | 1                                          | 5.45E-41                      | 172                          | 96                    | 100.00           | 24,708,000  | -              | -    |
| AF442957.1                                | LVZ         | 486279                                         | 99            | 99                                | 98.99                                             | 0                           | 1                             | 7,961                                        | 8,058                                    | 99                                             | 1                                          | 4.21E-42                      | 176                          | 98                    | 98.99            | 24,708,000  | -              | -    |
| AF442957.1                                | LVZ         | 486537                                         | 99            | 99                                | 98.99                                             | 0                           | 1                             | 208                                          | 305                                      | 1                                              | 99                                         | 4.21E-42                      | 176                          | 98                    | 98.99            | 24,708,000  | -              | -    |
| AF442957.1                                | LVZ         | 487393                                         | 99            | 100                               | 99                                                | 0                           | 1                             | 7,960                                        | 8,059                                    | 99                                             | 1                                          | 1.17E-42                      | 178                          | 99                    | 100.00           | 24,708,000  | -              | -    |
| AF442957.1                                | LVZ         | 487687                                         | 100           | 100                               | 95                                                | 4                           | 1                             | 14,212                                       | 14,310                                   | 1                                              | 100                                        | 5.49E-36                      | 156                          | 99                    | 99.00            | 24,708,000  | -              | -    |
| AF442957.1                                | LVZ         | 487731                                         | 100           | 101                               | 99.01                                             | 0                           | 1                             | 12,889                                       | 12,989                                   | 1                                              | 100                                        | 3.26E-43                      | 180                          | 100                   | 100.00           | 24,708,000  | -              | -    |
| AF442957.1                                | LVZ         | 488151                                         | 100           | 100                               | 99                                                | 0                           | 1                             | 12,890                                       | 12,988                                   | 1                                              | 100                                        | 1.17E-42                      | 178                          | 99                    | 99.00            | 24,708,000  | -              | -    |
| AF442957.1                                | LVZ         | 488295                                         | 100           | 100                               | 100                                               | 0                           | 0                             | 4,919                                        | 5,018                                    | 100                                            | 1                                          | 7.00E-45                      | 185                          | 100                   | 100.00           | 24,708,000  | -              | -    |
| AF442957.1                                | LVZ         | 488969                                         | 100           | 101                               | 99.01                                             | 0                           | 1                             | 12,031                                       | 12,131                                   | 1                                              | 100                                        | 3.26E-43                      | 180                          | 100                   | 100.00           | 24,708,000  | -              | -    |
| AF442957.1                                | LVZ         | 490002                                         | 101           | 101                               | 96.04                                             | 4                           | 0                             | 14,211                                       | 14,311                                   | 101                                            | 1                                          | 9.12E-39                      | 165                          | 101                   | 100.00           | 24,708,000  | -              | -    |
| AF442957.1                                | LVZ         | 490140                                         | 101           | 101                               | 94.059                                            | 4                           | 1                             | 14,212                                       | 14,310                                   | 1                                              | 101                                        | 7.10E-35                      | 152                          | 100                   | 99.01            | 24,708,000  | -              | -    |

| Query Sequence Accession<br><i>qseqid</i> | Assembly ID | Subject Sequence ID/Contig ID<br><i>sseqid</i> | Contig Length | Alignment Length<br><i>length</i> | Percentage of Identical Matches<br><i>percent</i> | Mismatch<br><i>mismatch</i> | Gap Opening<br><i>gapopen</i> | Start of Alignment in Query<br><i>qstart</i> | End of Alignment in Query<br><i>qend</i> | Start of Alignment in Subject<br><i>sstart</i> | End of Alignment in Subject<br><i>send</i> | Expect Value<br><i>evalue</i> | Bit Score<br><i>bitscore</i> | True Alignment Length | Percent Coverage | Total Reads | Reads to Align | RPKM |
|-------------------------------------------|-------------|------------------------------------------------|---------------|-----------------------------------|---------------------------------------------------|-----------------------------|-------------------------------|----------------------------------------------|------------------------------------------|------------------------------------------------|--------------------------------------------|-------------------------------|------------------------------|-----------------------|------------------|-------------|----------------|------|
| AF442957.1                                | LVZ         | 490470                                         | 101           | 101                               | 99.01                                             | 0                           | 1                             | 4,919                                        | 5,018                                    | 1                                              | 101                                        | 3.26E-43                      | 180                          | 100                   | 99.01            | 24,708,000  | -              | -    |
| AF442957.1                                | LVZ         | 490984                                         | 101           | 102                               | 99.02                                             | 0                           | 1                             | 4,918                                        | 5,019                                    | 101                                            | 1                                          | 9.05E-44                      | 182                          | 101                   | 100.00           | 24,708,000  | -              | -    |
| AF442957.1                                | LVZ         | 491844                                         | 101           | 101                               | 99.01                                             | 1                           | 0                             | 3,009                                        | 3,109                                    | 101                                            | 1                                          | 9.05E-44                      | 182                          | 101                   | 100.00           | 24,708,000  | -              | -    |
| AF442957.1                                | LVZ         | 491882                                         | 101           | 101                               | 99.01                                             | 0                           | 1                             | 7,950                                        | 8,049                                    | 1                                              | 101                                        | 3.26E-43                      | 180                          | 100                   | 99.01            | 24,708,000  | -              | -    |
| AF442957.1                                | LVZ         | 491928                                         | 101           | 101                               | 99.01                                             | 1                           | 0                             | 2,945                                        | 3,045                                    | 1                                              | 101                                        | 9.05E-44                      | 182                          | 101                   | 100.00           | 24,708,000  | -              | -    |
| AF442957.1                                | LVZ         | 492192                                         | 101           | 101                               | 99.01                                             | 0                           | 1                             | 1,174                                        | 1,273                                    | 1                                              | 101                                        | 3.26E-43                      | 180                          | 100                   | 99.01            | 24,708,000  | -              | -    |
| AF442957.1                                | LVZ         | 492196                                         | 101           | 102                               | 99.02                                             | 0                           | 1                             | 1,173                                        | 1,274                                    | 101                                            | 1                                          | 9.05E-44                      | 182                          | 101                   | 100.00           | 24,708,000  | -              | -    |
| AF442957.1                                | LVZ         | 492644                                         | 102           | 102                               | 99.02                                             | 0                           | 1                             | 3,055                                        | 3,155                                    | 1                                              | 102                                        | 9.05E-44                      | 182                          | 101                   | 99.02            | 24,708,000  | -              | -    |
| AF442957.1                                | LVZ         | 494678                                         | 102           | 103                               | 98.058                                            | 1                           | 1                             | 6,175                                        | 6,277                                    | 1                                              | 102                                        | 1.17E-42                      | 178                          | 102                   | 100.00           | 24,708,000  | -              | -    |
| AF442957.1                                | LVZ         | 494742                                         | 102           | 103                               | 99.029                                            | 0                           | 1                             | 7,948                                        | 8,050                                    | 1                                              | 102                                        | 2.52E-44                      | 183                          | 102                   | 100.00           | 24,708,000  | -              | -    |
| AF442957.1                                | LVZ         | 495018                                         | 102           | 103                               | 99.029                                            | 0                           | 1                             | 10,663                                       | 10,765                                   | 1                                              | 102                                        | 2.52E-44                      | 183                          | 102                   | 100.00           | 24,708,000  | -              | -    |
| AF442957.1                                | LVZ         | 496636                                         | 103           | 79                                | 98.734                                            | 0                           | 1                             | 1                                            | 79                                       | 78                                             | 1                                          | 5.53E-31                      | 139                          | 78                    | 75.73            | 24,708,000  | -              | -    |
| AF442957.1                                | LVZ         | 497902                                         | 103           | 103                               | 100                                               | 0                           | 0                             | 10,663                                       | 10,765                                   | 1                                              | 103                                        | 1.50E-46                      | 191                          | 103                   | 100.00           | 24,708,000  | -              | -    |
| AF442957.1                                | LVZ         | 498648                                         | 104           | 104                               | 100                                               | 0                           | 0                             | 12,221                                       | 12,324                                   | 1                                              | 104                                        | 4.18E-47                      | 193                          | 104                   | 100.00           | 24,708,000  | -              | -    |
| AF442957.1                                | LVZ         | 499914                                         | 104           | 104                               | 99.038                                            | 1                           | 0                             | 8,012                                        | 8,115                                    | 1                                              | 104                                        | 1.95E-45                      | 187                          | 104                   | 100.00           | 24,708,000  | -              | -    |
| AF442957.1                                | LVZ         | 500746                                         | 104           | 104                               | 99.038                                            | 1                           | 0                             | 6,126                                        | 6,229                                    | 1                                              | 104                                        | 1.95E-45                      | 187                          | 104                   | 100.00           | 24,708,000  | 2              | 0.00 |
| AF442957.1                                | LVZ         | 501024                                         | 104           | 79                                | 100                                               | 0                           | 0                             | 1                                            | 79                                       | 26                                             | 104                                        | 3.30E-33                      | 147                          | 79                    | 75.96            | 24,708,000  | -              | -    |
| AF442957.1                                | LVZ         | 502193                                         | 105           | 105                               | 100                                               | 0                           | 0                             | 2,945                                        | 3,049                                    | 1                                              | 105                                        | 1.16E-47                      | 195                          | 105                   | 100.00           | 24,708,000  | -              | -    |
| AF442957.1                                | LVZ         | 503133                                         | 105           | 106                               | 99.057                                            | 0                           | 1                             | 6,923                                        | 7,028                                    | 105                                            | 1                                          | 5.41E-46                      | 189                          | 105                   | 100.00           | 24,708,000  | -              | -    |
| AF442957.1                                | LVZ         | 505149                                         | 106           | 106                               | 98.113                                            | 2                           | 0                             | 4,509                                        | 4,614                                    | 106                                            | 1                                          | 7.00E-45                      | 185                          | 106                   | 100.00           | 24,708,000  | -              | -    |
| AF442957.1                                | LVZ         | 506353                                         | 106           | 106                               | 98.113                                            | 2                           | 0                             | 4,565                                        | 4,670                                    | 106                                            | 1                                          | 7.00E-45                      | 185                          | 106                   | 100.00           | 24,708,000  | -              | -    |
| AF442957.1                                | LVZ         | 509154                                         | 107           | 110                               | 97.273                                            | 0                           | 1                             | 3,944                                        | 4,053                                    | 1                                              | 107                                        | 2.52E-44                      | 183                          | 109                   | 101.87           | 24,708,000  | 4              | 0.00 |
| AF442957.1                                | LVZ         | 513773                                         | 108           | 108                               | 97.222                                            | 0                           | 3                             | 8,012                                        | 8,116                                    | 1                                              | 108                                        | 3.26E-43                      | 180                          | 105                   | 97.22            | 24,708,000  | 12             | 0.00 |
| AF442957.1                                | LVZ         | 517337                                         | 109           | 109                               | 99.083                                            | 1                           | 0                             | 7,950                                        | 8,058                                    | 109                                            | 1                                          | 3.23E-48                      | 196                          | 109                   | 100.00           | 24,708,000  | 64             | 0.02 |
| AF442957.1                                | LVZ         | 520455                                         | 110           | 110                               | 100                                               | 0                           | 0                             | 8,006                                        | 8,115                                    | 1                                              | 110                                        | 1.93E-50                      | 204                          | 110                   | 100.00           | 24,708,000  | 236            | 0.09 |
| AF442957.1                                | LVZ         | 520621                                         | 110           | 110                               | 100                                               | 0                           | 0                             | 3,944                                        | 4,053                                    | 1                                              | 110                                        | 1.93E-50                      | 204                          | 110                   | 100.00           | 24,708,000  | 214            | 0.08 |
| AF442957.1                                | LVZ         | 525833                                         | 111           | 111                               | 99.099                                            | 1                           | 0                             | 6,916                                        | 7,026                                    | 111                                            | 1                                          | 2.50E-49                      | 200                          | 111                   | 100.00           | 24,708,000  | 150            | 0.05 |
| AF442957.1                                | LVZ         | 527243                                         | 111           | 111                               | 100                                               | 0                           | 0                             | 4,224                                        | 4,334                                    | 1                                              | 111                                        | 5.37E-51                      | 206                          | 111                   | 100.00           | 24,708,000  | 254            | 0.09 |
| AF442957.1                                | LVZ         | 531499                                         | 111           | 111                               | 99.099                                            | 1                           | 0                             | 11,867                                       | 11,977                                   | 1                                              | 111                                        | 2.50E-49                      | 200                          | 111                   | 100.00           | 24,708,000  | 192            | 0.07 |
| AF442957.1                                | LVZ         | 533427                                         | 111           | 111                               | 99.099                                            | 1                           | 0                             | 1,932                                        | 2,042                                    | 111                                            | 1                                          | 2.50E-49                      | 200                          | 111                   | 100.00           | 24,708,000  | 110            | 0.04 |
| AF442957.1                                | LVZ         | 533449                                         | 111           | 111                               | 99.099                                            | 1                           | 0                             | 11,002                                       | 11,112                                   | 111                                            | 1                                          | 2.50E-49                      | 200                          | 111                   | 100.00           | 24,708,000  | 90             | 0.03 |
| AF442957.1                                | LVZ         | 534809                                         | 111           | 111                               | 99.099                                            | 1                           | 0                             | 1,134                                        | 1,244                                    | 1                                              | 111                                        | 2.50E-49                      | 200                          | 111                   | 100.00           | 24,708,000  | 166            | 0.06 |
| AF442957.1                                | LVZ         | 535539                                         | 111           | 111                               | 98.198                                            | 2                           | 0                             | 8,325                                        | 8,435                                    | 111                                            | 1                                          | 1.16E-47                      | 195                          | 111                   | 100.00           | 24,708,000  | 6              | 0.00 |
| AF442957.1                                | LVZ         | 539197                                         | 111           | 111                               | 99.099                                            | 1                           | 0                             | 4,468                                        | 4,578                                    | 1                                              | 111                                        | 2.50E-49                      | 200                          | 111                   | 100.00           | 24,708,000  | 100            | 0.04 |
| AF442957.1                                | LVZ         | 539325                                         | 111           | 111                               | 98.198                                            | 2                           | 0                             | 7,308                                        | 7,418                                    | 1                                              | 111                                        | 1.16E-47                      | 195                          | 111                   | 100.00           | 24,708,000  | 86             | 0.03 |
| AF442957.1                                | LVZ         | 542979                                         | 111           | 111                               | 99.099                                            | 1                           | 0                             | 11,889                                       | 11,999                                   | 111                                            | 1                                          | 2.50E-49                      | 200                          | 111                   | 100.00           | 24,708,000  | 108            | 0.04 |
| AF442957.1                                | LVZ         | 544605                                         | 111           | 111                               | 99.099                                            | 1                           | 0                             | 2,939                                        | 3,049                                    | 1                                              | 111                                        | 2.50E-49                      | 200                          | 111                   | 100.00           | 24,708,000  | 14             | 0.01 |
| AF442957.1                                | LVZ         | 544773                                         | 111           | 111                               | 99.099                                            | 1                           | 0                             | 8,460                                        | 8,570                                    | 111                                            | 1                                          | 2.50E-49                      | 200                          | 111                   | 100.00           | 24,708,000  | 48             | 0.02 |
| AF442957.1                                | LVZ         | 547191                                         | 111           | 111                               | 99.099                                            | 1                           | 0                             | 11,917                                       | 12,027                                   | 1                                              | 111                                        | 2.50E-49                      | 200                          | 111                   | 100.00           | 24,708,000  | 64             | 0.02 |
| AF442957.1                                | LVZ         | 551079                                         | 111           | 111                               | 99.099                                            | 1                           | 0                             | 9,281                                        | 9,391                                    | 111                                            | 1                                          | 2.50E-49                      | 200                          | 111                   | 100.00           | 24,708,000  | 10             | 0.00 |
| AF442957.1                                | LVZ         | 552639                                         | 111           | 111                               | 99.099                                            | 1                           | 0                             | 4,224                                        | 4,334                                    | 111                                            | 1                                          | 2.50E-49                      | 200                          | 111                   | 100.00           | 24,708,000  | 8              | 0.00 |
| AF442957.1                                | LVZ         | 552987                                         | 111           | 112                               | 98.214                                            | 1                           | 1                             | 12,927                                       | 13,038                                   | 111                                            | 1                                          | 1.16E-47                      | 195                          | 111                   | 100.00           | 24,708,000  | 30             | 0.01 |

| Query Sequence Accession<br><i>qseqid</i> | Assembly ID | Subject Sequence ID/Contig ID<br><i>sseqid</i> | Contig Length | Alignment Length<br><i>length</i> | Percentage of Identical Matches<br><i>percent</i> | Mismatch<br><i>mismatch</i> | Gap Opening<br><i>gapopen</i> | Start of Alignment in Query<br><i>qstart</i> | End of Alignment in Query<br><i>qend</i> | Start of Alignment in Subject<br><i>sstart</i> | End of Alignment in Subject<br><i>send</i> | Expect Value<br><i>evalue</i> | Bit Score<br><i>bitscore</i> | True Alignment Length | Percent Coverage | Total Reads | Reads to Align | RPKM |
|-------------------------------------------|-------------|------------------------------------------------|---------------|-----------------------------------|---------------------------------------------------|-----------------------------|-------------------------------|----------------------------------------------|------------------------------------------|------------------------------------------------|--------------------------------------------|-------------------------------|------------------------------|-----------------------|------------------|-------------|----------------|------|
| AF442957.1                                | LVZ         | 554489                                         | 111           | 111                               | 99.099                                            | 1                           | 0                             | 12,221                                       | 12,331                                   | 111                                            | 1                                          | 2.50E-49                      | 200                          | 111                   | 100.00           | 24,708,000  | 146            | 0.05 |
| AF442957.1                                | LVZ         | 554811                                         | 111           | 111                               | 99.099                                            | 1                           | 0                             | 11,921                                       | 12,031                                   | 1                                              | 111                                        | 2.50E-49                      | 200                          | 111                   | 100.00           | 24,708,000  | 98             | 0.04 |
| AF442957.1                                | LVZ         | 557309                                         | 111           | 111                               | 98.198                                            | 2                           | 0                             | 4,531                                        | 4,641                                    | 1                                              | 111                                        | 1.16E-47                      | 195                          | 111                   | 100.00           | 24,708,000  | 74             | 0.03 |
| AF442957.1                                | LVZ         | 558989                                         | 111           | 111                               | 99.099                                            | 1                           | 0                             | 12,910                                       | 13,020                                   | 1                                              | 111                                        | 2.50E-49                      | 200                          | 111                   | 100.00           | 24,708,000  | 162            | 0.06 |
| AF442957.1                                | LVZ         | 559981                                         | 111           | 112                               | 98.214                                            | 1                           | 1                             | 239                                          | 350                                      | 1                                              | 111                                        | 1.16E-47                      | 195                          | 111                   | 100.00           | 24,708,000  | 68             | 0.02 |
| AF442957.1                                | LVZ         | 560705                                         | 111           | 111                               | 98.198                                            | 2                           | 0                             | 2,935                                        | 3,045                                    | 111                                            | 1                                          | 1.16E-47                      | 195                          | 111                   | 100.00           | 24,708,000  | 8              | 0.00 |
| AF442957.1                                | LVZ         | 561473                                         | 111           | 111                               | 100                                               | 0                           | 0                             | 9,281                                        | 9,391                                    | 111                                            | 1                                          | 5.37E-51                      | 206                          | 111                   | 100.00           | 24,708,000  | 204            | 0.07 |
| AF442957.1                                | LVZ         | 562447                                         | 111           | 111                               | 98.198                                            | 2                           | 0                             | 6,126                                        | 6,236                                    | 1                                              | 111                                        | 1.16E-47                      | 195                          | 111                   | 100.00           | 24,708,000  | 188            | 0.07 |
| AF442957.1                                | LVZ         | 566293                                         | 111           | 111                               | 99.099                                            | 1                           | 0                             | 11,965                                       | 12,075                                   | 1                                              | 111                                        | 2.50E-49                      | 200                          | 111                   | 100.00           | 24,708,000  | 122            | 0.04 |
| AF442957.1                                | LVZ         | 566387                                         | 111           | 111                               | 98.198                                            | 2                           | 0                             | 3,009                                        | 3,119                                    | 111                                            | 1                                          | 1.16E-47                      | 195                          | 111                   | 100.00           | 24,708,000  | 98             | 0.04 |
| AF442957.1                                | LVZ         | 568315                                         | 111           | 111                               | 99.099                                            | 1                           | 0                             | 213                                          | 323                                      | 111                                            | 1                                          | 2.50E-49                      | 200                          | 111                   | 100.00           | 24,708,000  | 144            | 0.05 |
| AF442957.1                                | LVZ         | 568379                                         | 111           | 111                               | 99.099                                            | 1                           | 0                             | 11,020                                       | 11,130                                   | 111                                            | 1                                          | 2.50E-49                      | 200                          | 111                   | 100.00           | 24,708,000  | 114            | 0.04 |
| AF442957.1                                | LVZ         | 569315                                         | 111           | 111                               | 99.099                                            | 1                           | 0                             | 8,325                                        | 8,435                                    | 111                                            | 1                                          | 2.50E-49                      | 200                          | 111                   | 100.00           | 24,708,000  | 122            | 0.04 |
| AF442957.1                                | LVZ         | 572007                                         | 111           | 111                               | 98.198                                            | 2                           | 0                             | 4,548                                        | 4,658                                    | 111                                            | 1                                          | 1.16E-47                      | 195                          | 111                   | 100.00           | 24,708,000  | 96             | 0.04 |
| AF442957.1                                | LVZ         | 576685                                         | 111           | 106                               | 99.057                                            | 1                           | 0                             | 1,941                                        | 2,046                                    | 1                                              | 106                                        | 1.50E-46                      | 191                          | 106                   | 95.50            | 24,708,000  | 124            | 0.05 |
| AF442957.1                                | LVZ         | 578019                                         | 111           | 111                               | 99.099                                            | 1                           | 0                             | 11,986                                       | 12,096                                   | 111                                            | 1                                          | 2.50E-49                      | 200                          | 111                   | 100.00           | 24,708,000  | 176            | 0.06 |
| AF442957.1                                | LVZ         | 579689                                         | 111           | 111                               | 99.099                                            | 1                           | 0                             | 11,041                                       | 11,151                                   | 111                                            | 1                                          | 2.50E-49                      | 200                          | 111                   | 100.00           | 24,708,000  | 244            | 0.09 |
| AF442957.1                                | LVZ         | 583839                                         | 111           | 111                               | 99.099                                            | 1                           | 0                             | 8,481                                        | 8,591                                    | 111                                            | 1                                          | 2.50E-49                      | 200                          | 111                   | 100.00           | 24,708,000  | 68             | 0.02 |
| AF442957.1                                | LVZ         | 584663                                         | 111           | 111                               | 99.099                                            | 1                           | 0                             | 8,474                                        | 8,584                                    | 1                                              | 111                                        | 2.50E-49                      | 200                          | 111                   | 100.00           | 24,708,000  | 114            | 0.04 |
| AF442957.1                                | LVZ         | 585133                                         | 111           | 111                               | 99.099                                            | 1                           | 0                             | 1,920                                        | 2,030                                    | 1                                              | 111                                        | 2.50E-49                      | 200                          | 111                   | 100.00           | 24,708,000  | 48             | 0.02 |
| AF442957.1                                | LVZ         | 600240                                         | 128           | 128                               | 100                                               | 0                           | 0                             | 6,974                                        | 7,101                                    | 128                                            | 1                                          | 1.91E-60                      | 237                          | 128                   | 100.00           | 24,708,000  | 254            | 0.08 |
| AF442957.1                                | LVZ         | 602922                                         | 134           | 134                               | 99.254                                            | 1                           | 0                             | 8,381                                        | 8,514                                    | 1                                              | 134                                        | 4.09E-62                      | 243                          | 134                   | 100.00           | 24,708,000  | 546            | 0.16 |
| AF442957.1                                | LVZ         | 611674                                         | 162           | 162                               | 98.765                                            | 2                           | 0                             | 6,940                                        | 7,101                                    | 162                                            | 1                                          | 5.19E-76                      | 289                          | 162                   | 100.00           | 24,708,000  | 722            | 0.18 |
| AF442957.1                                | LVZ         | 624040                                         | 166           | 166                               | 99.398                                            | 1                           | 0                             | 11,691                                       | 11,856                                   | 1                                              | 166                                        | 6.66E-80                      | 302                          | 166                   | 100.00           | 24,708,000  | 992            | 0.24 |
| AF442957.1                                | LVZ         | 694534                                         | 176           | 176                               | 99.432                                            | 1                           | 0                             | 25                                           | 200                                      | 1                                              | 176                                        | 1.84E-85                      | 320                          | 176                   | 100.00           | 24,708,000  | 892            | 0.21 |
| AF442957.1                                | LVZ         | 765444                                         | 190           | 191                               | 98.953                                            | 1                           | 1                             | 8,189                                        | 8,379                                    | 190                                            | 1                                          | 1.41E-91                      | 340                          | 190                   | 100.00           | 24,708,000  | 1,306          | 0.28 |
| AF442957.1                                | LVZ         | 787421                                         | 197           | 197                               | 100                                               | 0                           | 0                             | 3,999                                        | 4,195                                    | 1                                              | 197                                        | 8.38E-99                      | 364                          | 197                   | 100.00           | 24,708,000  | 1,308          | 0.27 |
| AF442957.1                                | LVZ         | 795775                                         | 199           | 199                               | 100                                               | 0                           | 0                             | 12,077                                       | 12,275                                   | 1                                              | 199                                        | 6.48E-100                     | 368                          | 199                   | 100.00           | 24,708,000  | 1,394          | 0.28 |
| AF442957.1                                | LVZ         | 806877                                         | 204           | 44                                | 95.455                                            | 2                           | 0                             | 10,879                                       | 10,922                                   | 160                                            | 203                                        | 2.04E-10                      | 71.3                         | 44                    | 21.57            | 24,708,000  | 14             | 0.01 |
| AF442957.1                                | LVZ         | 817543                                         | 209           | 209                               | 99.522                                            | 1                           | 0                             | 14,285                                       | 14,493                                   | 209                                            | 1                                          | 8.32E-104                     | 381                          | 209                   | 100.00           | 24,708,000  | 1,502          | 0.29 |
| AF442957.1                                | LVZ         | 819353                                         | 209           | 209                               | 93.301                                            | 14                          | 0                             | 14,285                                       | 14,493                                   | 209                                            | 1                                          | 3.98E-82                      | 309                          | 209                   | 100.00           | 24,708,000  | 34             | 0.01 |
| AF442957.1                                | LVZ         | 847463                                         | 228           | 228                               | 100                                               | 0                           | 0                             | 7,047                                        | 7,274                                    | 228                                            | 1                                          | 4.90E-116                     | 422                          | 228                   | 100.00           | 24,708,000  | 1,604          | 0.28 |
| AF442957.1                                | LVZ         | 858153                                         | 239           | 239                               | 100                                               | 0                           | 0                             | 9,908                                        | 10,146                                   | 1                                              | 239                                        | 3.76E-122                     | 442                          | 239                   | 100.00           | 24,708,000  | 1,992          | 0.34 |
| AF442957.1                                | LVZ         | 861635                                         | 243           | 243                               | 100                                               | 0                           | 0                             | 4,280                                        | 4,522                                    | 243                                            | 1                                          | 2.25E-124                     | 449                          | 243                   | 100.00           | 24,708,000  | 1,792          | 0.30 |
| AF442957.1                                | LVZ         | 875581                                         | 270           | 270                               | 100                                               | 0                           | 0                             | 9,619                                        | 9,888                                    | 1                                              | 270                                        | 2.20E-139                     | 499                          | 270                   | 100.00           | 24,708,000  | 2,438          | 0.37 |
| AF442957.1                                | LVZ         | 880517                                         | 286           | 287                               | 97.909                                            | 3                           | 3                             | 5,896                                        | 6,180                                    | 286                                            | 1                                          | 1.02E-137                     | 494                          | 284                   | 99.30            | 24,708,000  | 2,396          | 0.34 |
| AF442957.1                                | LVZ         | 881471                                         | 890           | 291                               | 99.313                                            | 0                           | 2                             | 9,337                                        | 9,626                                    | 1                                              | 290                                        | 3.63E-147                     | 525                          | 289                   | 32.47            | 24,708,000  | 2,510          | 0.35 |
| AF442957.1                                | LVZ         | 882001                                         | 293           | 266                               | 92.857                                            | 15                          | 3                             | 12,716                                       | 12,977                                   | 266                                            | 1                                          | 2.31E-104                     | 383                          | 263                   | 89.76            | 24,708,000  | 500            | 0.08 |
| AF442957.1                                | LVZ         | 888893                                         | 346           | 346                               | 100                                               | 0                           | 0                             | 10,711                                       | 11,056                                   | 1                                              | 346                                        | 0                             | 640                          | 346                   | 100.00           | 24,708,000  | 2,958          | 0.35 |
| AF442957.1                                | LVZ         | 889785                                         | 357           | 357                               | 99.72                                             | 1                           | 0                             | 4,616                                        | 4,972                                    | 1                                              | 357                                        | 0                             | 654                          | 357                   | 100.00           | 24,708,000  | 3,380          | 0.38 |
| AF442957.1                                | LVZ         | 890651                                         | 371           | 371                               | 100                                               | 0                           | 0                             | 8,965                                        | 9,335                                    | 1                                              | 371                                        | 0                             | 686                          | 371                   | 100.00           | 24,708,000  | 3,370          | 0.37 |
| AF442957.1                                | LVZ         | 892755                                         | 420           | 420                               | 100                                               | 0                           | 0                             | 488                                          | 907                                      | 1                                              | 420                                        | 0                             | 776                          | 420                   | 100.00           | 24,708,000  | 4,252          | 0.41 |

| Query Sequence Accession<br><i>qseqid</i> | Assembly ID | Subject Sequence ID/Contig ID<br><i>sseqid</i> | Contig Length | Alignment Length<br><i>length</i> | Percentage of Identical Matches<br><i>percent</i> | Mismatch<br><i>mismatch</i> | Gap Opening<br><i>gapopen</i> | Start of Alignment in Query<br><i>qstart</i> | End of Alignment in Query<br><i>qend</i> | Start of Alignment in Subject<br><i>sstart</i> | End of Alignment in Subject<br><i>send</i> | Expect Value<br><i>evalue</i> | Bit Score<br><i>bitscore</i> | True Alignment Length | Percent Coverage | Total Reads | Reads to Align | RPKM |
|-------------------------------------------|-------------|------------------------------------------------|---------------|-----------------------------------|---------------------------------------------------|-----------------------------|-------------------------------|----------------------------------------------|------------------------------------------|------------------------------------------------|--------------------------------------------|-------------------------------|------------------------------|-----------------------|------------------|-------------|----------------|------|
| AF442957.1                                | LVZ         | 892901                                         | 424           | 424                               | 100                                               | 0                           | 0                             | 8,537                                        | 8,960                                    | 1                                              | 424                                        | 0                             | 784                          | 424                   | 100.00           | 24,708,000  | 4,056          | 0.39 |
| AF442957.1                                | LVZ         | 894719                                         | 497           | 497                               | 99.396                                            | 3                           | 0                             | 10,221                                       | 10,717                                   | 1                                              | 497                                        | 0                             | 902                          | 497                   | 100.00           | 24,708,000  | 5,002          | 0.41 |
| AF442957.1                                | LVZ         | 895883                                         | 568           | 569                               | 98.77                                             | 5                           | 2                             | 7,435                                        | 8,002                                    | 1                                              | 568                                        | 0                             | 1011                         | 567                   | 99.82            | 24,708,000  | 5,908          | 0.42 |
| AF442957.1                                | LVZ         | 895989                                         | 577           | 577                               | 99.827                                            | 1                           | 0                             | 11,097                                       | 11,673                                   | 1                                              | 577                                        | 0                             | 1061                         | 577                   | 100.00           | 24,708,000  | 6,112          | 0.43 |
| AF442957.1                                | LVZ         | 896465                                         | 618           | 618                               | 99.838                                            | 1                           | 0                             | 12,326                                       | 12,943                                   | 1                                              | 618                                        | 0                             | 1136                         | 618                   | 100.00           | 24,708,000  | 6,352          | 0.42 |
| AF442957.1                                | LVZ         | 897367                                         | 743           | 740                               | 99.324                                            | 5                           | 0                             | 3,101                                        | 3,840                                    | 1                                              | 740                                        | 0                             | 1339                         | 740                   | 99.60            | 24,708,000  | 7,920          | 0.43 |
| AF442957.1                                | LVZ         | 897387                                         | 748           | 748                               | 99.465                                            | 4                           | 0                             | 6,223                                        | 6,970                                    | 1                                              | 748                                        | 0                             | 1360                         | 748                   | 100.00           | 24,708,000  | 8,382          | 0.45 |
| AF442957.1                                | LVZ         | 897425                                         | 754           | 755                               | 99.735                                            | 1                           | 1                             | 1,220                                        | 1,974                                    | 1                                              | 754                                        | 0                             | 1382                         | 754                   | 100.00           | 24,708,000  | 7,942          | 0.43 |
| AF442957.1                                | LVZ         | 897861                                         | 870           | 870                               | 99.885                                            | 1                           | 0                             | 4,965                                        | 5,834                                    | 1                                              | 870                                        | 0                             | 1602                         | 870                   | 100.00           | 24,708,000  | 9,782          | 0.46 |
| AF442957.1                                | LVZ         | 898189                                         | 979           | 980                               | 98.469                                            | 13                          | 2                             | 2,011                                        | 2,989                                    | 1                                              | 979                                        | 0                             | 1725                         | 978                   | 99.90            | 24,708,000  | 10,420         | 0.43 |
| AF442957.1                                | LVZ         | 898467                                         | 1,135         | 1,147                             | 81.604                                            | 118                         | 55                            | 5,431                                        | 6,496                                    | 1,135                                          | 1                                          | 0                             | 863                          | 1,092                 | 96.21            | 24,708,000  | 224            | 0.01 |
| AF442957.1                                | LVZ         | 898641                                         | 1,281         | 1,283                             | 99.143                                            | 8                           | 3                             | 12,984                                       | 14,265                                   | 1                                              | 1,281                                      | 0                             | 2305                         | 1,280                 | 99.92            | 24,708,000  | 13,632         | 0.43 |
| AF442957.1                                | LVZ         | 898767                                         | 1,432         | 1,454                             | 84.525                                            | 154                         | 53                            | 12,930                                       | 14,334                                   | 1                                              | 1,432                                      | 0                             | 1373                         | 1,401                 | 97.84            | 24,708,000  | 584            | 0.02 |
| AF442957.1                                | LVZ         | 898931                                         | 1,822         | 1,831                             | 85.309                                            | 237                         | 25                            | 6,702                                        | 8,514                                    | 1                                              | 1,817                                      | 0                             | 1862                         | 1,806                 | 99.12            | 24,708,000  | 846            | 0.02 |
| AF442957.1                                | LVZ         | 899029                                         | 2,249         | 2,254                             | 85.093                                            | 284                         | 37                            | 2,645                                        | 4,863                                    | 2,237                                          | 1                                          | 0                             | 2254                         | 2,217                 | 98.58            | 24,708,000  | 2,324          | 0.04 |
| AF442957.1                                | LVZ         | 899123                                         | 3,079         | 2,705                             | 85.213                                            | 350                         | 45                            | 1                                            | 2,675                                    | 385                                            | 3,069                                      | 0                             | 2734                         | 2,660                 | 86.39            | 24,708,000  | 1,442          | 0.02 |
| AF442957.1                                | LVZ         | 899141                                         | 4,005         | 4,032                             | 83.259                                            | 557                         | 85                            | 8,737                                        | 12,700                                   | 9                                              | 3,990                                      | 0                             | 3598                         | 3,947                 | 98.55            | 24,708,000  | 2,146          | 0.02 |
| AF442957.1                                | RSE         | 23164                                          | 56            | 55                                | 100                                               | 0                           | 0                             | 8,006                                        | 8,060                                    | 2                                              | 56                                         | 1.66E-20                      | 102                          | 55                    | 98.21            | 47,636,000  | -              | -    |
| AF442957.1                                | RSE         | 24660                                          | 56            | 54                                | 100                                               | 0                           | 0                             | 8,006                                        | 8,059                                    | 2                                              | 55                                         | 5.97E-20                      | 100                          | 54                    | 96.43            | 47,636,000  | -              | -    |
| AF442957.1                                | RSE         | 32609                                          | 57            | 57                                | 100                                               | 0                           | 0                             | 10,388                                       | 10,444                                   | 57                                             | 1                                          | 1.28E-21                      | 106                          | 57                    | 100.00           | 47,636,000  | -              | -    |
| AF442957.1                                | RSE         | 59249                                          | 60            | 60                                | 96.667                                            | 2                           | 0                             | 4,560                                        | 4,619                                    | 60                                             | 1                                          | 5.97E-20                      | 100                          | 60                    | 100.00           | 47,636,000  | -              | -    |
| AF442957.1                                | RSE         | 59251                                          | 60            | 60                                | 98.333                                            | 1                           | 0                             | 4,560                                        | 4,619                                    | 60                                             | 1                                          | 1.28E-21                      | 106                          | 60                    | 100.00           | 47,636,000  | -              | -    |
| AF442957.1                                | RSE         | 62167                                          | 60            | 60                                | 98.333                                            | 1                           | 0                             | 2,799                                        | 2,858                                    | 1                                              | 60                                         | 1.28E-21                      | 106                          | 60                    | 100.00           | 47,636,000  | -              | -    |
| AF442957.1                                | RSE         | 62253                                          | 60            | 60                                | 95                                                | 3                           | 0                             | 4,560                                        | 4,619                                    | 1                                              | 60                                         | 2.78E-18                      | 95.3                         | 60                    | 100.00           | 47,636,000  | -              | -    |
| AF442957.1                                | RSE         | 62807                                          | 60            | 60                                | 96.667                                            | 2                           | 0                             | 4,560                                        | 4,619                                    | 60                                             | 1                                          | 5.97E-20                      | 100                          | 60                    | 100.00           | 47,636,000  | -              | -    |
| AF442957.1                                | RSE         | 67530                                          | 61            | 61                                | 100                                               | 0                           | 0                             | 8,006                                        | 8,066                                    | 1                                              | 61                                         | 7.67E-24                      | 113                          | 61                    | 100.00           | 47,636,000  | -              | -    |
| AF442957.1                                | RSE         | 80102                                          | 64            | 64                                | 100                                               | 0                           | 0                             | 7,027                                        | 7,090                                    | 64                                             | 1                                          | 1.65E-25                      | 119                          | 64                    | 100.00           | 47,636,000  | -              | -    |
| AF442957.1                                | RSE         | 80679                                          | 64            | 64                                | 100                                               | 0                           | 0                             | 1,932                                        | 1,995                                    | 64                                             | 1                                          | 1.65E-25                      | 119                          | 64                    | 100.00           | 47,636,000  | -              | -    |
| AF442957.1                                | RSE         | 81351                                          | 64            | 64                                | 100                                               | 0                           | 0                             | 11,220                                       | 11,283                                   | 64                                             | 1                                          | 1.65E-25                      | 119                          | 64                    | 100.00           | 47,636,000  | -              | -    |
| AF442957.1                                | RSE         | 82120                                          | 64            | 64                                | 100                                               | 0                           | 0                             | 6,971                                        | 7,034                                    | 64                                             | 1                                          | 1.65E-25                      | 119                          | 64                    | 100.00           | 47,636,000  | 18             | 0.01 |
| AF442957.1                                | RSE         | 83811                                          | 64            | 64                                | 100                                               | 0                           | 0                             | 11,164                                       | 11,227                                   | 1                                              | 64                                         | 1.65E-25                      | 119                          | 64                    | 100.00           | 47,636,000  | -              | -    |
| AF442957.1                                | RSE         | 106785                                         | 72            | 73                                | 97.26                                             | 0                           | 2                             | 7,610                                        | 7,681                                    | 1                                              | 72                                         | 1.27E-26                      | 122                          | 71                    | 98.61            | 47,636,000  | -              | -    |
| AF442957.1                                | RSE         | 108025                                         | 73            | 73                                | 98.63                                             | 1                           | 0                             | 2,478                                        | 2,550                                    | 73                                             | 1                                          | 7.62E-29                      | 130                          | 73                    | 100.00           | 47,636,000  | 240            | 0.07 |
| AF442957.1                                | RSE         | 108583                                         | 73            | 73                                | 98.63                                             | 1                           | 0                             | 2,534                                        | 2,606                                    | 1                                              | 73                                         | 7.62E-29                      | 130                          | 73                    | 100.00           | 47,636,000  | 340            | 0.10 |
| AF442957.1                                | RSE         | 108887                                         | 73            | 73                                | 100                                               | 0                           | 0                             | 10,370                                       | 10,442                                   | 1                                              | 73                                         | 1.64E-30                      | 135                          | 73                    | 100.00           | 47,636,000  | 120            | 0.03 |
| AF442957.1                                | RSE         | 114109                                         | 76            | 76                                | 100                                               | 0                           | 0                             | 11,199                                       | 11,274                                   | 1                                              | 76                                         | 3.52E-32                      | 141                          | 76                    | 100.00           | 47,636,000  | 50             | 0.01 |
| AF442957.1                                | RSE         | 115684                                         | 77            | 77                                | 100                                               | 0                           | 0                             | 4,509                                        | 4,585                                    | 77                                             | 1                                          | 9.79E-33                      | 143                          | 77                    | 100.00           | 47,636,000  | 160            | 0.04 |
| AF442957.1                                | RSE         | 116064                                         | 77            | 77                                | 98.701                                            | 1                           | 0                             | 4,565                                        | 4,641                                    | 1                                              | 77                                         | 4.55E-31                      | 137                          | 77                    | 100.00           | 47,636,000  | 44             | 0.01 |
| AF442957.1                                | RSE         | 122077                                         | 81            | 81                                | 100                                               | 0                           | 0                             | 11,173                                       | 11,253                                   | 1                                              | 81                                         | 5.85E-35                      | 150                          | 81                    | 100.00           | 47,636,000  | 88             | 0.02 |
| AF442957.1                                | RSE         | 125403                                         | 84            | 84                                | 98.81                                             | 1                           | 0                             | 4,531                                        | 4,614                                    | 1                                              | 84                                         | 5.85E-35                      | 150                          | 84                    | 100.00           | 47,636,000  | 284            | 0.07 |
| AF442957.1                                | RSE         | 125661                                         | 84            | 84                                | 98.81                                             | 1                           | 0                             | 4,587                                        | 4,670                                    | 84                                             | 1                                          | 5.85E-35                      | 150                          | 84                    | 100.00           | 47,636,000  | 374            | 0.09 |
| AF442957.1                                | RSE         | 126160                                         | 84            | 85                                | 98.824                                            | 0                           | 1                             | 7,975                                        | 8,059                                    | 84                                             | 1                                          | 5.85E-35                      | 150                          | 84                    | 100.00           | 47,636,000  | 36             | 0.01 |

| Query Sequence Accession<br><i>qseqid</i> | Assembly ID | Subject Sequence ID/Contig ID<br><i>sseqid</i> | Contig Length | Alignment Length<br><i>length</i> | Percentage of Identical Matches<br><i>pident</i> | Mismatch<br><i>mismatch</i> | Gap Opening<br><i>gapopen</i> | Start of Alignment in Query<br><i>qstart</i> | End of Alignment in Query<br><i>qend</i> | Start of Alignment in Subject<br><i>sstart</i> | End of Alignment in Subject<br><i>send</i> | Expect Value<br><i>evalue</i> | Bit Score<br><i>bitscore</i> | True Alignment Length | Percent Coverage | Total Reads | Reads to Align | RPKM |
|-------------------------------------------|-------------|------------------------------------------------|---------------|-----------------------------------|--------------------------------------------------|-----------------------------|-------------------------------|----------------------------------------------|------------------------------------------|------------------------------------------------|--------------------------------------------|-------------------------------|------------------------------|-----------------------|------------------|-------------|----------------|------|
| AF442957.1                                | RSE         | 127354                                         | 86            | 86                                | 100                                              | 0                           | 0                             | 7,975                                        | 8,060                                    | 86                                             | 1                                          | 9.72E-38                      | 159                          | 86                    | 100.00           | 47,636,000  | 638            | 0.16 |
| AF442957.1                                | RSE         | 133195                                         | 91            | 91                                | 100                                              | 0                           | 0                             | 10,334                                       | 10,424                                   | 1                                              | 91                                         | 1.61E-40                      | 169                          | 91                    | 100.00           | 47,636,000  | 160            | 0.04 |
| AF442957.1                                | RSE         | 134989                                         | 93            | 93                                | 97.849                                           | 2                           | 0                             | 2,496                                        | 2,588                                    | 93                                             | 1                                          | 2.70E-38                      | 161                          | 93                    | 100.00           | 47,636,000  | 512            | 0.12 |
| AF442957.1                                | RSE         | 135859                                         | 94            | 95                                | 96.842                                           | 1                           | 2                             | 7,627                                        | 7,720                                    | 94                                             | 1                                          | 3.49E-37                      | 158                          | 93                    | 98.94            | 47,636,000  | 630            | 0.14 |
| AF442957.1                                | RSE         | 135967                                         | 94            | 95                                | 97.895                                           | 0                           | 2                             | 7,571                                        | 7,664                                    | 94                                             | 1                                          | 7.51E-39                      | 163                          | 93                    | 98.94            | 47,636,000  | 622            | 0.14 |
| AF442957.1                                | RSE         | 136385                                         | 95            | 95                                | 100                                              | 0                           | 0                             | 4,918                                        | 5,012                                    | 95                                             | 1                                          | 9.65E-43                      | 176                          | 95                    | 100.00           | 47,636,000  | 980            | 0.22 |
| AF442957.1                                | RSE         | 141571                                         | 101           | 101                               | 96.04                                            | 4                           | 0                             | 14,211                                       | 14,311                                   | 101                                            | 1                                          | 2.09E-39                      | 165                          | 101                   | 100.00           | 47,636,000  | 582            | 0.12 |
| AF442957.1                                | RSE         | 141909                                         | 101           | 102                               | 99.02                                            | 0                           | 1                             | 4,918                                        | 5,019                                    | 101                                            | 1                                          | 2.07E-44                      | 182                          | 101                   | 100.00           | 47,636,000  | 496            | 0.10 |
| AF442957.1                                | RSE         | 142373                                         | 101           | 102                               | 99.02                                            | 0                           | 1                             | 1,173                                        | 1,274                                    | 101                                            | 1                                          | 2.07E-44                      | 182                          | 101                   | 100.00           | 47,636,000  | 18             | 0.00 |
| AF442957.1                                | RSE         | 142567                                         | 102           | 102                               | 100                                              | 0                           | 0                             | 6,980                                        | 7,081                                    | 1                                              | 102                                        | 1.24E-46                      | 189                          | 102                   | 100.00           | 47,636,000  | 546            | 0.11 |
| AF442957.1                                | RSE         | 142577                                         | 102           | 102                               | 95.098                                           | 4                           | 1                             | 14,211                                       | 14,311                                   | 102                                            | 1                                          | 9.72E-38                      | 159                          | 101                   | 99.02            | 47,636,000  | 56             | 0.01 |
| AF442957.1                                | RSE         | 143061                                         | 102           | 102                               | 100                                              | 0                           | 0                             | 1,941                                        | 2,042                                    | 102                                            | 1                                          | 1.24E-46                      | 189                          | 102                   | 100.00           | 47,636,000  | 1,014          | 0.21 |
| AF442957.1                                | RSE         | 143317                                         | 102           | 103                               | 98.058                                           | 1                           | 1                             | 6,175                                        | 6,277                                    | 1                                              | 102                                        | 2.68E-43                      | 178                          | 102                   | 100.00           | 47,636,000  | 40             | 0.01 |
| AF442957.1                                | RSE         | 143425                                         | 102           | 102                               | 100                                              | 0                           | 0                             | 1,173                                        | 1,274                                    | 102                                            | 1                                          | 1.24E-46                      | 189                          | 102                   | 100.00           | 47,636,000  | 518            | 0.11 |
| AF442957.1                                | RSE         | 144325                                         | 103           | 103                               | 99.029                                           | 1                           | 0                             | 6,175                                        | 6,277                                    | 1                                              | 103                                        | 1.60E-45                      | 185                          | 103                   | 100.00           | 47,636,000  | 504            | 0.10 |
| AF442957.1                                | RSE         | 145251                                         | 104           | 104                               | 100                                              | 0                           | 0                             | 4,965                                        | 5,068                                    | 1                                              | 104                                        | 9.58E-48                      | 193                          | 104                   | 100.00           | 47,636,000  | 978            | 0.20 |
| AF442957.1                                | RSE         | 146135                                         | 105           | 105                               | 100                                              | 0                           | 0                             | 8,012                                        | 8,116                                    | 105                                            | 1                                          | 2.66E-48                      | 195                          | 105                   | 100.00           | 47,636,000  | 780            | 0.16 |
| AF442957.1                                | RSE         | 146677                                         | 106           | 106                               | 99.057                                           | 1                           | 0                             | 2,748                                        | 2,853                                    | 1                                              | 106                                        | 3.45E-47                      | 191                          | 106                   | 100.00           | 47,636,000  | 1,268          | 0.25 |
| AF442957.1                                | RSE         | 146891                                         | 106           | 106                               | 98.113                                           | 2                           | 0                             | 4,509                                        | 4,614                                    | 106                                            | 1                                          | 1.60E-45                      | 185                          | 106                   | 100.00           | 47,636,000  | 460            | 0.09 |
| AF442957.1                                | RSE         | 146905                                         | 106           | 104                               | 99.038                                           | 1                           | 0                             | 2,804                                        | 2,907                                    | 1                                              | 104                                        | 4.46E-46                      | 187                          | 104                   | 98.11            | 47,636,000  | 1,876          | 0.38 |
| AF442957.1                                | RSE         | 147327                                         | 106           | 106                               | 98.113                                           | 2                           | 0                             | 4,565                                        | 4,670                                    | 106                                            | 1                                          | 1.60E-45                      | 185                          | 106                   | 100.00           | 47,636,000  | 536            | 0.11 |
| AF442957.1                                | RSE         | 149785                                         | 108           | 108                               | 97.222                                           | 0                           | 3                             | 8,012                                        | 8,116                                    | 1                                              | 108                                        | 7.46E-44                      | 180                          | 105                   | 97.22            | 47,636,000  | 24             | 0.00 |
| AF442957.1                                | RSE         | 153305                                         | 111           | 111                               | 99.099                                           | 1                           | 0                             | 6,971                                        | 7,081                                    | 1                                              | 111                                        | 5.73E-50                      | 200                          | 111                   | 100.00           | 47,636,000  | 372            | 0.07 |
| AF442957.1                                | RSE         | 154063                                         | 111           | 111                               | 97.297                                           | 3                           | 0                             | 2,478                                        | 2,588                                    | 111                                            | 1                                          | 1.24E-46                      | 189                          | 111                   | 100.00           | 47,636,000  | 906            | 0.17 |
| AF442957.1                                | RSE         | 155847                                         | 111           | 111                               | 99.099                                           | 1                           | 0                             | 1,932                                        | 2,042                                    | 111                                            | 1                                          | 5.73E-50                      | 200                          | 111                   | 100.00           | 47,636,000  | 718            | 0.14 |
| AF442957.1                                | RSE         | 158883                                         | 111           | 111                               | 99.099                                           | 1                           | 0                             | 11,164                                       | 11,274                                   | 1                                              | 111                                        | 5.73E-50                      | 200                          | 111                   | 100.00           | 47,636,000  | 336            | 0.06 |
| AF442957.1                                | RSE         | 159525                                         | 111           | 111                               | 97.297                                           | 3                           | 0                             | 2,496                                        | 2,606                                    | 1                                              | 111                                        | 1.24E-46                      | 189                          | 111                   | 100.00           | 47,636,000  | 792            | 0.15 |
| AF442957.1                                | RSE         | 160657                                         | 111           | 111                               | 99.099                                           | 1                           | 0                             | 6,410                                        | 6,520                                    | 111                                            | 1                                          | 5.73E-50                      | 200                          | 111                   | 100.00           | 47,636,000  | 76             | 0.01 |
| AF442957.1                                | RSE         | 161791                                         | 111           | 111                               | 98.198                                           | 2                           | 0                             | 2,748                                        | 2,858                                    | 111                                            | 1                                          | 2.66E-48                      | 195                          | 111                   | 100.00           | 47,636,000  | 374            | 0.07 |
| AF442957.1                                | RSE         | 163105                                         | 111           | 111                               | 98.198                                           | 2                           | 0                             | 4,531                                        | 4,641                                    | 1                                              | 111                                        | 2.66E-48                      | 195                          | 111                   | 100.00           | 47,636,000  | 720            | 0.14 |
| AF442957.1                                | RSE         | 163325                                         | 111           | 111                               | 100                                              | 0                           | 0                             | 10,838                                       | 10,948                                   | 111                                            | 1                                          | 1.23E-51                      | 206                          | 111                   | 100.00           | 47,636,000  | 1,658          | 0.31 |
| AF442957.1                                | RSE         | 163681                                         | 111           | 111                               | 100                                              | 0                           | 0                             | 11,493                                       | 11,603                                   | 111                                            | 1                                          | 1.23E-51                      | 206                          | 111                   | 100.00           | 47,636,000  | 1,188          | 0.22 |
| AF442957.1                                | RSE         | 163901                                         | 111           | 111                               | 99.099                                           | 1                           | 0                             | 3,329                                        | 3,439                                    | 111                                            | 1                                          | 5.73E-50                      | 200                          | 111                   | 100.00           | 47,636,000  | 204            | 0.04 |
| AF442957.1                                | RSE         | 164433                                         | 111           | 111                               | 99.099                                           | 1                           | 0                             | 11,143                                       | 11,253                                   | 1                                              | 111                                        | 5.73E-50                      | 200                          | 111                   | 100.00           | 47,636,000  | 514            | 0.10 |
| AF442957.1                                | RSE         | 166195                                         | 111           | 111                               | 99.099                                           | 1                           | 0                             | 4,958                                        | 5,068                                    | 1                                              | 111                                        | 5.73E-50                      | 200                          | 111                   | 100.00           | 47,636,000  | 474            | 0.09 |
| AF442957.1                                | RSE         | 167053                                         | 111           | 111                               | 99.099                                           | 1                           | 0                             | 10,334                                       | 10,444                                   | 1                                              | 111                                        | 5.73E-50                      | 200                          | 111                   | 100.00           | 47,636,000  | 376            | 0.07 |
| AF442957.1                                | RSE         | 167575                                         | 111           | 112                               | 97.321                                           | 1                           | 2                             | 7,571                                        | 7,681                                    | 1                                              | 111                                        | 1.24E-46                      | 189                          | 110                   | 99.10            | 47,636,000  | 480            | 0.09 |
| AF442957.1                                | RSE         | 168509                                         | 111           | 111                               | 99.099                                           | 1                           | 0                             | 6,980                                        | 7,090                                    | 1                                              | 111                                        | 5.73E-50                      | 200                          | 111                   | 100.00           | 47,636,000  | 428            | 0.08 |
| AF442957.1                                | RSE         | 169047                                         | 111           | 106                               | 99.057                                           | 1                           | 0                             | 1,941                                        | 2,046                                    | 1                                              | 106                                        | 3.45E-47                      | 191                          | 106                   | 95.50            | 47,636,000  | 550            | 0.11 |
| AF442957.1                                | RSE         | 169419                                         | 111           | 111                               | 99.099                                           | 1                           | 0                             | 10,838                                       | 10,948                                   | 1                                              | 111                                        | 5.73E-50                      | 200                          | 111                   | 100.00           | 47,636,000  | 72             | 0.01 |
| AF442957.1                                | RSE         | 169763                                         | 111           | 111                               | 100                                              | 0                           | 0                             | 3,329                                        | 3,439                                    | 111                                            | 1                                          | 1.23E-51                      | 206                          | 111                   | 100.00           | 47,636,000  | 1,128          | 0.21 |
| AF442957.1                                | RSE         | 169871                                         | 111           | 111                               | 99.099                                           | 1                           | 0                             | 11,173                                       | 11,283                                   | 111                                            | 1                                          | 5.73E-50                      | 200                          | 111                   | 100.00           | 47,636,000  | 798            | 0.15 |

| Query Sequence Accession<br><i>qseqid</i> | Assembly ID | Subject Sequence ID/Contig ID<br><i>sseqid</i> | Contig Length | Alignment Length<br><i>length</i> | Percentage of Identical Matches<br><i>percent</i> | Mismatch<br><i>mismatch</i> | Gap Opening<br><i>gapopen</i> | Start of Alignment in Query<br><i>qstart</i> | End of Alignment in Query<br><i>qend</i> | Start of Alignment in Subject<br><i>sstart</i> | End of Alignment in Subject<br><i>send</i> | Expect Value<br><i>evalue</i> | Bit Score<br><i>bitscore</i> | True Alignment Length | Percent Coverage | Total Reads | Reads to Align | RPKM |
|-------------------------------------------|-------------|------------------------------------------------|---------------|-----------------------------------|---------------------------------------------------|-----------------------------|-------------------------------|----------------------------------------------|------------------------------------------|------------------------------------------------|--------------------------------------------|-------------------------------|------------------------------|-----------------------|------------------|-------------|----------------|------|
| AF442957.1                                | RSE         | 169921                                         | 111           | 109                               | 98.165                                            | 2                           | 0                             | 2,799                                        | 2,907                                    | 111                                            | 3                                          | 3.45E-47                      | 191                          | 109                   | 98.20            | 47,636,000  | 176            | 0.03 |
| AF442957.1                                | RSE         | 169997                                         | 111           | 111                               | 99.099                                            | 1                           | 0                             | 10,314                                       | 10,424                                   | 1                                              | 111                                        | 5.73E-50                      | 200                          | 111                   | 100.00           | 47,636,000  | 306            | 0.06 |
| AF442957.1                                | RSE         | 170091                                         | 111           | 111                               | 100                                               | 0                           | 0                             | 6,410                                        | 6,520                                    | 1                                              | 111                                        | 1.23E-51                      | 206                          | 111                   | 100.00           | 47,636,000  | 524            | 0.10 |
| AF442957.1                                | RSE         | 170635                                         | 111           | 112                               | 96.429                                            | 2                           | 2                             | 7,610                                        | 7,720                                    | 111                                            | 1                                          | 5.77E-45                      | 183                          | 110                   | 99.10            | 47,636,000  | 520            | 0.10 |
| AF442957.1                                | RSE         | 174825                                         | 121           | 121                               | 97.521                                            | 3                           | 0                             | 2,935                                        | 3,055                                    | 121                                            | 1                                          | 3.42E-52                      | 207                          | 121                   | 100.00           | 47,636,000  | 188            | 0.03 |
| AF442957.1                                | RSE         | 174865                                         | 121           | 121                               | 99.174                                            | 1                           | 0                             | 2,935                                        | 3,055                                    | 121                                            | 1                                          | 1.58E-55                      | 219                          | 121                   | 100.00           | 47,636,000  | 1,928          | 0.33 |
| AF442957.1                                | RSE         | 175775                                         | 125           | 125                               | 100                                               | 0                           | 0                             | 11,549                                       | 11,673                                   | 1                                              | 125                                        | 2.03E-59                      | 231                          | 125                   | 100.00           | 47,636,000  | 1,316          | 0.22 |
| AF442957.1                                | RSE         | 177513                                         | 135           | 135                               | 97.778                                            | 3                           | 0                             | 2,855                                        | 2,989                                    | 1                                              | 135                                        | 5.64E-60                      | 233                          | 135                   | 100.00           | 47,636,000  | 2,046          | 0.32 |
| AF442957.1                                | RSE         | 178399                                         | 142           | 142                               | 98.592                                            | 2                           | 0                             | 10,390                                       | 10,531                                   | 142                                            | 1                                          | 1.56E-65                      | 252                          | 142                   | 100.00           | 47,636,000  | 2,188          | 0.32 |
| AF442957.1                                | RSE         | 178687                                         | 144           | 144                               | 97.222                                            | 4                           | 0                             | 10,388                                       | 10,531                                   | 144                                            | 1                                          | 2.61E-63                      | 244                          | 144                   | 100.00           | 47,636,000  | 144            | 0.02 |
| AF442957.1                                | RSE         | 195883                                         | 192           | 192                               | 88.542                                            | 22                          | 0                             | 1,664                                        | 1,855                                    | 1                                              | 192                                        | 5.64E-60                      | 233                          | 192                   | 100.00           | 47,636,000  | 32             | 0.00 |
| AF442957.1                                | RSE         | 202533                                         | 217           | 217                               | 91.244                                            | 19                          | 0                             | 10,790                                       | 11,006                                   | 217                                            | 1                                          | 7.10E-79                      | 296                          | 217                   | 100.00           | 47,636,000  | 60             | 0.01 |
| AF442957.1                                | RSE         | 203441                                         | 222           | 220                               | 91.818                                            | 6                           | 9                             | 14,028                                       | 14,239                                   | 222                                            | 7                                          | 7.10E-79                      | 296                          | 211                   | 95.05            | 47,636,000  | 46             | 0.00 |
| AF442957.1                                | RSE         | 205915                                         | 239           | 239                               | 100                                               | 0                           | 0                             | 7,036                                        | 7,274                                    | 1                                              | 239                                        | 8.62E-123                     | 442                          | 239                   | 100.00           | 47,636,000  | 5,020          | 0.44 |
| AF442957.1                                | RSE         | 206253                                         | 242           | 242                               | 100                                               | 0                           | 0                             | 6,223                                        | 6,464                                    | 1                                              | 242                                        | 1.85E-124                     | 448                          | 242                   | 100.00           | 47,636,000  | 1,246          | 0.11 |
| AF442957.1                                | RSE         | 207351                                         | 251           | 248                               | 100                                               | 0                           | 0                             | 2,555                                        | 2,802                                    | 248                                            | 1                                          | 8.55E-128                     | 459                          | 248                   | 98.80            | 47,636,000  | 6,546          | 0.55 |
| AF442957.1                                | RSE         | 209109                                         | 270           | 250                               | 89.2                                              | 27                          | 0                             | 3,157                                        | 3,406                                    | 270                                            | 21                                         | 7.05E-84                      | 313                          | 250                   | 92.59            | 47,636,000  | 628            | 0.05 |
| AF442957.1                                | RSE         | 211013                                         | 299           | 299                               | 99.666                                            | 1                           | 0                             | 7,327                                        | 7,625                                    | 1                                              | 299                                        | 1.77E-154                     | 547                          | 299                   | 100.00           | 47,636,000  | 4,228          | 0.30 |
| AF442957.1                                | RSE         | 211267                                         | 304           | 304                               | 100                                               | 0                           | 0                             | 10,894                                       | 11,197                                   | 304                                            | 1                                          | 6.34E-159                     | 562                          | 304                   | 100.00           | 47,636,000  | 6,418          | 0.44 |
| AF442957.1                                | RSE         | 211505                                         | 308           | 308                               | 98.701                                            | 4                           | 0                             | 7,666                                        | 7,973                                    | 1                                              | 308                                        | 1.77E-154                     | 547                          | 308                   | 100.00           | 47,636,000  | 4,328          | 0.29 |
| AF442957.1                                | RSE         | 212025                                         | 319           | 319                               | 99.687                                            | 1                           | 0                             | 11,229                                       | 11,547                                   | 1                                              | 319                                        | 1.35E-165                     | 584                          | 319                   | 100.00           | 47,636,000  | 7,664          | 0.50 |
| AF442957.1                                | RSE         | 213527                                         | 357           | 357                               | 99.72                                             | 1                           | 0                             | 4,616                                        | 4,972                                    | 1                                              | 357                                        | 0                             | 654                          | 357                   | 100.00           | 47,636,000  | 8,718          | 0.51 |
| AF442957.1                                | RSE         | 214013                                         | 373           | 374                               | 98.128                                            | 4                           | 3                             | 5,858                                        | 6,229                                    | 1                                              | 373                                        | 0                             | 649                          | 371                   | 99.46            | 47,636,000  | 5,892          | 0.33 |
| AF442957.1                                | RSE         | 214267                                         | 383           | 383                               | 98.956                                            | 4                           | 0                             | 3,001                                        | 3,383                                    | 1                                              | 383                                        | 0                             | 686                          | 383                   | 100.00           | 47,636,000  | 8,400          | 0.46 |
| AF442957.1                                | RSE         | 215061                                         | 416           | 416                               | 99.279                                            | 3                           | 0                             | 10,477                                       | 10,892                                   | 1                                              | 416                                        | 0                             | 752                          | 416                   | 100.00           | 47,636,000  | 11,268         | 0.57 |
| AF442957.1                                | RSE         | 215917                                         | 459           | 456                               | 99.561                                            | 2                           | 0                             | 3,385                                        | 3,840                                    | 459                                            | 4                                          | 0                             | 832                          | 456                   | 99.35            | 47,636,000  | 10,306         | 0.47 |
| AF442957.1                                | RSE         | 216863                                         | 536           | 537                               | 98.138                                            | 8                           | 2                             | 1,997                                        | 2,532                                    | 1                                              | 536                                        | 0                             | 935                          | 535                   | 99.81            | 47,636,000  | 19,284         | 0.75 |
| AF442957.1                                | RSE         | 217065                                         | 560           | 560                               | 99.286                                            | 4                           | 0                             | 6,466                                        | 7,025                                    | 1                                              | 560                                        | 0                             | 1013                         | 560                   | 100.00           | 47,636,000  | 6,006          | 0.23 |
| AF442957.1                                | RSE         | 217947                                         | 719           | 719                               | 100                                               | 0                           | 0                             | 3,845                                        | 4,563                                    | 1                                              | 719                                        | 0                             | 1328                         | 719                   | 100.00           | 47,636,000  | 12,754         | 0.37 |
| AF442957.1                                | RSE         | 218111                                         | 765           | 279                               | 99.642                                            | 1                           | 0                             | 14,257                                       | 14,535                                   | 1                                              | 279                                        | 2.33E-143                     | 510                          | 279                   | 36.47            | 47,636,000  | 5,262          | 0.40 |
| AF442957.1                                | RSE         | 218117                                         | 766           | 767                               | 99.739                                            | 1                           | 1                             | 1,220                                        | 1,986                                    | 1                                              | 766                                        | 0                             | 1404                         | 766                   | 100.00           | 47,636,000  | 20,022         | 0.55 |
| AF442957.1                                | RSE         | 218359                                         | 843           | 843                               | 99.881                                            | 1                           | 0                             | 5,014                                        | 5,856                                    | 843                                            | 1                                          | 0                             | 1552                         | 843                   | 100.00           | 47,636,000  | 19,456         | 0.48 |
| AF442957.1                                | RSE         | 218947                                         | 1,316         | 1,227                             | 99.837                                            | 2                           | 0                             | 1                                            | 1,227                                    | 1,227                                          | 1                                          | 0                             | 2255                         | 1,227                 | 93.24            | 47,636,000  | 11,366         | 0.19 |
| AF442957.1                                | RSE         | 219177                                         | 2,306         | 2,308                             | 99.783                                            | 2                           | 3                             | 8,062                                        | 10,368                                   | 2,306                                          | 1                                          | 0                             | 4231                         | 2,305                 | 99.96            | 47,636,000  | 38,758         | 0.35 |
| AF442957.1                                | RSE         | 219205                                         | 2,596         | 2,598                             | 99.5                                              | 10                          | 3                             | 11,669                                       | 14,265                                   | 1                                              | 2,596                                      | 0                             | 4723                         | 2,595                 | 99.96            | 47,636,000  | 42,734         | 0.35 |
| AF442957.1                                | RSZ         | 660                                            | 56            | 55                                | 100                                               | 0                           | 0                             | 8,005                                        | 8,059                                    | 56                                             | 2                                          | 1.05E-20                      | 102                          | 55                    | 98.21            | 36,782,000  | -              | -    |
| AF442957.1                                | RSZ         | 662                                            | 56            | 56                                | 100                                               | 0                           | 0                             | 8,005                                        | 8,060                                    | 56                                             | 1                                          | 2.93E-21                      | 104                          | 56                    | 100.00           | 36,782,000  | -              | -    |
| AF442957.1                                | RSZ         | 9773                                           | 56            | 56                                | 100                                               | 0                           | 0                             | 6,222                                        | 6,277                                    | 1                                              | 56                                         | 2.93E-21                      | 104                          | 56                    | 100.00           | 36,782,000  | -              | -    |
| AF442957.1                                | RSZ         | 12850                                          | 56            | 55                                | 100                                               | 0                           | 0                             | 8,006                                        | 8,060                                    | 2                                              | 56                                         | 1.05E-20                      | 102                          | 55                    | 98.21            | 36,782,000  | -              | -    |
| AF442957.1                                | RSZ         | 13597                                          | 56            | 54                                | 100                                               | 0                           | 0                             | 8,006                                        | 8,059                                    | 2                                              | 55                                         | 3.79E-20                      | 100                          | 54                    | 96.43            | 36,782,000  | -              | -    |
| AF442957.1                                | RSZ         | 33153                                          | 60            | 60                                | 96.667                                            | 2                           | 0                             | 4,560                                        | 4,619                                    | 60                                             | 1                                          | 3.79E-20                      | 100                          | 60                    | 100.00           | 36,782,000  | -              | -    |
| AF442957.1                                | RSZ         | 33155                                          | 60            | 60                                | 98.333                                            | 1                           | 0                             | 4,560                                        | 4,619                                    | 60                                             | 1                                          | 8.14E-22                      | 106                          | 60                    | 100.00           | 36,782,000  | -              | -    |

| Query Sequence Accession<br><i>qseqid</i> | Assembly ID | Subject Sequence ID/Contig ID<br><i>sseqid</i> | Contig Length | Alignment Length<br><i>length</i> | Percentage of Identical Matches<br><i>percent</i> | Mismatch<br><i>mismatch</i> | Gap Opening<br><i>gapopen</i> | Start of Alignment in Query<br><i>qstart</i> | End of Alignment in Query<br><i>qend</i> | Start of Alignment in Subject<br><i>sstart</i> | End of Alignment in Subject<br><i>send</i> | Expect Value<br><i>evalue</i> | Bit Score<br><i>bitscore</i> | True Alignment Length | Percent Coverage | Total Reads | Reads to Align | RPKM |
|-------------------------------------------|-------------|------------------------------------------------|---------------|-----------------------------------|---------------------------------------------------|-----------------------------|-------------------------------|----------------------------------------------|------------------------------------------|------------------------------------------------|--------------------------------------------|-------------------------------|------------------------------|-----------------------|------------------|-------------|----------------|------|
| AF442957.1                                | RSZ         | 34769                                          | 60            | 60                                | 95                                                | 3                           | 0                             | 4,560                                        | 4,619                                    | 1                                              | 60                                         | 1.76E-18                      | 95.3                         | 60                    | 100.00           | 36,782,000  | -              | -    |
| AF442957.1                                | RSZ         | 35119                                          | 60            | 60                                | 96.667                                            | 2                           | 0                             | 4,560                                        | 4,619                                    | 60                                             | 1                                          | 3.79E-20                      | 100                          | 60                    | 100.00           | 36,782,000  | -              | -    |
| AF442957.1                                | RSZ         | 39052                                          | 61            | 61                                | 98.361                                            | 1                           | 0                             | 8,006                                        | 8,066                                    | 61                                             | 1                                          | 2.26E-22                      | 108                          | 61                    | 100.00           | 36,782,000  | -              | -    |
| AF442957.1                                | RSZ         | 45515                                          | 64            | 64                                | 100                                               | 0                           | 0                             | 1,932                                        | 1,995                                    | 64                                             | 1                                          | 1.05E-25                      | 119                          | 64                    | 100.00           | 36,782,000  | -              | -    |
| AF442957.1                                | RSZ         | 65983                                          | 77            | 77                                | 100                                               | 0                           | 0                             | 4,509                                        | 4,585                                    | 77                                             | 1                                          | 6.21E-33                      | 143                          | 77                    | 100.00           | 36,782,000  | 44             | 0.02 |
| AF442957.1                                | RSZ         | 66221                                          | 77            | 77                                | 98.701                                            | 1                           | 0                             | 4,565                                        | 4,641                                    | 1                                              | 77                                         | 2.89E-31                      | 137                          | 77                    | 100.00           | 36,782,000  | 12             | 0.00 |
| AF442957.1                                | RSZ         | 69677                                          | 81            | 81                                | 98.765                                            | 1                           | 0                             | 7,379                                        | 7,459                                    | 81                                             | 1                                          | 1.73E-33                      | 145                          | 81                    | 100.00           | 36,782,000  | 36             | 0.01 |
| AF442957.1                                | RSZ         | 69955                                          | 81            | 81                                | 100                                               | 0                           | 0                             | 7,379                                        | 7,459                                    | 1                                              | 81                                         | 3.71E-35                      | 150                          | 81                    | 100.00           | 36,782,000  | 110            | 0.04 |
| AF442957.1                                | RSZ         | 72067                                          | 84            | 84                                | 98.81                                             | 1                           | 0                             | 4,531                                        | 4,614                                    | 1                                              | 84                                         | 3.71E-35                      | 150                          | 84                    | 100.00           | 36,782,000  | 96             | 0.03 |
| AF442957.1                                | RSZ         | 72233                                          | 84            | 84                                | 98.81                                             | 1                           | 0                             | 4,587                                        | 4,670                                    | 84                                             | 1                                          | 3.71E-35                      | 150                          | 84                    | 100.00           | 36,782,000  | 146            | 0.05 |
| AF442957.1                                | RSZ         | 72569                                          | 85            | 85                                | 100                                               | 0                           | 0                             | 7,975                                        | 8,059                                    | 1                                              | 85                                         | 2.22E-37                      | 158                          | 85                    | 100.00           | 36,782,000  | 182            | 0.06 |
| AF442957.1                                | RSZ         | 81505                                          | 99            | 100                               | 99                                                | 0                           | 1                             | 7,960                                        | 8,059                                    | 99                                             | 1                                          | 1.70E-43                      | 178                          | 99                    | 100.00           | 36,782,000  | 138            | 0.04 |
| AF442957.1                                | RSZ         | 81655                                          | 100           | 101                               | 99.01                                             | 0                           | 1                             | 12,889                                       | 12,989                                   | 1                                              | 100                                        | 4.73E-44                      | 180                          | 100                   | 100.00           | 36,782,000  | 18             | 0.00 |
| AF442957.1                                | RSZ         | 81679                                          | 100           | 101                               | 99.01                                             | 0                           | 1                             | 12,031                                       | 12,131                                   | 100                                            | 1                                          | 4.73E-44                      | 180                          | 100                   | 100.00           | 36,782,000  | 16             | 0.00 |
| AF442957.1                                | RSZ         | 82169                                          | 101           | 101                               | 96.04                                             | 4                           | 0                             | 14,211                                       | 14,311                                   | 101                                            | 1                                          | 1.32E-39                      | 165                          | 101                   | 100.00           | 36,782,000  | 200            | 0.05 |
| AF442957.1                                | RSZ         | 82199                                          | 101           | 101                               | 100                                               | 0                           | 0                             | 12,889                                       | 12,989                                   | 1                                              | 101                                        | 2.83E-46                      | 187                          | 101                   | 100.00           | 36,782,000  | 284            | 0.08 |
| AF442957.1                                | RSZ         | 82535                                          | 101           | 101                               | 100                                               | 0                           | 0                             | 12,031                                       | 12,131                                   | 1                                              | 101                                        | 2.83E-46                      | 187                          | 101                   | 100.00           | 36,782,000  | 404            | 0.11 |
| AF442957.1                                | RSZ         | 82671                                          | 101           | 101                               | 99.01                                             | 1                           | 0                             | 6,176                                        | 6,276                                    | 1                                              | 101                                        | 1.32E-44                      | 182                          | 101                   | 100.00           | 36,782,000  | 132            | 0.04 |
| AF442957.1                                | RSZ         | 82837                                          | 102           | 102                               | 95.098                                            | 4                           | 1                             | 14,211                                       | 14,311                                   | 102                                            | 1                                          | 6.16E-38                      | 159                          | 101                   | 99.02            | 36,782,000  | 18             | 0.00 |
| AF442957.1                                | RSZ         | 83179                                          | 102           | 102                               | 100                                               | 0                           | 0                             | 1,941                                        | 2,042                                    | 102                                            | 1                                          | 7.86E-47                      | 189                          | 102                   | 100.00           | 36,782,000  | 254            | 0.07 |
| AF442957.1                                | RSZ         | 83327                                          | 102           | 103                               | 98.058                                            | 1                           | 1                             | 6,175                                        | 6,277                                    | 1                                              | 102                                        | 1.70E-43                      | 178                          | 102                   | 100.00           | 36,782,000  | 40             | 0.01 |
| AF442957.1                                | RSZ         | 83335                                          | 102           | 102                               | 98.039                                            | 1                           | 1                             | 6,176                                        | 6,276                                    | 102                                            | 1                                          | 6.12E-43                      | 176                          | 101                   | 99.02            | 36,782,000  | 6              | 0.00 |
| AF442957.1                                | RSZ         | 84539                                          | 104           | 104                               | 99.038                                            | 1                           | 0                             | 8,012                                        | 8,115                                    | 1                                              | 104                                        | 2.83E-46                      | 187                          | 104                   | 100.00           | 36,782,000  | 112            | 0.03 |
| AF442957.1                                | RSZ         | 85637                                          | 106           | 106                               | 98.113                                            | 2                           | 0                             | 4,509                                        | 4,614                                    | 106                                            | 1                                          | 1.02E-45                      | 185                          | 106                   | 100.00           | 36,782,000  | 162            | 0.04 |
| AF442957.1                                | RSZ         | 85901                                          | 106           | 106                               | 98.113                                            | 2                           | 0                             | 4,565                                        | 4,670                                    | 106                                            | 1                                          | 1.02E-45                      | 185                          | 106                   | 100.00           | 36,782,000  | 232            | 0.06 |
| AF442957.1                                | RSZ         | 87437                                          | 108           | 108                               | 97.222                                            | 0                           | 3                             | 8,012                                        | 8,116                                    | 1                                              | 108                                        | 4.73E-44                      | 180                          | 105                   | 97.22            | 36,782,000  | 14             | 0.00 |
| AF442957.1                                | RSZ         | 88721                                          | 110           | 110                               | 100                                               | 0                           | 0                             | 8,006                                        | 8,115                                    | 1                                              | 110                                        | 2.81E-51                      | 204                          | 110                   | 100.00           | 36,782,000  | 182            | 0.04 |
| AF442957.1                                | RSZ         | 89281                                          | 111           | 111                               | 98.198                                            | 2                           | 0                             | 6,585                                        | 6,695                                    | 1                                              | 111                                        | 1.69E-48                      | 195                          | 111                   | 100.00           | 36,782,000  | 28             | 0.01 |
| AF442957.1                                | RSZ         | 89283                                          | 111           | 111                               | 99.099                                            | 1                           | 0                             | 6,585                                        | 6,695                                    | 1                                              | 111                                        | 3.63E-50                      | 200                          | 111                   | 100.00           | 36,782,000  | 156            | 0.04 |
| AF442957.1                                | RSZ         | 89369                                          | 111           | 106                               | 99.057                                            | 1                           | 0                             | 1,941                                        | 2,046                                    | 1                                              | 106                                        | 2.19E-47                      | 191                          | 106                   | 95.50            | 36,782,000  | 220            | 0.06 |
| AF442957.1                                | RSZ         | 91255                                          | 111           | 111                               | 99.099                                            | 1                           | 0                             | 1,932                                        | 2,042                                    | 111                                            | 1                                          | 3.63E-50                      | 200                          | 111                   | 100.00           | 36,782,000  | 286            | 0.07 |
| AF442957.1                                | RSZ         | 95739                                          | 111           | 111                               | 98.198                                            | 2                           | 0                             | 4,531                                        | 4,641                                    | 1                                              | 111                                        | 1.69E-48                      | 195                          | 111                   | 100.00           | 36,782,000  | 264            | 0.06 |
| AF442957.1                                | RSZ         | 128737                                         | 376           | 376                               | 100                                               | 0                           | 0                             | 11,710                                       | 12,085                                   | 376                                            | 1                                          | 0                             | 695                          | 376                   | 100.00           | 36,782,000  | 3,302          | 0.24 |
| AF442957.1                                | RSZ         | 129371                                         | 417           | 417                               | 99.041                                            | 4                           | 0                             | 6,223                                        | 6,639                                    | 417                                            | 1                                          | 0                             | 749                          | 417                   | 100.00           | 36,782,000  | 1,358          | 0.09 |
| AF442957.1                                | RSZ         | 130721                                         | 569           | 570                               | 98.772                                            | 5                           | 2                             | 7,405                                        | 7,973                                    | 569                                            | 1                                          | 0                             | 1013                         | 568                   | 99.82            | 36,782,000  | 3,664          | 0.17 |
| AF442957.1                                | RSZ         | 131101                                         | 667           | 279                               | 99.642                                            | 1                           | 0                             | 14,257                                       | 14,535                                   | 667                                            | 389                                        | 1.48E-143                     | 510                          | 279                   | 41.83            | 36,782,000  | 1,794          | 0.17 |
| AF442957.1                                | RSZ         | 131219                                         | 719           | 719                               | 100                                               | 0                           | 0                             | 3,845                                        | 4,563                                    | 1                                              | 719                                        | 0                             | 1328                         | 719                   | 100.00           | 36,782,000  | 4,790          | 0.18 |
| AF442957.1                                | RSZ         | 131389                                         | 793           | 793                               | 100                                               | 0                           | 0                             | 6,641                                        | 7,433                                    | 1                                              | 793                                        | 0                             | 1465                         | 793                   | 100.00           | 36,782,000  | 5,090          | 0.17 |
| AF442957.1                                | RSZ         | 131497                                         | 867           | 867                               | 99.885                                            | 1                           | 0                             | 12,077                                       | 12,943                                   | 1                                              | 867                                        | 0                             | 1596                         | 867                   | 100.00           | 36,782,000  | 7,898          | 0.25 |
| AF442957.1                                | RSZ         | 131815                                         | 1,330         | 1,332                             | 99.174                                            | 8                           | 3                             | 12,935                                       | 14,265                                   | 1,330                                          | 1                                          | 0                             | 2396                         | 1,329                 | 99.92            | 36,782,000  | 4,362          | 0.09 |
| AF442957.1                                | RSZ         | 131869                                         | 1,615         | 1,616                             | 99.443                                            | 6                           | 3                             | 4,616                                        | 6,229                                    | 1,615                                          | 1                                          | 0                             | 2931                         | 1,613                 | 99.88            | 36,782,000  | 14,370         | 0.24 |
| AF442957.1                                | RSZ         | 131905                                         | 1,847         | 1,845                             | 98.862                                            | 19                          | 2                             | 1,997                                        | 3,840                                    | 1,847                                          | 4                                          | 0                             | 3290                         | 1,843                 | 99.78            | 36,782,000  | 22,324         | 0.33 |

| Query<br>Sequence<br>Accession<br><i>aseqid</i> | Assembly<br>ID | Subject Sequence ID/Contig ID<br><i>sseqid</i> | Contig<br>Length | Alignment<br>Length<br><i>length</i> | Percentage<br>of Identical<br>Matches<br><i>percent</i> | Mismatch<br><i>mismatch</i> | Gap<br>Opening<br><i>gapopen</i> | Start of<br>Alignment<br>in Query<br><i>qstart</i> | End of<br>Alignment<br>in Query<br><i>qend</i> | Start of<br>Alignment<br>in Subject<br><i>sstart</i> | End of<br>Alignment<br>in Subject<br><i>send</i> | Expect<br>Value<br><i>evalue</i> | Bit Score<br><i>bitscore</i> | True<br>Alignment<br>Length | Percent<br>Coverage | Total<br>Reads | Reads to<br>Align | RPKM |
|-------------------------------------------------|----------------|------------------------------------------------|------------------|--------------------------------------|---------------------------------------------------------|-----------------------------|----------------------------------|----------------------------------------------------|------------------------------------------------|------------------------------------------------------|--------------------------------------------------|----------------------------------|------------------------------|-----------------------------|---------------------|----------------|-------------------|------|
| AF442957.1                                      | RSZ            | 131927                                         | 2,076            | 1,986                                | 99.799                                                  | 3                           | 1                                | 1                                                  | 1,986                                          | 92                                                   | 2,076                                            | 0                                | 3644                         | 1,985                       | 95.62               | 36,782,000     | 12,628            | 0.17 |
| AF442957.1                                      | RSZ            | 131973                                         | 3,611            | 3,613                                | 99.751                                                  | 6                           | 3                                | 8,062                                              | 11,673                                         | 3,611                                                | 1                                                | 0                                | 6619                         | 3,610                       | 99.97               | 36,782,000     | 28,482            | 0.21 |
